# Supplementary material
Source: PubMed Central journal article supplement (PMC2938118)

# abd-A NP\_732176.1 abdominal A CG10325-PB

R.FQTLELEKEFHFNHYLTR.R

|    | AA | A       | B       | Y       |    |
|----|----|---------|---------|---------|----|
| 1  | F  | 120.08  | 148.08  | -       | 18 |
| 2  | Q  | 248.14  | 276.13  | 2205.11 | 17 |
| 3  | T  | 349.19  | 377.18  | 2077.05 | 16 |
| 4  | L  | 462.27  | 490.27  | 1976.00 | 15 |
| 5  | E  | 591.31  | 619.31  | 1862.92 | 14 |
| 6  | L  | 704.40  | 732.39  | 1733.88 | 13 |
| 7  | E  | 833.44  | 861.44  | 1620.79 | 12 |
| 8  | K  | 961.54  | 989.53  | 1491.75 | 11 |
| 9  | E  | 1090.58 | 1118.57 | 1363.65 | 10 |
| 10 | F  | 1237.65 | 1265.64 | 1234.61 | 9  |
| 11 | H  | 1374.71 | 1402.70 | 1087.54 | 8  |
| 12 | F  | 1521.77 | 1549.77 | 950.48  | 7  |
| 13 | N  | 1635.82 | 1663.81 | 803.42  | 6  |
| 14 | H  | 1772.88 | 1800.87 | 689.37  | 5  |
| 15 | Y  | 1935.94 | 1963.93 | 552.31  | 4  |
| 16 | L  | 2049.02 | 2077.02 | 389.25  | 3  |
| 17 | T  | 2150.07 | 2178.07 | 276.17  | 2  |
| 18 | R  | -       | -       | 175.12  | 1  |

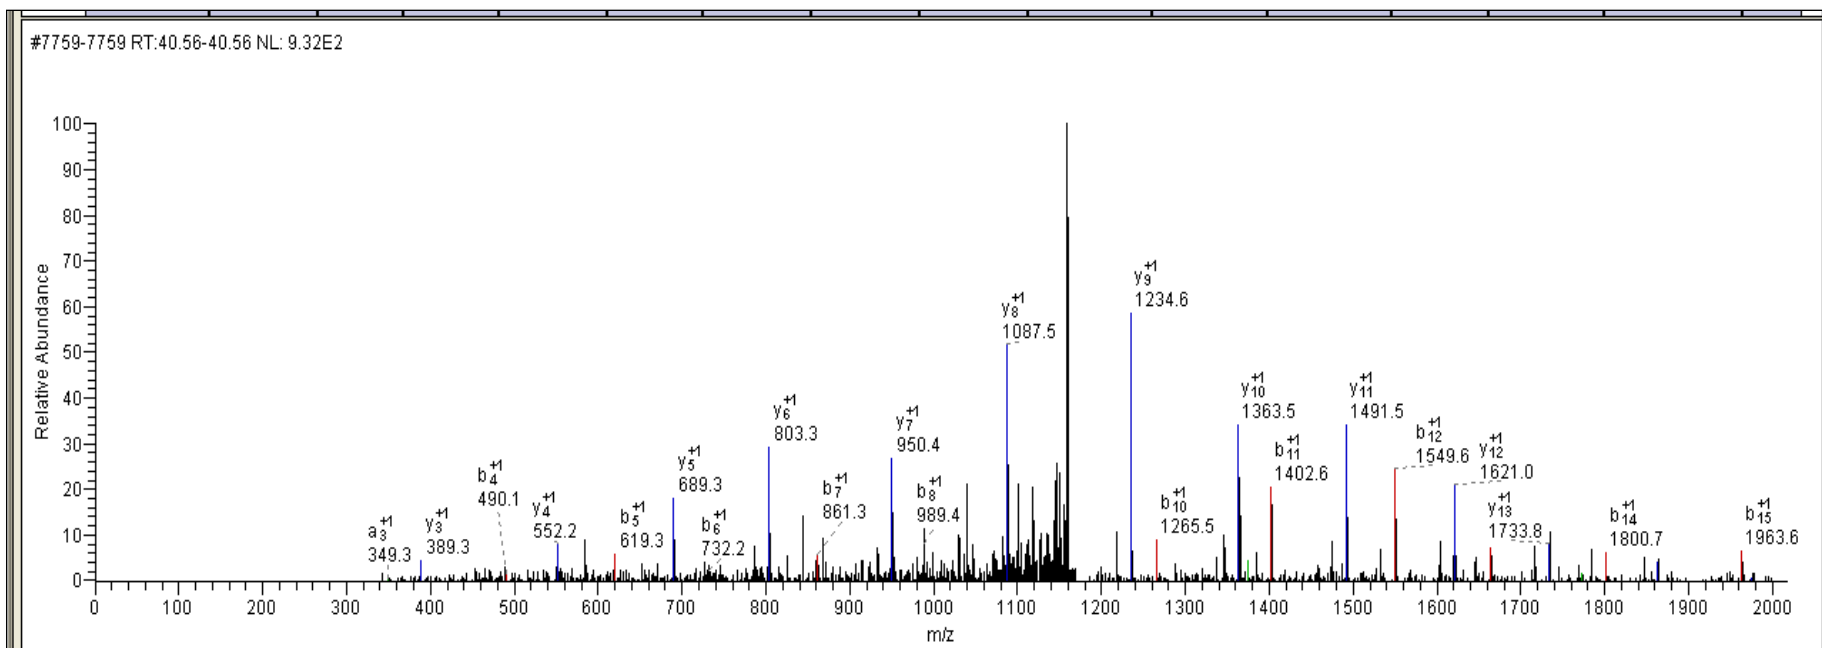

# ab NP\_476562.1 abrupt CG4807-PA

## R.YHESLLSNFGHAR.M

|    | AA | A       | B       | Y       |    |
|----|----|---------|---------|---------|----|
| 1  | Y  | 136.08  | 164.07  | -       | 13 |
| 2  | H  | 273.13  | 301.13  | 1367.68 | 12 |
| 3  | E  | 402.18  | 430.17  | 1230.62 | 11 |
| 4  | S  | 489.21  | 517.20  | 1101.58 | 10 |
| 5  | L  | 602.29  | 630.29  | 1014.55 | 9  |
| 6  | L  | 715.38  | 743.37  | 901.46  | 8  |
| 7  | S  | 802.41  | 830.40  | 788.38  | 7  |
| 8  | N  | 916.45  | 944.45  | 701.35  | 6  |
| 9  | F  | 1063.52 | 1091.52 | 587.30  | 5  |
| 10 | G  | 1120.54 | 1148.54 | 440.24  | 4  |
| 11 | H  | 1257.60 | 1285.60 | 383.21  | 3  |
| 12 | A  | 1328.64 | 1356.63 | 246.16  | 2  |
| 13 | R  | -       | -       | 175.12  | 1  |

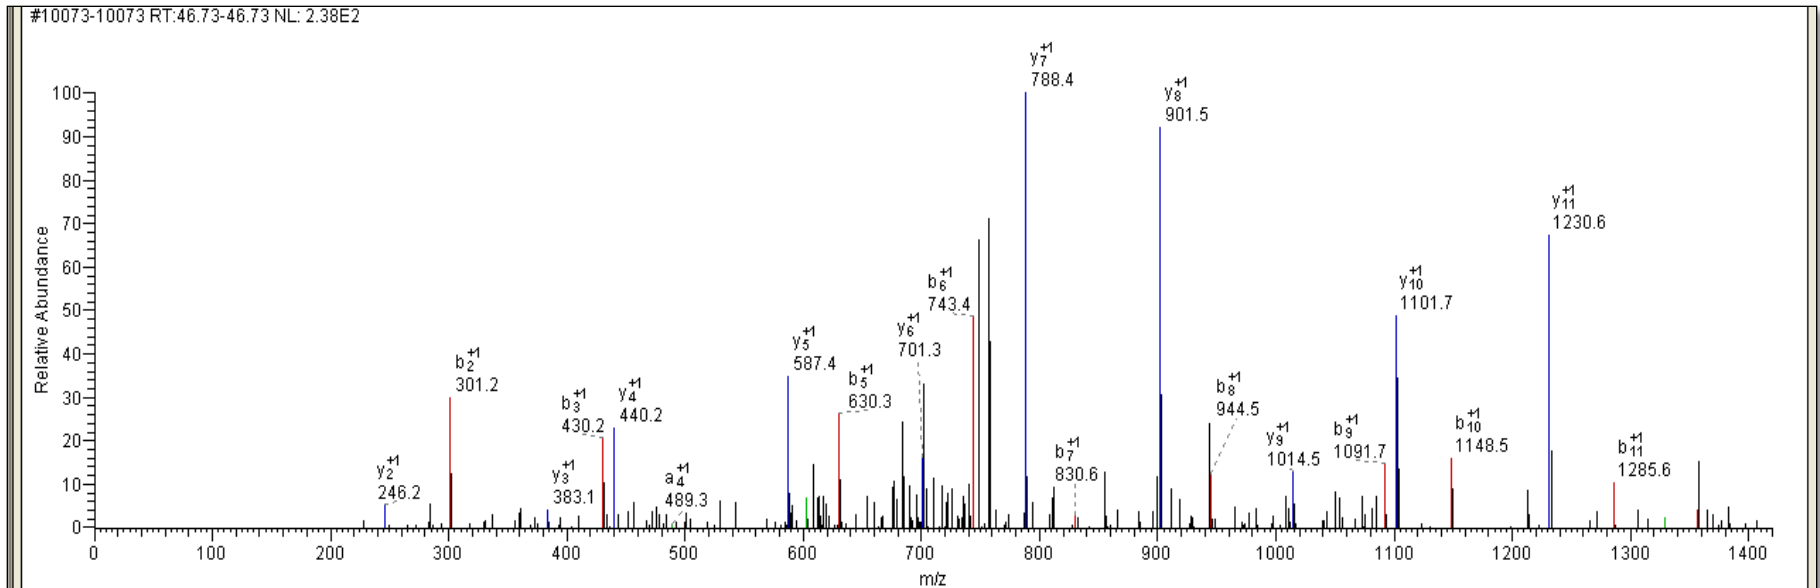

# Act87E NP\_477091.1 Actin 87E CG18290-PA

## K.DLYANIVMSGGTTMYPGIADR.M

|    | AA | A       | B       | Y       |    |
|----|----|---------|---------|---------|----|
| 1  | D  | 88.04   | 116.03  | -       | 21 |
| 2  | L  | 201.12  | 229.12  | 2146.03 | 20 |
| 3  | Y  | 364.19  | 392.18  | 2032.95 | 19 |
| 4  | A  | 435.22  | 463.22  | 1869.88 | 18 |
| 5  | N  | 549.27  | 577.26  | 1798.85 | 17 |
| 6  | I  | 662.35  | 690.35  | 1684.80 | 16 |
| 7  | V  | 761.42  | 789.41  | 1571.72 | 15 |
| 8  | M  | 892.46  | 920.45  | 1472.65 | 14 |
| 9  | S  | 979.49  | 1007.49 | 1341.61 | 13 |
| 10 | G  | 1036.51 | 1064.51 | 1254.58 | 12 |
| 11 | G  | 1093.53 | 1121.53 | 1197.56 | 11 |
| 12 | T  | 1194.58 | 1222.58 | 1140.54 | 10 |
| 13 | T  | 1295.63 | 1323.62 | 1039.49 | 9  |
| 14 | M* | 1442.67 | 1470.66 | 938.44  | 8  |
| 15 | Y  | 1605.73 | 1633.72 | 791.40  | 7  |
| 16 | P  | 1702.78 | 1730.78 | 628.34  | 6  |
| 17 | G  | 1759.80 | 1787.80 | 531.29  | 5  |
| 18 | I  | 1872.89 | 1900.88 | 474.27  | 4  |
| 19 | A  | 1943.92 | 1971.92 | 361.18  | 3  |
| 20 | D  | 2058.95 | 2086.95 | 290.15  | 2  |
| 21 | R  | -       | -       | 175.12  | 1  |

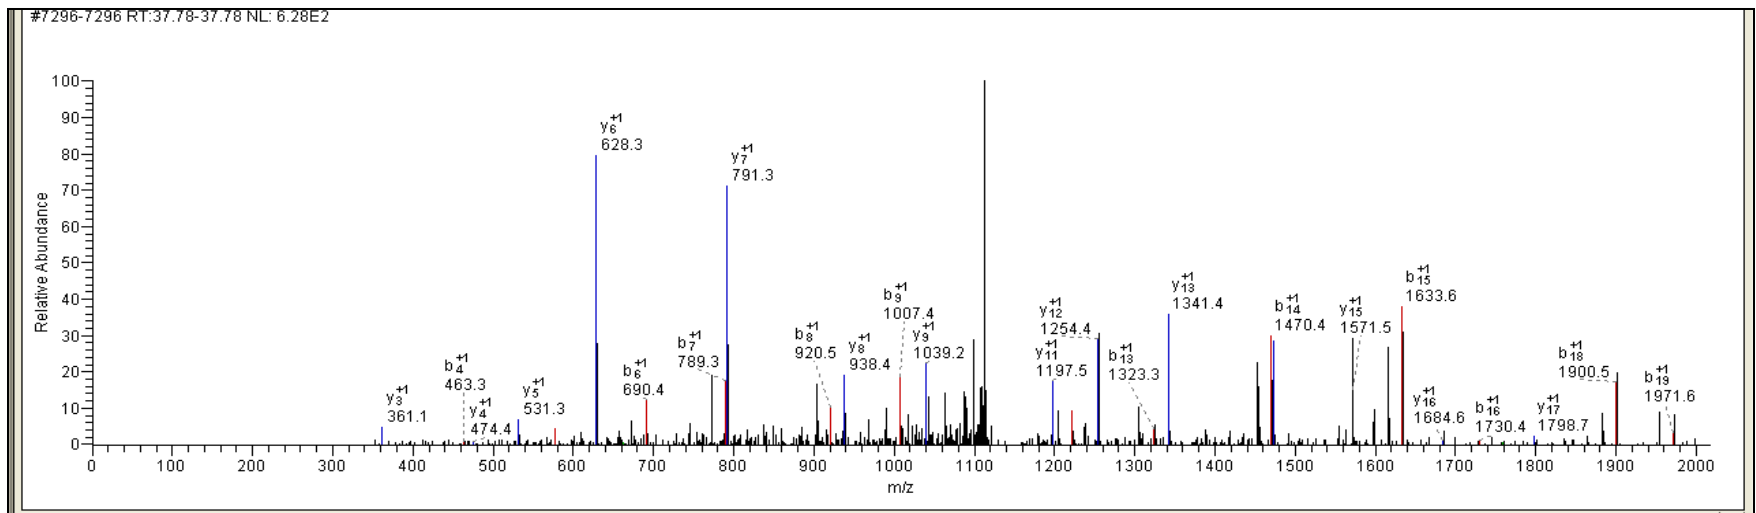

K.DATIAAAAAAAAAAALSNSQQDLKDVR.I

| S no | AA | A       | B       | Y       |    |
|------|----|---------|---------|---------|----|
| 1    | D  | 88.04   | 116.03  | -       | 28 |
| 2    | A  | 159.08  | 187.07  | 2540.34 | 27 |
| 3    | T  | 260.12  | 288.12  | 2469.31 | 26 |
| 4    | I  | 373.21  | 401.2   | 2368.26 | 25 |
| 5    | A  | 444.25  | 472.24  | 2255.17 | 24 |
| 6    | A  | 515.28  | 543.28  | 2184.14 | 23 |
| 7    | A  | 586.32  | 614.31  | 2113.1  | 22 |
| 8    | A  | 657.36  | 685.35  | 2042.06 | 21 |
| 9    | A  | 728.39  | 756.39  | 1971.03 | 20 |
| 10   | A  | 799.43  | 827.43  | 1899.99 | 19 |
| 11   | A  | 870.47  | 898.46  | 1828.95 | 18 |
| 12   | A  | 941.51  | 969.5   | 1757.91 | 17 |
| 13   | A  | 1012.54 | 1040.54 | 1686.88 | 16 |
| 14   | A  | 1083.58 | 1111.57 | 1615.84 | 15 |
| 15   | A  | 1154.62 | 1182.61 | 1544.8  | 14 |
| 16   | A  | 1225.65 | 1253.65 | 1473.77 | 13 |
| 17   | L  | 1338.74 | 1366.73 | 1402.73 | 12 |
| 18   | S  | 1425.77 | 1453.76 | 1289.64 | 11 |
| 19   | N  | 1539.81 | 1567.81 | 1202.61 | 10 |
| 20   | S  | 1626.84 | 1654.84 | 1088.57 | 9  |
| 21   | Q  | 1754.9  | 1782.9  | 1001.54 | 8  |
| 22   | Q  | 1882.96 | 1910.96 | 873.48  | 7  |
| 23   | D  | 1997.99 | 2025.98 | 745.42  | 6  |
| 24   | L  | 2111.07 | 2139.07 | 630.39  | 5  |
| 25   | K  | 2239.17 | 2267.16 | 517.31  | 4  |
| 26   | D  | 2354.19 | 2382.19 | 389.21  | 3  |
| 27   | V  | 2453.26 | 2481.26 | 274.19  | 2  |
| 28   | R  | -       | -       | 175.12  | 1  |

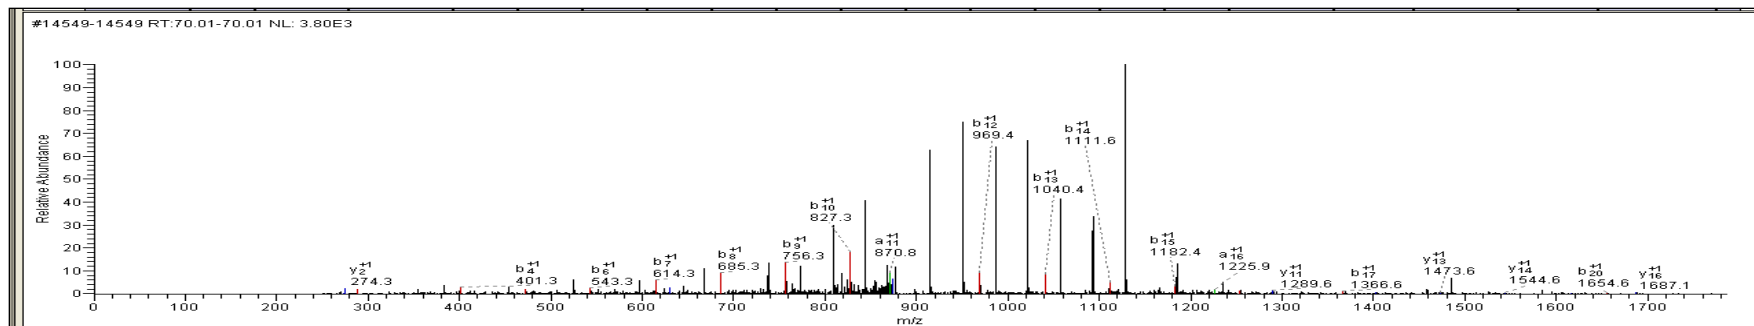

# Actn NP\_477484.2 alpha actinin CG4376-PA

## K.ATLGEADKEFNLIVNLVR.E

|    | AA | A       | B       | Y       |    |
|----|----|---------|---------|---------|----|
| 1  | A  | 44.05   | 72.04   | -       | 18 |
| 2  | T  | 145.10  | 173.09  | 1931.06 | 17 |
| 3  | L  | 258.18  | 286.18  | 1830.01 | 16 |
| 4  | G  | 315.20  | 343.20  | 1716.93 | 15 |
| 5  | E  | 444.25  | 472.24  | 1659.91 | 14 |
| 6  | A  | 515.28  | 543.28  | 1530.86 | 13 |
| 7  | D  | 630.31  | 658.30  | 1459.83 | 12 |
| 8  | K  | 758.40  | 786.40  | 1344.80 | 11 |
| 9  | E  | 887.45  | 915.44  | 1216.70 | 10 |
| 10 | F  | 1034.52 | 1062.51 | 1087.66 | 9  |
| 11 | N  | 1148.56 | 1176.55 | 940.59  | 8  |
| 12 | L  | 1261.64 | 1289.64 | 826.55  | 7  |
| 13 | I  | 1374.73 | 1402.72 | 713.47  | 6  |
| 14 | V  | 1473.79 | 1501.79 | 600.38  | 5  |
| 15 | N  | 1587.84 | 1615.83 | 501.31  | 4  |
| 16 | L  | 1700.92 | 1728.92 | 387.27  | 3  |
| 17 | V  | 1799.99 | 1827.99 | 274.19  | 2  |
| 18 | R  | -       | -       | 175.12  | 1  |

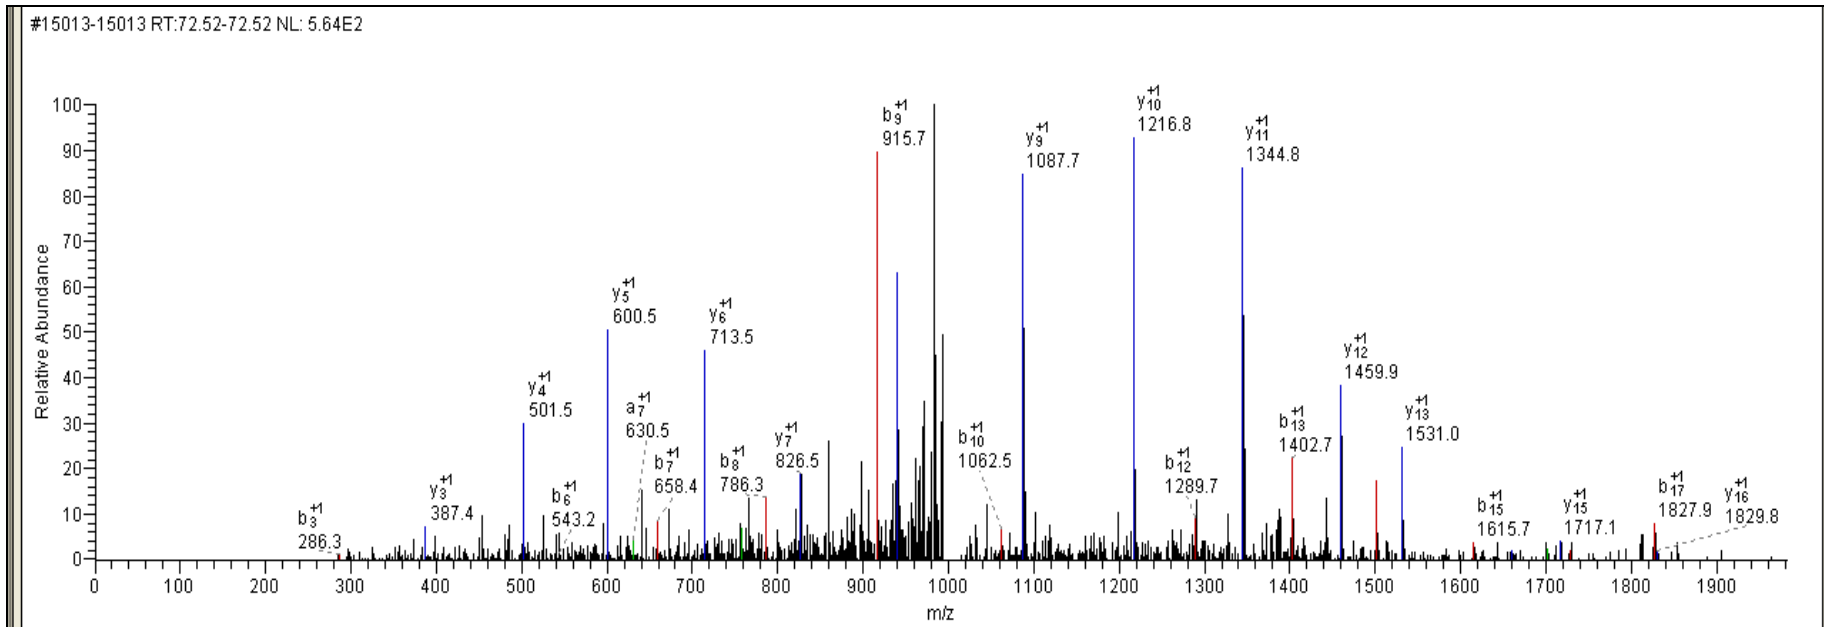

# Acf1 NP\_536734.2

## ATP-dependent chromatin assembly factor large subunit CG1966-PA

### R.IIQFENDIYTGDLGR.L

|    | AA | A       | B       | Y       |    |
|----|----|---------|---------|---------|----|
| 1  | I  | 86.10   | 114.09  | -       | 15 |
| 2  | I  | 199.18  | 227.18  | 1640.79 | 14 |
| 3  | Q  | 327.24  | 355.23  | 1527.71 | 13 |
| 4  | F  | 474.31  | 502.30  | 1399.65 | 12 |
| 5  | E  | 603.35  | 631.34  | 1252.58 | 11 |
| 6  | N  | 717.39  | 745.39  | 1123.54 | 10 |
| 7  | D  | 832.42  | 860.41  | 1009.49 | 9  |
| 8  | I  | 945.50  | 973.50  | 894.47  | 8  |
| 9  | Y  | 1108.57 | 1136.56 | 781.38  | 7  |
| 10 | T  | 1209.62 | 1237.61 | 618.32  | 6  |
| 11 | G  | 1266.64 | 1294.63 | 517.27  | 5  |
| 12 | D  | 1381.66 | 1409.66 | 460.25  | 4  |
| 13 | L  | 1494.75 | 1522.74 | 345.22  | 3  |
| 14 | G  | 1551.77 | 1579.76 | 232.14  | 2  |
| 15 | R  | -       | -       | 175.12  | 1  |

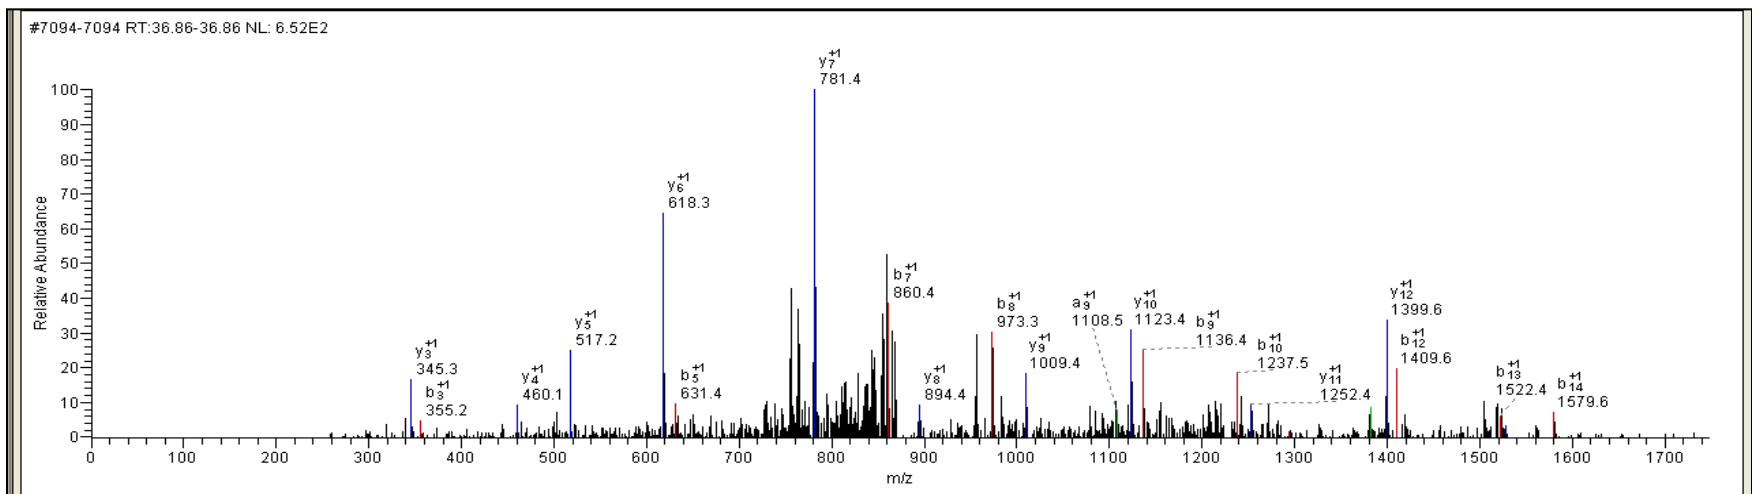

bel NP\_536783.1 belle CG9748-PA

R.ELATQIFEEAKK.F

|    | AA | A       | B       | Y       |    |
|----|----|---------|---------|---------|----|
| 1  | E  | 102.05  | 130.05  | -       | 12 |
| 2  | L  | 215.14  | 243.13  | 1277.71 | 11 |
| 3  | A  | 286.18  | 314.17  | 1164.63 | 10 |
| 4  | T  | 387.22  | 415.22  | 1093.59 | 9  |
| 5  | Q  | 515.28  | 543.28  | 992.54  | 8  |
| 6  | I  | 628.37  | 656.36  | 864.48  | 7  |
| 7  | F  | 775.43  | 803.43  | 751.40  | 6  |
| 8  | E  | 904.48  | 932.47  | 604.33  | 5  |
| 9  | E  | 1033.52 | 1061.51 | 475.29  | 4  |
| 10 | A  | 1104.56 | 1132.55 | 346.24  | 3  |
| 11 | K  | 1232.65 | 1260.65 | 275.21  | 2  |
| 12 | K  | -       | -       | 147.11  | 1  |

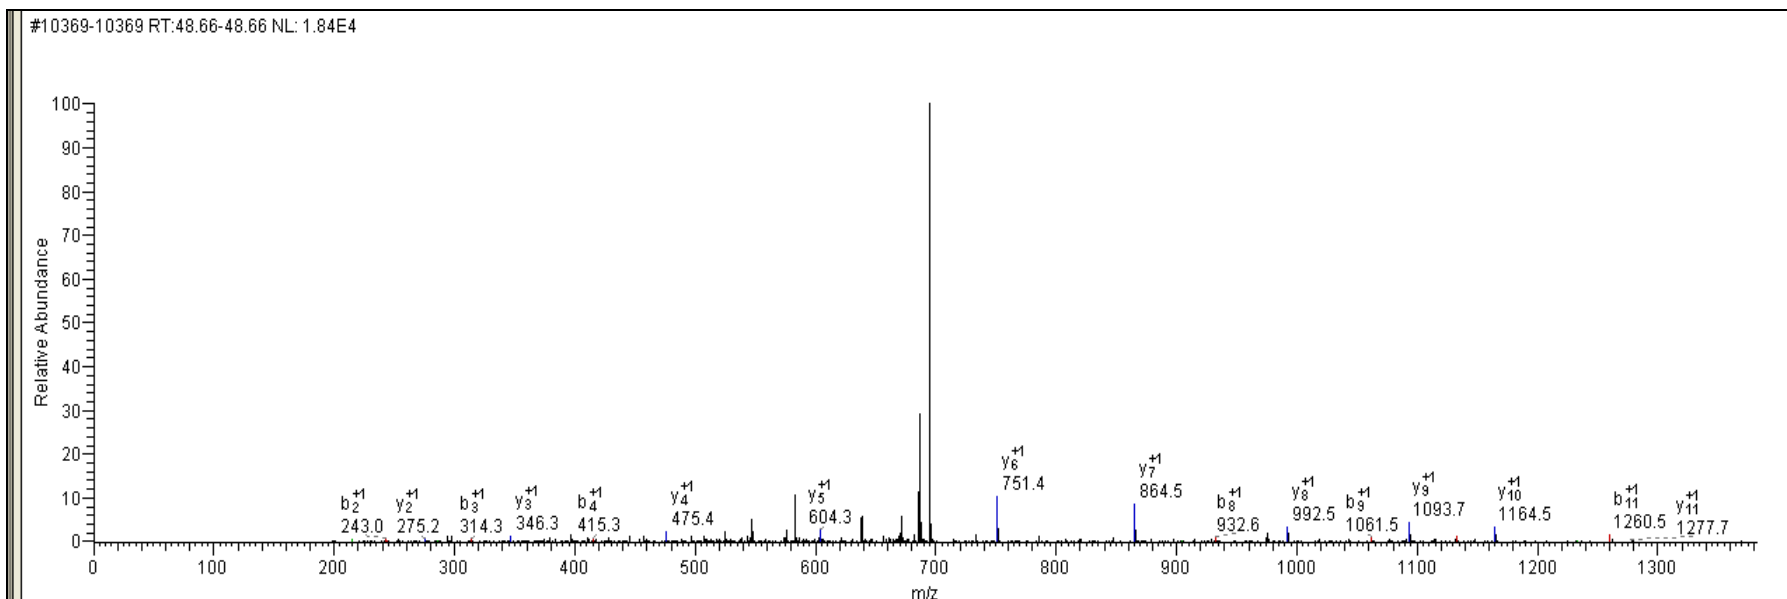

NP\_725418.1

Boundary element-associated factor of 32kD CG10159-PB

K.GNNTTNLWTHLR.H

|    | AA | A       | B       | Y       |    |
|----|----|---------|---------|---------|----|
| 1  | G  | 30.03   | 58.03   | -       | 12 |
| 2  | N  | 144.08  | 172.07  | 1369.70 | 11 |
| 3  | N  | 258.12  | 286.11  | 1255.65 | 10 |
| 4  | T  | 359.17  | 387.16  | 1141.61 | 9  |
| 5  | T  | 460.22  | 488.21  | 1040.56 | 8  |
| 6  | N  | 574.26  | 602.25  | 939.52  | 7  |
| 7  | L  | 687.34  | 715.34  | 825.47  | 6  |
| 8  | WV | 873.42  | 901.42  | 712.39  | 5  |
| 9  | T  | 974.47  | 1002.46 | 526.31  | 4  |
| 10 | H  | 1111.53 | 1139.52 | 425.26  | 3  |
| 11 | L  | 1224.61 | 1252.61 | 288.20  | 2  |
| 12 | R  | -       | -       | 175.12  | 1  |

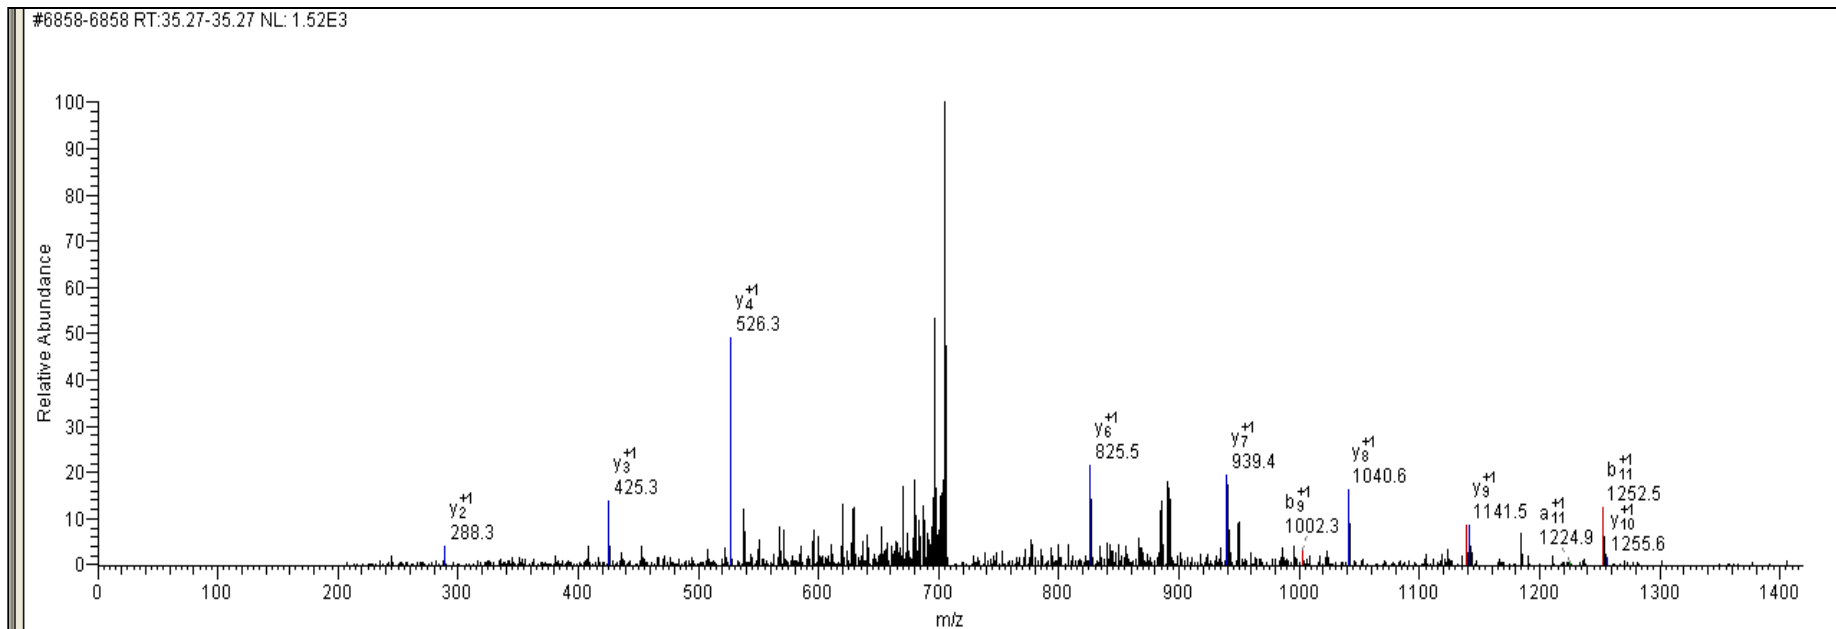



# Ca-P60A NP\_476832.1 Calcium ATPase at 60A CG3725-PA

## K.SAAEMVLADDNFSSIVSAVEEGR.A

| S no | AA | A       | B       | Y       |    |
|------|----|---------|---------|---------|----|
| 1    | S  | 60.04   | 88.04   | -       | 23 |
| 2    | A  | 131.08  | 159.08  | 2310.09 | 22 |
| 3    | A  | 202.12  | 230.11  | 2239.05 | 21 |
| 4    | E  | 331.16  | 359.16  | 2168.02 | 20 |
| 5    | M  | 462.2   | 490.2   | 2038.97 | 19 |
| 6    | V  | 561.27  | 589.27  | 1907.93 | 18 |
| 7    | L  | 674.35  | 702.35  | 1808.87 | 17 |
| 8    | A  | 745.39  | 773.39  | 1695.78 | 16 |
| 9    | D  | 860.42  | 888.41  | 1624.74 | 15 |
| 10   | D  | 975.45  | 1003.44 | 1509.72 | 14 |
| 11   | N  | 1089.49 | 1117.48 | 1394.69 | 13 |
| 12   | F  | 1236.56 | 1264.55 | 1280.65 | 12 |
| 13   | S  | 1323.59 | 1351.58 | 1133.58 | 11 |
| 14   | S  | 1410.62 | 1438.62 | 1046.55 | 10 |
| 15   | I  | 1523.7  | 1551.7  | 959.52  | 9  |
| 16   | V  | 1622.77 | 1650.77 | 846.43  | 8  |
| 17   | S  | 1709.81 | 1737.8  | 747.36  | 7  |
| 18   | A  | 1780.84 | 1808.84 | 660.33  | 6  |
| 19   | V  | 1879.91 | 1907.91 | 589.29  | 5  |
| 20   | E  | 2008.95 | 2036.95 | 490.23  | 4  |
| 21   | E  | 2138    | 2165.99 | 361.18  | 3  |
| 22   | G  | 2195.02 | 2223.01 | 232.14  | 2  |
| 23   | R  | -       | -       | 175.12  | 1  |

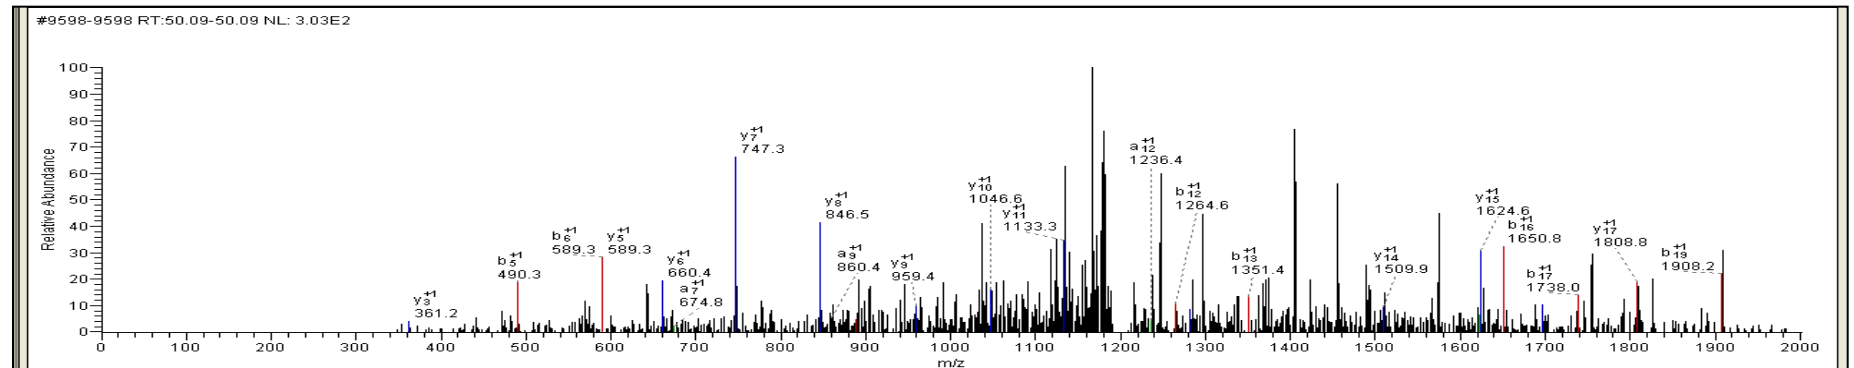

# Ccp84Ae NP\_649679.1 Ccp84Ae CG1330-PA

## R.TAAPVAVASAPVPVLAK.T

|    | AA | A       | B       | Y       |    |
|----|----|---------|---------|---------|----|
| 1  | T  | 74.06   | 102.05  | -       | 17 |
| 2  | A  | 145.10  | 173.09  | 1460.88 | 16 |
| 3  | A  | 216.13  | 244.13  | 1389.85 | 15 |
| 4  | P  | 313.19  | 341.18  | 1318.81 | 14 |
| 5  | V  | 412.26  | 440.25  | 1221.76 | 13 |
| 6  | A  | 483.29  | 511.29  | 1122.69 | 12 |
| 7  | V  | 582.36  | 610.36  | 1051.65 | 11 |
| 8  | A  | 653.40  | 681.39  | 952.58  | 10 |
| 9  | S  | 740.43  | 768.43  | 881.55  | 9  |
| 10 | A  | 811.47  | 839.46  | 794.51  | 8  |
| 11 | P  | 908.52  | 936.51  | 723.48  | 7  |
| 12 | V  | 1007.59 | 1035.58 | 626.42  | 6  |
| 13 | P  | 1104.64 | 1132.64 | 527.36  | 5  |
| 14 | V  | 1203.71 | 1231.70 | 430.30  | 4  |
| 15 | L  | 1316.79 | 1344.79 | 331.23  | 3  |
| 16 | A  | 1387.83 | 1415.83 | 218.15  | 2  |
| 17 | K  | -       | -       | 147.11  | 1  |

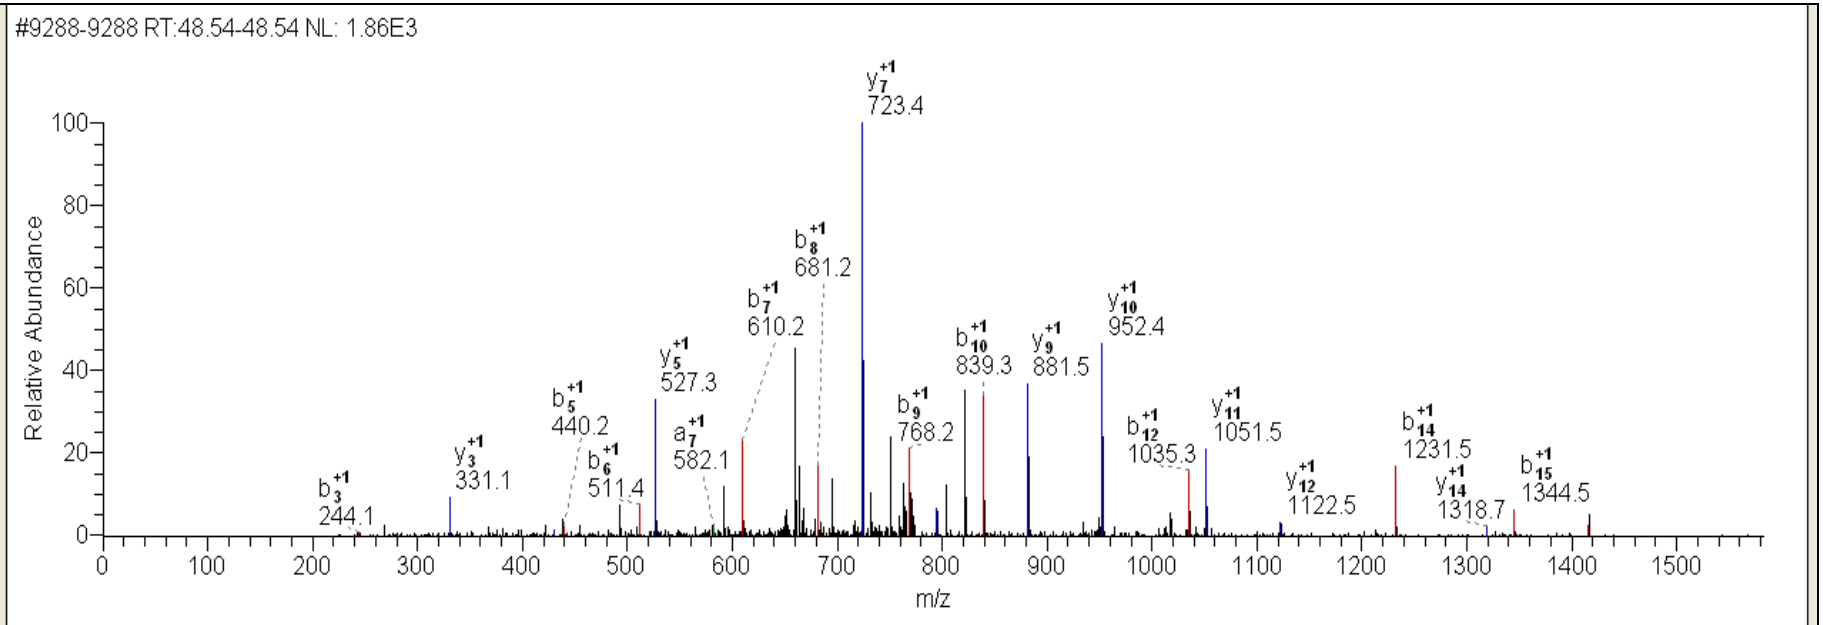

# NP\_649652.3 CG1024 CG1024-PA

## K.SVEGTVEALLNHLR.E

|    | AA | A       | B       | Y       |    |
|----|----|---------|---------|---------|----|
| 1  | S  | 60.04   | 88.04   | -       | 14 |
| 2  | V  | 159.11  | 187.11  | 1450.80 | 13 |
| 3  | E  | 288.16  | 316.15  | 1351.73 | 12 |
| 4  | G  | 345.18  | 373.17  | 1222.69 | 11 |
| 5  | T  | 446.22  | 474.22  | 1165.67 | 10 |
| 6  | V  | 545.29  | 573.29  | 1064.62 | 9  |
| 7  | E  | 674.34  | 702.33  | 965.55  | 8  |
| 8  | A  | 745.37  | 773.37  | 836.51  | 7  |
| 9  | L  | 858.46  | 886.45  | 765.47  | 6  |
| 10 | L  | 971.54  | 999.54  | 652.39  | 5  |
| 11 | N  | 1085.58 | 1113.58 | 539.30  | 4  |
| 12 | H  | 1222.64 | 1250.64 | 425.26  | 3  |
| 13 | L  | 1335.73 | 1363.72 | 288.20  | 2  |
| 14 | R  | -       | -       | 175.12  | 1  |

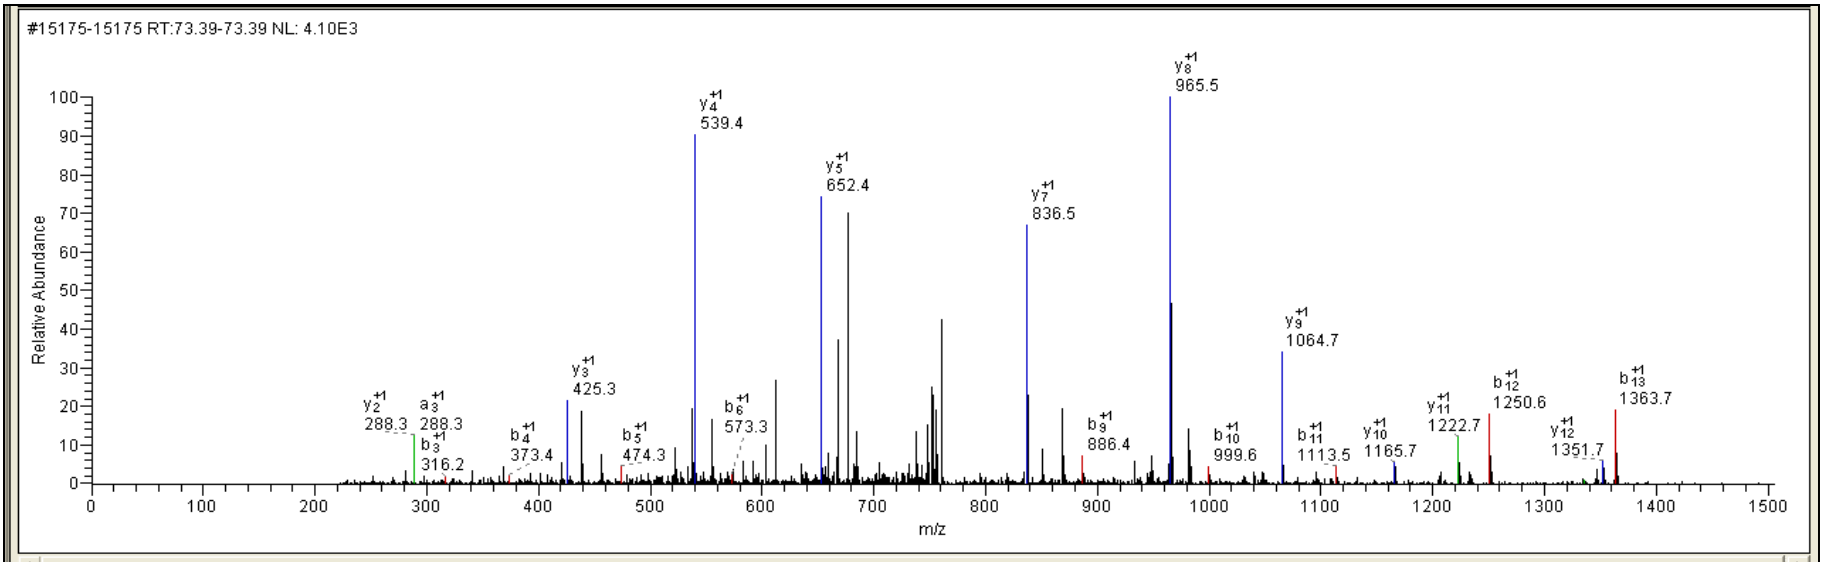

# CG10413 NP\_609887.1 CG10413 CG10413-PA

## K.LEQSLKELR.I

|   | AA | A      | B      | Y       |   |
|---|----|--------|--------|---------|---|
| 1 | L  | 86.10  | 114.09 | -       | 9 |
| 2 | E  | 215.14 | 243.13 | 1002.56 | 8 |
| 3 | Q  | 343.20 | 371.19 | 873.52  | 7 |
| 4 | S  | 430.23 | 458.22 | 745.46  | 6 |
| 5 | L  | 543.31 | 571.31 | 658.42  | 5 |
| 6 | K  | 671.41 | 699.40 | 545.34  | 4 |
| 7 | E  | 800.45 | 828.45 | 417.25  | 3 |
| 8 | L  | 913.54 | 941.53 | 288.20  | 2 |
| 9 | R  | -      | -      | 175.12  | 1 |

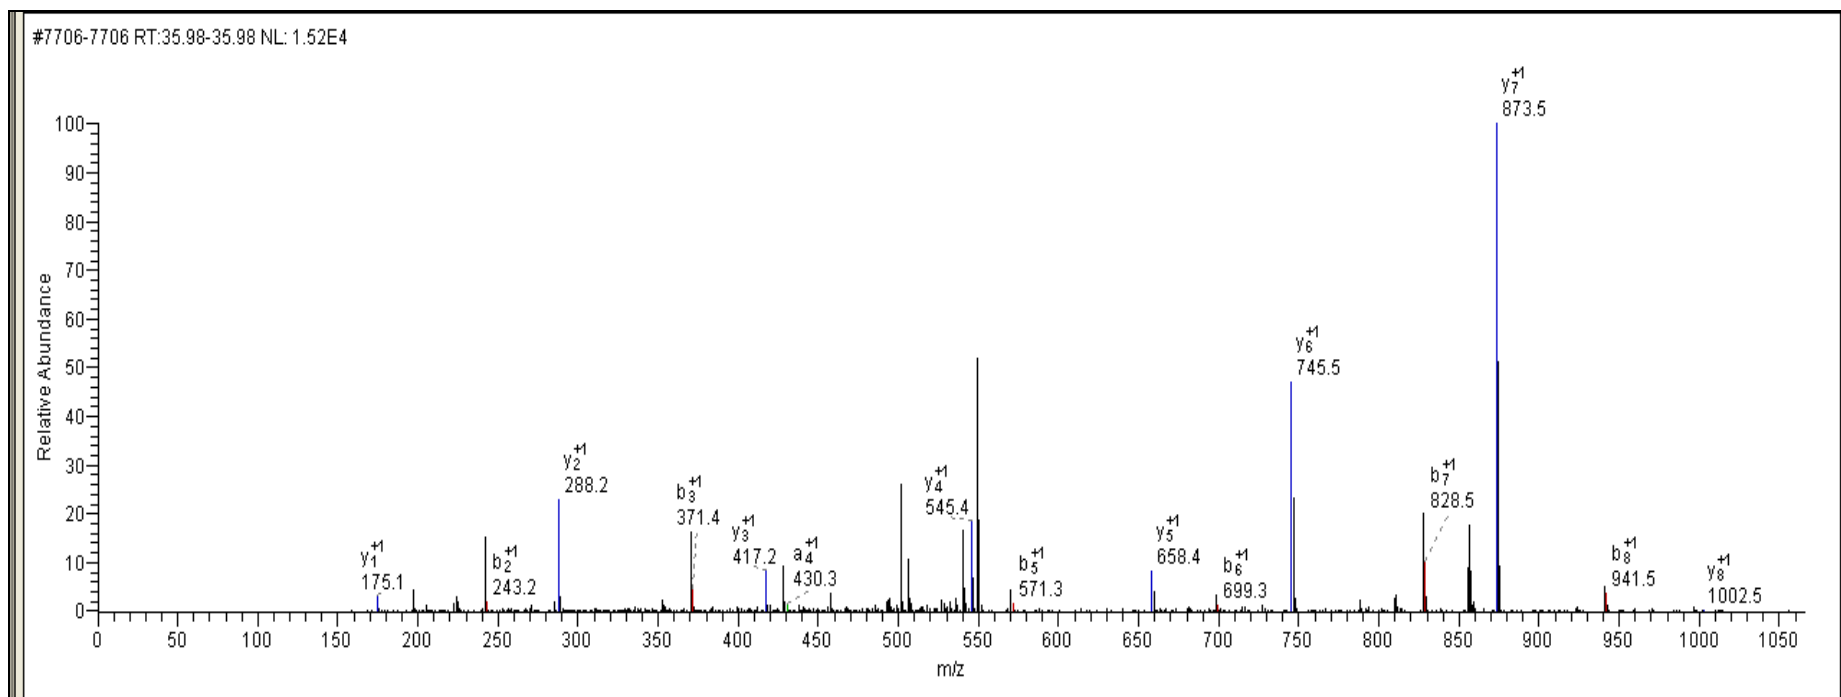

# NP\_649751.1 CG10445 CG10445-PA

## R.FVNVPNFQDLQQWK.K

|    | AA | A       | B       | Y       |    |
|----|----|---------|---------|---------|----|
| 1  | F  | 120.08  | 148.08  | -       | 14 |
| 2  | V  | 219.15  | 247.14  | 1615.82 | 13 |
| 3  | N  | 333.19  | 361.19  | 1516.75 | 12 |
| 4  | V  | 432.26  | 460.26  | 1402.71 | 11 |
| 5  | P  | 529.31  | 557.31  | 1303.64 | 10 |
| 6  | N  | 643.36  | 671.35  | 1206.59 | 9  |
| 7  | F  | 790.42  | 818.42  | 1092.55 | 8  |
| 8  | Q  | 918.48  | 946.48  | 945.48  | 7  |
| 9  | D  | 1033.51 | 1061.51 | 817.42  | 6  |
| 10 | L  | 1146.59 | 1174.59 | 702.39  | 5  |
| 11 | Q  | 1274.65 | 1302.65 | 589.31  | 4  |
| 12 | Q  | 1402.71 | 1430.71 | 461.25  | 3  |
| 13 | W  | 1588.79 | 1616.79 | 333.19  | 2  |
| 14 | K  | -       | -       | 147.11  | 1  |

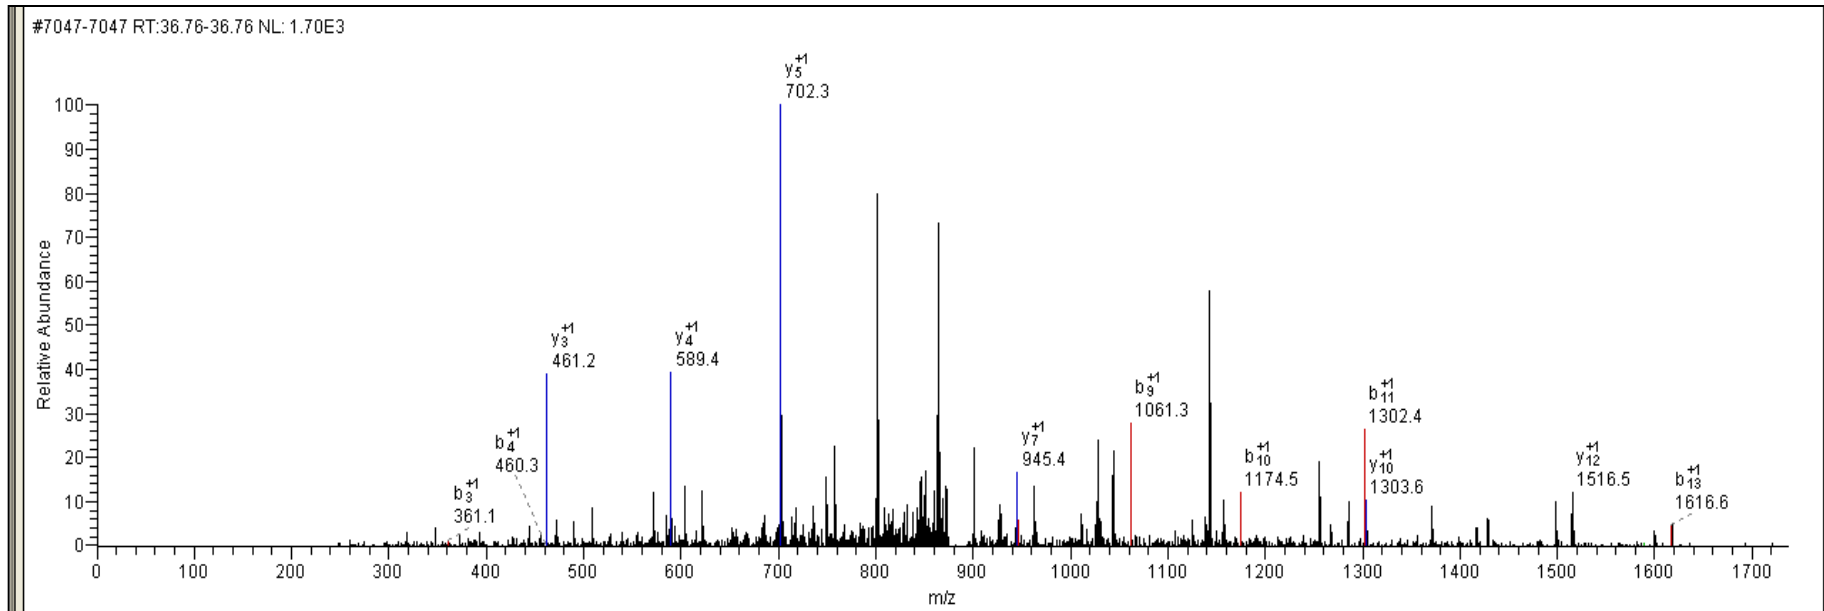

# Bre1 NP\_647989.2 CG10542 CG10542-PA

## R.SLQATVASIEKELMLR.Q

|    | AA | A       | B       | Y       |    |
|----|----|---------|---------|---------|----|
| 1  | S  | 60.04   | 88.04   | -       | 16 |
| 2  | L  | 173.13  | 201.12  | 1717.95 | 15 |
| 3  | Q  | 301.19  | 329.18  | 1604.87 | 14 |
| 4  | A  | 372.22  | 400.22  | 1476.81 | 13 |
| 5  | T  | 473.27  | 501.27  | 1405.77 | 12 |
| 6  | V  | 572.34  | 600.34  | 1304.72 | 11 |
| 7  | A  | 643.38  | 671.37  | 1205.66 | 10 |
| 8  | S  | 730.41  | 758.40  | 1134.62 | 9  |
| 9  | I  | 843.49  | 871.49  | 1047.59 | 8  |
| 10 | E  | 972.54  | 1000.53 | 934.50  | 7  |
| 11 | K  | 1100.63 | 1128.63 | 805.46  | 6  |
| 12 | E  | 1229.67 | 1257.67 | 677.37  | 5  |
| 13 | L  | 1342.76 | 1370.75 | 548.32  | 4  |
| 14 | M* | 1489.79 | 1517.79 | 435.24  | 3  |
| 15 | L  | 1602.88 | 1630.87 | 288.20  | 2  |
| 16 | R  | -       | -       | 175.12  | 1  |

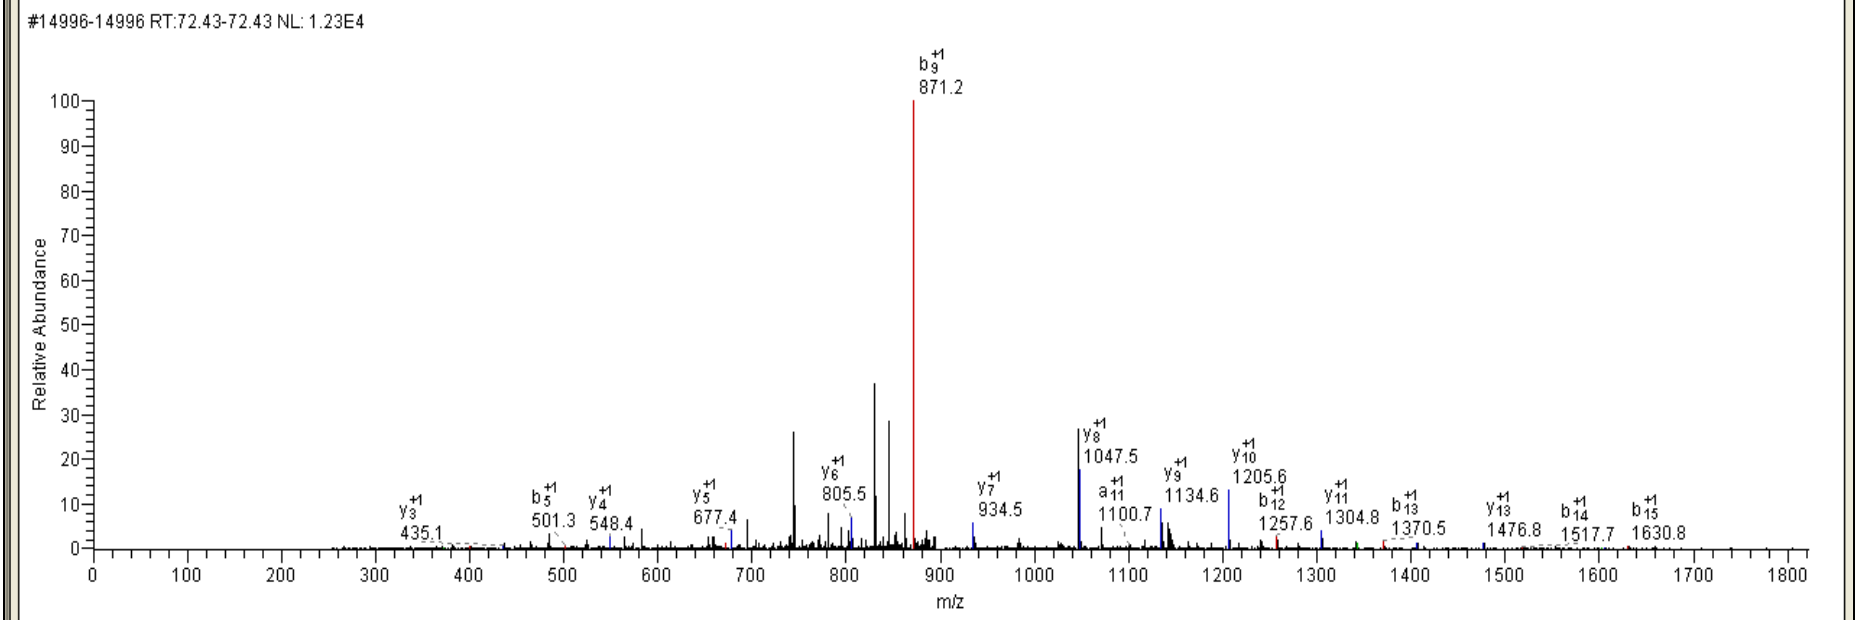

NP\_572929.1 CG11092 CG11092-PA

R.LGDIINRLDAALVVR.K

|    | AA | A       | B       | Y       |    |
|----|----|---------|---------|---------|----|
| 1  | L  | 86.10   | 114.09  | -       | 15 |
| 2  | G  | 143.12  | 171.11  | 1524.89 | 14 |
| 3  | D  | 258.14  | 286.14  | 1467.86 | 13 |
| 4  | I  | 371.23  | 399.22  | 1352.84 | 12 |
| 5  | I  | 484.31  | 512.31  | 1239.75 | 11 |
| 6  | N  | 598.36  | 626.35  | 1126.67 | 10 |
| 7  | R  | 754.46  | 782.45  | 1012.63 | 9  |
| 8  | L  | 867.54  | 895.54  | 856.53  | 8  |
| 9  | D  | 982.57  | 1010.56 | 743.44  | 7  |
| 10 | A  | 1053.61 | 1081.60 | 628.41  | 6  |
| 11 | A  | 1124.64 | 1152.64 | 557.38  | 5  |
| 12 | L  | 1237.73 | 1265.72 | 486.34  | 4  |
| 13 | V  | 1336.79 | 1364.79 | 373.26  | 3  |
| 14 | V  | 1435.86 | 1463.86 | 274.19  | 2  |
| 15 | R  | -       | -       | 175.12  | 1  |

#14112-14112 RT:67.69-67.69 NL: 1.51E4

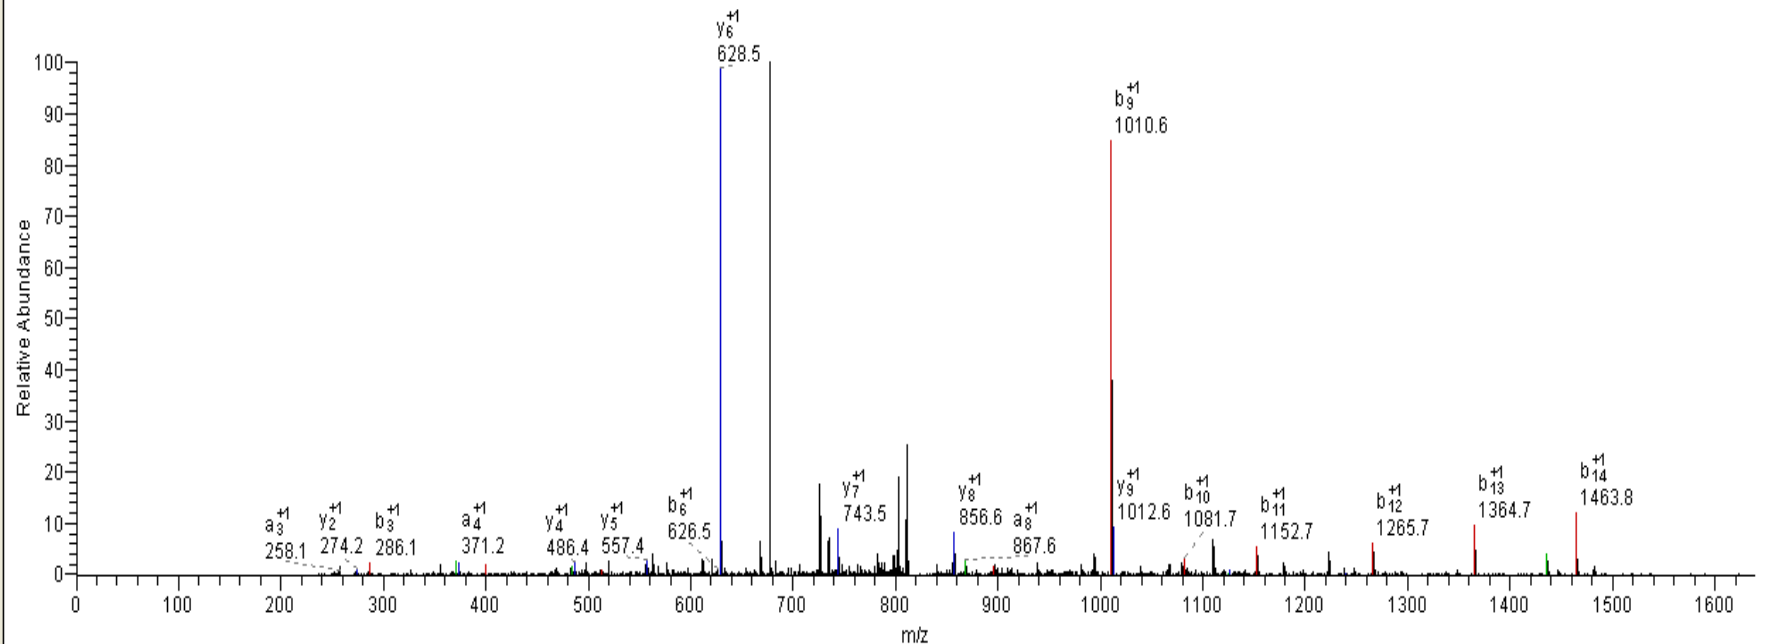

# CG11963 NP\_649846.2 CG11963 CG11963-PA

## R.VVYDPQTAELSSK.M

|    | AA | A       | B       | Y       |    |
|----|----|---------|---------|---------|----|
| 1  | V  | 72.08   | 100.08  | -       | 14 |
| 2  | V  | 171.15  | 199.14  | 1466.70 | 13 |
| 3  | Y  | 334.21  | 362.21  | 1367.63 | 12 |
| 4  | D  | 449.24  | 477.23  | 1204.57 | 11 |
| 5  | P  | 546.29  | 574.29  | 1089.54 | 10 |
| 6  | Q  | 674.35  | 702.35  | 992.49  | 9  |
| 7  | T  | 775.40  | 803.39  | 864.43  | 8  |
| 8  | A  | 846.44  | 874.43  | 763.38  | 7  |
| 9  | E  | 975.48  | 1003.47 | 692.35  | 6  |
| 10 | E  | 1104.52 | 1132.52 | 563.30  | 5  |
| 11 | L  | 1217.60 | 1245.60 | 434.26  | 4  |
| 12 | S  | 1304.64 | 1332.63 | 321.18  | 3  |
| 13 | S  | 1391.67 | 1419.66 | 234.14  | 2  |
| 14 | K  | -       | -       | 147.11  | 1  |

#5670-5670 RT:29.22-29.22 NL: 2.69E3

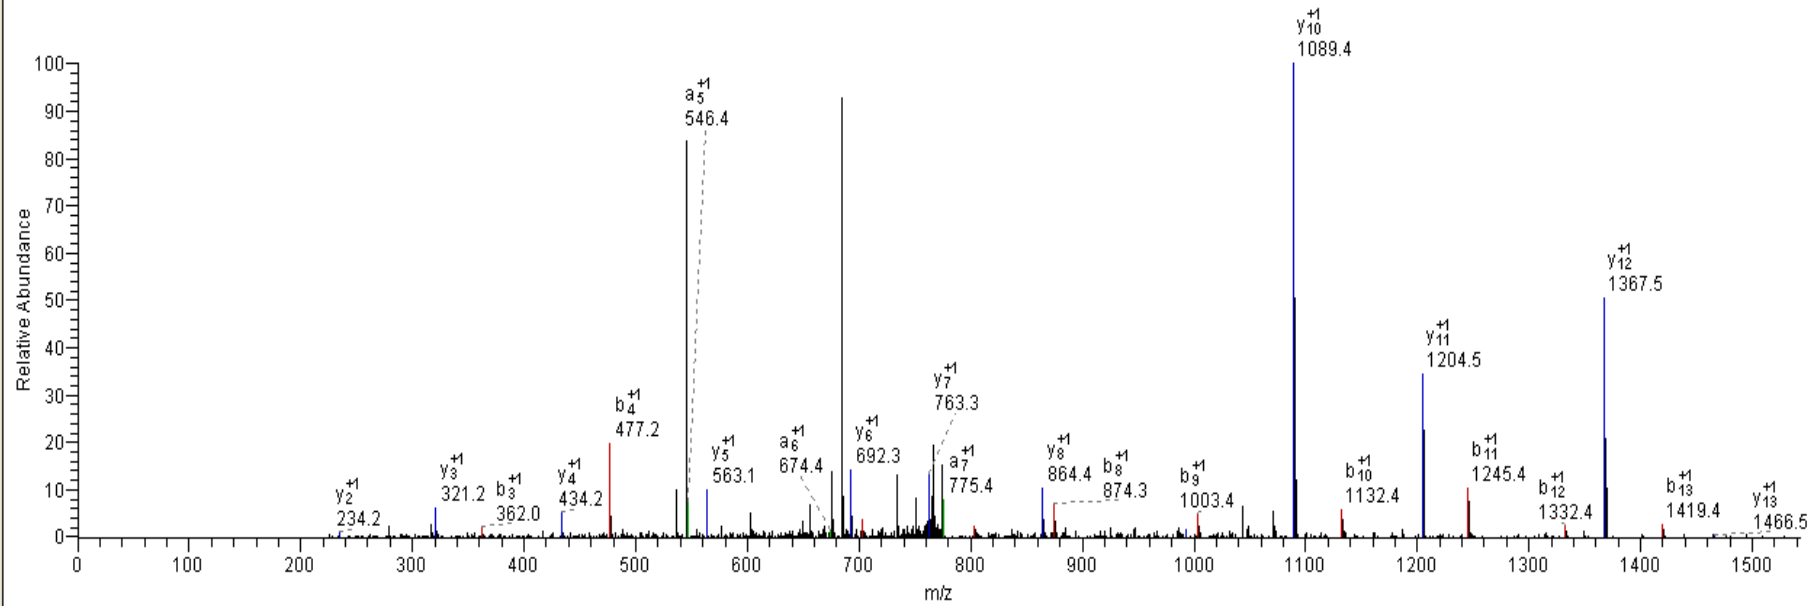



NP\_572548.1 CG12124 CG12124-PA

R.TAVAATAGTNADPNFSISK.L

|    | AA | A       | B       | Y       |    |
|----|----|---------|---------|---------|----|
| 1  | T  | 74.06   | 102.05  | -       | 19 |
| 2  | A  | 145.10  | 173.09  | 1734.87 | 18 |
| 3  | V  | 244.17  | 272.16  | 1663.83 | 17 |
| 4  | A  | 315.20  | 343.20  | 1564.76 | 16 |
| 5  | A  | 386.24  | 414.23  | 1493.72 | 15 |
| 6  | T  | 487.29  | 515.28  | 1422.69 | 14 |
| 7  | A  | 558.32  | 586.32  | 1321.64 | 13 |
| 8  | G  | 615.35  | 643.34  | 1250.60 | 12 |
| 9  | T  | 716.39  | 744.39  | 1193.58 | 11 |
| 10 | N  | 830.44  | 858.43  | 1092.53 | 10 |
| 11 | A  | 901.47  | 929.47  | 978.49  | 9  |
| 12 | D  | 1016.50 | 1044.50 | 907.45  | 8  |
| 13 | P  | 1113.55 | 1141.55 | 792.43  | 7  |
| 14 | N  | 1227.60 | 1255.59 | 695.37  | 6  |
| 15 | F  | 1374.66 | 1402.66 | 581.33  | 5  |
| 16 | S  | 1461.70 | 1489.69 | 434.26  | 4  |
| 17 | I  | 1574.78 | 1602.78 | 347.23  | 3  |
| 18 | S  | 1661.81 | 1689.81 | 234.14  | 2  |
| 19 | K  | -       | -       | 147.11  | 1  |

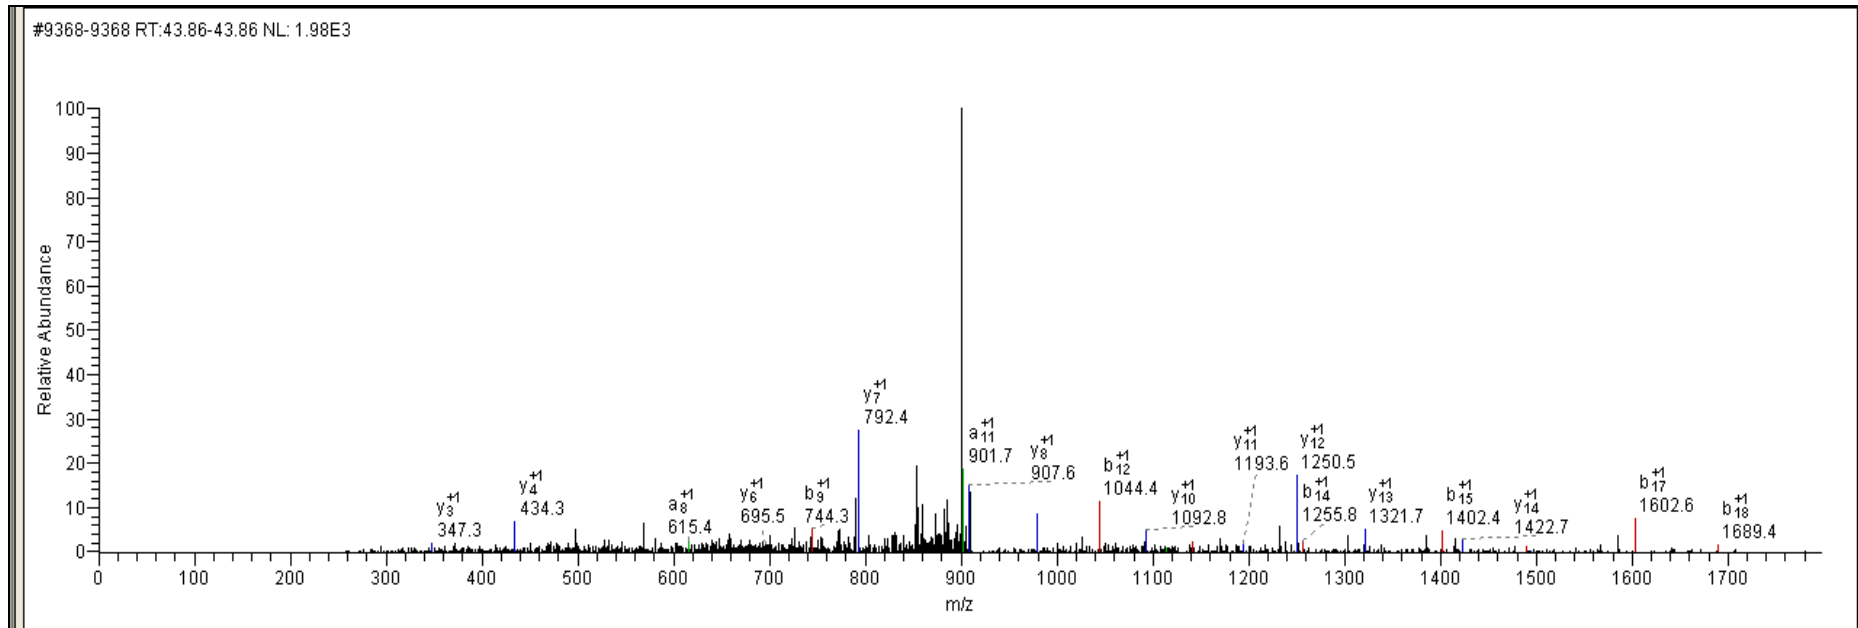

# CG12519 NP\_649114.2

## CG12519 CG12519-PA

### R.NYNGIAAAPVIAPVAAPVVAK.Y

|    | AA | A       | B       | Y       |    |
|----|----|---------|---------|---------|----|
| 1  | N  | 87.06   | 115.05  | -       | 21 |
| 2  | Y  | 250.12  | 278.11  | 1892.10 | 20 |
| 3  | N  | 364.16  | 392.16  | 1729.04 | 19 |
| 4  | G  | 421.18  | 449.18  | 1614.99 | 18 |
| 5  | I  | 534.27  | 562.26  | 1557.97 | 17 |
| 6  | A  | 605.30  | 633.30  | 1444.89 | 16 |
| 7  | A  | 676.34  | 704.34  | 1373.85 | 15 |
| 8  | A  | 747.38  | 775.37  | 1302.81 | 14 |
| 9  | P  | 844.43  | 872.43  | 1231.78 | 13 |
| 10 | V  | 943.50  | 971.49  | 1134.72 | 12 |
| 11 | I  | 1056.58 | 1084.58 | 1035.66 | 11 |
| 12 | A  | 1127.62 | 1155.62 | 922.57  | 10 |
| 13 | P  | 1224.67 | 1252.67 | 851.53  | 9  |
| 14 | V  | 1323.74 | 1351.74 | 754.48  | 8  |
| 15 | A  | 1394.78 | 1422.77 | 655.41  | 7  |
| 16 | A  | 1465.82 | 1493.81 | 584.38  | 6  |
| 17 | P  | 1562.87 | 1590.86 | 513.34  | 5  |
| 18 | V  | 1661.94 | 1689.93 | 416.29  | 4  |
| 19 | V  | 1761.01 | 1789.00 | 317.22  | 3  |
| 20 | A  | 1832.04 | 1860.04 | 218.15  | 2  |
| 21 | K  | -       | -       | 147.11  | 1  |

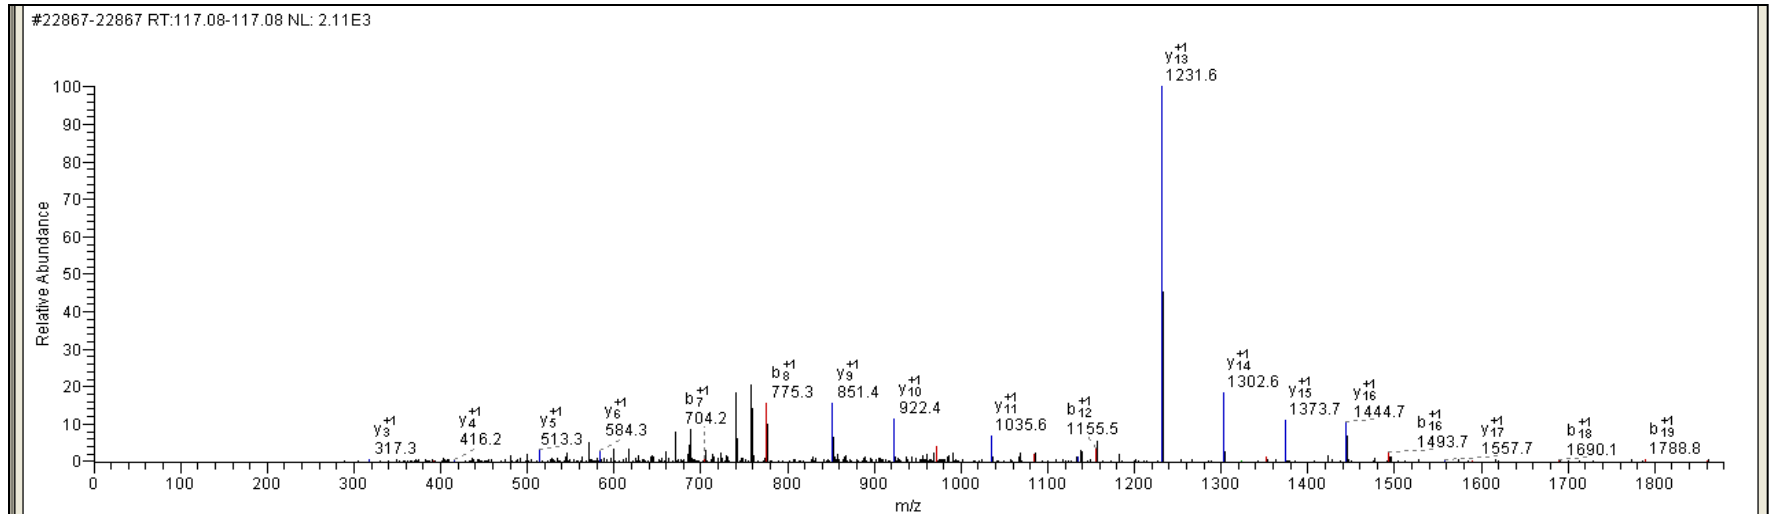

# CG13047 NP\_648862.1 CG13047 CG13047-PA

## R.NNYDGTLSSYTTAPFEFAGPYSSR.Y

| S no | AA | A       | B       | Y       |    |
|------|----|---------|---------|---------|----|
| 1    | N  | 87.06   | 115.05  | -       | 24 |
| 2    | N  | 201.1   | 229.09  | 2531.14 | 23 |
| 3    | Y  | 364.16  | 392.16  | 2417.09 | 22 |
| 4    | D  | 479.19  | 507.18  | 2254.03 | 21 |
| 5    | G  | 536.21  | 564.2   | 2139    | 20 |
| 6    | T  | 637.26  | 665.25  | 2081.98 | 19 |
| 7    | L  | 750.34  | 778.34  | 1980.93 | 18 |
| 8    | S  | 837.37  | 865.37  | 1867.85 | 17 |
| 9    | S  | 924.41  | 952.4   | 1780.82 | 16 |
| 10   | Y  | 1087.47 | 1115.46 | 1693.79 | 15 |
| 11   | T  | 1188.52 | 1216.51 | 1530.72 | 14 |
| 12   | T  | 1289.56 | 1317.56 | 1429.67 | 13 |
| 13   | A  | 1360.6  | 1388.6  | 1328.63 | 12 |
| 14   | P  | 1457.65 | 1485.65 | 1257.59 | 11 |
| 15   | F  | 1604.72 | 1632.72 | 1160.54 | 10 |
| 16   | E  | 1733.77 | 1761.76 | 1013.47 | 9  |
| 17   | F  | 1880.83 | 1908.83 | 884.43  | 8  |
| 18   | A  | 1951.87 | 1979.87 | 737.36  | 7  |
| 19   | G  | 2008.89 | 2036.89 | 666.32  | 6  |
| 20   | P  | 2105.95 | 2133.94 | 609.3   | 5  |
| 21   | Y  | 2269.01 | 2297    | 512.25  | 4  |
| 22   | S  | 2356.04 | 2384.04 | 349.18  | 3  |
| 23   | S  | 2443.07 | 2471.07 | 262.15  | 2  |
| 24   | R  | -       | -       | 175.12  | 1  |

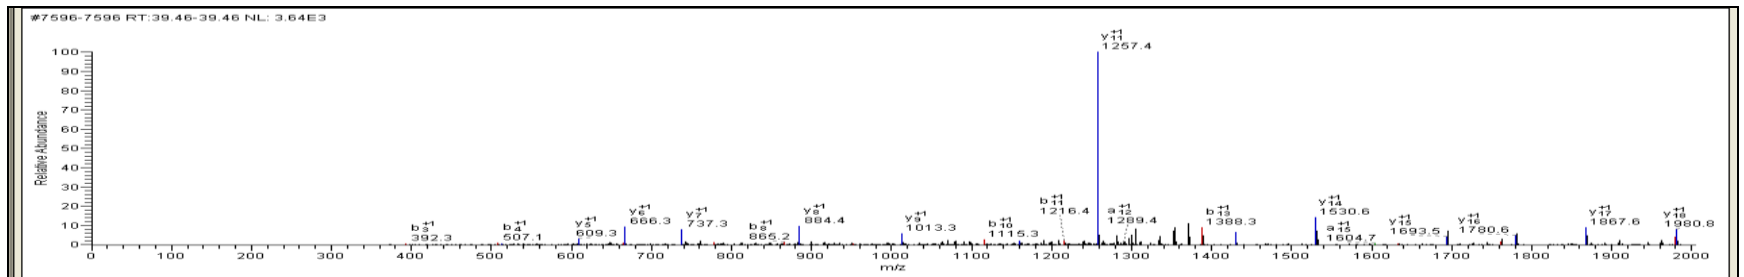

# CG13185 NP\_001097279.1 CG13185 CG13185-PC

## K.LAEIIPQADINPSTLNFVK.S

|    | AA | A       | B       | Y       |    |
|----|----|---------|---------|---------|----|
| 1  | L  | 86.10   | 114.09  | -       | 19 |
| 2  | A  | 157.13  | 185.13  | 1970.06 | 18 |
| 3  | E  | 286.18  | 314.17  | 1899.02 | 17 |
| 4  | I  | 399.26  | 427.26  | 1769.98 | 16 |
| 5  | I  | 512.34  | 540.34  | 1656.90 | 15 |
| 6  | P  | 609.40  | 637.39  | 1543.81 | 14 |
| 7  | Q  | 737.46  | 765.45  | 1446.76 | 13 |
| 8  | A  | 808.49  | 836.49  | 1318.70 | 12 |
| 9  | D  | 923.52  | 951.51  | 1247.66 | 11 |
| 10 | I  | 1036.60 | 1064.60 | 1132.64 | 10 |
| 11 | N  | 1150.65 | 1178.64 | 1019.55 | 9  |
| 12 | P  | 1247.70 | 1275.69 | 905.51  | 8  |
| 13 | S  | 1334.73 | 1362.73 | 808.46  | 7  |
| 14 | T  | 1435.78 | 1463.77 | 721.42  | 6  |
| 15 | L  | 1548.86 | 1576.86 | 620.38  | 5  |
| 16 | N  | 1662.91 | 1690.90 | 507.29  | 4  |
| 17 | F  | 1809.97 | 1837.97 | 393.25  | 3  |
| 18 | V  | 1909.04 | 1937.04 | 246.18  | 2  |
| 19 | K  | -       | -       | 147.11  | 1  |

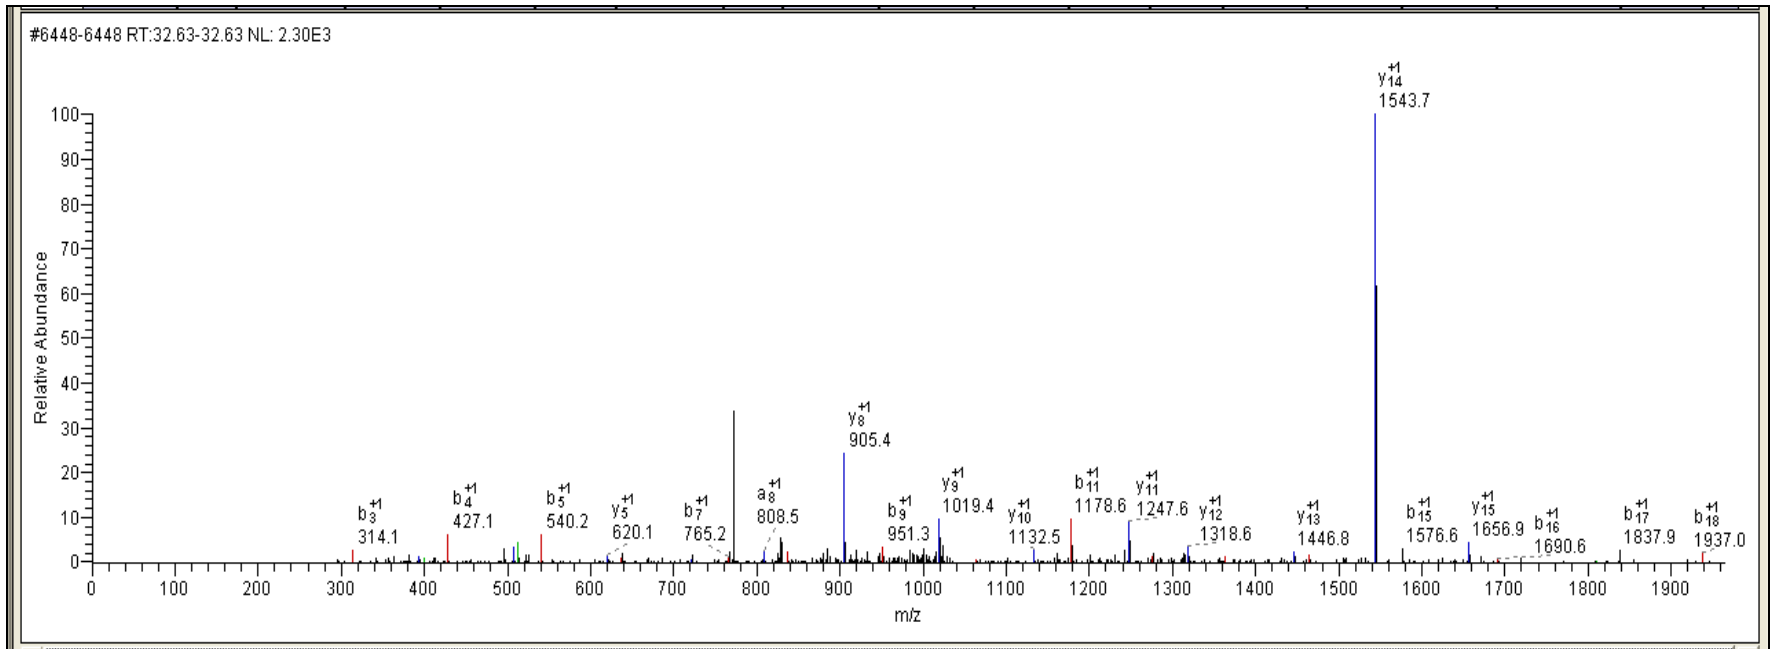

# NP\_569854.1 CG13362 CG13362-PA

## R.EPSGGQILQQIPLTYFR.T

|    | AA | A       | B       | Y       |    |
|----|----|---------|---------|---------|----|
| 1  | E  | 102.05  | 130.05  | -       | 17 |
| 2  | P  | 199.11  | 227.10  | 1817.99 | 16 |
| 3  | S  | 286.14  | 314.13  | 1720.94 | 15 |
| 4  | G  | 343.16  | 371.16  | 1633.91 | 14 |
| 5  | Q  | 400.18  | 428.18  | 1576.88 | 13 |
| 6  | Q  | 528.24  | 556.24  | 1519.86 | 12 |
| 7  | I  | 641.33  | 669.32  | 1391.80 | 11 |
| 8  | L  | 754.41  | 782.40  | 1278.72 | 10 |
| 9  | Q  | 882.47  | 910.46  | 1165.64 | 9  |
| 10 | Q  | 1010.53 | 1038.52 | 1037.58 | 8  |
| 11 | I  | 1123.61 | 1151.61 | 909.52  | 7  |
| 12 | P  | 1220.66 | 1248.66 | 796.44  | 6  |
| 13 | L  | 1333.75 | 1361.74 | 699.38  | 5  |
| 14 | T  | 1434.80 | 1462.79 | 586.30  | 4  |
| 15 | Y  | 1597.86 | 1625.85 | 485.25  | 3  |
| 16 | F  | 1744.93 | 1772.92 | 322.19  | 2  |
| 17 | R  | -       | -       | 175.12  | 1  |

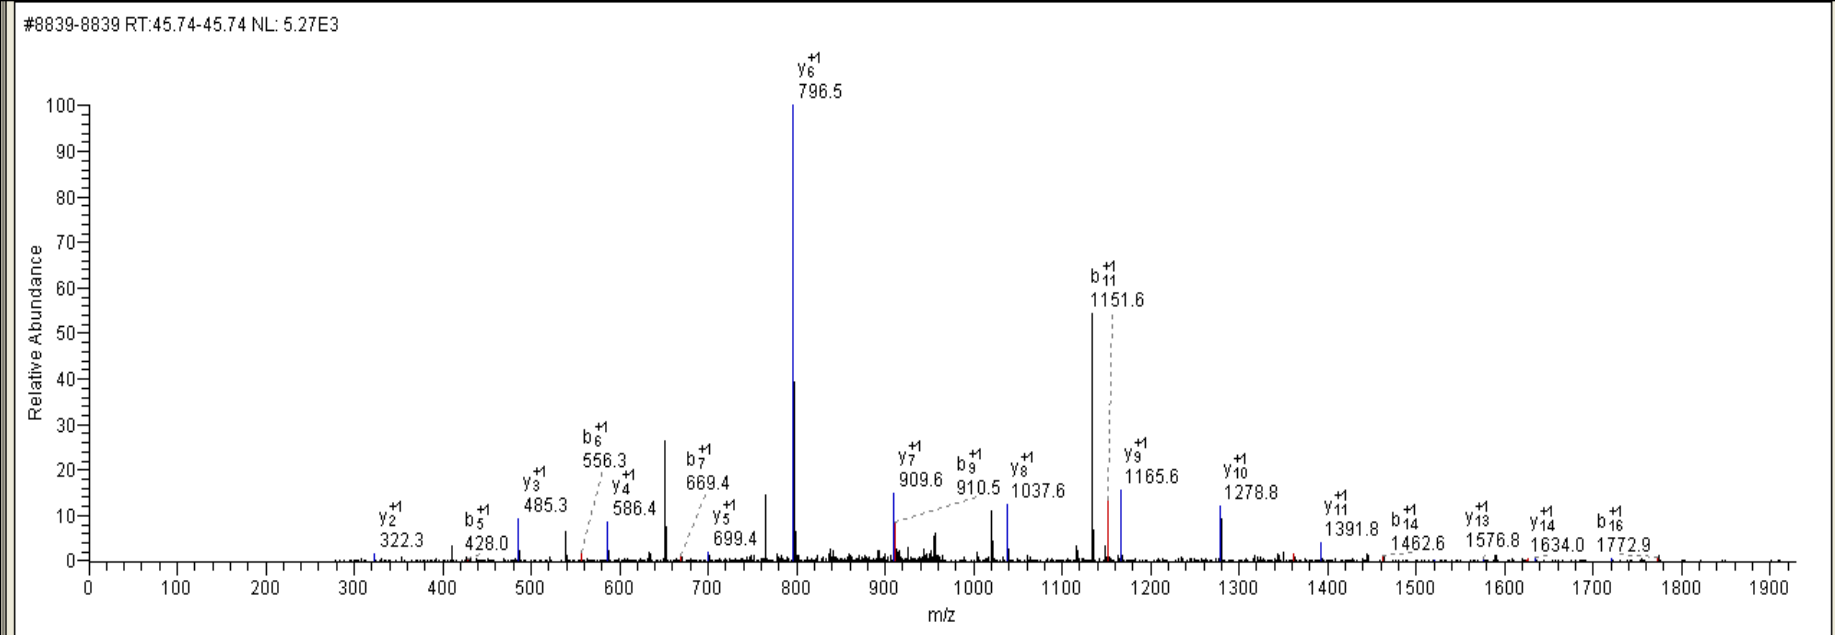

CG13422 NP\_611483.1 CG13422 CG13422-PA

R.NHQLRPGDVLYYWTTAR.Y

|    | AA | A       | B       | Y       |    |
|----|----|---------|---------|---------|----|
| 1  | N  | 87.06   | 115.05  | -       | 17 |
| 2  | H  | 224.11  | 252.11  | 1976.01 | 16 |
| 3  | Q  | 352.17  | 380.17  | 1838.95 | 15 |
| 4  | L  | 465.26  | 493.25  | 1710.90 | 14 |
| 5  | R  | 621.36  | 649.35  | 1597.81 | 13 |
| 6  | P  | 718.41  | 746.41  | 1441.71 | 12 |
| 7  | G  | 775.43  | 803.43  | 1344.66 | 11 |
| 8  | D  | 890.46  | 918.45  | 1287.64 | 10 |
| 9  | V  | 989.53  | 1017.52 | 1172.61 | 9  |
| 10 | L  | 1102.61 | 1130.61 | 1073.54 | 8  |
| 11 | Y  | 1265.67 | 1293.67 | 960.46  | 7  |
| 12 | Y  | 1428.74 | 1456.73 | 797.39  | 6  |
| 13 | W  | 1614.82 | 1642.81 | 634.33  | 5  |
| 14 | T  | 1715.87 | 1743.86 | 448.25  | 4  |
| 15 | T  | 1816.91 | 1844.91 | 347.20  | 3  |
| 16 | A  | 1887.95 | 1915.94 | 246.16  | 2  |
| 17 | R  | -       | -       | 175.12  | 1  |

#7771-7773 RT:40.11-40.12 NL: 1.33E4

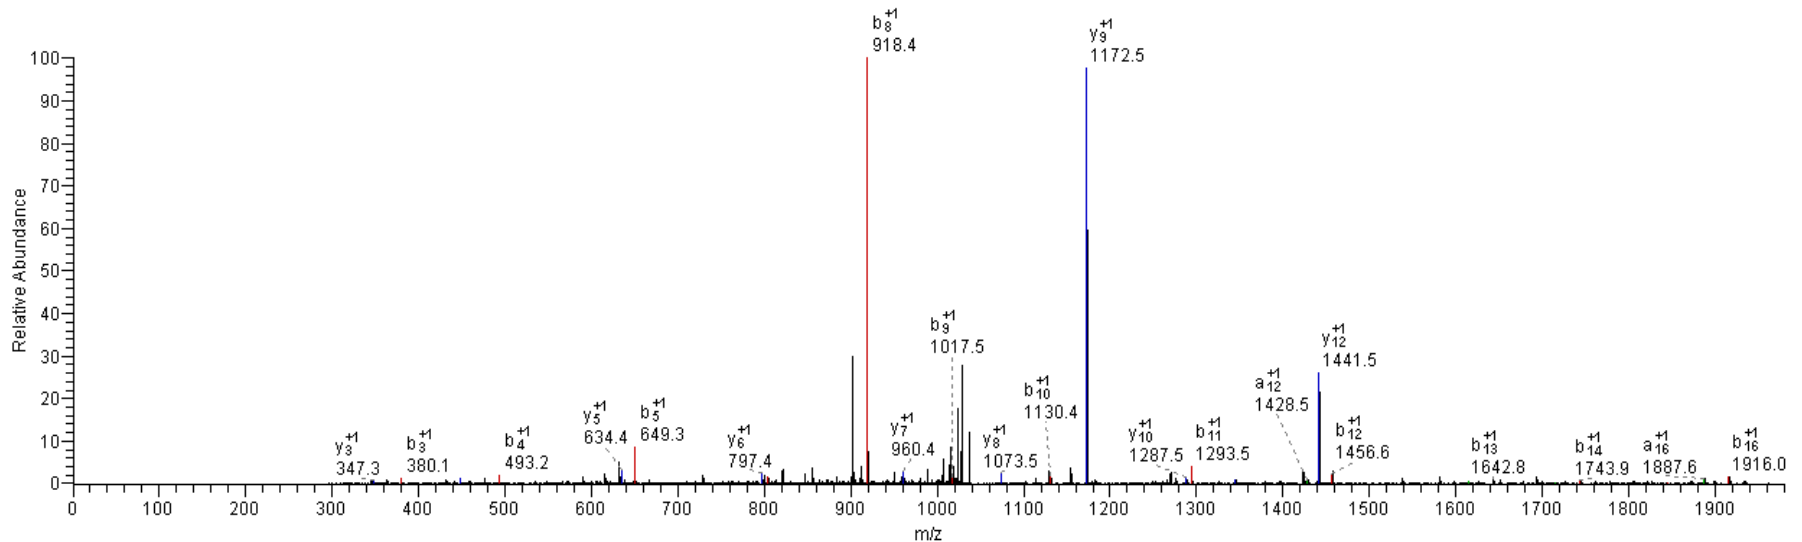

# NP\_651069.1 CG13843 CG13843-PA

## K.YKPCWQHPLNVQDQTR.F

|    | AA | A       | B       | Y       |    |
|----|----|---------|---------|---------|----|
| 1  | Y  | 136.08  | 164.07  | -       | 16 |
| 2  | K  | 264.17  | 292.17  | 1849.91 | 15 |
| 3  | P  | 361.22  | 389.22  | 1721.82 | 14 |
| 4  | C  | 464.23  | 492.23  | 1624.76 | 13 |
| 5  | W  | 650.31  | 678.31  | 1521.76 | 12 |
| 6  | Q  | 778.37  | 806.37  | 1335.68 | 11 |
| 7  | H  | 915.43  | 943.42  | 1207.62 | 10 |
| 8  | P  | 1012.48 | 1040.48 | 1070.56 | 9  |
| 9  | L  | 1125.57 | 1153.56 | 973.51  | 8  |
| 10 | N  | 1239.61 | 1267.60 | 860.42  | 7  |
| 11 | V  | 1338.68 | 1366.67 | 746.38  | 6  |
| 12 | Q  | 1466.74 | 1494.73 | 647.31  | 5  |
| 13 | D  | 1581.76 | 1609.76 | 519.25  | 4  |
| 14 | Q  | 1709.82 | 1737.82 | 404.23  | 3  |
| 15 | T  | 1810.87 | 1838.86 | 276.17  | 2  |
| 16 | R  | -       | -       | 175.12  | 1  |

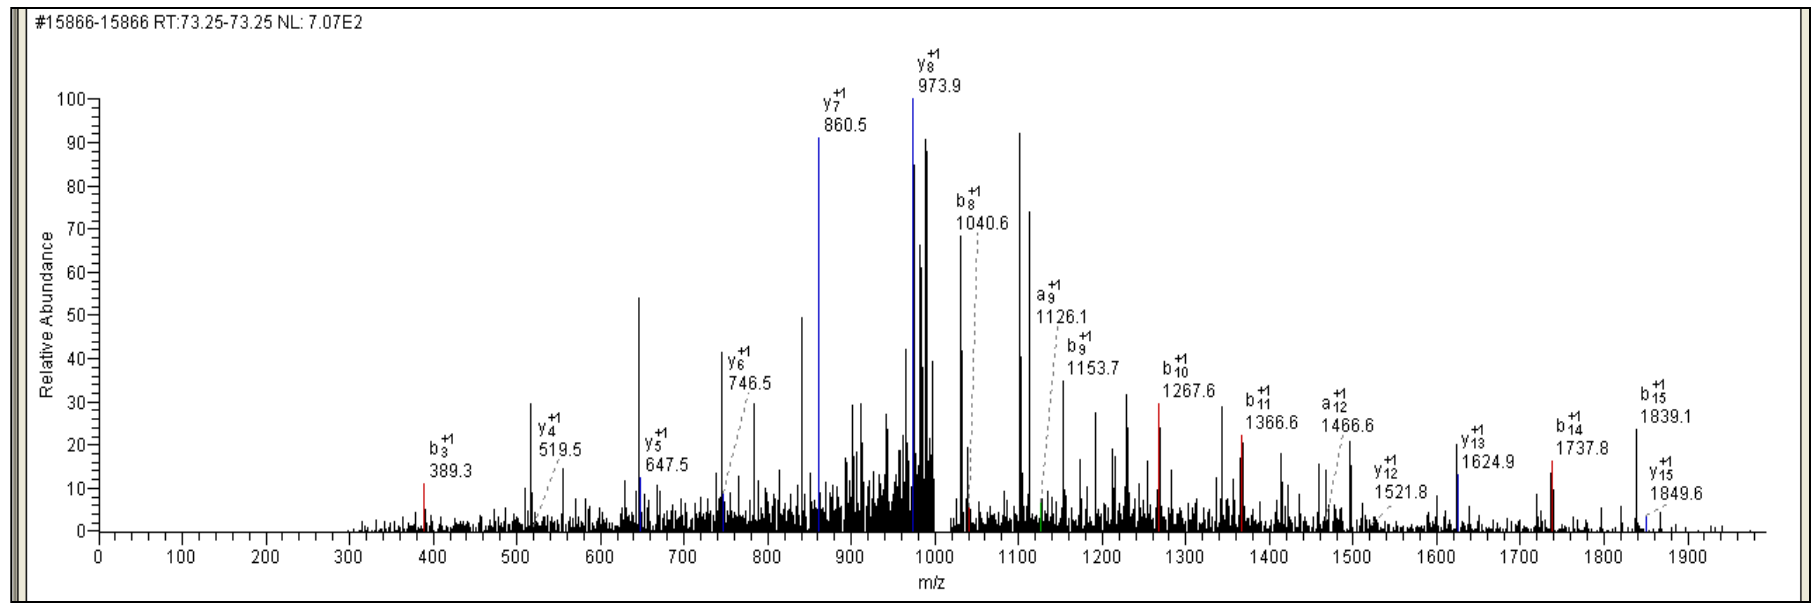

# CG13933 NP\_647658.1 CG13933 CG13933-PA

## R.MLLQHGANPNC SYRANLK.P

|    | AA | A       | B       | Y       |    |
|----|----|---------|---------|---------|----|
| 1  | M* | 120.05  | 148.04  | -       | 18 |
| 2  | L  | 233.13  | 261.13  | 1898.97 | 17 |
| 3  | L  | 346.22  | 374.21  | 1785.88 | 16 |
| 4  | Q  | 474.27  | 502.27  | 1672.80 | 15 |
| 5  | H  | 611.33  | 639.33  | 1544.74 | 14 |
| 6  | G  | 668.35  | 696.35  | 1407.68 | 13 |
| 7  | A  | 739.39  | 767.39  | 1350.66 | 12 |
| 8  | N  | 853.43  | 881.43  | 1279.62 | 11 |
| 9  | P  | 950.49  | 978.48  | 1165.58 | 10 |
| 10 | N  | 1064.53 | 1092.53 | 1068.53 | 9  |
| 11 | C  | 1167.54 | 1195.53 | 954.48  | 8  |
| 12 | S  | 1254.57 | 1282.57 | 851.47  | 7  |
| 13 | Y  | 1417.64 | 1445.63 | 764.44  | 6  |
| 14 | R  | 1573.74 | 1601.73 | 601.38  | 5  |
| 15 | A  | 1644.77 | 1672.77 | 445.28  | 4  |
| 16 | N  | 1758.82 | 1786.81 | 374.24  | 3  |
| 17 | L  | 1871.90 | 1899.90 | 260.20  | 2  |
| 18 | K  | -       | -       | 147.11  | 1  |

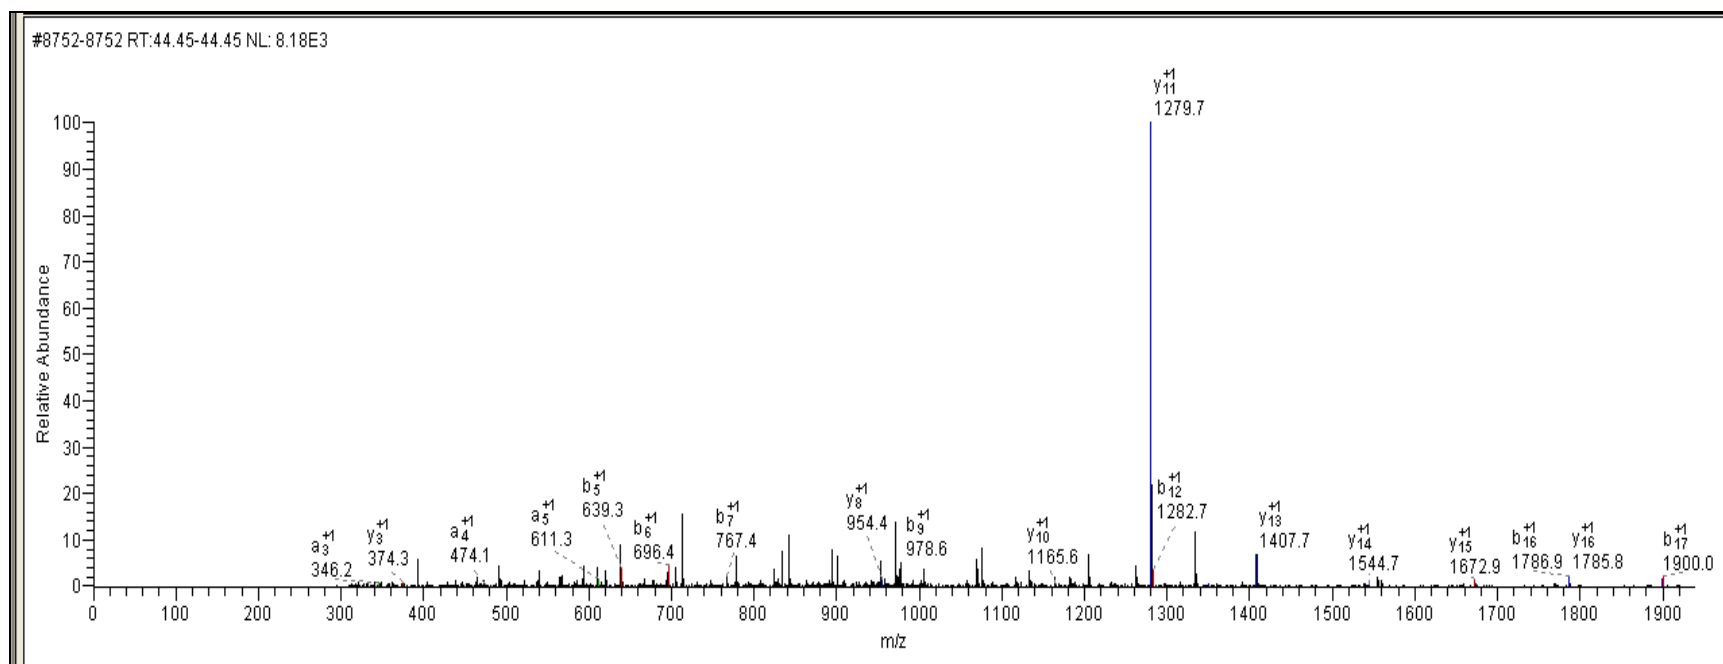



CG14096 NP\_649113.1 CG14096 CG14096-PA

K.YTAAPFAYASPLAYSAPLAYTSPLAYK.T

| S no | AA | A       | B       | Y       |    |
|------|----|---------|---------|---------|----|
| 1    | Y  | 136.08  | 164.07  | -       | 27 |
| 2    | T  | 237.12  | 265.12  | 2705.39 | 26 |
| 3    | A  | 308.16  | 336.16  | 2604.34 | 25 |
| 4    | A  | 379.2   | 407.19  | 2533.3  | 24 |
| 5    | P  | 476.25  | 504.25  | 2462.26 | 23 |
| 6    | F  | 623.32  | 651.31  | 2365.21 | 22 |
| 7    | A  | 694.36  | 722.35  | 2218.14 | 21 |
| 8    | Y  | 857.42  | 885.41  | 2147.11 | 20 |
| 9    | A  | 928.46  | 956.45  | 1984.04 | 19 |
| 10   | S  | 1015.49 | 1043.48 | 1913.01 | 18 |
| 11   | P  | 1112.54 | 1140.54 | 1825.97 | 17 |
| 12   | L  | 1225.63 | 1253.62 | 1728.92 | 16 |
| 13   | A  | 1296.66 | 1324.66 | 1615.84 | 15 |
| 14   | Y  | 1459.73 | 1487.72 | 1544.8  | 14 |
| 15   | S  | 1546.76 | 1574.75 | 1381.74 | 13 |
| 16   | A  | 1617.79 | 1645.79 | 1294.7  | 12 |
| 17   | P  | 1714.85 | 1742.84 | 1223.67 | 11 |
| 18   | L  | 1827.93 | 1855.93 | 1126.61 | 10 |
| 19   | A  | 1898.97 | 1926.96 | 1013.53 | 9  |
| 20   | Y  | 2062.03 | 2090.03 | 942.49  | 8  |
| 21   | T  | 2163.08 | 2191.07 | 779.43  | 7  |
| 22   | S  | 2250.11 | 2278.11 | 678.38  | 6  |
| 23   | P  | 2347.16 | 2375.16 | 591.35  | 5  |
| 24   | L  | 2460.25 | 2488.24 | 494.3   | 4  |
| 25   | A  | 2531.29 | 2559.28 | 381.21  | 3  |
| 26   | Y  | 2694.35 | 2722.34 | 310.18  | 2  |
| 27   | K  | -       | -       | 147.11  | 1  |

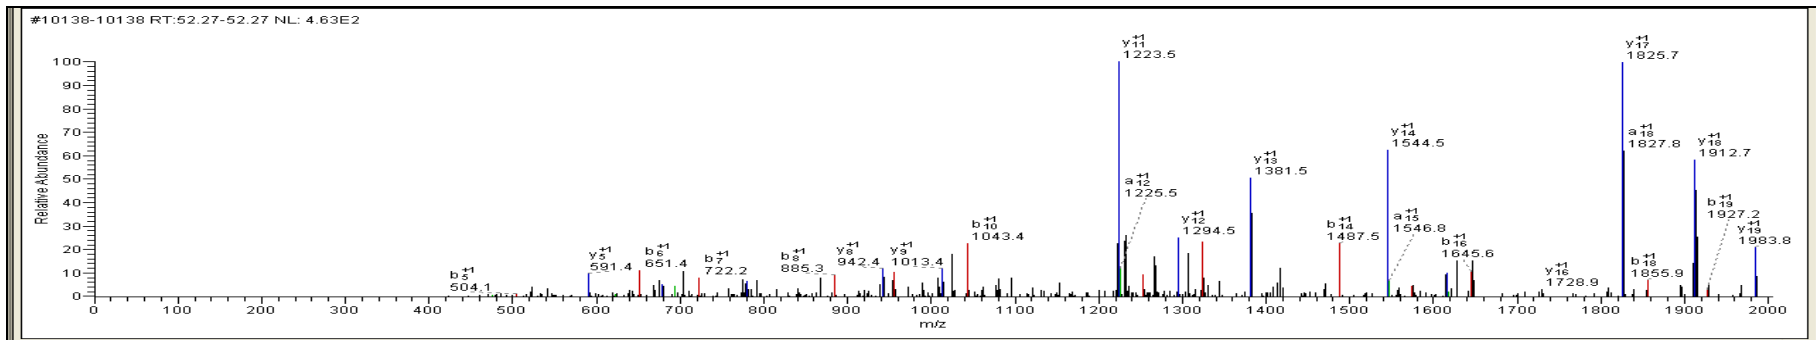

# CG14207 NP\_608326.1 CG14207 CG14207-PA

## R.EANFFESTSSTTNSALPSR.I

|    | AA | A       | B       | Y       |    |
|----|----|---------|---------|---------|----|
| 1  | E  | 102.05  | 130.05  | -       | 19 |
| 2  | A  | 173.09  | 201.09  | 1916.90 | 18 |
| 3  | N  | 287.13  | 315.13  | 1845.86 | 17 |
| 4  | F  | 434.20  | 462.20  | 1731.82 | 16 |
| 5  | F  | 581.27  | 609.27  | 1584.75 | 15 |
| 6  | E  | 710.31  | 738.31  | 1437.68 | 14 |
| 7  | S  | 797.35  | 825.34  | 1308.64 | 13 |
| 8  | T  | 898.39  | 926.39  | 1221.61 | 12 |
| 9  | S  | 985.43  | 1013.42 | 1120.56 | 11 |
| 10 | S  | 1072.46 | 1100.45 | 1033.53 | 10 |
| 11 | T  | 1173.51 | 1201.50 | 946.50  | 9  |
| 12 | T  | 1274.55 | 1302.55 | 845.45  | 8  |
| 13 | N  | 1388.60 | 1416.59 | 744.40  | 7  |
| 14 | S  | 1475.63 | 1503.62 | 630.36  | 6  |
| 15 | A  | 1546.67 | 1574.66 | 543.32  | 5  |
| 16 | L  | 1659.75 | 1687.74 | 472.29  | 4  |
| 17 | P  | 1756.80 | 1784.80 | 359.20  | 3  |
| 18 | S  | 1843.83 | 1871.83 | 262.15  | 2  |
| 19 | R  | -       | -       | 175.12  | 1  |

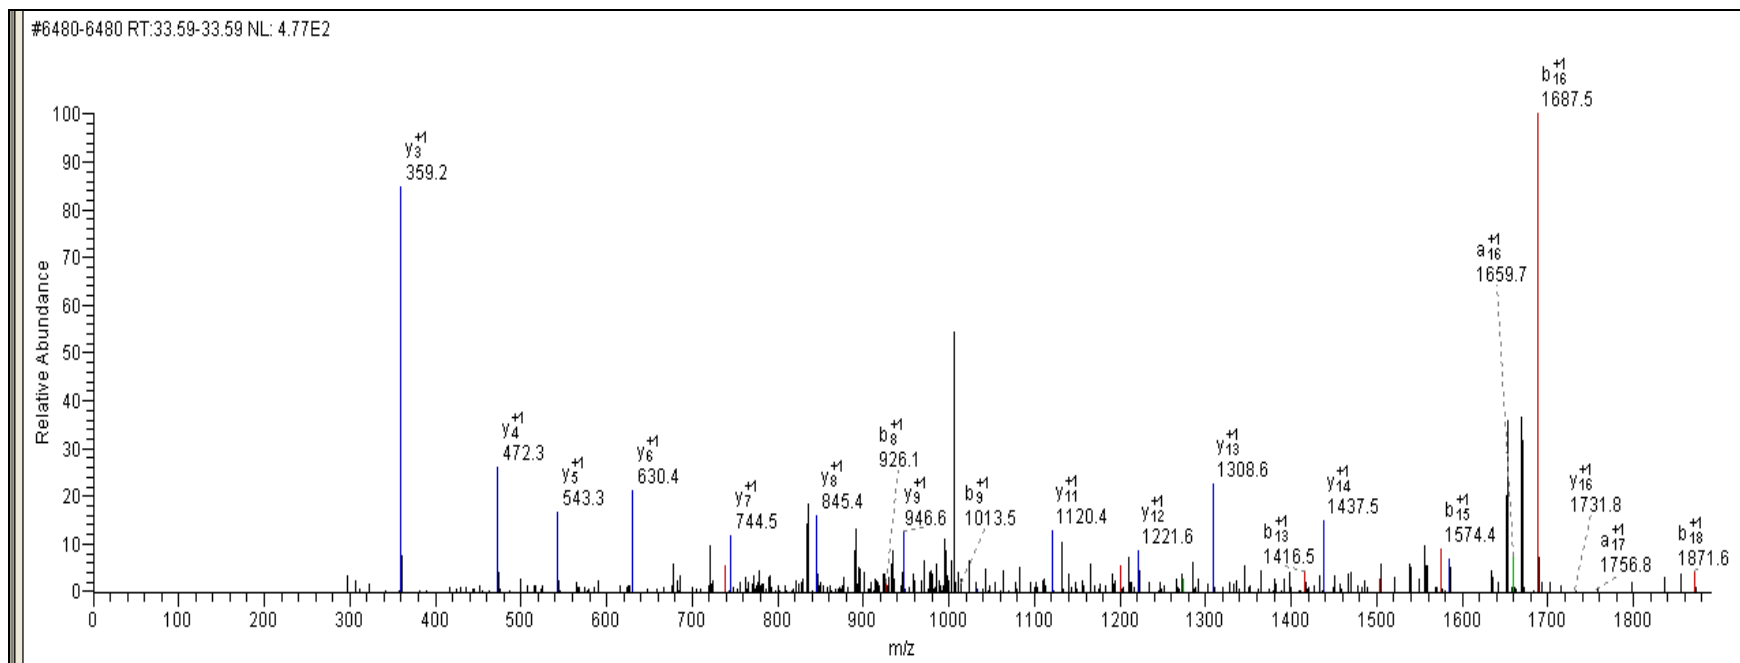

# CG1600 NP\_610293.3 CG1600 CG1600-PC

## R.VIVYPFDETPAGYAELLVVPDLK.H

| S no | AA | A       | B       | Y       |    |
|------|----|---------|---------|---------|----|
| 1    | V  | 72.08   | 100.08  | -       | 23 |
| 2    | I  | 185.16  | 213.16  | 2449.29 | 22 |
| 3    | V  | 284.23  | 312.23  | 2336.21 | 21 |
| 4    | Y  | 447.3   | 475.29  | 2237.14 | 20 |
| 5    | P  | 544.35  | 572.34  | 2074.07 | 19 |
| 6    | F  | 691.42  | 719.41  | 1977.02 | 18 |
| 7    | D  | 806.44  | 834.44  | 1829.95 | 17 |
| 8    | E  | 935.49  | 963.48  | 1714.93 | 16 |
| 9    | T  | 1036.53 | 1064.53 | 1585.88 | 15 |
| 10   | P  | 1133.59 | 1161.58 | 1484.84 | 14 |
| 11   | A  | 1204.62 | 1232.62 | 1387.78 | 13 |
| 12   | G  | 1261.65 | 1289.64 | 1316.75 | 12 |
| 13   | Y  | 1424.71 | 1452.7  | 1259.72 | 11 |
| 14   | A  | 1495.75 | 1523.74 | 1096.66 | 10 |
| 15   | E  | 1624.79 | 1652.78 | 1025.62 | 9  |
| 16   | L  | 1737.87 | 1765.87 | 896.58  | 8  |
| 17   | L  | 1850.96 | 1878.95 | 783.5   | 7  |
| 18   | V  | 1950.03 | 1978.02 | 670.41  | 6  |
| 19   | V  | 2049.09 | 2077.09 | 571.34  | 5  |
| 20   | P  | 2146.15 | 2174.14 | 472.28  | 4  |
| 21   | D  | 2261.17 | 2289.17 | 375.22  | 3  |
| 22   | L  | 2374.26 | 2402.25 | 260.2   | 2  |
| 23   | K  | -       | -       | 147.11  | 1  |

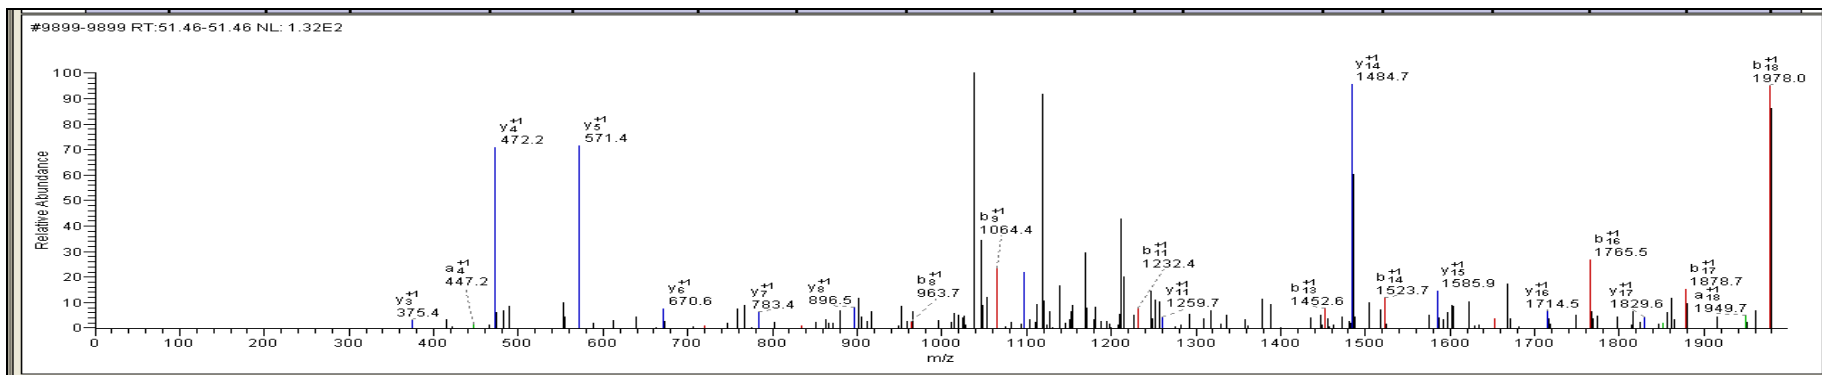

# CG1620 NP\_610287.2 CG1620 CG1620-PA

## R.EESEMPIEELLAK.Y

|    | AA | A       | B       | Y       |    |
|----|----|---------|---------|---------|----|
| 1  | E  | 102.05  | 130.05  | -       | 13 |
| 2  | E  | 231.10  | 259.09  | 1388.70 | 12 |
| 3  | S  | 318.13  | 346.12  | 1259.66 | 11 |
| 4  | E  | 447.17  | 475.17  | 1172.62 | 10 |
| 5  | M  | 578.21  | 606.21  | 1043.58 | 9  |
| 6  | P  | 675.27  | 703.26  | 912.54  | 8  |
| 7  | I  | 788.35  | 816.34  | 815.49  | 7  |
| 8  | E  | 917.39  | 945.39  | 702.40  | 6  |
| 9  | E  | 1046.43 | 1074.43 | 573.36  | 5  |
| 10 | L  | 1159.52 | 1187.51 | 444.32  | 4  |
| 11 | L  | 1272.60 | 1300.60 | 331.23  | 3  |
| 12 | A  | 1343.64 | 1371.63 | 218.15  | 2  |
| 13 | K  | -       | -       | 147.11  | 1  |

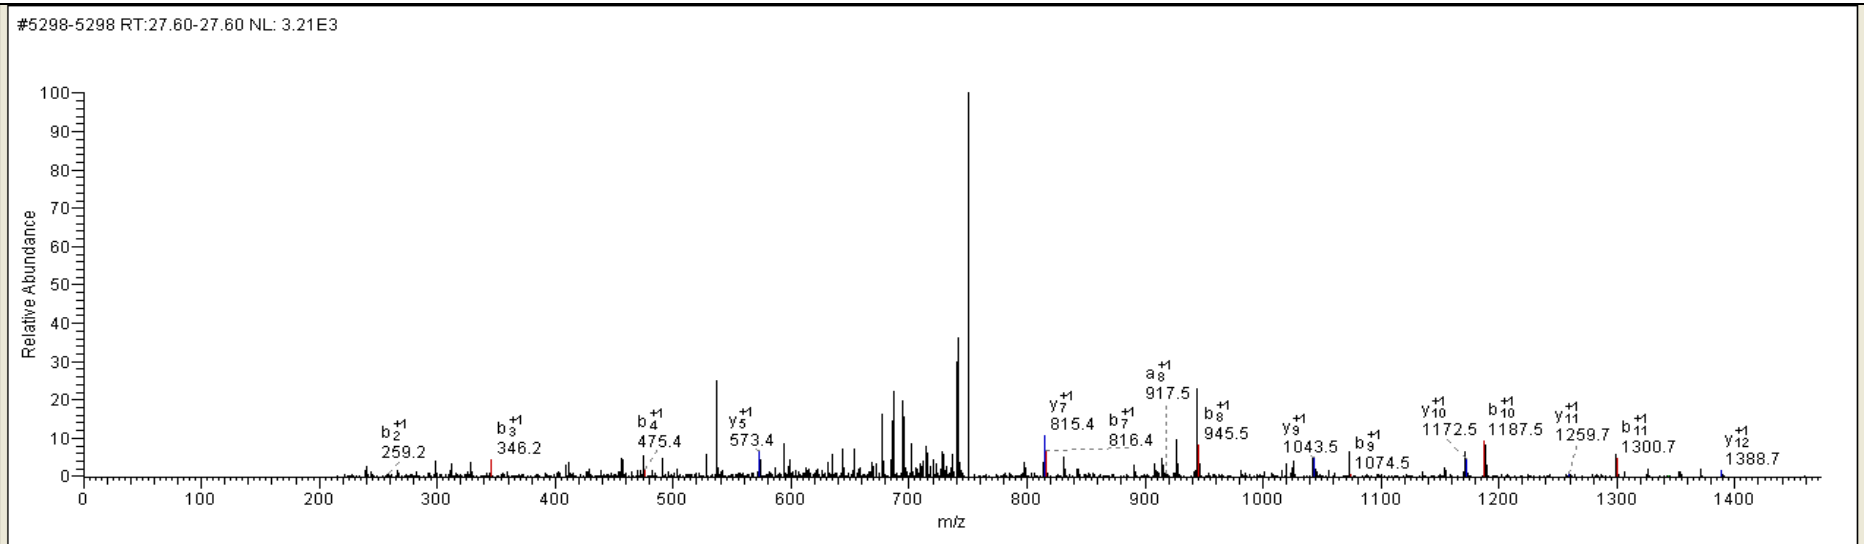

# CG16903 NP\_569980.1 CG16903 CG16903-PA

## R.DVINVFHHIK.Q

|    | AA | A       | B       | Y       |    |
|----|----|---------|---------|---------|----|
| 1  | D  | 88.04   | 116.03  | -       | 10 |
| 2  | V  | 187.11  | 215.10  | 1106.65 | 9  |
| 3  | I  | 300.19  | 328.19  | 1007.58 | 8  |
| 4  | N  | 414.23  | 442.23  | 894.49  | 7  |
| 5  | V  | 513.30  | 541.30  | 780.45  | 6  |
| 6  | F  | 660.37  | 688.37  | 681.38  | 5  |
| 7  | H  | 797.43  | 825.43  | 534.31  | 4  |
| 8  | H  | 934.49  | 962.48  | 397.26  | 3  |
| 9  | I  | 1047.57 | 1075.57 | 260.20  | 2  |
| 10 | K  | -       | -       | 147.11  | 1  |

#10466-10466 RT:48.81-48.81 NL: 8.18E2

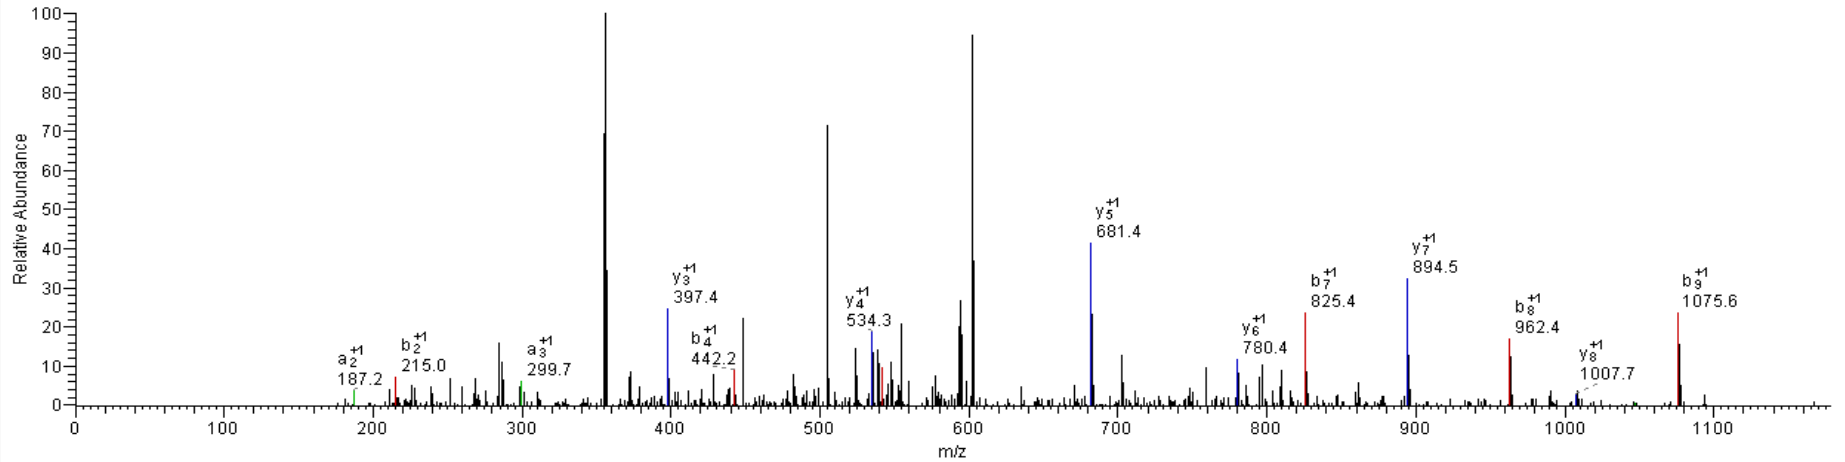

# CG17122 NP\_730506.1 CG17122 CG17122-PA

## K.EMEEQYSALDQIK.N

|    | AA | A       | B       | Y       |    |
|----|----|---------|---------|---------|----|
| 1  | E  | 102.05  | 130.05  | -       | 13 |
| 2  | M  | 233.10  | 261.09  | 1454.68 | 12 |
| 3  | E  | 362.14  | 390.13  | 1323.64 | 11 |
| 4  | E  | 491.18  | 519.18  | 1194.60 | 10 |
| 5  | Q  | 619.24  | 647.23  | 1065.56 | 9  |
| 6  | Y  | 782.30  | 810.30  | 937.50  | 8  |
| 7  | S  | 869.33  | 897.33  | 774.44  | 7  |
| 8  | A  | 940.37  | 968.37  | 687.40  | 6  |
| 9  | L  | 1053.46 | 1081.45 | 616.37  | 5  |
| 10 | D  | 1168.48 | 1196.48 | 503.28  | 4  |
| 11 | Q  | 1296.54 | 1324.54 | 388.26  | 3  |
| 12 | I  | 1409.63 | 1437.62 | 260.20  | 2  |
| 13 | K  | -       | -       | 147.11  | 1  |

#7738-7739 RT:40.46-40.46 NL: 1.84E4

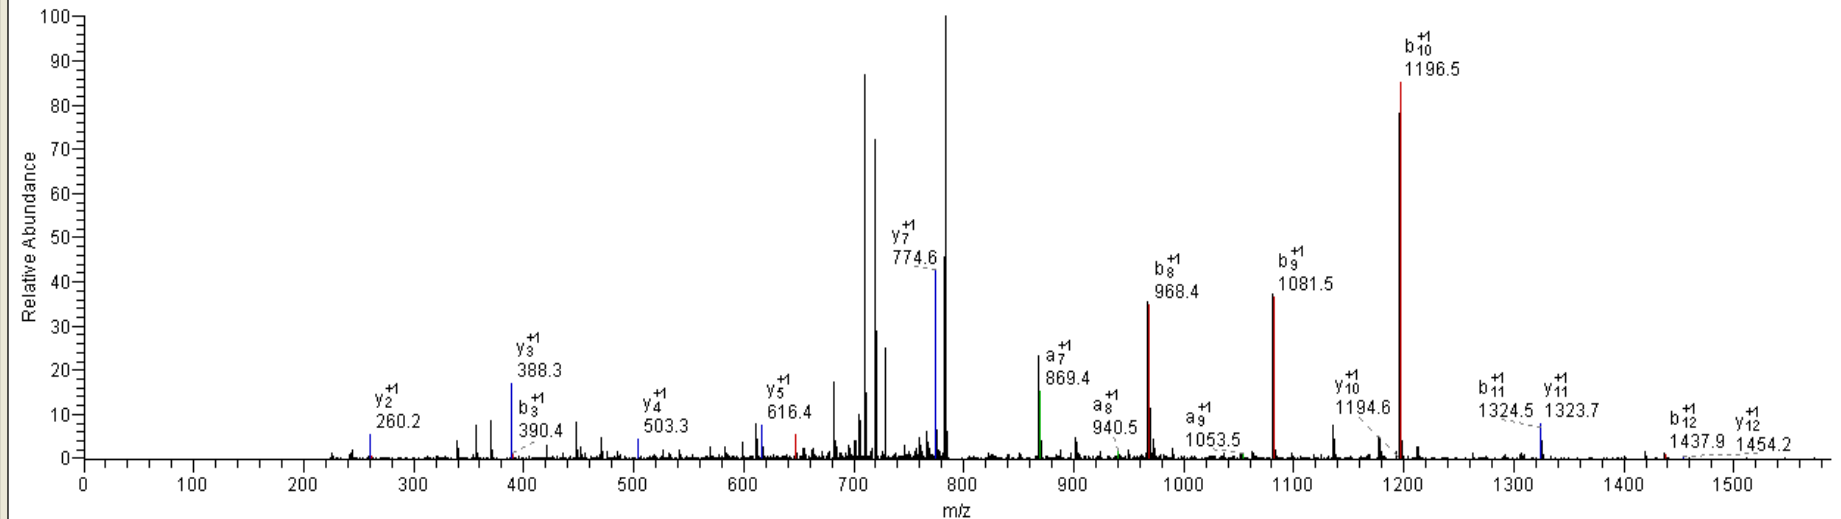

# levy NP\_611805.1 CG17280 CG17280-PA

## K.SLFHNP HVNALPDGYEH

|    | AA | A       | B       | Y       |    |
|----|----|---------|---------|---------|----|
| 1  | S  | 60.04   | 88.04   | -       | 17 |
| 2  | L  | 173.13  | 201.12  | 1859.88 | 16 |
| 3  | F  | 320.20  | 348.19  | 1746.80 | 15 |
| 4  | H  | 457.26  | 485.25  | 1599.73 | 14 |
| 5  | N  | 571.30  | 599.29  | 1462.67 | 13 |
| 6  | P  | 668.35  | 696.35  | 1348.63 | 12 |
| 7  | H  | 805.41  | 833.41  | 1251.58 | 11 |
| 8  | V  | 904.48  | 932.47  | 1114.52 | 10 |
| 9  | N  | 1018.52 | 1046.52 | 1015.45 | 9  |
| 10 | A  | 1089.56 | 1117.55 | 901.41  | 8  |
| 11 | L  | 1202.64 | 1230.64 | 830.37  | 7  |
| 12 | P  | 1299.70 | 1327.69 | 717.28  | 6  |
| 13 | D  | 1414.72 | 1442.72 | 620.23  | 5  |
| 14 | G  | 1471.74 | 1499.74 | 505.20  | 4  |
| 15 | Y  | 1634.81 | 1662.80 | 448.18  | 3  |
| 16 | E  | 1763.85 | 1791.84 | 285.12  | 2  |
| 17 | H  | -       | -       | 156.08  | 1  |

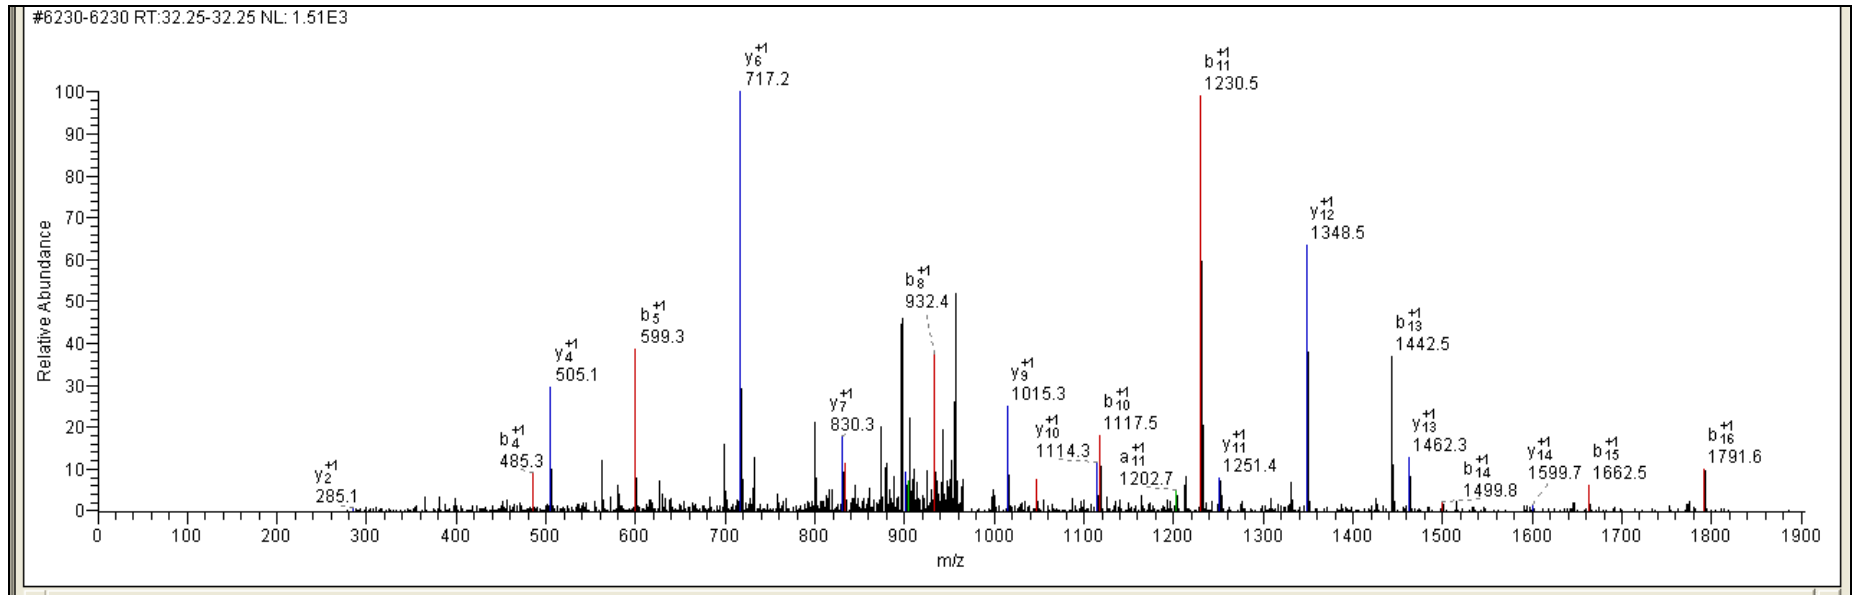

# CG17514 NP\_001015316.1 CG17514 CG17514-PA

## R.YSSVQLLGDLLYR.I

|    | AA | A       | B       | Y       |    |
|----|----|---------|---------|---------|----|
| 1  | Y  | 136.08  | 164.07  | -       | 13 |
| 2  | S  | 223.11  | 251.10  | 1363.76 | 12 |
| 3  | S  | 310.14  | 338.13  | 1276.73 | 11 |
| 4  | V  | 409.21  | 437.20  | 1189.69 | 10 |
| 5  | Q  | 537.27  | 565.26  | 1090.63 | 9  |
| 6  | L  | 650.35  | 678.35  | 962.57  | 8  |
| 7  | L  | 763.43  | 791.43  | 849.48  | 7  |
| 8  | G  | 820.46  | 848.45  | 736.40  | 6  |
| 9  | D  | 935.48  | 963.48  | 679.38  | 5  |
| 10 | L  | 1048.57 | 1076.56 | 564.35  | 4  |
| 11 | L  | 1161.65 | 1189.65 | 451.27  | 3  |
| 12 | Y  | 1324.71 | 1352.71 | 338.18  | 2  |
| 13 | R  | -       | -       | 175.12  | 1  |

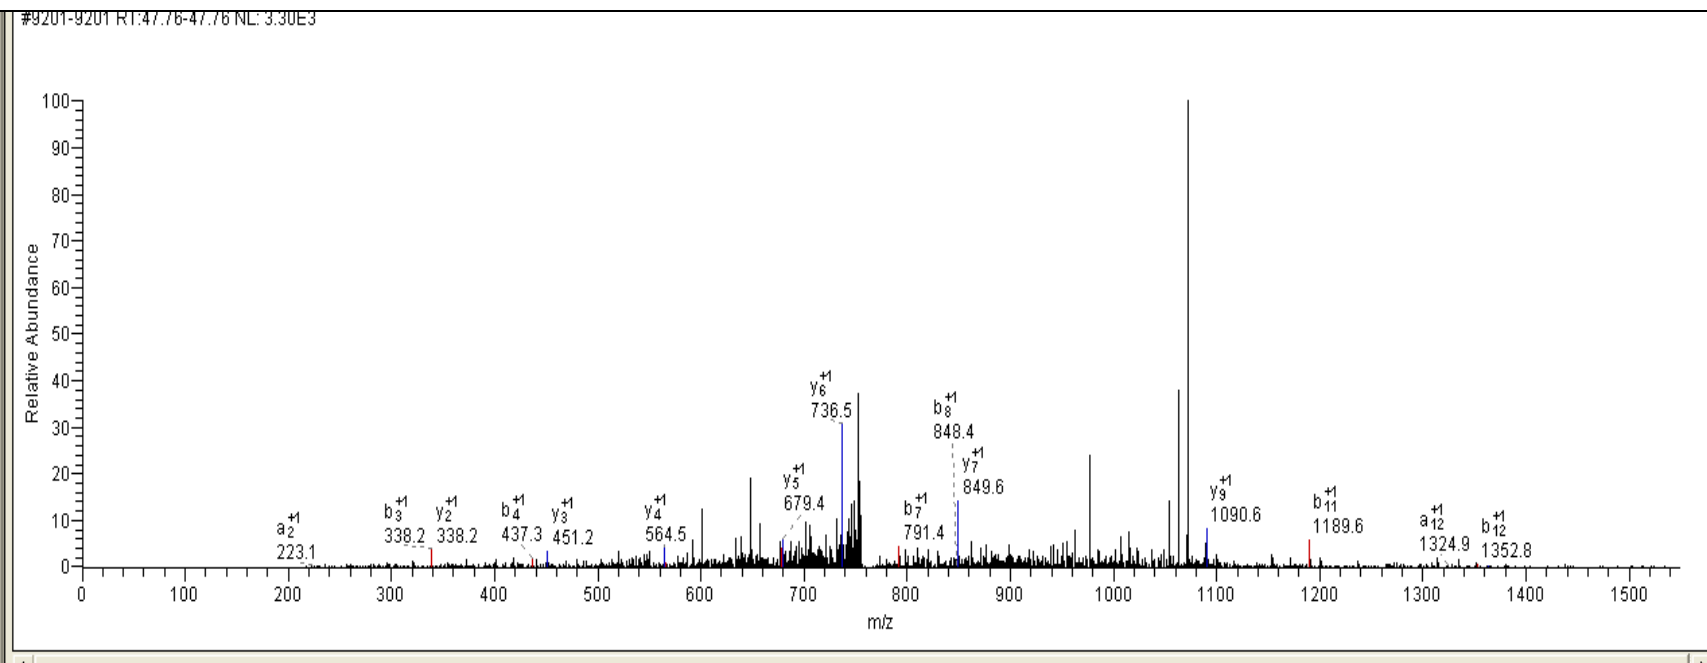



# CG17838 NP\_732557.2 CG17838 CG17838-PA

## K.INISVPNLR.L

|   | AA | A      | B      | Y      |   |
|---|----|--------|--------|--------|---|
| 1 | I  | 86.10  | 114.09 | -      | 9 |
| 2 | N  | 200.14 | 228.13 | 912.53 | 8 |
| 3 | I  | 313.22 | 341.22 | 798.48 | 7 |
| 4 | S  | 400.26 | 428.25 | 685.40 | 6 |
| 5 | V  | 499.32 | 527.32 | 598.37 | 5 |
| 6 | P  | 596.38 | 624.37 | 499.30 | 4 |
| 7 | N  | 710.42 | 738.41 | 402.25 | 3 |
| 8 | L  | 823.50 | 851.50 | 288.20 | 2 |
| 9 | R  | -      | -      | 175.12 | 1 |
|   |    |        |        |        |   |
|   |    |        |        |        |   |
|   |    |        |        |        |   |

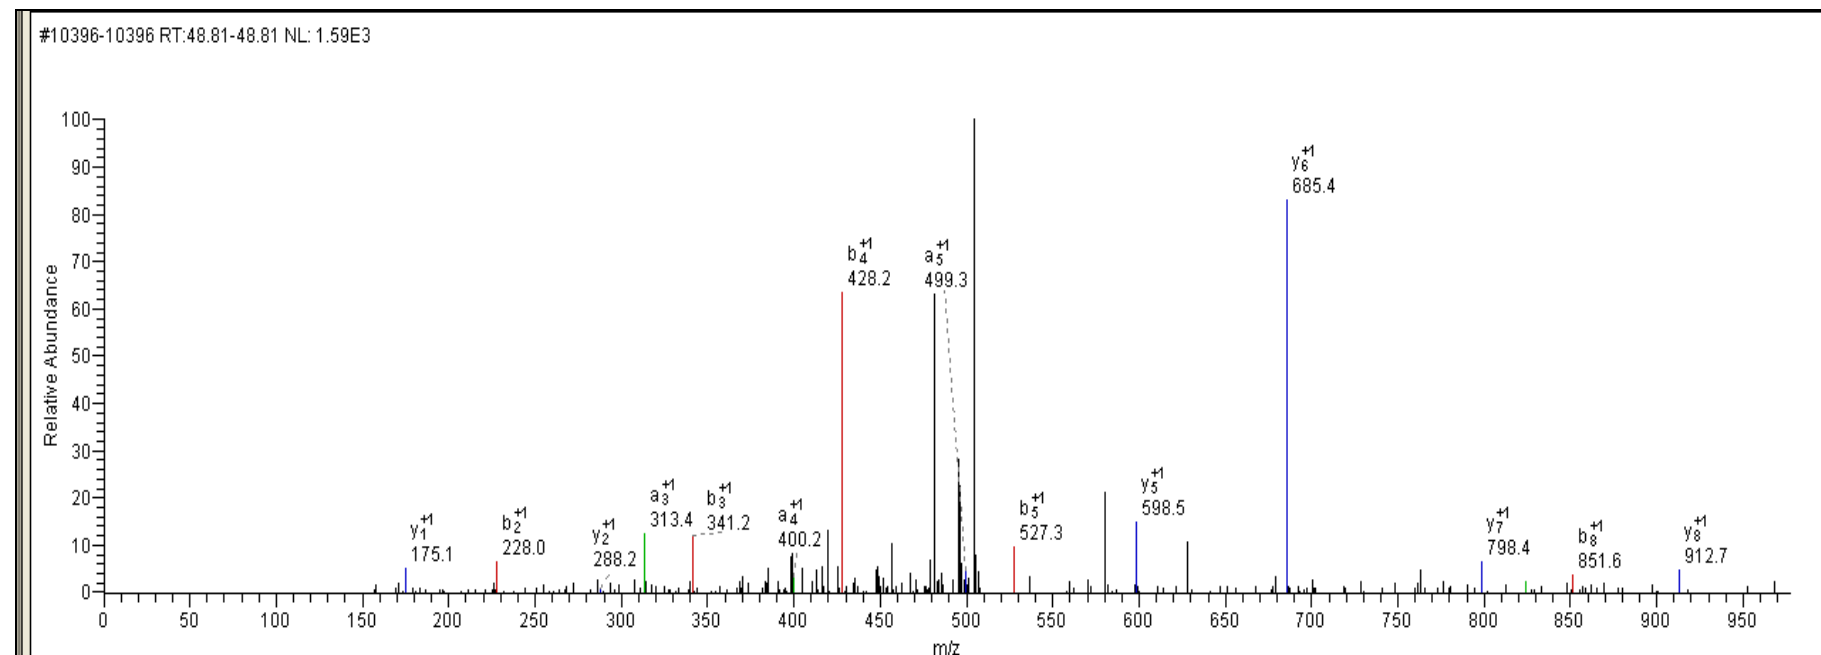

# CG2051 NP\_731006.1 CG2051 CG2051-PB

## K.LGLATQLVESIYR.F

|    | AA | A       | B       | Y       |    |
|----|----|---------|---------|---------|----|
| 1  | L  | 86.10   | 114.09  | -       | 13 |
| 2  | G  | 143.12  | 171.11  | 1349.74 | 12 |
| 3  | L  | 256.20  | 284.20  | 1292.72 | 11 |
| 4  | A  | 327.24  | 355.23  | 1179.64 | 10 |
| 5  | T  | 428.29  | 456.28  | 1108.60 | 9  |
| 6  | Q  | 556.35  | 584.34  | 1007.55 | 8  |
| 7  | L  | 669.43  | 697.42  | 879.49  | 7  |
| 8  | V  | 768.50  | 796.49  | 766.41  | 6  |
| 9  | E  | 897.54  | 925.54  | 667.34  | 5  |
| 10 | S  | 984.57  | 1012.57 | 538.30  | 4  |
| 11 | I  | 1097.66 | 1125.65 | 451.27  | 3  |
| 12 | Y  | 1260.72 | 1288.71 | 338.18  | 2  |
| 13 | R  | -       | -       | 175.12  | 1  |

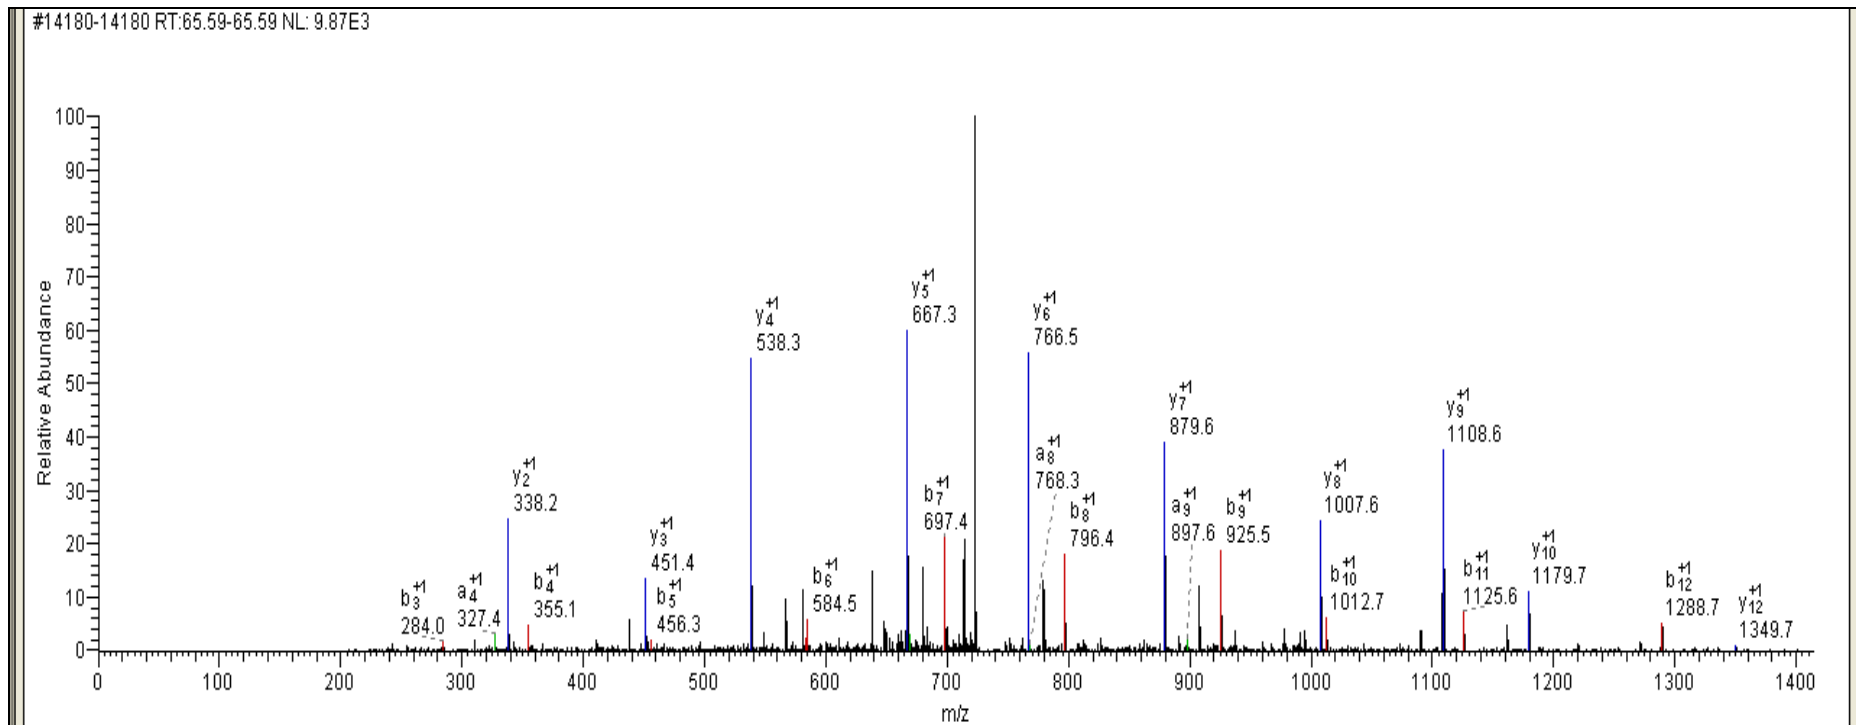

# NP\_572735.1 CG2247 CG2247-PA

## R.LGLVTQLLSATGELYR.G

|    | AA | A       | B       | Y       |    |
|----|----|---------|---------|---------|----|
| 1  | L  | 86.10   | 114.09  | -       | 16 |
| 2  | G  | 143.12  | 171.11  | 1620.90 | 15 |
| 3  | L  | 256.20  | 284.20  | 1563.87 | 14 |
| 4  | V  | 355.27  | 383.27  | 1450.79 | 13 |
| 5  | T  | 456.32  | 484.31  | 1351.72 | 12 |
| 6  | Q  | 584.38  | 612.37  | 1250.67 | 11 |
| 7  | L  | 697.46  | 725.46  | 1122.62 | 10 |
| 8  | L  | 810.54  | 838.54  | 1009.53 | 9  |
| 9  | S  | 897.58  | 925.57  | 896.45  | 8  |
| 10 | A  | 968.61  | 996.61  | 809.42  | 7  |
| 11 | T  | 1069.66 | 1097.66 | 738.38  | 6  |
| 12 | G  | 1126.68 | 1154.68 | 637.33  | 5  |
| 13 | E  | 1255.73 | 1283.72 | 580.31  | 4  |
| 14 | L  | 1368.81 | 1396.80 | 451.27  | 3  |
| 15 | Y  | 1531.87 | 1559.87 | 338.18  | 2  |
| 16 | R  | -       | -       | 175.12  | 1  |

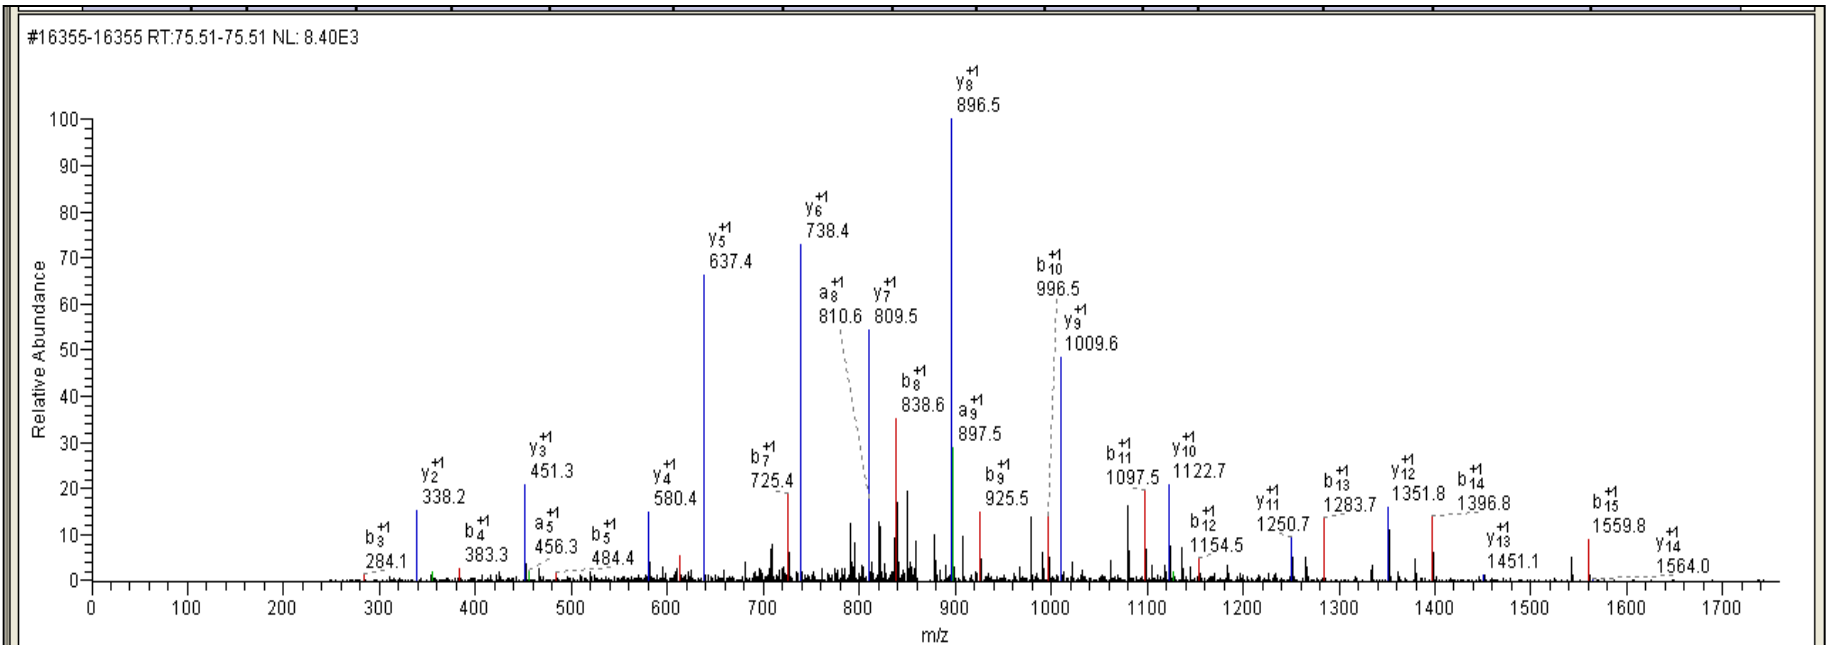

# CG2875 NP\_570069.1 CG2875 CG2875-PA

K.SVLSTADYHVESAK.K

|    | AA | A       | B       | Y       |    |
|----|----|---------|---------|---------|----|
| 1  | S  | 60.04   | 88.04   | -       | 14 |
| 2  | V  | 159.11  | 187.11  | 1419.71 | 13 |
| 3  | L  | 272.20  | 300.19  | 1320.64 | 12 |
| 4  | S  | 359.23  | 387.22  | 1207.56 | 11 |
| 5  | T  | 460.28  | 488.27  | 1120.53 | 10 |
| 6  | A  | 531.31  | 559.31  | 1019.48 | 9  |
| 7  | D  | 646.34  | 674.34  | 948.44  | 8  |
| 8  | Y  | 809.40  | 837.40  | 833.42  | 7  |
| 9  | H  | 946.46  | 974.46  | 670.35  | 6  |
| 10 | V  | 1045.53 | 1073.53 | 533.29  | 5  |
| 11 | E  | 1174.57 | 1202.57 | 434.22  | 4  |
| 12 | S  | 1261.61 | 1289.60 | 305.18  | 3  |
| 13 | A  | 1332.64 | 1360.64 | 218.15  | 2  |
| 14 | K  | -       | -       | 147.11  | 1  |

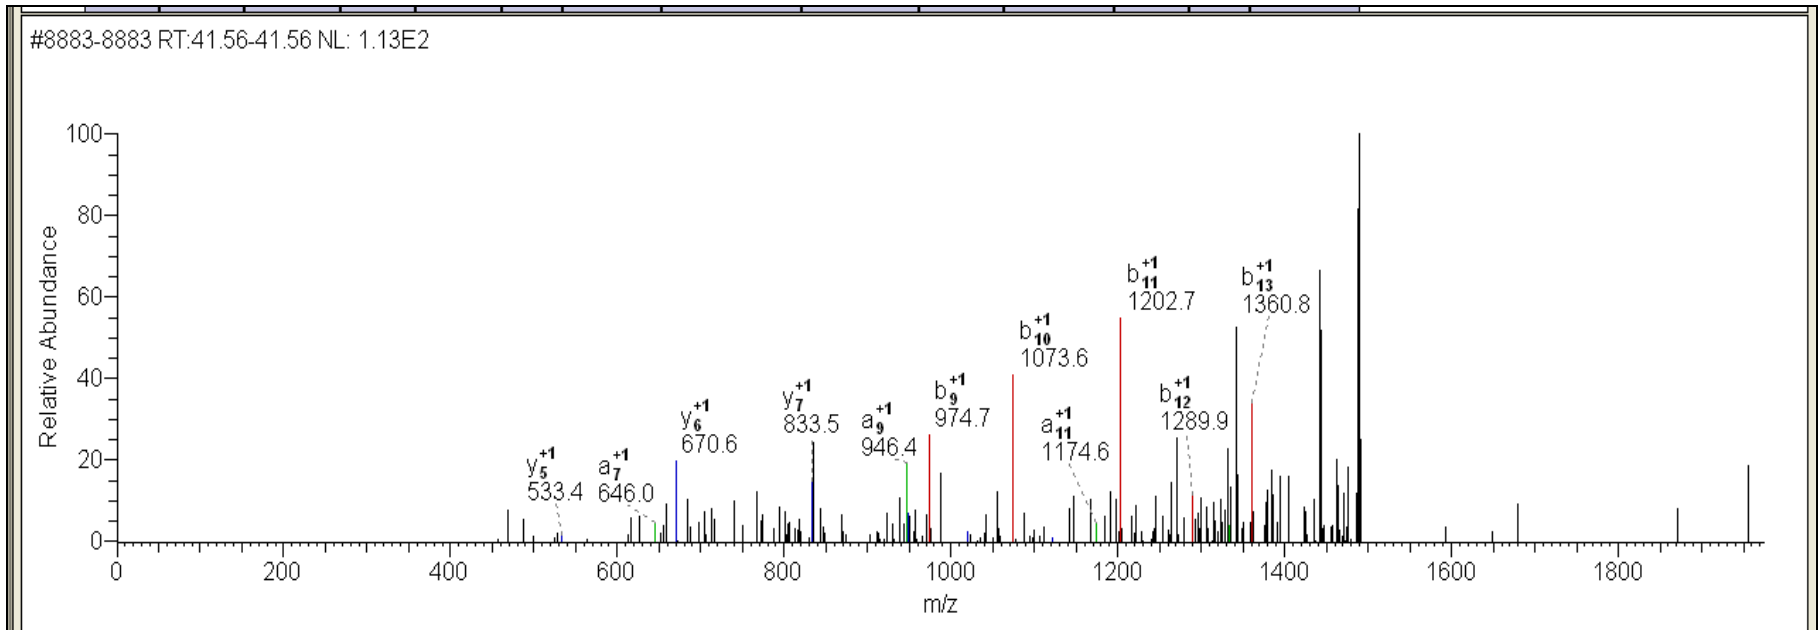

# CG2962 NP\_572612.2 CG2962 CG2962-PA

## K.ILQESAPIVSAPLVESAPQIVK.V

|    | AA | A       | B       | Y       |    |
|----|----|---------|---------|---------|----|
| 1  | I  | 86.10   | 114.09  | -       | 22 |
| 2  | L  | 199.18  | 227.18  | 2176.22 | 21 |
| 3  | Q  | 327.24  | 355.23  | 2063.14 | 20 |
| 4  | E  | 456.28  | 484.28  | 1935.08 | 19 |
| 5  | S  | 543.31  | 571.31  | 1806.04 | 18 |
| 6  | A  | 614.35  | 642.35  | 1719.01 | 17 |
| 7  | P  | 711.40  | 739.40  | 1647.97 | 16 |
| 8  | I  | 824.49  | 852.48  | 1550.92 | 15 |
| 9  | V  | 923.56  | 951.55  | 1437.83 | 14 |
| 10 | S  | 1010.59 | 1038.58 | 1338.76 | 13 |
| 11 | A  | 1081.63 | 1109.62 | 1251.73 | 12 |
| 12 | P  | 1178.68 | 1206.67 | 1180.69 | 11 |
| 13 | L  | 1291.76 | 1319.76 | 1083.64 | 10 |
| 14 | V  | 1390.83 | 1418.83 | 970.56  | 9  |
| 15 | E  | 1519.87 | 1547.87 | 871.49  | 8  |
| 16 | S  | 1606.91 | 1634.90 | 742.45  | 7  |
| 17 | A  | 1677.94 | 1705.94 | 655.41  | 6  |
| 18 | P  | 1774.99 | 1802.99 | 584.38  | 5  |
| 19 | Q  | 1903.05 | 1931.05 | 487.32  | 4  |
| 20 | I  | 2016.14 | 2044.13 | 359.27  | 3  |
| 21 | V  | 2115.21 | 2143.20 | 246.18  | 2  |
| 22 | K  | -       | -       | 147.11  | 1  |

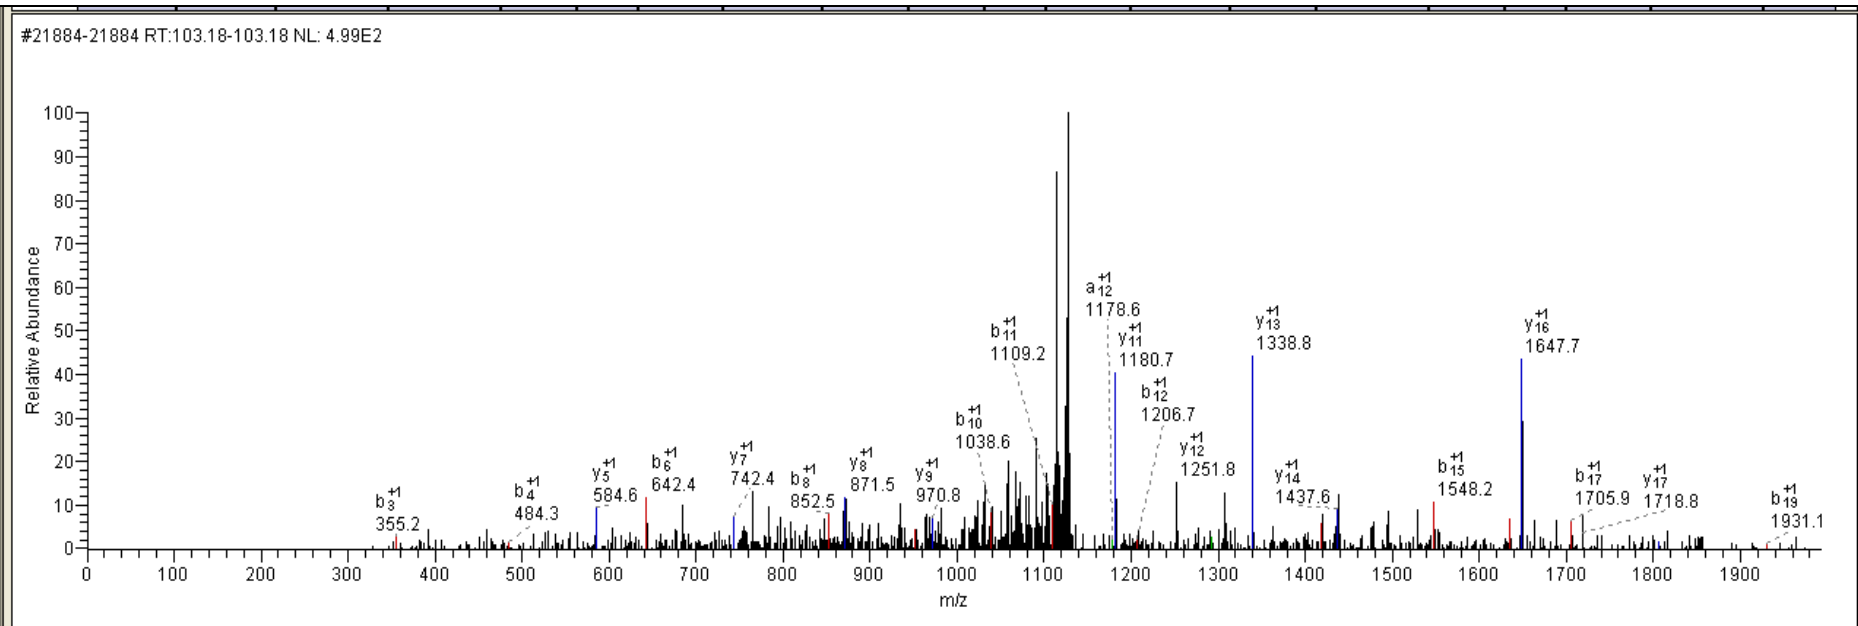

# CG30104 NP\_725681.1 CG30104 CG30104-PB

## K.AVCRAEECNLGNLIADAMVFSR.L

|    | AA | A       | B       | Y       |    |
|----|----|---------|---------|---------|----|
| 1  | A  | 44.05   | 72.04   | -       | 22 |
| 2  | V  | 143.12  | 171.11  | 2327.09 | 21 |
| 3  | C  | 246.13  | 274.12  | 2228.03 | 20 |
| 4  | R  | 402.23  | 430.22  | 2125.02 | 19 |
| 5  | A  | 473.27  | 501.26  | 1968.92 | 18 |
| 6  | E  | 602.31  | 630.30  | 1897.88 | 17 |
| 7  | E  | 731.35  | 759.35  | 1768.84 | 16 |
| 8  | C  | 834.36  | 862.35  | 1639.79 | 15 |
| 9  | N  | 948.40  | 976.40  | 1536.78 | 14 |
| 10 | L  | 1061.49 | 1089.48 | 1422.74 | 13 |
| 11 | G  | 1118.51 | 1146.50 | 1309.66 | 12 |
| 12 | N  | 1232.55 | 1260.55 | 1252.64 | 11 |
| 13 | L  | 1345.64 | 1373.63 | 1138.59 | 10 |
| 14 | I  | 1458.72 | 1486.71 | 1025.51 | 9  |
| 15 | A  | 1529.76 | 1557.75 | 912.42  | 8  |
| 16 | D  | 1644.78 | 1672.78 | 841.39  | 7  |
| 17 | A  | 1715.82 | 1743.82 | 726.36  | 6  |
| 18 | M* | 1862.86 | 1890.85 | 655.32  | 5  |
| 19 | V  | 1961.92 | 1989.92 | 508.29  | 4  |
| 20 | F  | 2108.99 | 2136.99 | 409.22  | 3  |
| 21 | S  | 2196.02 | 2224.02 | 262.15  | 2  |
| 22 | R  | -       | -       | 175.12  | 1  |

#21949-21949 RT:110.89-110.89 NL: 1.11E3

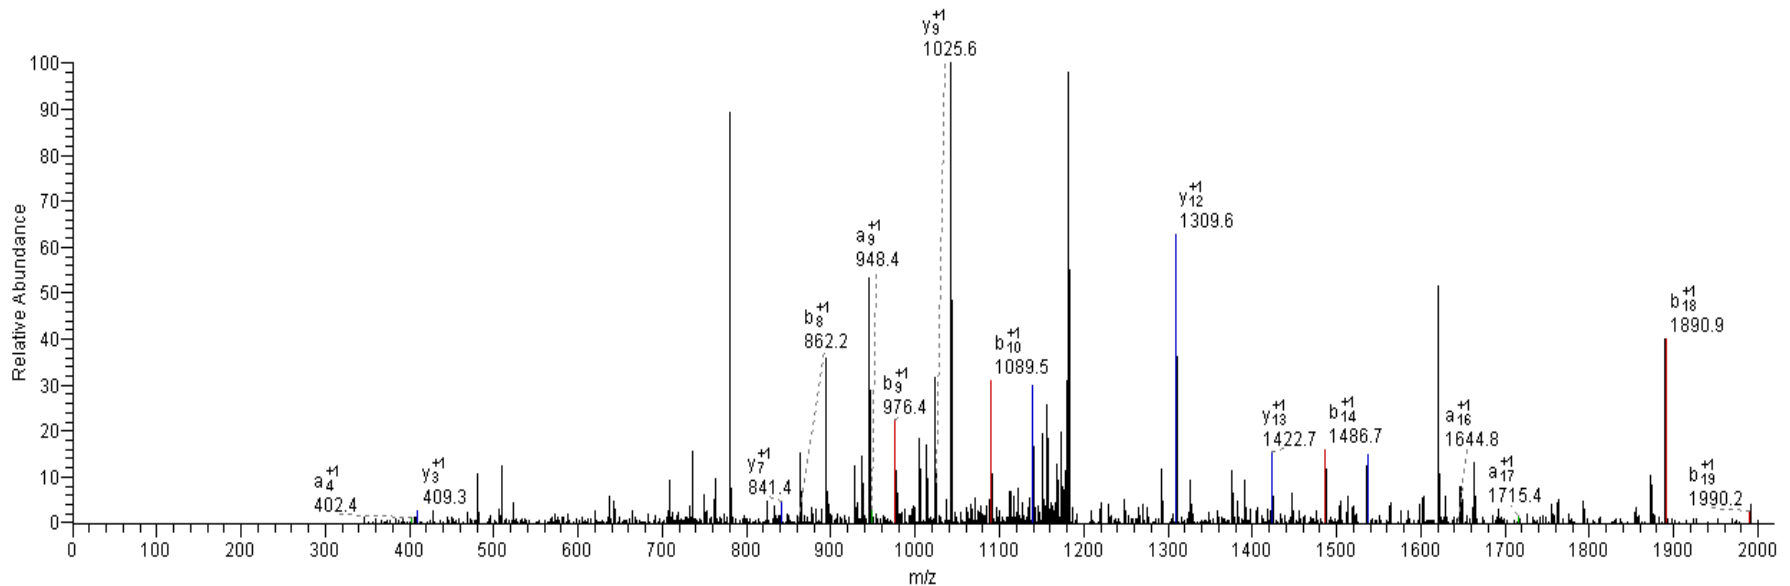

# CG30122 NP\_611354.2 CG30122 CG30122-PB

## R.NFILDQTNVYASAQR.R

|    | AA | A       | B       | Y       |    |
|----|----|---------|---------|---------|----|
| 1  | N  | 87.06   | 115.05  | -       | 15 |
| 2  | F  | 234.12  | 262.12  | 1625.83 | 14 |
| 3  | I  | 347.21  | 375.20  | 1478.76 | 13 |
| 4  | L  | 460.29  | 488.29  | 1365.68 | 12 |
| 5  | D  | 575.32  | 603.31  | 1252.59 | 11 |
| 6  | Q  | 703.38  | 731.37  | 1137.56 | 10 |
| 7  | T  | 804.43  | 832.42  | 1009.51 | 9  |
| 8  | N  | 918.47  | 946.46  | 908.46  | 8  |
| 9  | V  | 1017.54 | 1045.53 | 794.42  | 7  |
| 10 | Y  | 1180.60 | 1208.59 | 695.35  | 6  |
| 11 | A  | 1251.64 | 1279.63 | 532.28  | 5  |
| 12 | S  | 1338.67 | 1366.66 | 461.25  | 4  |
| 13 | A  | 1409.71 | 1437.70 | 374.21  | 3  |
| 14 | Q  | 1537.76 | 1565.76 | 303.18  | 2  |
| 15 | R  | -       | -       | 175.12  | 1  |

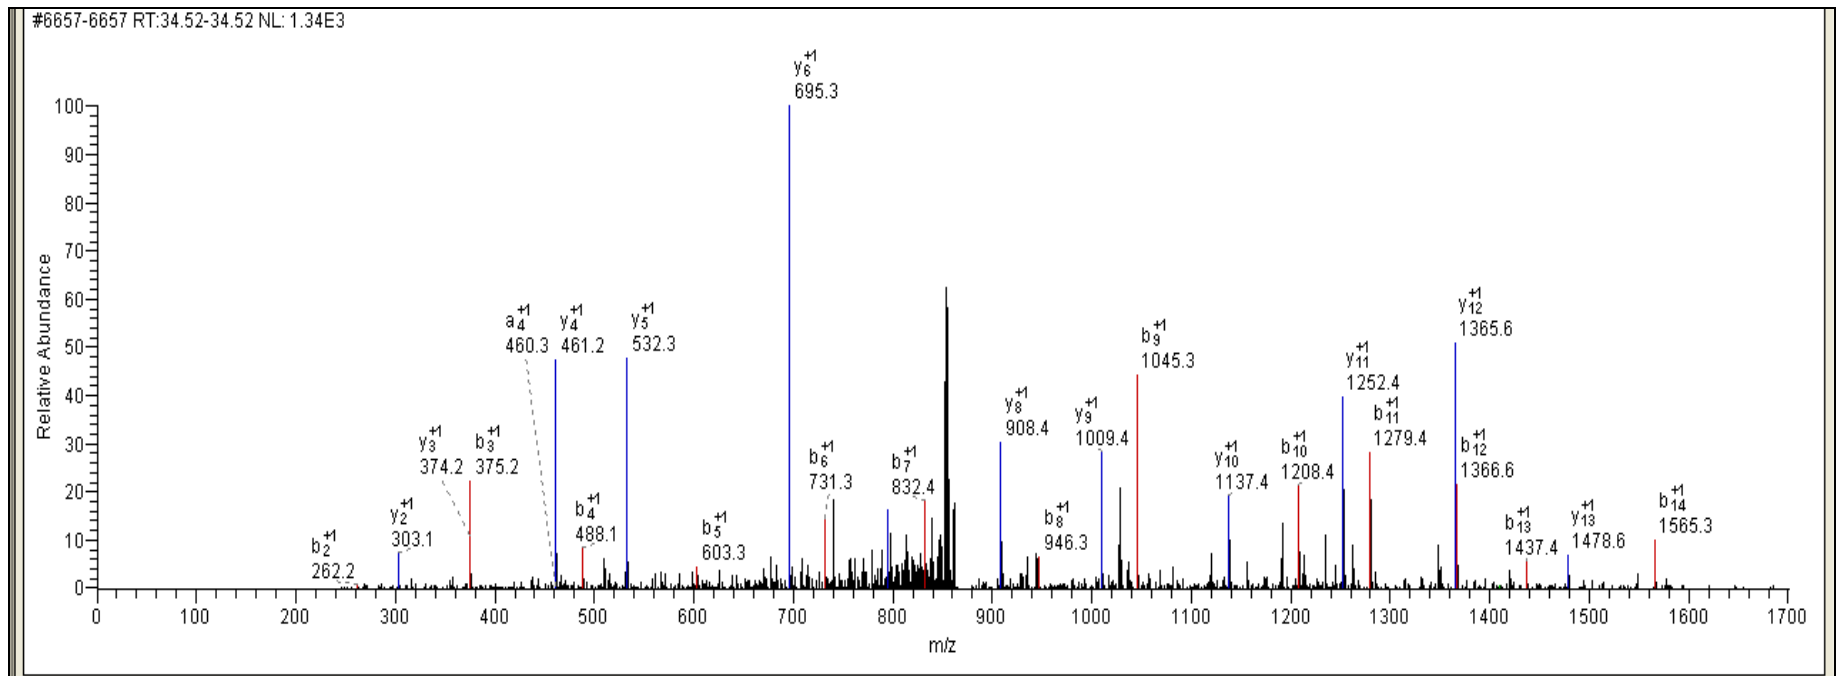

# CG30158 NP\_652315.2 CG30158 CG30158-PA

## R.MNSPALGGAGGSGGDKK.G

|    | AA | A       | B       | Y       |    |
|----|----|---------|---------|---------|----|
| 1  | M* | 120.05  | 148.04  | -       | 17 |
| 2  | N  | 234.09  | 262.09  | 1372.68 | 16 |
| 3  | S  | 321.12  | 349.12  | 1258.64 | 15 |
| 4  | P  | 418.18  | 446.17  | 1171.61 | 14 |
| 5  | A  | 489.21  | 517.21  | 1074.55 | 13 |
| 6  | L  | 602.30  | 630.29  | 1003.52 | 12 |
| 7  | G  | 659.32  | 687.31  | 890.43  | 11 |
| 8  | G  | 716.34  | 744.33  | 833.41  | 10 |
| 9  | A  | 787.38  | 815.37  | 776.39  | 9  |
| 10 | G  | 844.40  | 872.39  | 705.35  | 8  |
| 11 | G  | 901.42  | 929.41  | 648.33  | 7  |
| 12 | S  | 988.45  | 1016.45 | 591.31  | 6  |
| 13 | G  | 1045.47 | 1073.47 | 504.28  | 5  |
| 14 | G  | 1102.49 | 1130.49 | 447.26  | 4  |
| 15 | D  | 1217.52 | 1245.52 | 390.23  | 3  |
| 16 | K  | 1345.62 | 1373.61 | 275.21  | 2  |
| 17 | K  | -       | -       | 147.11  | 1  |

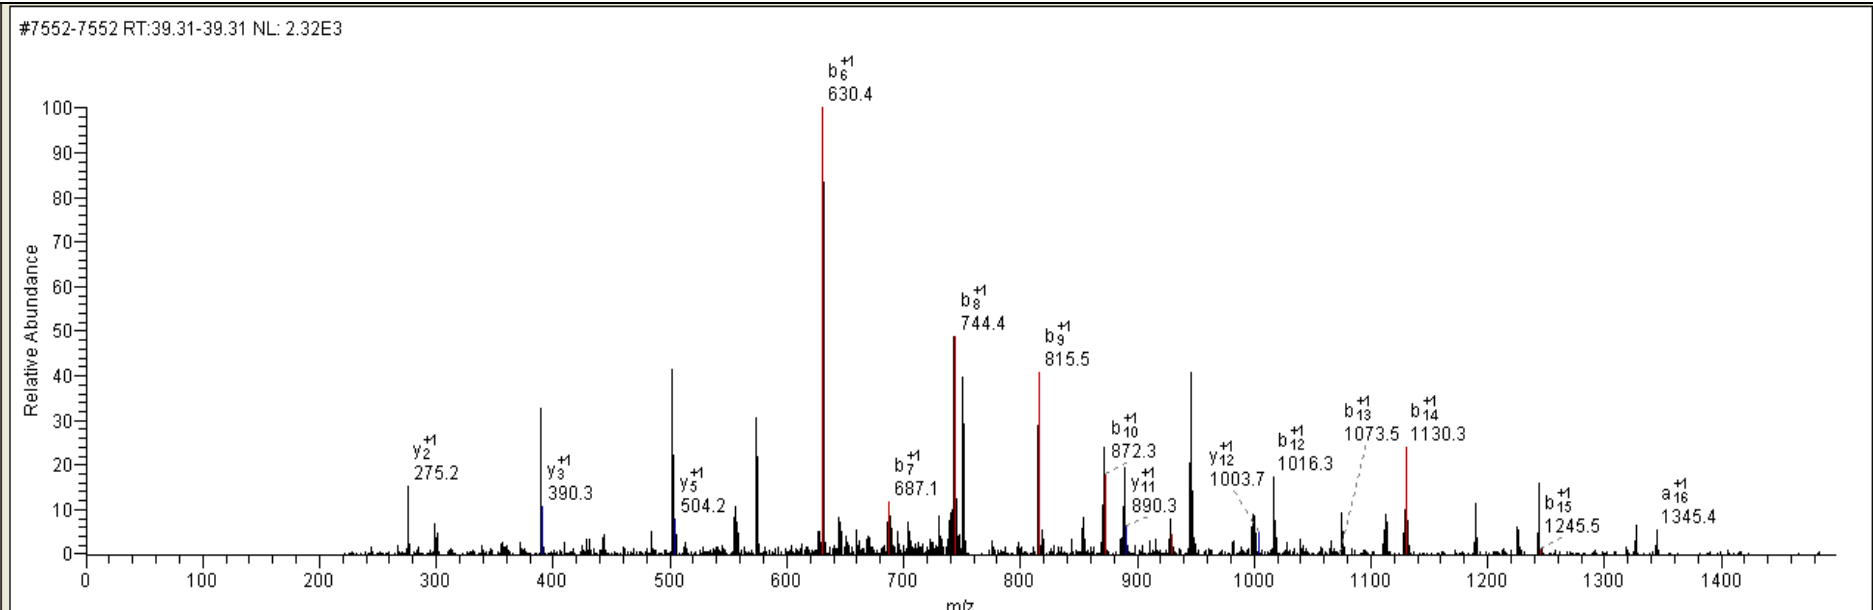



NP\_732682.1 CG31465 CG31465-PA

K.FDATDDRPLESGNCLAR.L

|    | AA | A       | B       | Y       |    |
|----|----|---------|---------|---------|----|
| 1  | F  | 120.08  | 148.08  | -       | 17 |
| 2  | D  | 235.11  | 263.10  | 1732.79 | 16 |
| 3  | A  | 306.14  | 334.14  | 1617.76 | 15 |
| 4  | T  | 407.19  | 435.19  | 1546.73 | 14 |
| 5  | D  | 522.22  | 550.21  | 1445.68 | 13 |
| 6  | D  | 637.25  | 665.24  | 1330.65 | 12 |
| 7  | R  | 793.35  | 821.34  | 1215.63 | 11 |
| 8  | P  | 890.40  | 918.40  | 1059.53 | 10 |
| 9  | L  | 1003.48 | 1031.48 | 962.47  | 9  |
| 10 | E  | 1132.53 | 1160.52 | 849.39  | 8  |
| 11 | S  | 1219.56 | 1247.55 | 720.35  | 7  |
| 12 | G  | 1276.58 | 1304.58 | 633.31  | 6  |
| 13 | N  | 1390.62 | 1418.62 | 576.29  | 5  |
| 14 | C  | 1493.63 | 1521.63 | 462.25  | 4  |
| 15 | L  | 1606.72 | 1634.71 | 359.24  | 3  |
| 16 | A  | 1677.75 | 1705.75 | 246.16  | 2  |
| 17 | R  | -       | -       | 175.12  | 1  |

#6984-6984 RT:32.45-32.45 NL: 3.76E3

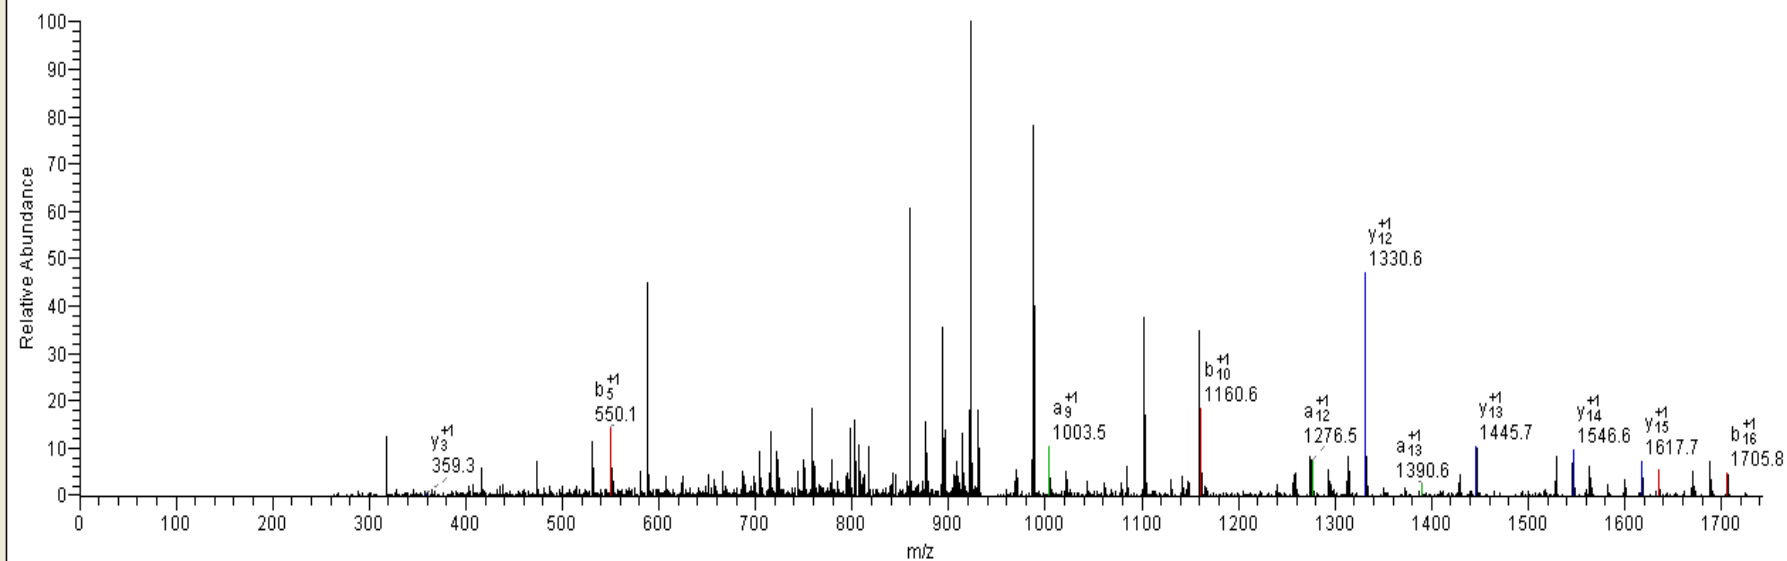

# CG32086 NP\_729720.1 CG32086 CG32086-PA K.TGNLTNVSDVSLDTTYR.L

|    | AA | A       | B       | Y       |    |
|----|----|---------|---------|---------|----|
| 1  | T  | 74.06   | 102.05  | -       | 18 |
| 2  | G  | 131.08  | 159.08  | 1857.86 | 17 |
| 3  | N  | 245.12  | 273.12  | 1800.84 | 16 |
| 4  | L  | 358.21  | 386.20  | 1686.80 | 15 |
| 5  | T  | 459.26  | 487.25  | 1573.72 | 14 |
| 6  | N  | 573.30  | 601.29  | 1472.67 | 13 |
| 7  | V  | 672.37  | 700.36  | 1358.63 | 12 |
| 8  | S  | 759.40  | 787.39  | 1259.56 | 11 |
| 9  | D  | 874.43  | 902.42  | 1172.53 | 10 |
| 10 | V  | 973.49  | 1001.49 | 1057.50 | 9  |
| 11 | S  | 1060.53 | 1088.52 | 958.43  | 8  |
| 12 | C  | 1163.54 | 1191.53 | 871.40  | 7  |
| 13 | L  | 1276.62 | 1304.62 | 768.39  | 6  |
| 14 | D  | 1391.65 | 1419.64 | 655.30  | 5  |
| 15 | T  | 1492.69 | 1520.69 | 540.28  | 4  |
| 16 | T  | 1593.74 | 1621.74 | 439.23  | 3  |
| 17 | Y  | 1756.81 | 1784.80 | 338.18  | 2  |
| 18 | R  | -       | -       | 175.12  | 1  |

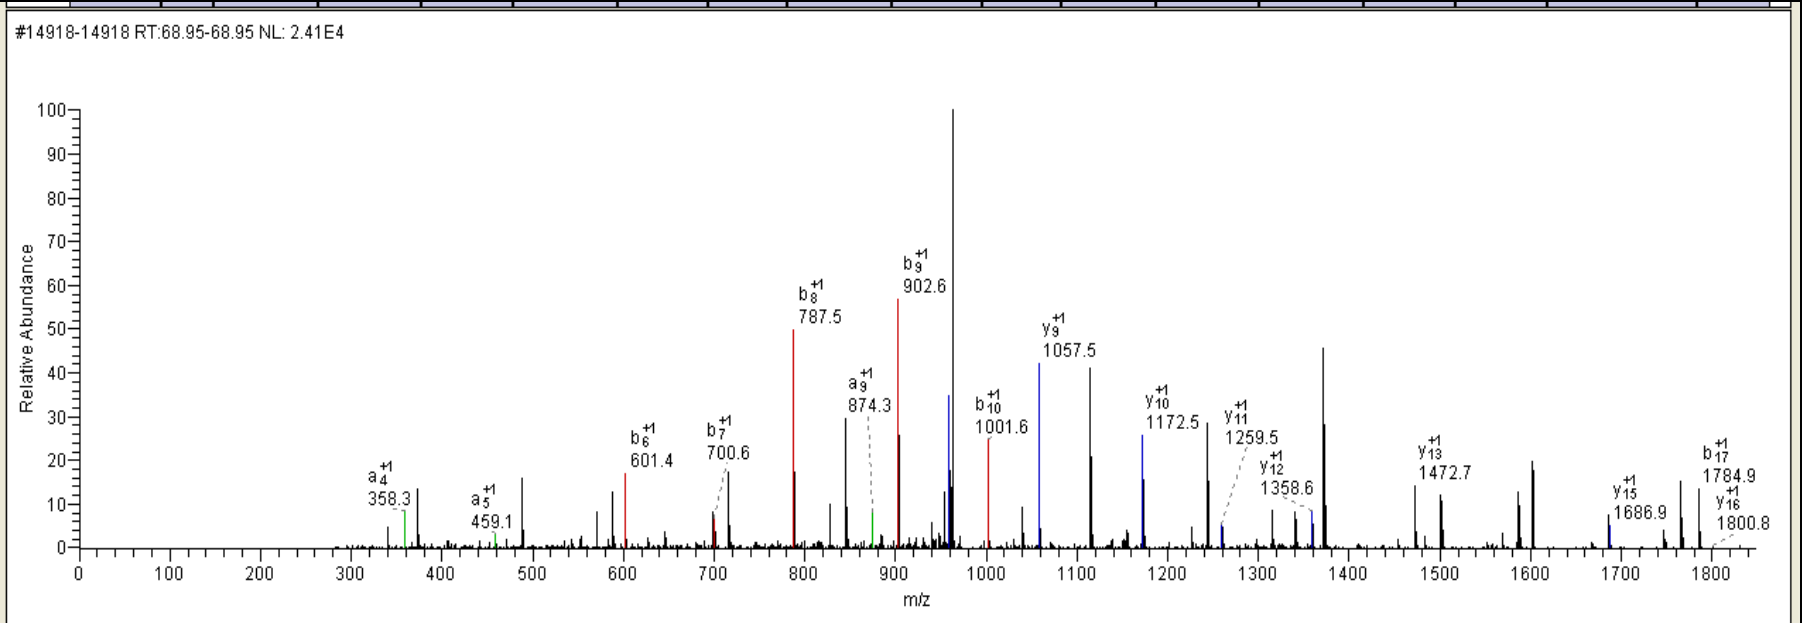

## R.NYNGIAAAPVIAPVAAPLAAPVVAK.Y

| S no | AA | A       | B       | Y       |    |
|------|----|---------|---------|---------|----|
| 1    | N  | 87.06   | 115.05  | -       | 25 |
| 2    | Y  | 250.12  | 278.11  | 2244.31 | 24 |
| 3    | N  | 364.16  | 392.16  | 2081.25 | 23 |
| 4    | G  | 421.18  | 449.18  | 1967.21 | 22 |
| 5    | I  | 534.27  | 562.26  | 1910.18 | 21 |
| 6    | A  | 605.3   | 633.3   | 1797.1  | 20 |
| 7    | A  | 676.34  | 704.34  | 1726.06 | 19 |
| 8    | A  | 747.38  | 775.37  | 1655.03 | 18 |
| 9    | P  | 844.43  | 872.43  | 1583.99 | 17 |
| 10   | V  | 943.5   | 971.49  | 1486.94 | 16 |
| 11   | I  | 1056.58 | 1084.58 | 1387.87 | 15 |
| 12   | A  | 1127.62 | 1155.62 | 1274.78 | 14 |
| 13   | P  | 1224.67 | 1252.67 | 1203.75 | 13 |
| 14   | V  | 1323.74 | 1351.74 | 1106.69 | 12 |
| 15   | A  | 1394.78 | 1422.77 | 1007.62 | 11 |
| 16   | A  | 1465.82 | 1493.81 | 936.59  | 10 |
| 17   | P  | 1562.87 | 1590.86 | 865.55  | 9  |
| 18   | L  | 1675.95 | 1703.95 | 768.5   | 8  |
| 19   | A  | 1746.99 | 1774.99 | 655.41  | 7  |
| 20   | A  | 1818.03 | 1846.02 | 584.38  | 6  |
| 21   | P  | 1915.08 | 1943.07 | 513.34  | 5  |
| 22   | V  | 2014.15 | 2042.14 | 416.29  | 4  |
| 23   | V  | 2113.22 | 2141.21 | 317.22  | 3  |
| 24   | A  | 2184.25 | 2212.25 | 218.15  | 2  |
| 25   | K  | -       | -       | 147.11  | 1  |

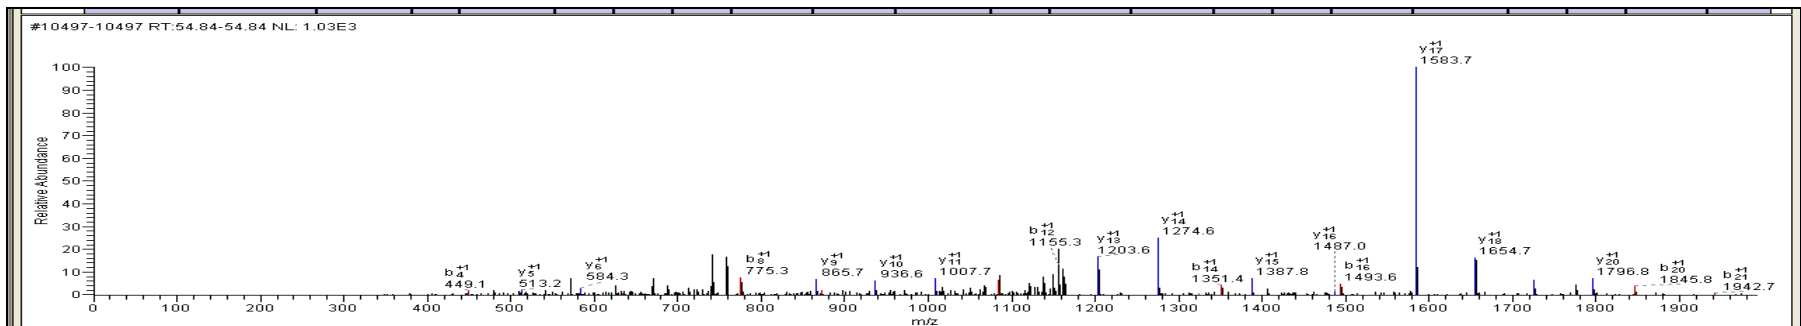

# CG32344 NP\_612028.4 CG32344 CG32344-PA R.SFRPGGTVFELNTTQK.S

|    | AA | A       | B       | Y       |    |
|----|----|---------|---------|---------|----|
| 1  | S  | 60.04   | 88.04   | -       | 16 |
| 2  | F  | 207.11  | 235.11  | 1694.89 | 15 |
| 3  | R  | 363.21  | 391.21  | 1547.82 | 14 |
| 4  | P  | 460.27  | 488.26  | 1391.72 | 13 |
| 5  | G  | 517.29  | 545.28  | 1294.66 | 12 |
| 6  | G  | 574.31  | 602.30  | 1237.64 | 11 |
| 7  | T  | 675.36  | 703.35  | 1180.62 | 10 |
| 8  | V  | 774.43  | 802.42  | 1079.57 | 9  |
| 9  | F  | 921.49  | 949.49  | 980.50  | 8  |
| 10 | E  | 1050.54 | 1078.53 | 833.44  | 7  |
| 11 | L  | 1163.62 | 1191.62 | 704.39  | 6  |
| 12 | N  | 1277.66 | 1305.66 | 591.31  | 5  |
| 13 | T  | 1378.71 | 1406.71 | 477.27  | 4  |
| 14 | T  | 1479.76 | 1507.75 | 376.22  | 3  |
| 15 | Q  | 1607.82 | 1635.81 | 275.17  | 2  |
| 16 | K  | -       | -       | 147.11  | 1  |

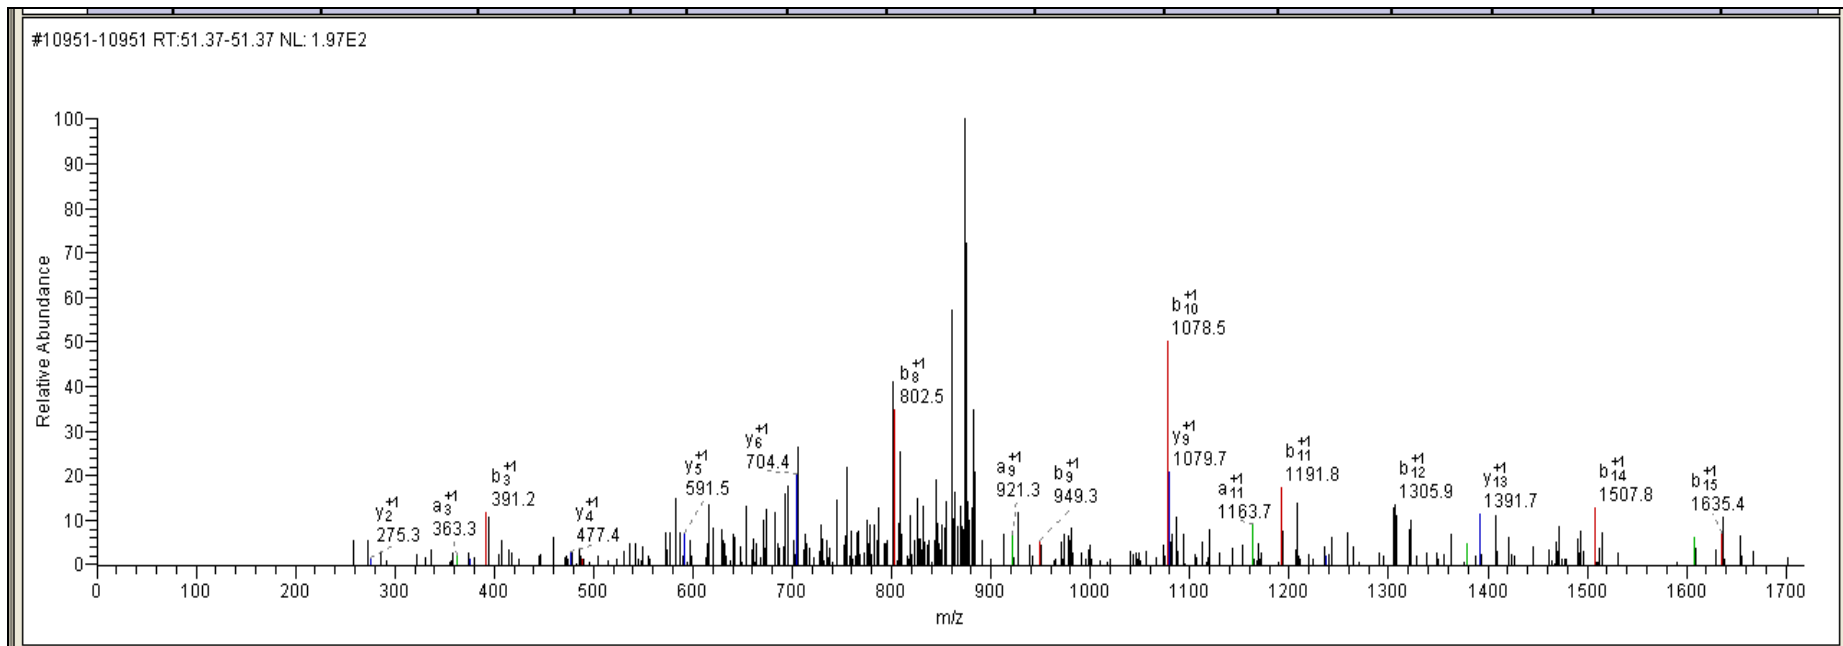

# TwdIY NP\_728017.1 CG32570 CG32570-PA K.FYLV SAPEDHSNDGKVK.H

|    | AA | A       | B       | Y       |    |
|----|----|---------|---------|---------|----|
| 1  | F  | 120.08  | 148.08  | -       | 17 |
| 2  | Y  | 283.14  | 311.14  | 1758.87 | 16 |
| 3  | L  | 396.23  | 424.22  | 1595.80 | 15 |
| 4  | V  | 495.30  | 523.29  | 1482.72 | 14 |
| 5  | S  | 582.33  | 610.32  | 1383.65 | 13 |
| 6  | A  | 653.37  | 681.36  | 1296.62 | 12 |
| 7  | P  | 750.42  | 778.41  | 1225.58 | 11 |
| 8  | E  | 879.46  | 907.46  | 1128.53 | 10 |
| 9  | D  | 994.49  | 1022.48 | 999.49  | 9  |
| 10 | H  | 1131.55 | 1159.54 | 884.46  | 8  |
| 11 | S  | 1218.58 | 1246.57 | 747.40  | 7  |
| 12 | N  | 1332.62 | 1360.62 | 660.37  | 6  |
| 13 | D  | 1447.65 | 1475.64 | 546.32  | 5  |
| 14 | G  | 1504.67 | 1532.67 | 431.30  | 4  |
| 15 | K  | 1632.77 | 1660.76 | 374.28  | 3  |
| 16 | V  | 1731.83 | 1759.83 | 246.18  | 2  |
| 17 | K  | -       | -       | 147.11  | 1  |

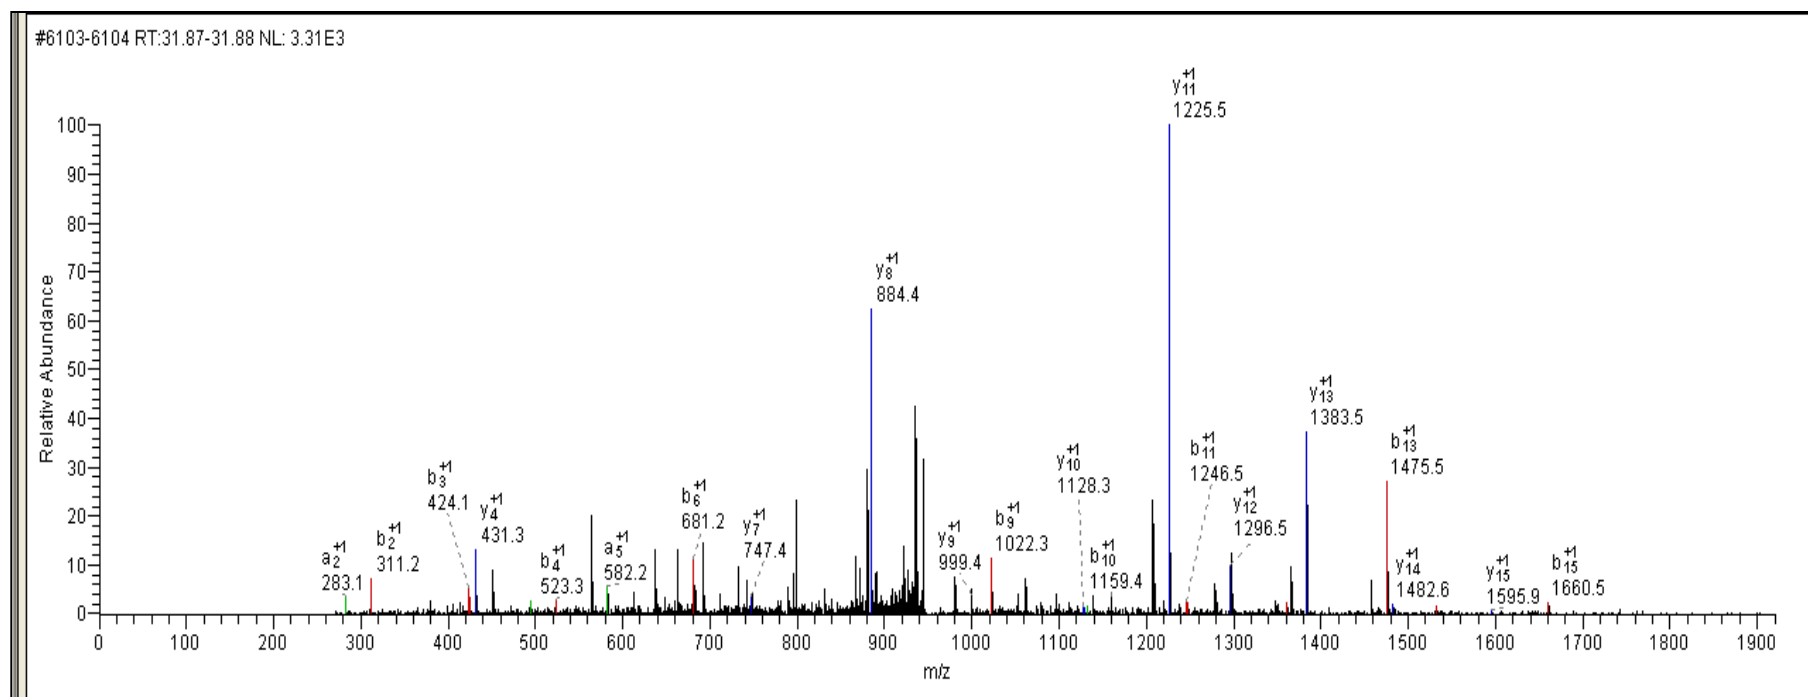

# NP\_001036688.1 CG34135 CG34135-PA

## R.PMLDSDYDGTVDGIVAR.P

|    | AA | A       | B       | Y       |    |
|----|----|---------|---------|---------|----|
| 1  | P  | 70.07   | 98.06   | -       | 17 |
| 2  | M* | 217.10  | 245.10  | 1742.79 | 16 |
| 3  | L  | 330.18  | 358.18  | 1595.75 | 15 |
| 4  | D  | 445.21  | 473.21  | 1482.67 | 14 |
| 5  | S  | 532.24  | 560.24  | 1367.64 | 13 |
| 6  | D  | 647.27  | 675.27  | 1280.61 | 12 |
| 7  | Y  | 810.33  | 838.33  | 1165.58 | 11 |
| 8  | D  | 925.36  | 953.36  | 1002.52 | 10 |
| 9  | G  | 982.38  | 1010.38 | 887.49  | 9  |
| 10 | T  | 1083.43 | 1111.42 | 830.47  | 8  |
| 11 | V  | 1182.50 | 1210.49 | 729.43  | 7  |
| 12 | D  | 1297.53 | 1325.52 | 630.36  | 6  |
| 13 | G  | 1354.55 | 1382.54 | 515.33  | 5  |
| 14 | I  | 1467.63 | 1495.63 | 458.31  | 4  |
| 15 | V  | 1566.70 | 1594.69 | 345.22  | 3  |
| 16 | A  | 1637.74 | 1665.73 | 246.16  | 2  |
| 17 | R  | -       | -       | 175.12  | 1  |

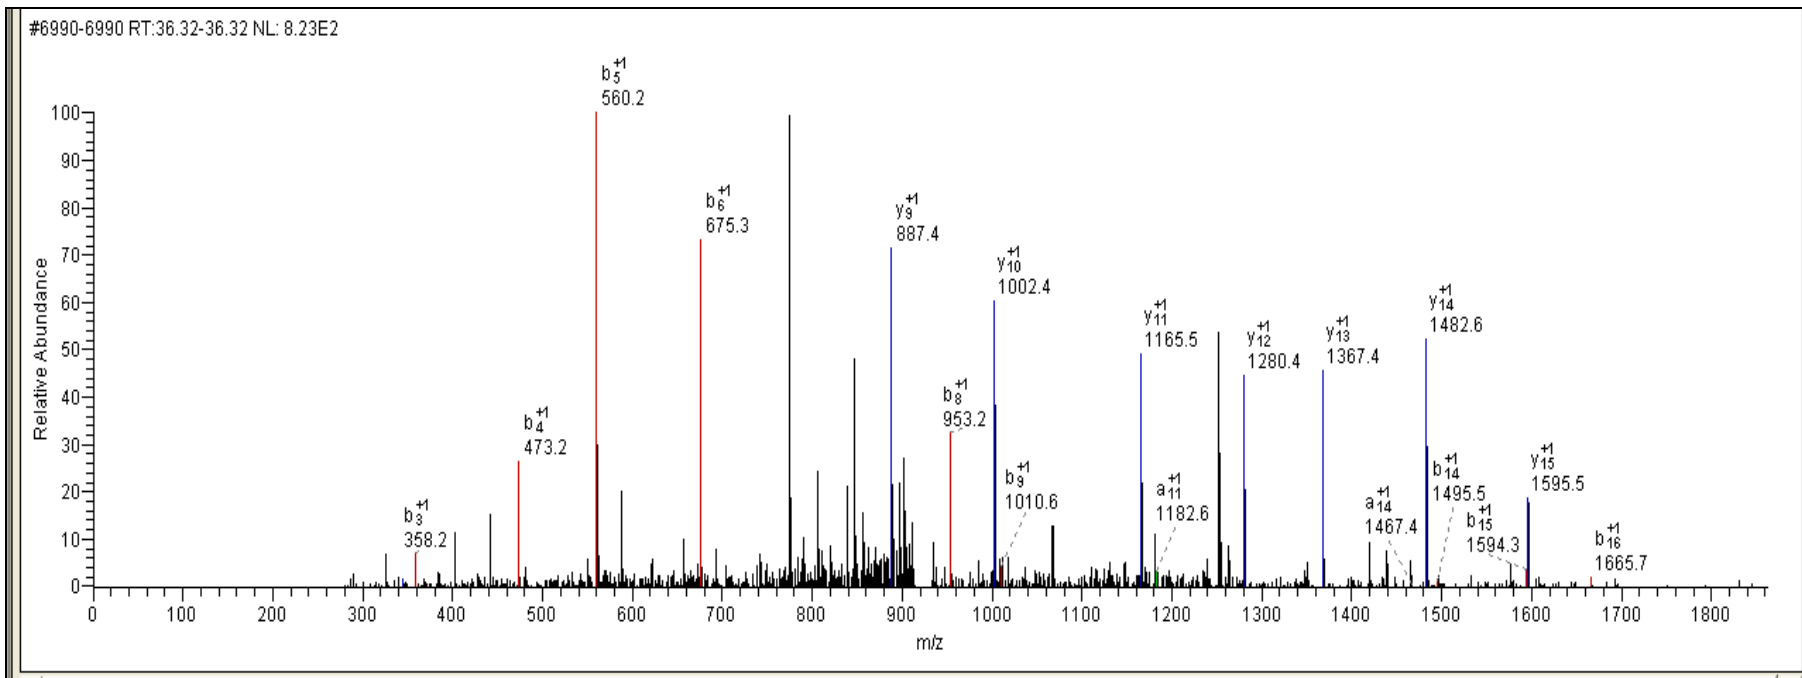

# CG3909 NP\_649969.1 CG3909 CG3909-PA

## K.YIASGAIDGIITIFDVAAGK.V

|    | AA | A       | B       | Y       |    |
|----|----|---------|---------|---------|----|
| 1  | Y  | 136.08  | 164.07  | -       | 20 |
| 2  | I  | 249.16  | 277.15  | 1832.02 | 19 |
| 3  | A  | 320.20  | 348.19  | 1718.93 | 18 |
| 4  | S  | 407.23  | 435.22  | 1647.90 | 17 |
| 5  | G  | 464.25  | 492.25  | 1560.86 | 16 |
| 6  | A  | 535.29  | 563.28  | 1503.84 | 15 |
| 7  | I  | 648.37  | 676.37  | 1432.80 | 14 |
| 8  | D  | 763.40  | 791.39  | 1319.72 | 13 |
| 9  | G  | 820.42  | 848.41  | 1204.69 | 12 |
| 10 | I  | 933.50  | 961.50  | 1147.67 | 11 |
| 11 | I  | 1046.59 | 1074.58 | 1034.59 | 10 |
| 12 | T  | 1147.64 | 1175.63 | 921.50  | 9  |
| 13 | I  | 1260.72 | 1288.71 | 820.46  | 8  |
| 14 | F  | 1407.79 | 1435.78 | 707.37  | 7  |
| 15 | D  | 1522.82 | 1550.81 | 560.30  | 6  |
| 16 | V  | 1621.88 | 1649.88 | 445.28  | 5  |
| 17 | A  | 1692.92 | 1720.92 | 346.21  | 4  |
| 18 | A  | 1763.96 | 1791.95 | 275.17  | 3  |
| 19 | G  | 1820.98 | 1848.97 | 204.13  | 2  |
| 20 | K  | -       | -       | 147.11  | 1  |

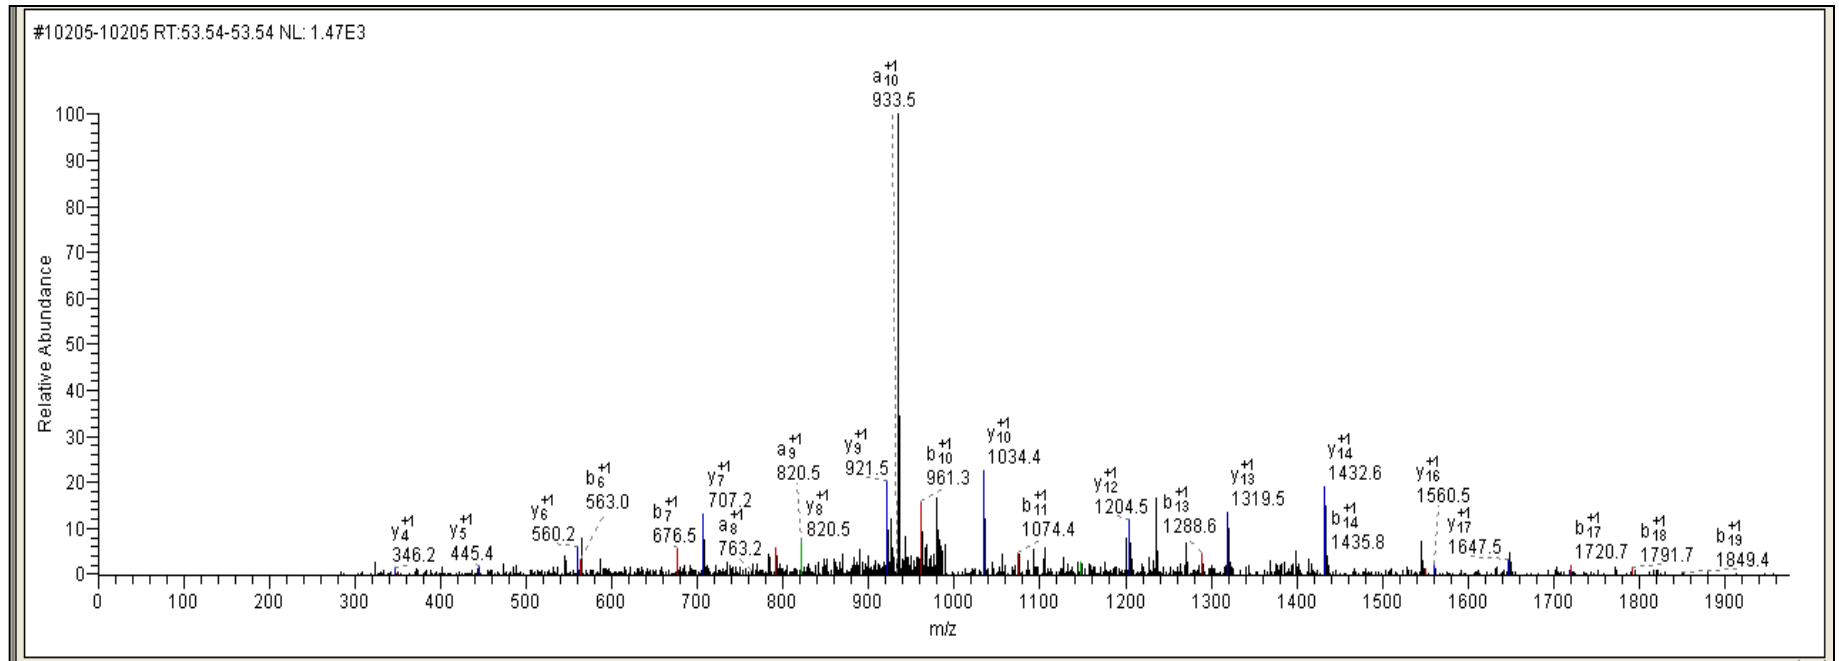

# TwdIW NP\_650606.2 CG4060 CG4060-PA

## K.YRTPEEALNAQR.Q

|    | AA | A       | B       | Y       |    |
|----|----|---------|---------|---------|----|
| 1  | Y  | 136.08  | 164.07  | -       | 12 |
| 2  | R  | 292.18  | 320.17  | 1284.67 | 11 |
| 3  | T  | 393.22  | 421.22  | 1128.56 | 10 |
| 4  | P  | 490.28  | 518.27  | 1027.52 | 9  |
| 5  | E  | 619.32  | 647.31  | 930.46  | 8  |
| 6  | E  | 748.36  | 776.36  | 801.42  | 7  |
| 7  | A  | 819.40  | 847.39  | 672.38  | 6  |
| 8  | L  | 932.48  | 960.48  | 601.34  | 5  |
| 9  | N  | 1046.53 | 1074.52 | 488.26  | 4  |
| 10 | A  | 1117.56 | 1145.56 | 374.21  | 3  |
| 11 | Q  | 1245.62 | 1273.62 | 303.18  | 2  |
| 12 | R  | -       | -       | 175.12  | 1  |

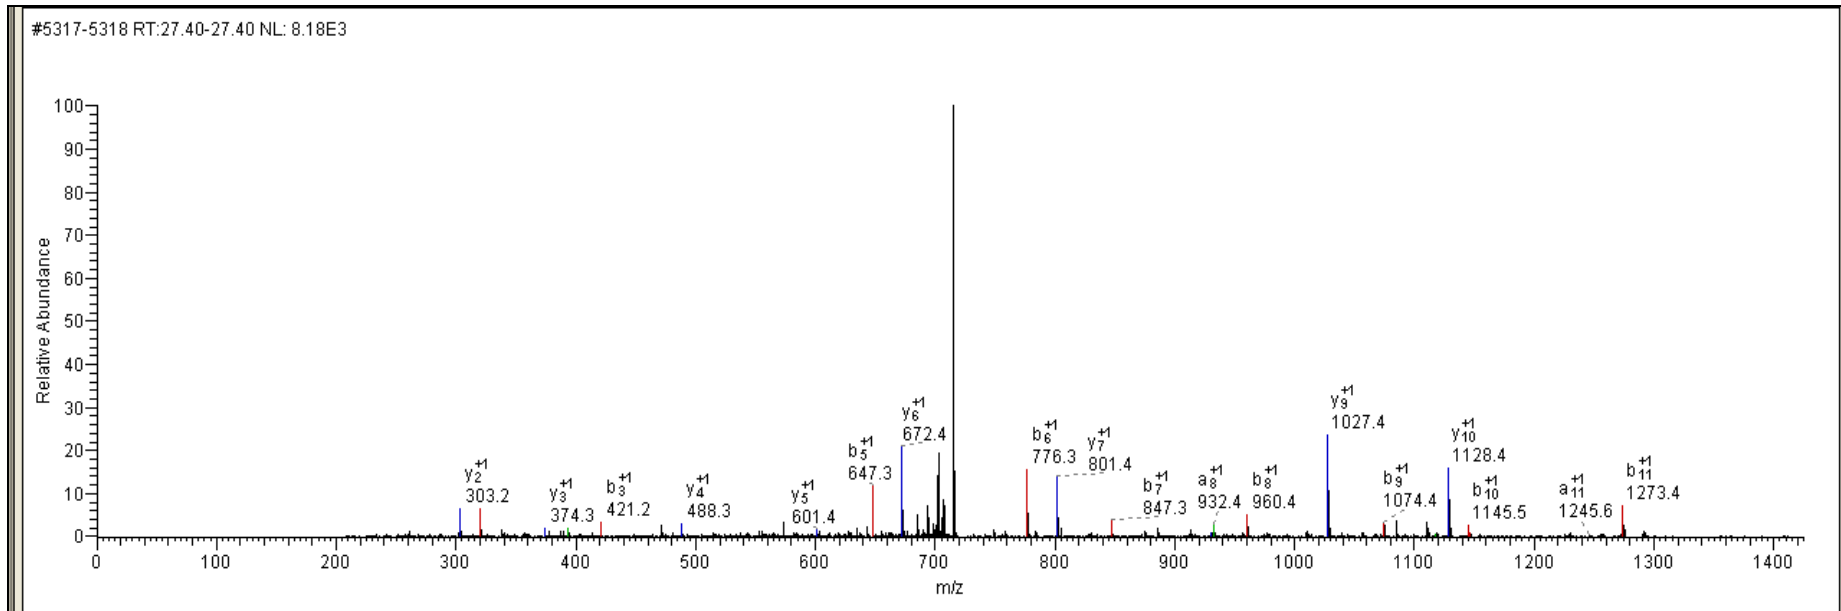



# CG4169 NP\_648905.1 CG4169 CG4169-PA

## K.LAVGAIGHLANVPYASDLA

|    | AA | A       | B       | Y       |    |
|----|----|---------|---------|---------|----|
| 1  | L  | 86.10   | 114.09  | -       | 19 |
| 2  | A  | 157.13  | 185.13  | 1738.91 | 18 |
| 3  | V  | 256.20  | 284.20  | 1667.88 | 17 |
| 4  | G  | 313.22  | 341.22  | 1568.81 | 16 |
| 5  | A  | 384.26  | 412.26  | 1511.79 | 15 |
| 6  | I  | 497.34  | 525.34  | 1440.75 | 14 |
| 7  | G  | 554.37  | 582.36  | 1327.66 | 13 |
| 8  | H  | 691.42  | 719.42  | 1270.64 | 12 |
| 9  | L  | 804.51  | 832.50  | 1133.58 | 11 |
| 10 | A  | 875.55  | 903.54  | 1020.50 | 10 |
| 11 | N  | 989.59  | 1017.58 | 949.46  | 9  |
| 12 | V  | 1088.66 | 1116.65 | 835.42  | 8  |
| 13 | P  | 1185.71 | 1213.71 | 736.35  | 7  |
| 14 | Y  | 1348.77 | 1376.77 | 639.30  | 6  |
| 15 | A  | 1419.81 | 1447.81 | 476.24  | 5  |
| 16 | S  | 1506.84 | 1534.84 | 405.20  | 4  |
| 17 | D  | 1621.87 | 1649.86 | 318.17  | 3  |
| 18 | L  | 1734.95 | 1762.95 | 203.14  | 2  |
| 19 | A  | -       | -       | 90.05   | 1  |

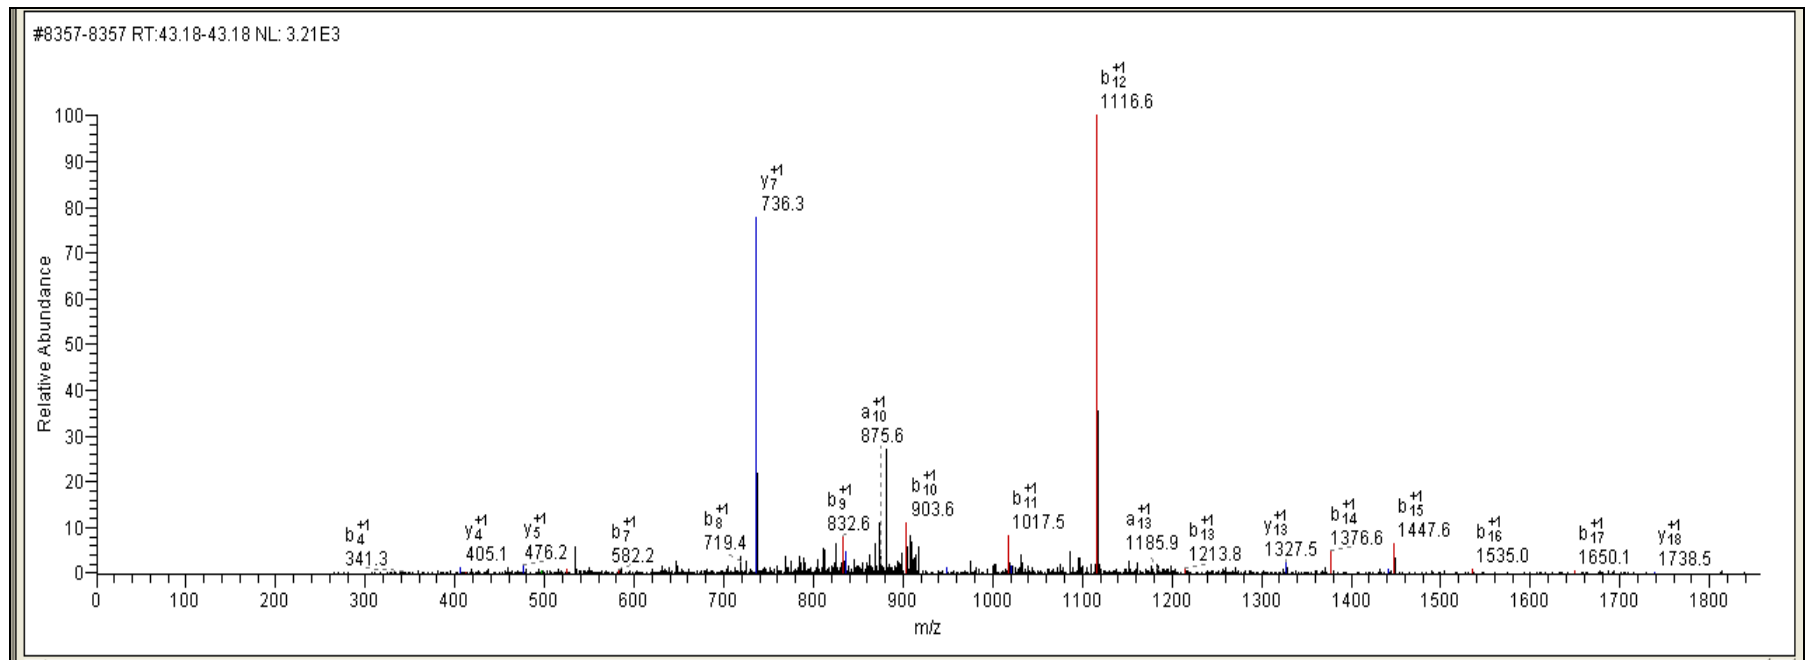

# CG4266 NP\_611557.2 CG4266 CG4266-PA

R.HQYGMDKDLFAPR.F

|    | AA | A       | B       | Y       |    |
|----|----|---------|---------|---------|----|
| 1  | H  | 110.07  | 138.07  | -       | 13 |
| 2  | Q  | 238.13  | 266.12  | 1456.69 | 12 |
| 3  | Y  | 401.19  | 429.19  | 1328.63 | 11 |
| 4  | G  | 458.21  | 486.21  | 1165.57 | 10 |
| 5  | M* | 605.25  | 633.24  | 1108.55 | 9  |
| 6  | D  | 720.28  | 748.27  | 961.51  | 8  |
| 7  | K  | 848.37  | 876.37  | 846.48  | 7  |
| 8  | D  | 963.40  | 991.39  | 718.39  | 6  |
| 9  | L  | 1076.48 | 1104.48 | 603.36  | 5  |
| 10 | F  | 1223.55 | 1251.55 | 490.28  | 4  |
| 11 | A  | 1294.59 | 1322.58 | 343.21  | 3  |
| 12 | P  | 1391.64 | 1419.64 | 272.17  | 2  |
| 13 | R  | -       | -       | 175.12  | 1  |

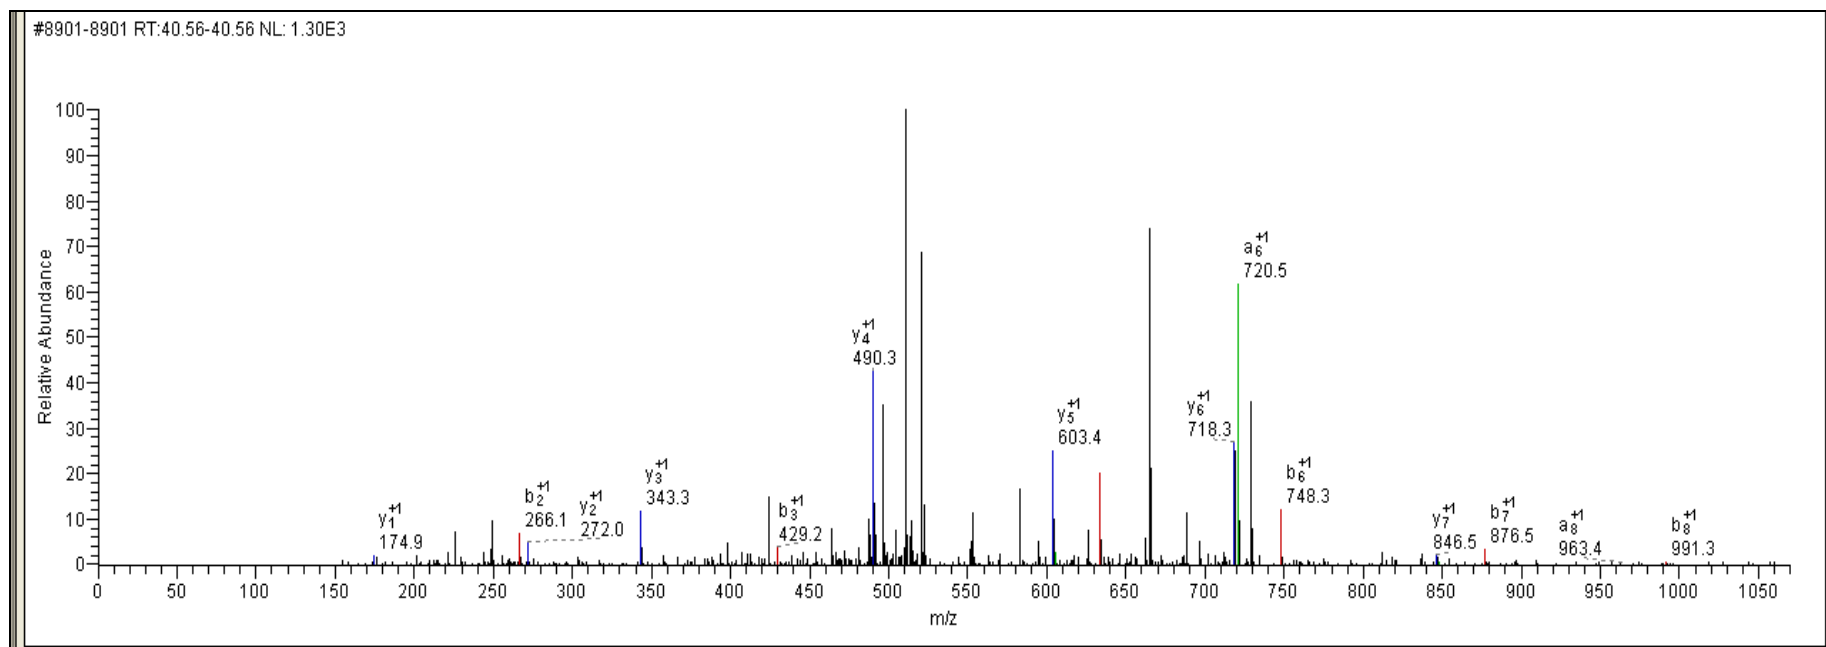

Supplement: supp_M110.001362_mcp.M110.001362-3.pdf [file supp_M110.001362_mcp.M110.001362-3.pdf]
