# Supplementary material
Source: PubMed Central journal article supplement (PMC2938118)

# CG4554 NP\_611676.1 CG4554 CG4554-PA

K.DSLSSNHAR.T

|   | AA | A      | B      | Y      |   |
|---|----|--------|--------|--------|---|
| 1 | D  | 88.04  | 116.03 | -      | 9 |
| 2 | S  | 175.07 | 203.07 | 871.44 | 8 |
| 3 | L  | 288.16 | 316.15 | 784.41 | 7 |
| 4 | S  | 375.19 | 403.18 | 671.32 | 6 |
| 5 | S  | 462.22 | 490.21 | 584.29 | 5 |
| 6 | N  | 576.26 | 604.26 | 497.26 | 4 |
| 7 | H  | 713.32 | 741.32 | 383.21 | 3 |
| 8 | A  | 784.36 | 812.35 | 246.16 | 2 |
| 9 | R  | -      | -      | 175.12 | 1 |

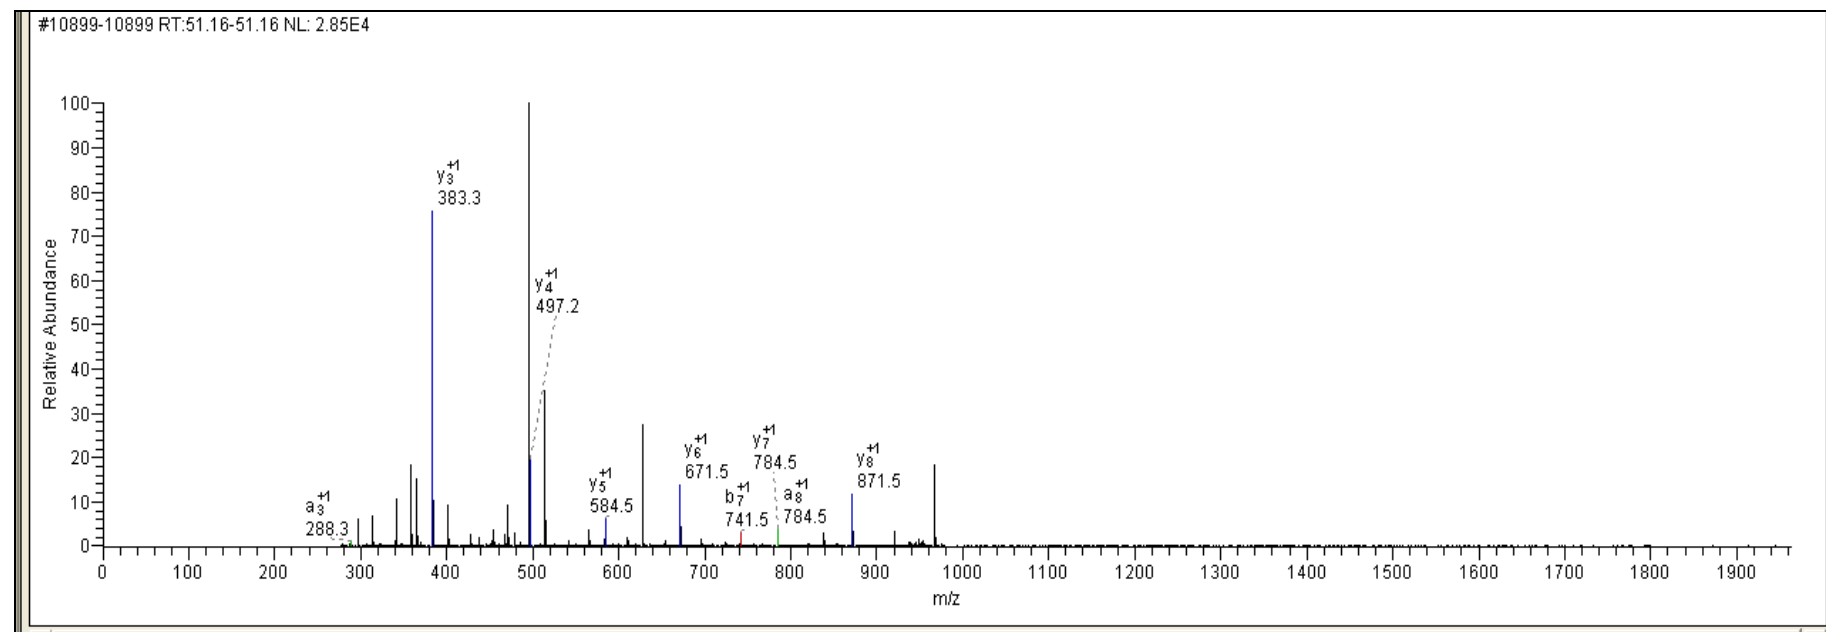

# CG4747 NP\_609336.3 CG4747 CG4747-PA

## R.RVETDALLASIAAK.R

|    | AA | A       | B       | Y       |    |
|----|----|---------|---------|---------|----|
| 1  | R  | 129.11  | 157.11  | -       | 14 |
| 2  | V  | 228.18  | 256.18  | 1301.73 | 13 |
| 3  | E  | 357.22  | 385.22  | 1202.66 | 12 |
| 4  | T  | 458.27  | 486.27  | 1073.62 | 11 |
| 5  | D  | 573.30  | 601.29  | 972.57  | 10 |
| 6  | A  | 644.34  | 672.33  | 857.55  | 9  |
| 7  | L  | 757.42  | 785.42  | 786.51  | 8  |
| 8  | L  | 870.50  | 898.50  | 673.42  | 7  |
| 9  | A  | 941.54  | 969.54  | 560.34  | 6  |
| 10 | S  | 1028.57 | 1056.57 | 489.30  | 5  |
| 11 | I  | 1141.66 | 1169.65 | 402.27  | 4  |
| 12 | A  | 1212.69 | 1240.69 | 289.19  | 3  |
| 13 | A  | 1283.73 | 1311.73 | 218.15  | 2  |
| 14 | K  | -       | -       | 147.11  | 1  |

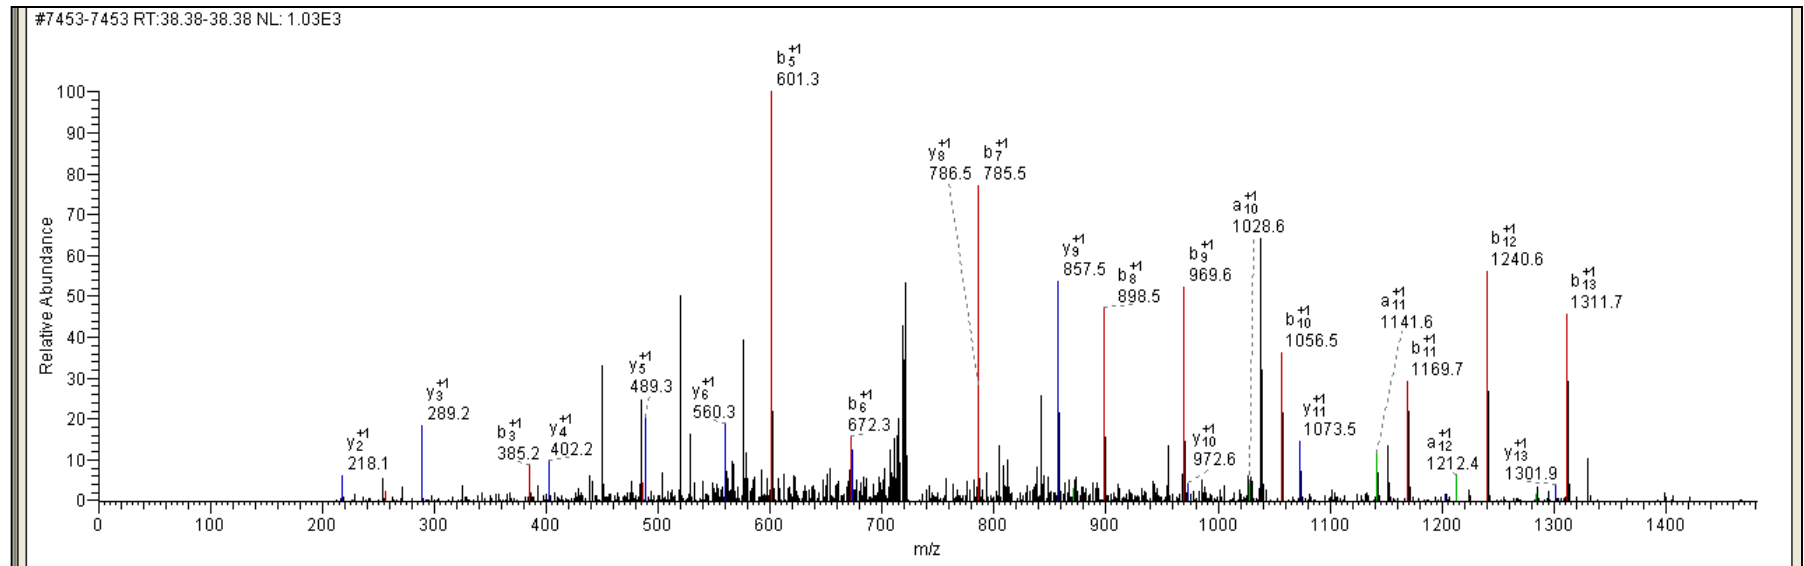

# NP\_609499.1 CG4788 CG4788-PA

## R.IKPGTHAHVINYVIIDEGSDSLEK.A

| S no | AA | A       | B       | Y       |    |
|------|----|---------|---------|---------|----|
| 1    | I  | 86.1    | 114.09  | -       | 24 |
| 2    | K  | 214.19  | 242.19  | 2522.29 | 23 |
| 3    | P  | 311.24  | 339.24  | 2394.19 | 22 |
| 4    | G  | 368.27  | 396.26  | 2297.14 | 21 |
| 5    | T  | 469.31  | 497.31  | 2240.12 | 20 |
| 6    | H  | 606.37  | 634.37  | 2139.07 | 19 |
| 7    | A  | 677.41  | 705.4   | 2002.01 | 18 |
| 8    | H  | 814.47  | 842.46  | 1930.98 | 17 |
| 9    | V  | 913.54  | 941.53  | 1793.92 | 16 |
| 10   | I  | 1026.62 | 1054.62 | 1694.85 | 15 |
| 11   | N  | 1140.66 | 1168.66 | 1581.76 | 14 |
| 12   | Y  | 1303.73 | 1331.72 | 1467.72 | 13 |
| 13   | V  | 1402.8  | 1430.79 | 1304.66 | 12 |
| 14   | I  | 1515.88 | 1543.87 | 1205.59 | 11 |
| 15   | I  | 1628.96 | 1656.96 | 1092.51 | 10 |
| 16   | D  | 1743.99 | 1771.99 | 979.42  | 9  |
| 17   | E  | 1873.03 | 1901.03 | 864.39  | 8  |
| 18   | G  | 1930.05 | 1958.05 | 735.35  | 7  |
| 19   | S  | 2017.09 | 2045.08 | 678.33  | 6  |
| 20   | D  | 2132.11 | 2160.11 | 591.3   | 5  |
| 21   | S  | 2219.15 | 2247.14 | 476.27  | 4  |
| 22   | L  | 2332.23 | 2360.22 | 389.24  | 3  |
| 23   | E  | 2461.27 | 2489.27 | 276.16  | 2  |
| 24   | K  | -       | -       | 147.11  | 1  |

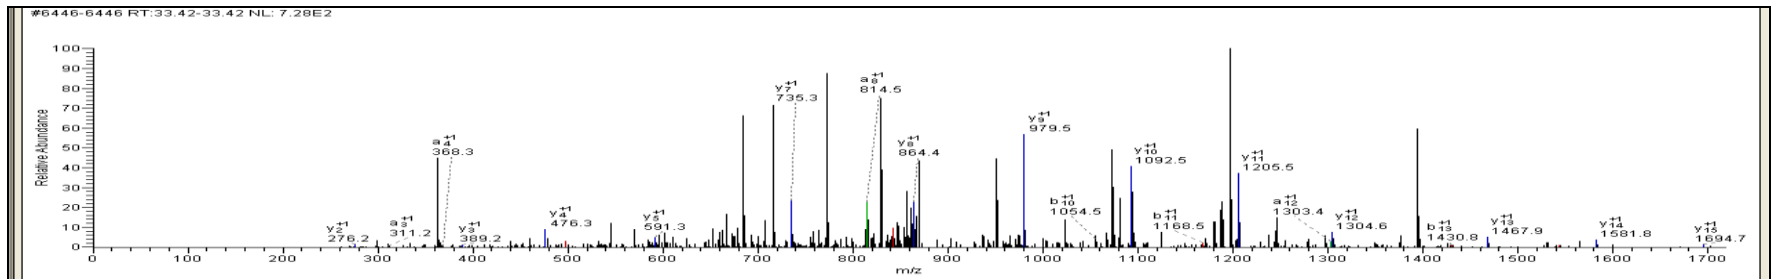

# CG4849 NP\_651605.1 CG4849 CG4849-PA

## K.LIAQVVGDVDTTLSDTLAELNVR.V

| S no | AA | A       | B       | Y       |    |
|------|----|---------|---------|---------|----|
| 1    | L  | 86.1    | 114.09  | -       | 23 |
| 2    | I  | 199.18  | 227.18  | 2329.22 | 22 |
| 3    | A  | 270.22  | 298.21  | 2216.14 | 21 |
| 4    | Q  | 398.28  | 426.27  | 2145.1  | 20 |
| 5    | V  | 497.34  | 525.34  | 2017.04 | 19 |
| 6    | V  | 596.41  | 624.41  | 1917.98 | 18 |
| 7    | G  | 653.43  | 681.43  | 1818.91 | 17 |
| 8    | D  | 768.46  | 796.46  | 1761.89 | 16 |
| 9    | V  | 867.53  | 895.52  | 1646.86 | 15 |
| 10   | D  | 982.56  | 1010.55 | 1547.79 | 14 |
| 11   | T  | 1083.6  | 1111.6  | 1432.76 | 13 |
| 12   | T  | 1184.65 | 1212.65 | 1331.72 | 12 |
| 13   | L  | 1297.74 | 1325.73 | 1230.67 | 11 |
| 14   | S  | 1384.77 | 1412.76 | 1117.58 | 10 |
| 15   | D  | 1499.8  | 1527.79 | 1030.55 | 9  |
| 16   | T  | 1600.84 | 1628.84 | 915.53  | 8  |
| 17   | L  | 1713.93 | 1741.92 | 814.48  | 7  |
| 18   | A  | 1784.96 | 1812.96 | 701.39  | 6  |
| 19   | E  | 1914.01 | 1942    | 630.36  | 5  |
| 20   | L  | 2027.09 | 2055.09 | 501.31  | 4  |
| 21   | N  | 2141.13 | 2169.13 | 388.23  | 3  |
| 22   | V  | 2240.2  | 2268.2  | 274.19  | 2  |
| 23   | R  | -       | -       | 175.12  | 1  |

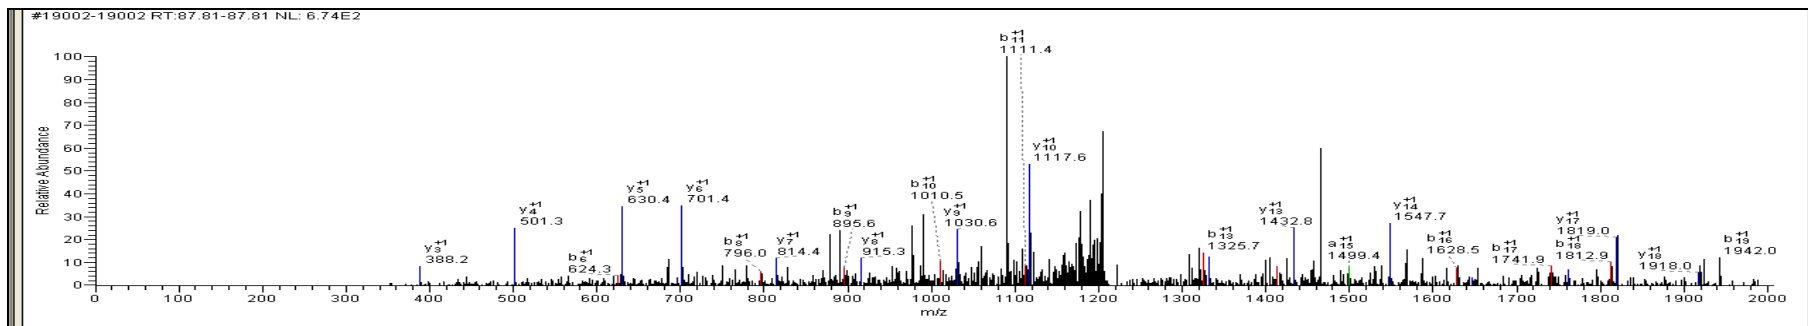

# CG5190 NP\_611335.1 CG5190 CG5190-PA

## K.VLQLEADIAHQEGR.R

|    | AA | A       | B       | Y       |    |
|----|----|---------|---------|---------|----|
| 1  | V  | 72.08   | 100.08  | -       | 14 |
| 2  | L  | 185.16  | 213.16  | 1479.76 | 13 |
| 3  | Q  | 313.22  | 341.22  | 1366.67 | 12 |
| 4  | L  | 426.31  | 454.30  | 1238.61 | 11 |
| 5  | E  | 555.35  | 583.34  | 1125.53 | 10 |
| 6  | A  | 626.39  | 654.38  | 996.49  | 9  |
| 7  | D  | 741.41  | 769.41  | 925.45  | 8  |
| 8  | I  | 854.50  | 882.49  | 810.42  | 7  |
| 9  | A  | 925.54  | 953.53  | 697.34  | 6  |
| 10 | H  | 1062.59 | 1090.59 | 626.30  | 5  |
| 11 | Q  | 1190.65 | 1218.65 | 489.24  | 4  |
| 12 | E  | 1319.70 | 1347.69 | 361.18  | 3  |
| 13 | G  | 1376.72 | 1404.71 | 232.14  | 2  |
| 14 | R  | -       | -       | 175.12  | 1  |

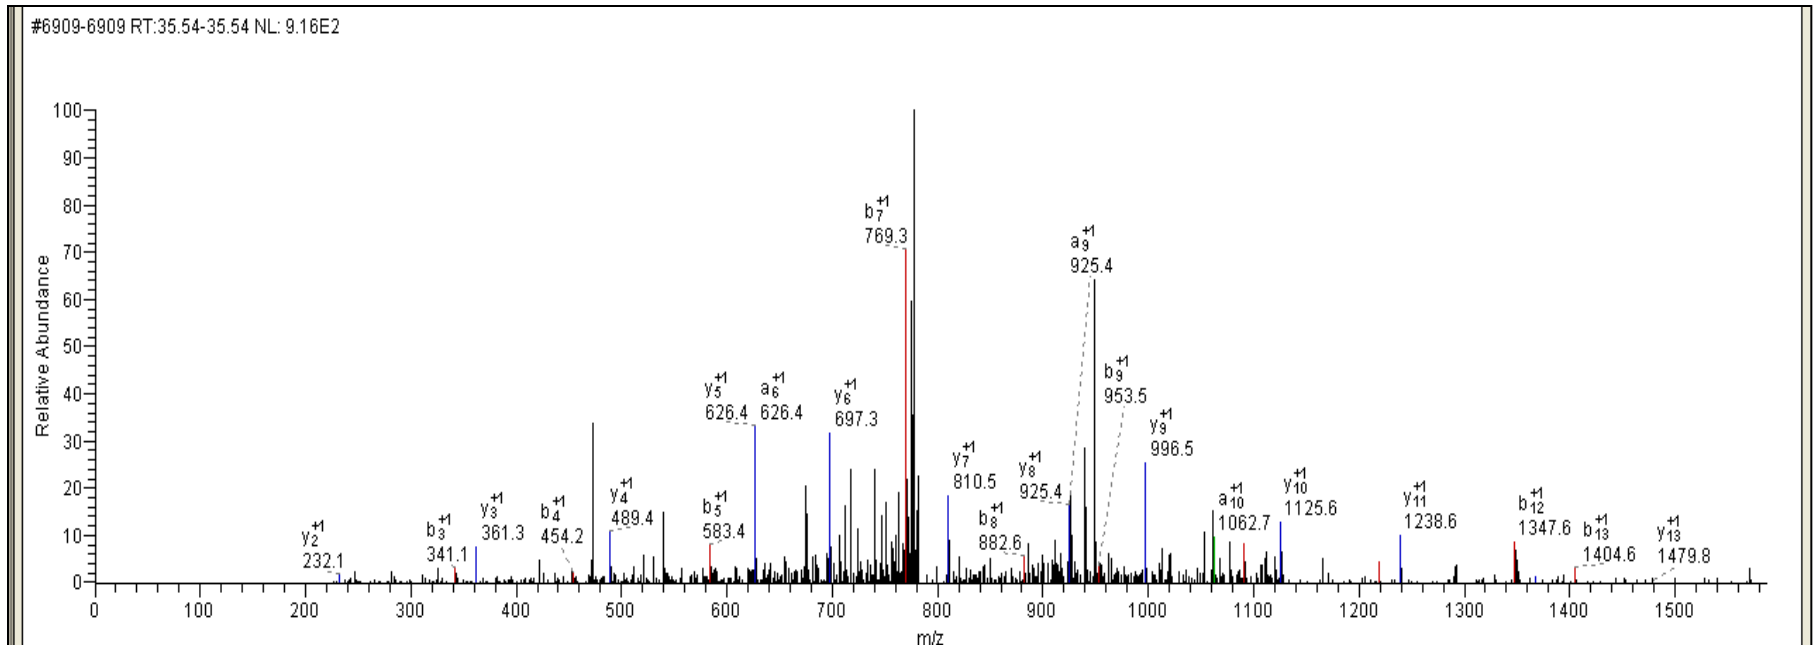

# CG5317 NP\_609543.2 CG5317 CG5317-PA

## R.VIEPFVVYGNPSLSSIR.E

|    | AA | A       | B       | Y       |    |
|----|----|---------|---------|---------|----|
| 1  | V  | 72.08   | 100.08  | -       | 17 |
| 2  | I  | 185.16  | 213.16  | 1777.95 | 16 |
| 3  | E  | 314.21  | 342.20  | 1664.86 | 15 |
| 4  | P  | 411.26  | 439.26  | 1535.82 | 14 |
| 5  | F  | 558.33  | 586.32  | 1438.77 | 13 |
| 6  | V  | 657.40  | 685.39  | 1291.70 | 12 |
| 7  | V  | 756.47  | 784.46  | 1192.63 | 11 |
| 8  | Y  | 919.53  | 947.52  | 1093.56 | 10 |
| 9  | G  | 976.55  | 1004.55 | 930.50  | 9  |
| 10 | N  | 1090.59 | 1118.59 | 873.48  | 8  |
| 11 | P  | 1187.65 | 1215.64 | 759.44  | 7  |
| 12 | S  | 1274.68 | 1302.67 | 662.38  | 6  |
| 13 | L  | 1387.76 | 1415.76 | 575.35  | 5  |
| 14 | S  | 1474.79 | 1502.79 | 462.27  | 4  |
| 15 | S  | 1561.83 | 1589.82 | 375.24  | 3  |
| 16 | I  | 1674.91 | 1702.91 | 288.20  | 2  |
| 17 | R  | -       | -       | 175.12  | 1  |

#15235-15235 RT:70.40-70.40 NL: 7.36E2

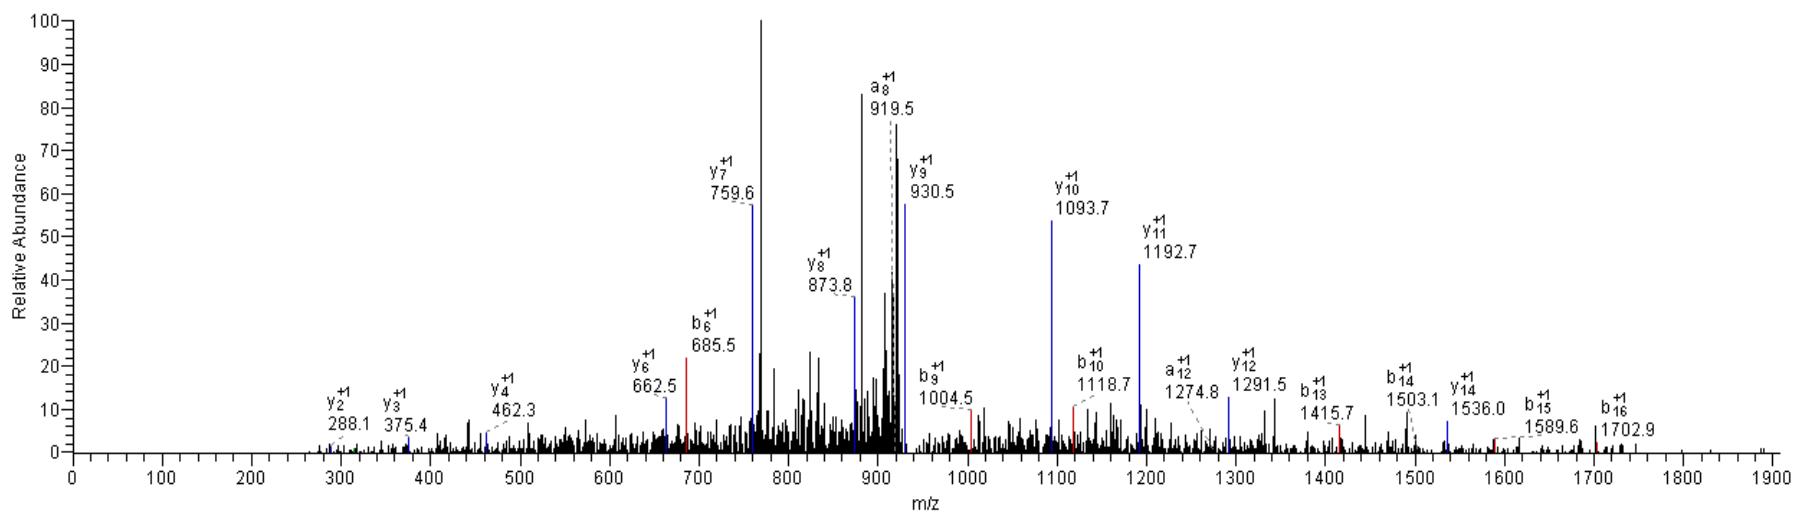

# CG5366 NP\_609389.1 CG5366 CG5366-PA

## R.DLLPTLLPWLYSETK.V

|    | AA | A       | B       | Y       |    |
|----|----|---------|---------|---------|----|
| 1  | D  | 88.04   | 116.03  | -       | 15 |
| 2  | L  | 201.12  | 229.12  | 1673.95 | 14 |
| 3  | L  | 314.21  | 342.20  | 1560.87 | 13 |
| 4  | P  | 411.26  | 439.26  | 1447.78 | 12 |
| 5  | T  | 512.31  | 540.30  | 1350.73 | 11 |
| 6  | L  | 625.39  | 653.39  | 1249.68 | 10 |
| 7  | L  | 738.48  | 766.47  | 1136.60 | 9  |
| 8  | P  | 835.53  | 863.52  | 1023.51 | 8  |
| 9  | W  | 1021.61 | 1049.60 | 926.46  | 7  |
| 10 | L  | 1134.69 | 1162.69 | 740.38  | 6  |
| 11 | Y  | 1297.76 | 1325.75 | 627.30  | 5  |
| 12 | S  | 1384.79 | 1412.78 | 464.24  | 4  |
| 13 | E  | 1513.83 | 1541.83 | 377.20  | 3  |
| 14 | T  | 1614.88 | 1642.87 | 248.16  | 2  |
| 15 | K  | -       | -       | 147.11  | 1  |

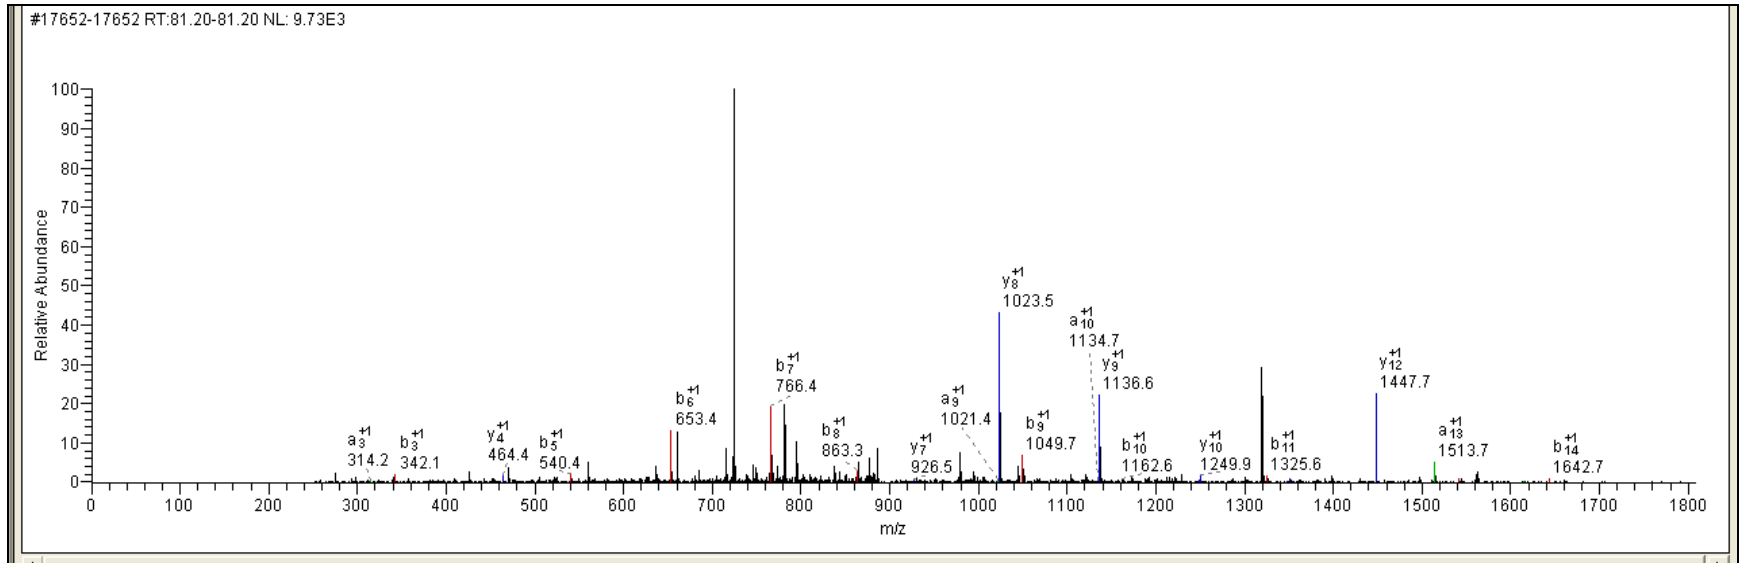

# TwdIJ NP\_651489.1 CG5471 CG5471-PA

## R.GLEDAALALAK.Q

|    | AA | A      | B      | Y       |    |
|----|----|--------|--------|---------|----|
| 1  | G  | 30.03  | 58.03  | -       | 11 |
| 2  | L  | 143.12 | 171.11 | 1014.58 | 10 |
| 3  | E  | 272.16 | 300.16 | 901.50  | 9  |
| 4  | D  | 387.19 | 415.18 | 772.46  | 8  |
| 5  | A  | 458.22 | 486.22 | 657.43  | 7  |
| 6  | A  | 529.26 | 557.26 | 586.39  | 6  |
| 7  | L  | 642.35 | 670.34 | 515.36  | 5  |
| 8  | A  | 713.38 | 741.38 | 402.27  | 4  |
| 9  | L  | 826.47 | 854.46 | 331.23  | 3  |
| 10 | A  | 897.50 | 925.50 | 218.15  | 2  |
| 11 | K  | -      | -      | 147.11  | 1  |

#6346-6346 RT:32.68-32.68 NL: 2.59E3

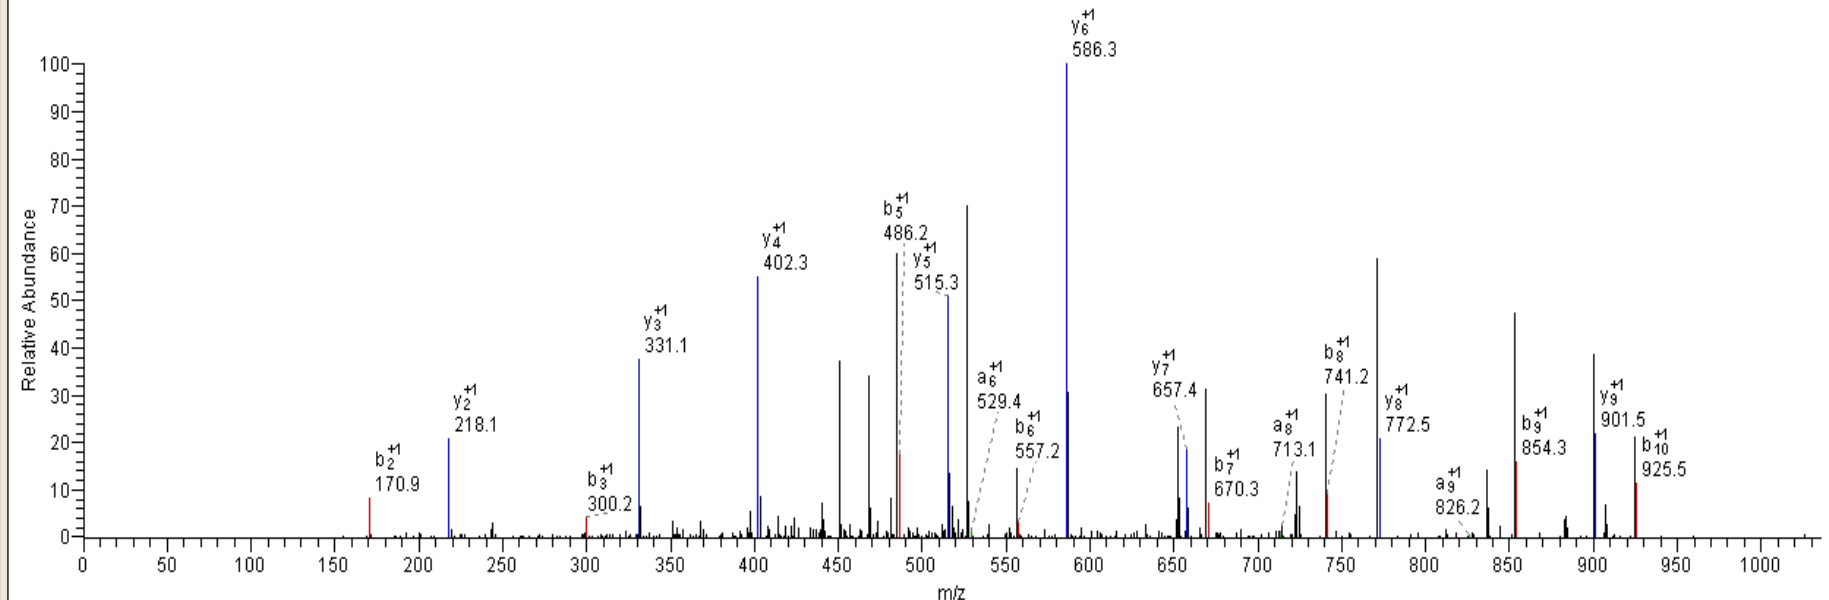



Tb NP\_651494.1 CG5480 CG5480-PA

K.QAAEQQTAIYVLTK.Q

|    | AA | A       | B       | Y       |    |
|----|----|---------|---------|---------|----|
| 1  | Q  | 101.07  | 129.07  | -       | 14 |
| 2  | A  | 172.11  | 200.10  | 1435.78 | 13 |
| 3  | A  | 243.15  | 271.14  | 1364.74 | 12 |
| 4  | E  | 372.19  | 400.18  | 1293.70 | 11 |
| 5  | Q  | 500.25  | 528.24  | 1164.66 | 10 |
| 6  | Q  | 628.30  | 656.30  | 1036.60 | 9  |
| 7  | T  | 729.35  | 757.35  | 908.55  | 8  |
| 8  | A  | 800.39  | 828.38  | 807.50  | 7  |
| 9  | I  | 913.47  | 941.47  | 736.46  | 6  |
| 10 | Y  | 1076.54 | 1104.53 | 623.38  | 5  |
| 11 | V  | 1175.61 | 1203.60 | 460.31  | 4  |
| 12 | L  | 1288.69 | 1316.68 | 361.24  | 3  |
| 13 | T  | 1389.74 | 1417.73 | 248.16  | 2  |
| 14 | K  | -       | -       | 147.11  | 1  |

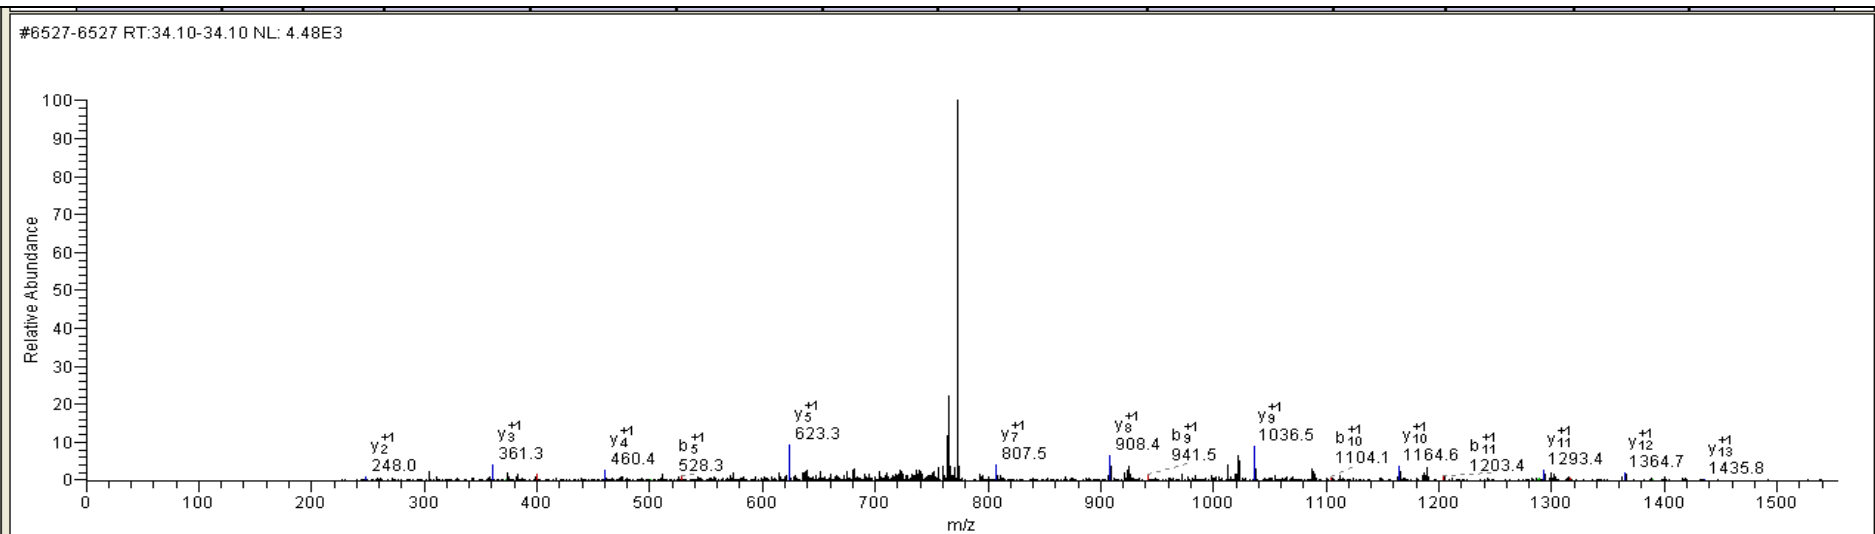

# CG5728 NP\_651245.1 CG5728 CG5728-PA

## K.HDNNDMAQTLDDVVTSYPK.R

|    | AA | A       | B       | Y       |    |
|----|----|---------|---------|---------|----|
| 1  | H  | 110.07  | 138.07  | -       | 20 |
| 2  | D  | 225.10  | 253.09  | 2138.99 | 19 |
| 3  | N  | 339.14  | 367.14  | 2023.96 | 18 |
| 4  | N  | 453.18  | 481.18  | 1909.92 | 17 |
| 5  | D  | 568.21  | 596.21  | 1795.88 | 16 |
| 6  | M  | 699.25  | 727.25  | 1680.85 | 15 |
| 7  | A  | 770.29  | 798.28  | 1549.81 | 14 |
| 8  | Q  | 898.35  | 926.34  | 1478.77 | 13 |
| 9  | T  | 999.39  | 1027.39 | 1350.72 | 12 |
| 10 | L  | 1112.48 | 1140.47 | 1249.67 | 11 |
| 11 | L  | 1225.56 | 1253.56 | 1136.58 | 10 |
| 12 | D  | 1340.59 | 1368.58 | 1023.50 | 9  |
| 13 | D  | 1455.62 | 1483.61 | 908.47  | 8  |
| 14 | V  | 1554.69 | 1582.68 | 793.45  | 7  |
| 15 | V  | 1653.75 | 1681.75 | 694.38  | 6  |
| 16 | T  | 1754.80 | 1782.80 | 595.31  | 5  |
| 17 | S  | 1841.83 | 1869.83 | 494.26  | 4  |
| 18 | Y  | 2004.90 | 2032.89 | 407.23  | 3  |
| 19 | P  | 2101.95 | 2129.94 | 244.17  | 2  |
| 20 | K  | -       | -       | 147.11  | 1  |

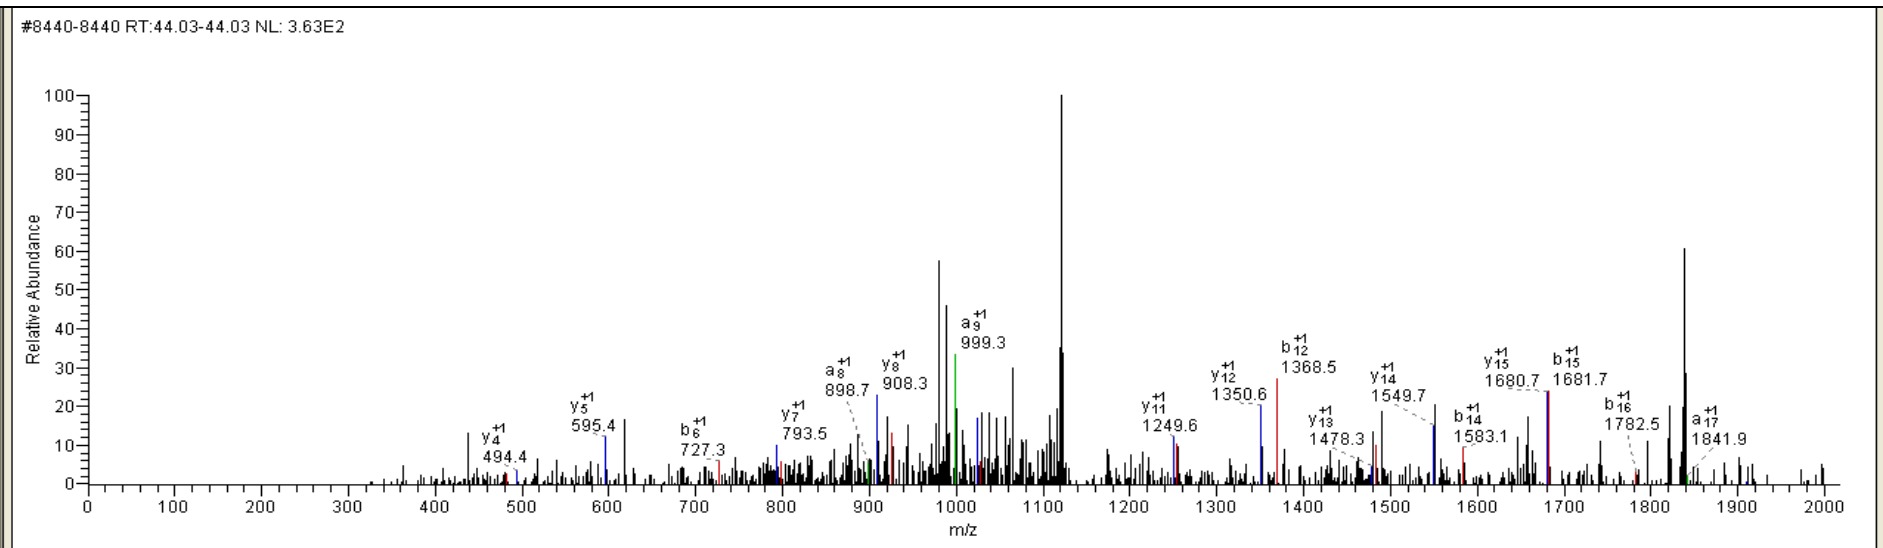

# Nup75 NP\_611300.2 CG5733 CG5733-PA

## R.TRDFLSASELLVNLESK.I

|    | AA | A       | B       | Y       |    |
|----|----|---------|---------|---------|----|
| 1  | T  | 74.06   | 102.05  | -       | 18 |
| 2  | R  | 230.16  | 258.16  | 1934.06 | 17 |
| 3  | D  | 345.19  | 373.18  | 1777.96 | 16 |
| 4  | F  | 492.26  | 520.25  | 1662.93 | 15 |
| 5  | L  | 605.34  | 633.34  | 1515.86 | 14 |
| 6  | S  | 692.37  | 720.37  | 1402.78 | 13 |
| 7  | A  | 763.41  | 791.40  | 1315.75 | 12 |
| 8  | S  | 850.44  | 878.44  | 1244.71 | 11 |
| 9  | E  | 979.48  | 1007.48 | 1157.68 | 10 |
| 10 | L  | 1092.57 | 1120.56 | 1028.64 | 9  |
| 11 | L  | 1205.65 | 1233.65 | 915.55  | 8  |
| 12 | V  | 1304.72 | 1332.72 | 802.47  | 7  |
| 13 | N  | 1418.76 | 1446.76 | 703.40  | 6  |
| 14 | L  | 1531.85 | 1559.84 | 589.36  | 5  |
| 15 | L  | 1644.93 | 1672.93 | 476.27  | 4  |
| 16 | E  | 1773.97 | 1801.97 | 363.19  | 3  |
| 17 | S  | 1861.01 | 1889.00 | 234.14  | 2  |
| 18 | K  | -       | -       | 147.11  | 1  |

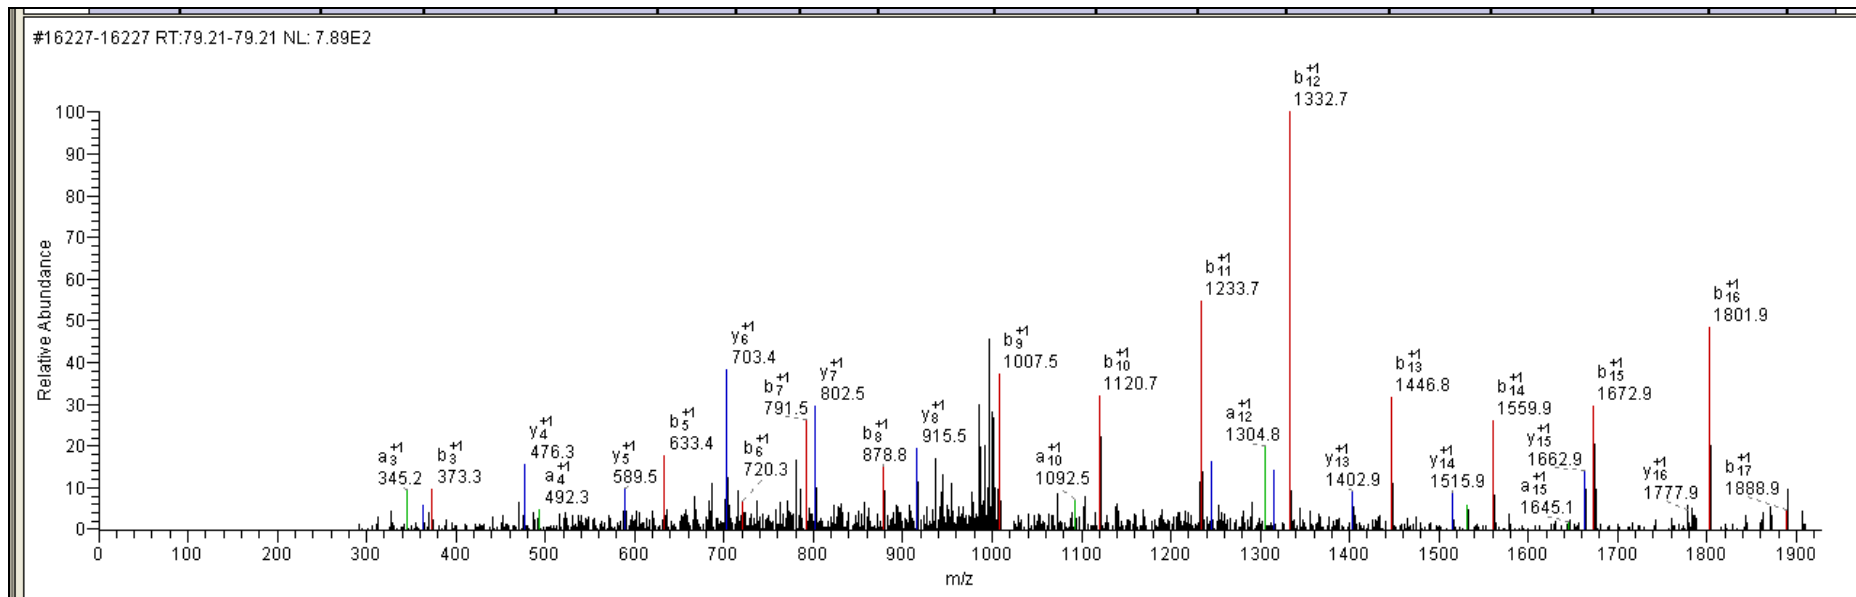

# CG5792 NP\_723771.2 CG5792 CG5792-PB

## R.NVNNQAFPQGHNHNNR.N

|    | AA | A       | B       | Y       |    |
|----|----|---------|---------|---------|----|
| 1  | N  | 87.06   | 115.05  | -       | 16 |
| 2  | V  | 186.12  | 214.12  | 1746.82 | 15 |
| 3  | N  | 300.17  | 328.16  | 1647.75 | 14 |
| 4  | N  | 414.21  | 442.20  | 1533.71 | 13 |
| 5  | Q  | 542.27  | 570.26  | 1419.66 | 12 |
| 6  | A  | 613.31  | 641.30  | 1291.60 | 11 |
| 7  | F  | 760.37  | 788.37  | 1220.57 | 10 |
| 8  | P  | 857.43  | 885.42  | 1073.50 | 9  |
| 9  | Q  | 985.49  | 1013.48 | 976.45  | 8  |
| 10 | G  | 1042.51 | 1070.50 | 848.39  | 7  |
| 11 | H  | 1179.57 | 1207.56 | 791.37  | 6  |
| 12 | N  | 1293.61 | 1321.60 | 654.31  | 5  |
| 13 | H  | 1430.67 | 1458.66 | 540.26  | 4  |
| 14 | N  | 1544.71 | 1572.71 | 403.20  | 3  |
| 15 | N  | 1658.75 | 1686.75 | 289.16  | 2  |
| 16 | R  | -       | -       | 175.12  | 1  |

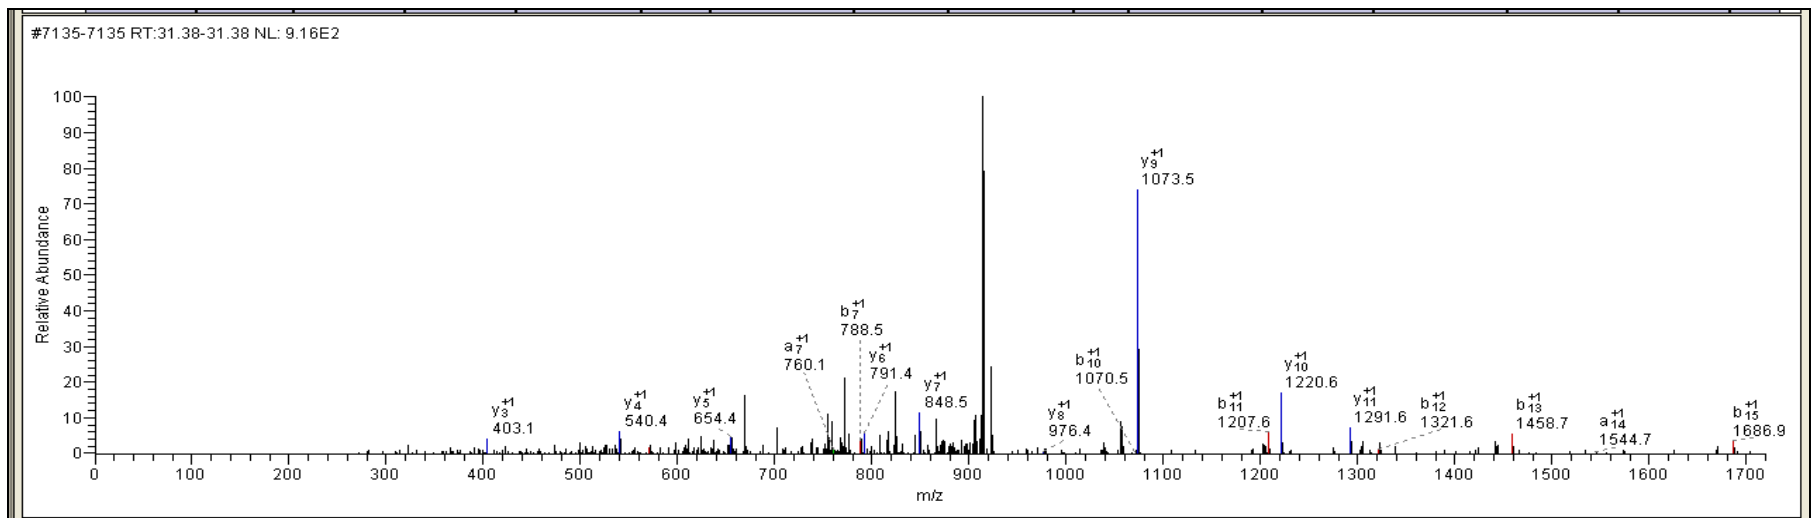

# CG6129 NP\_651216.2 CG6129 CG6129-PB

## R.LSTILKETENHFTK.T

|    | AA | A       | B       | Y       |    |
|----|----|---------|---------|---------|----|
| 1  | L  | 86.10   | 114.09  | -       | 14 |
| 2  | S  | 173.13  | 201.12  | 1547.81 | 13 |
| 3  | T  | 274.18  | 302.17  | 1460.77 | 12 |
| 4  | I  | 387.26  | 415.26  | 1359.73 | 11 |
| 5  | L  | 500.34  | 528.34  | 1246.64 | 10 |
| 6  | K  | 628.44  | 656.43  | 1133.56 | 9  |
| 7  | E  | 757.48  | 785.48  | 1005.46 | 8  |
| 8  | T  | 858.53  | 886.52  | 876.42  | 7  |
| 9  | E  | 987.57  | 1015.57 | 775.37  | 6  |
| 10 | N  | 1101.62 | 1129.61 | 646.33  | 5  |
| 11 | H  | 1238.67 | 1266.67 | 532.29  | 4  |
| 12 | F  | 1385.74 | 1413.74 | 395.23  | 3  |
| 13 | T  | 1486.79 | 1514.78 | 248.16  | 2  |
| 14 | K  | -       | -       | 147.11  | 1  |

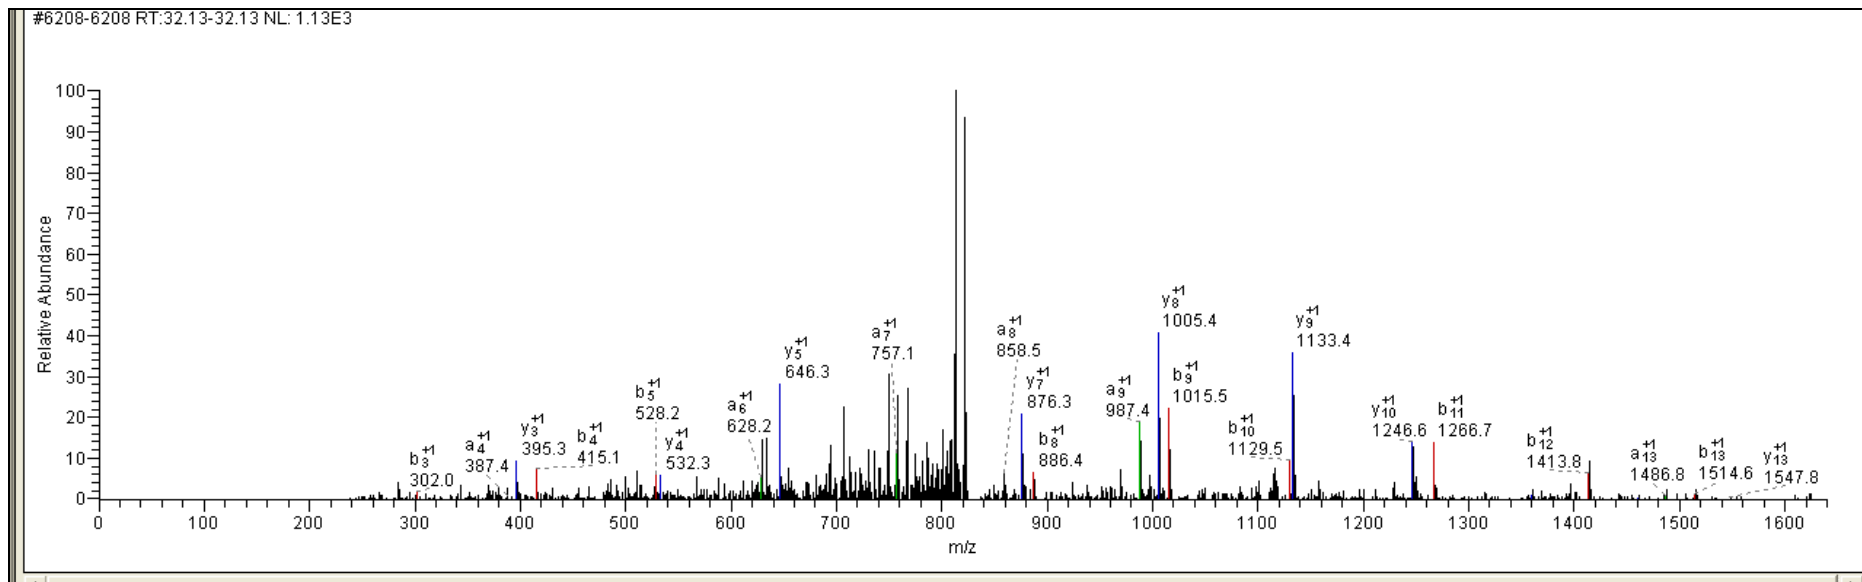

# CG6540 NP\_573314.1 CG6540 CG6540-PA

## R.SNISFATSPGGSSPHELNR.S

|    | AA | A       | B       | Y       |    |
|----|----|---------|---------|---------|----|
| 1  | S  | 60.04   | 88.04   | -       | 19 |
| 2  | N  | 174.09  | 202.08  | 1870.90 | 18 |
| 3  | I  | 287.17  | 315.17  | 1756.86 | 17 |
| 4  | S  | 374.20  | 402.20  | 1643.78 | 16 |
| 5  | F  | 521.27  | 549.27  | 1556.75 | 15 |
| 6  | A  | 592.31  | 620.30  | 1409.68 | 14 |
| 7  | T  | 693.36  | 721.35  | 1338.64 | 13 |
| 8  | S  | 780.39  | 808.38  | 1237.59 | 12 |
| 9  | P  | 877.44  | 905.44  | 1150.56 | 11 |
| 10 | G  | 934.46  | 962.46  | 1053.51 | 10 |
| 11 | G  | 991.48  | 1019.48 | 996.49  | 9  |
| 12 | S  | 1078.52 | 1106.51 | 939.46  | 8  |
| 13 | S  | 1165.55 | 1193.54 | 852.43  | 7  |
| 14 | P  | 1262.60 | 1290.60 | 765.40  | 6  |
| 15 | H  | 1399.66 | 1427.65 | 668.35  | 5  |
| 16 | E  | 1528.70 | 1556.70 | 531.29  | 4  |
| 17 | L  | 1641.79 | 1669.78 | 402.25  | 3  |
| 18 | N  | 1755.83 | 1783.82 | 289.16  | 2  |
| 19 | R  | -       | -       | 175.12  | 1  |

#5900-5900 RT:30.77-30.77 NL: 3.45E3

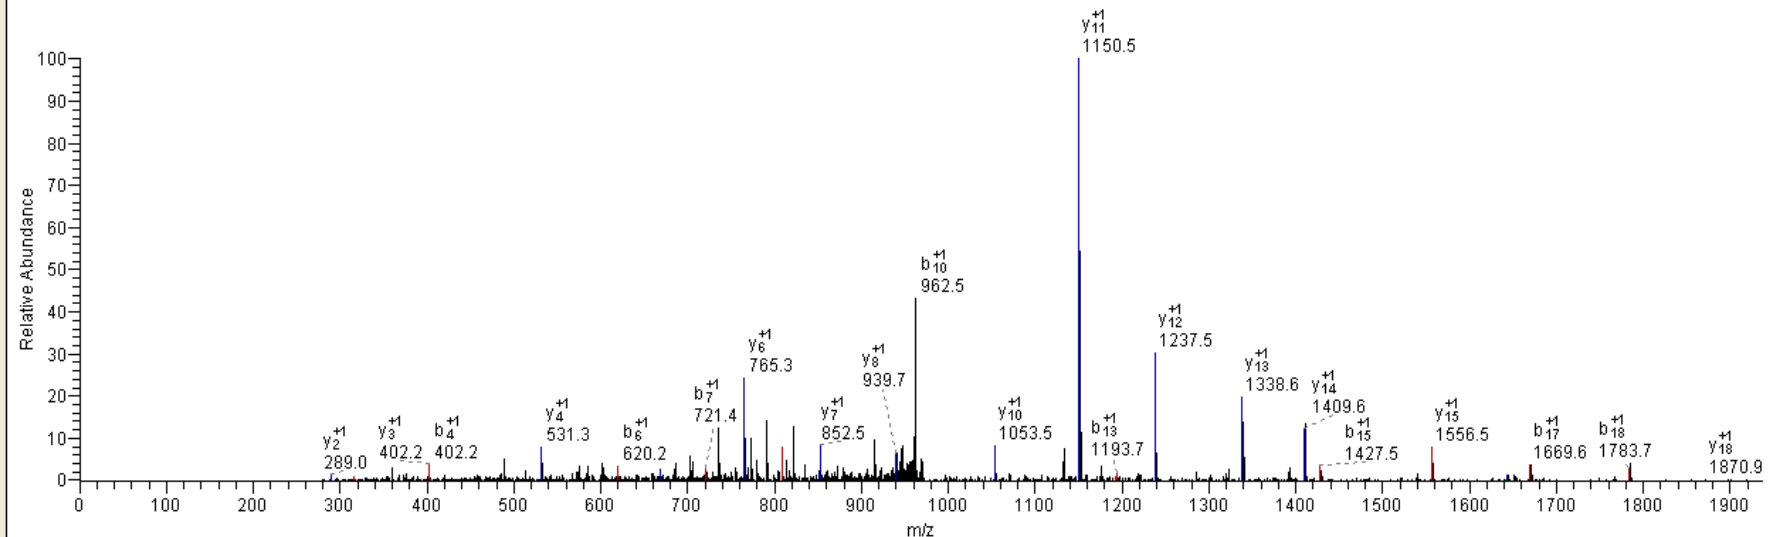

# NP\_648236.1 CG6673 CG6673-PB

## K.NFETALDVFEQITKR.G

|    | AA | A       | B       | Y       |    |
|----|----|---------|---------|---------|----|
| 1  | N  | 87.06   | 115.05  | -       | 16 |
| 2  | F  | 234.12  | 262.12  | 1825.93 | 15 |
| 3  | E  | 363.17  | 391.16  | 1678.86 | 14 |
| 4  | T  | 464.21  | 492.21  | 1549.82 | 13 |
| 5  | A  | 535.25  | 563.25  | 1448.77 | 12 |
| 6  | L  | 648.34  | 676.33  | 1377.74 | 11 |
| 7  | D  | 763.36  | 791.36  | 1264.65 | 10 |
| 8  | V  | 862.43  | 890.43  | 1149.63 | 9  |
| 9  | F  | 1009.50 | 1037.49 | 1050.56 | 8  |
| 10 | E  | 1138.54 | 1166.54 | 903.49  | 7  |
| 11 | Q  | 1266.60 | 1294.60 | 774.45  | 6  |
| 12 | E  | 1395.64 | 1423.64 | 646.39  | 5  |
| 13 | I  | 1508.73 | 1536.72 | 517.35  | 4  |
| 14 | T  | 1609.77 | 1637.77 | 404.26  | 3  |
| 15 | K  | 1737.87 | 1765.86 | 303.21  | 2  |
| 16 | R  | -       | -       | 175.12  | 1  |

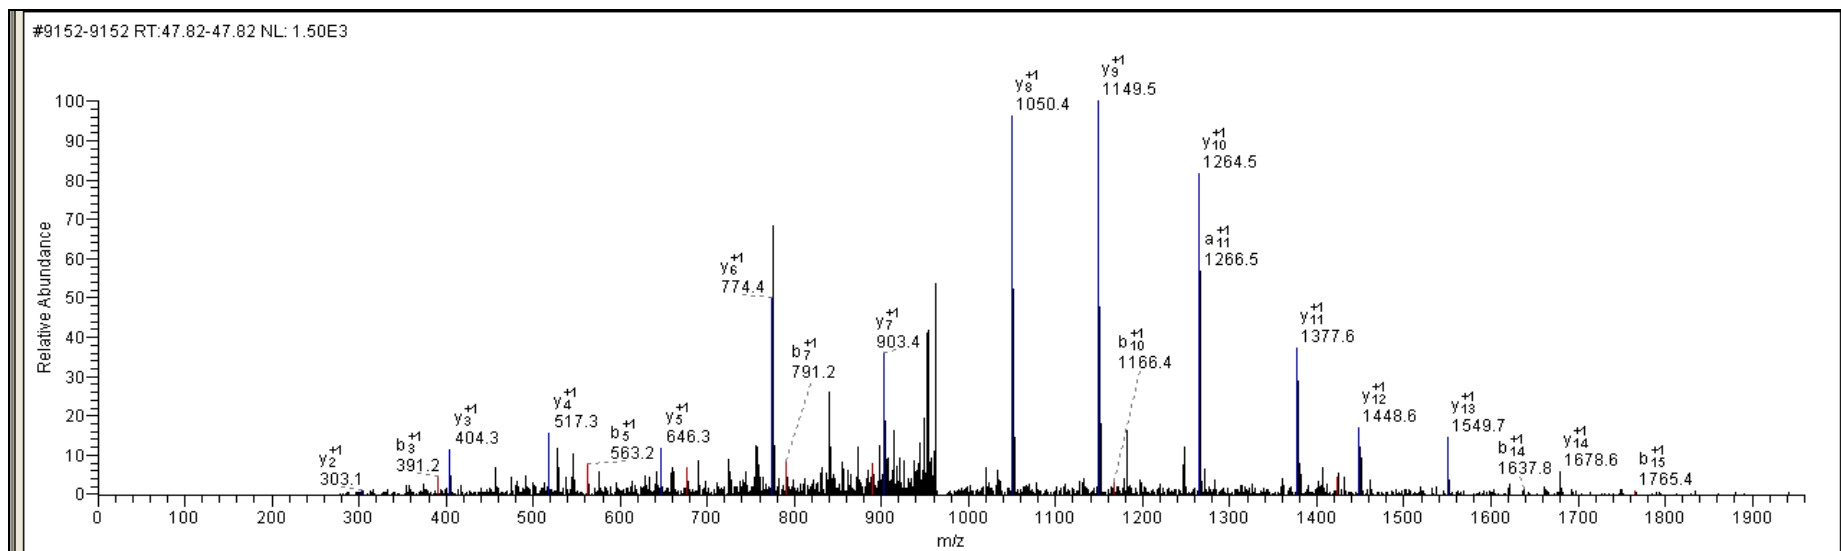

# CG6766 NP\_609537.1 CG6766 CG6766-PA

-.MGKSYVIIAR.I

|    | AA | A      | B      | Y       |    |
|----|----|--------|--------|---------|----|
| 1  | M* | 120.05 | 148.04 | -       | 10 |
| 2  | G  | 177.07 | 205.06 | 1006.60 | 9  |
| 3  | K  | 305.16 | 333.16 | 949.58  | 8  |
| 4  | S  | 392.20 | 420.19 | 821.49  | 7  |
| 5  | Y  | 555.26 | 583.25 | 734.46  | 6  |
| 6  | V  | 654.33 | 682.32 | 571.39  | 5  |
| 7  | I  | 767.41 | 795.41 | 472.32  | 4  |
| 8  | I  | 880.50 | 908.49 | 359.24  | 3  |
| 9  | A  | 951.53 | 979.53 | 246.16  | 2  |
| 10 | R  | -      | -      | 175.12  | 1  |

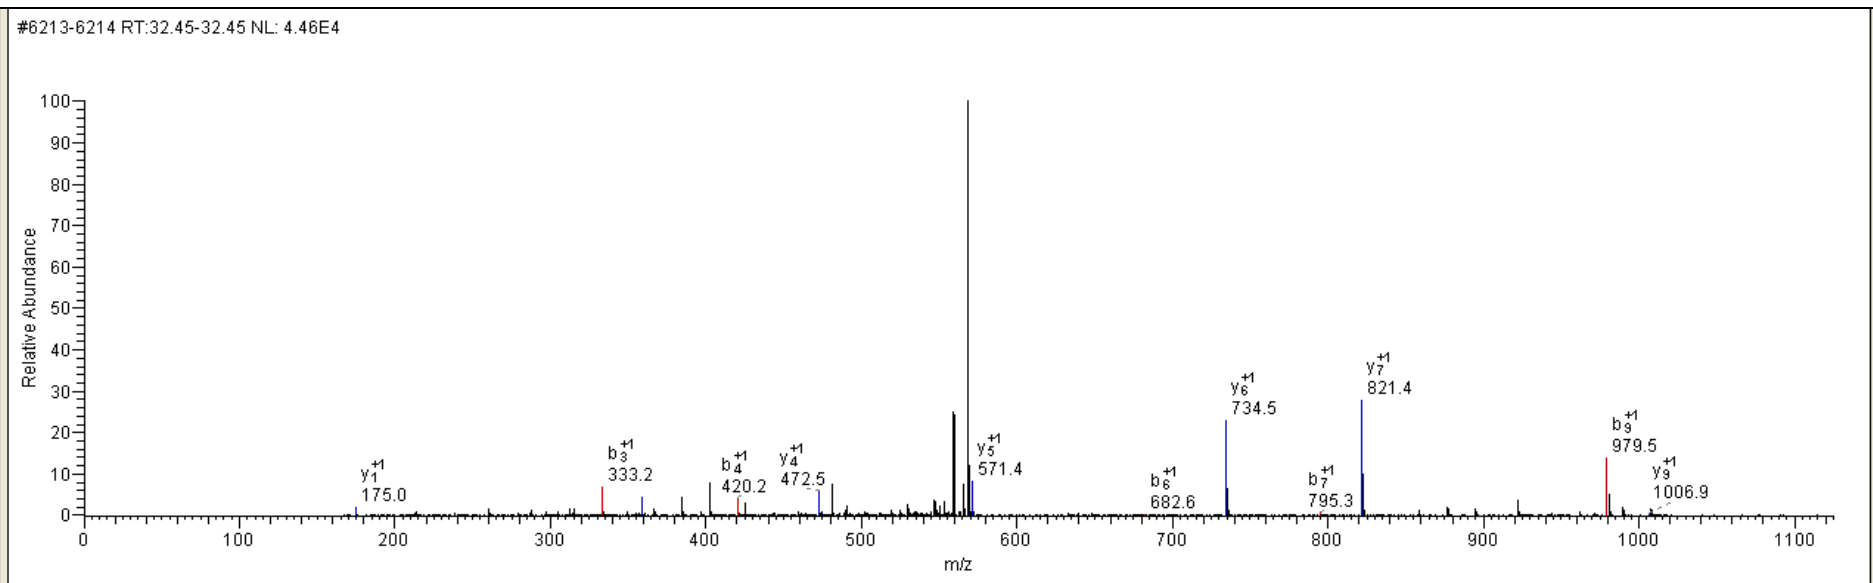



# CG6937 NP\_651066.2 CG6937 CG6937-PA

## K.AGKEIYVSDLTK.A

|    | AA | A       | B       | Y       |    |
|----|----|---------|---------|---------|----|
| 1  | A  | 44.05   | 72.04   | -       | 12 |
| 2  | G  | 101.07  | 129.07  | 1252.68 | 11 |
| 3  | K  | 229.17  | 257.16  | 1195.66 | 10 |
| 4  | E  | 358.21  | 386.20  | 1067.56 | 9  |
| 5  | I  | 471.29  | 499.29  | 938.52  | 8  |
| 6  | Y  | 634.36  | 662.35  | 825.44  | 7  |
| 7  | V  | 733.42  | 761.42  | 662.37  | 6  |
| 8  | S  | 820.46  | 848.45  | 563.30  | 5  |
| 9  | D  | 935.48  | 963.48  | 476.27  | 4  |
| 10 | L  | 1048.57 | 1076.56 | 361.24  | 3  |
| 11 | T  | 1149.62 | 1177.61 | 248.16  | 2  |
| 12 | K  | -       | -       | 147.11  | 1  |

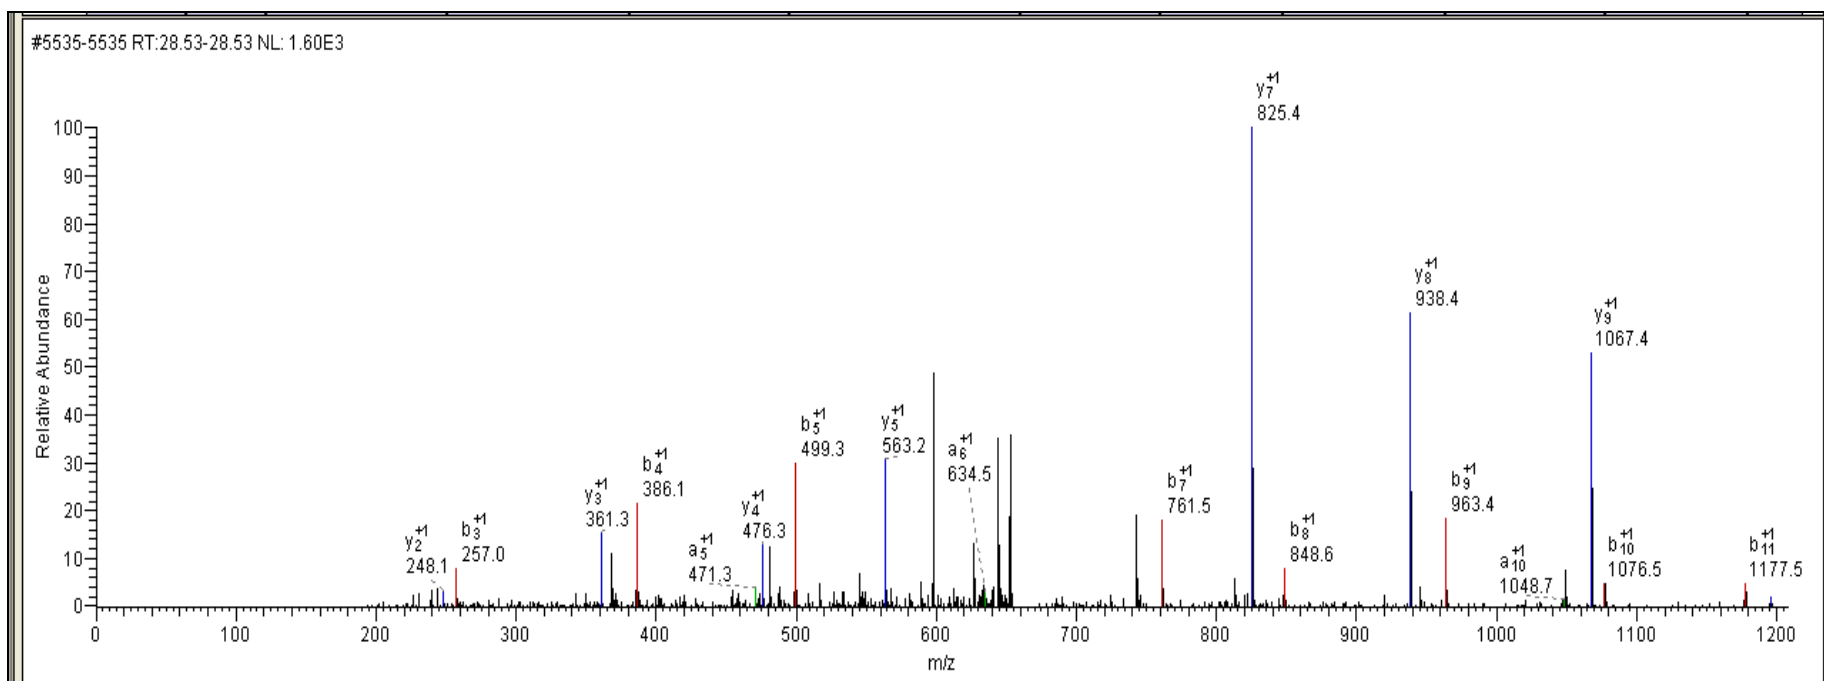

# Nup133 NP\_651080.2 CG6958 CG6958-PA

## R.FQNVFEALADIADDR.I

|    | AA | A       | B       | Y       |    |
|----|----|---------|---------|---------|----|
| 1  | F  | 120.08  | 148.08  | -       | 15 |
| 2  | Q  | 248.14  | 276.13  | 1576.76 | 14 |
| 3  | N  | 362.18  | 390.18  | 1448.70 | 13 |
| 4  | V  | 461.25  | 489.25  | 1334.66 | 12 |
| 5  | F  | 608.32  | 636.31  | 1235.59 | 11 |
| 6  | E  | 737.36  | 765.36  | 1088.52 | 10 |
| 7  | A  | 808.40  | 836.39  | 959.48  | 9  |
| 8  | L  | 921.48  | 949.48  | 888.44  | 8  |
| 9  | A  | 992.52  | 1020.51 | 775.36  | 7  |
| 10 | D  | 1107.55 | 1135.54 | 704.32  | 6  |
| 11 | I  | 1220.63 | 1248.63 | 589.29  | 5  |
| 12 | A  | 1291.67 | 1319.66 | 476.21  | 4  |
| 13 | D  | 1406.70 | 1434.69 | 405.17  | 3  |
| 14 | D  | 1521.72 | 1549.72 | 290.15  | 2  |
| 15 | R  | -       | -       | 175.12  | 1  |

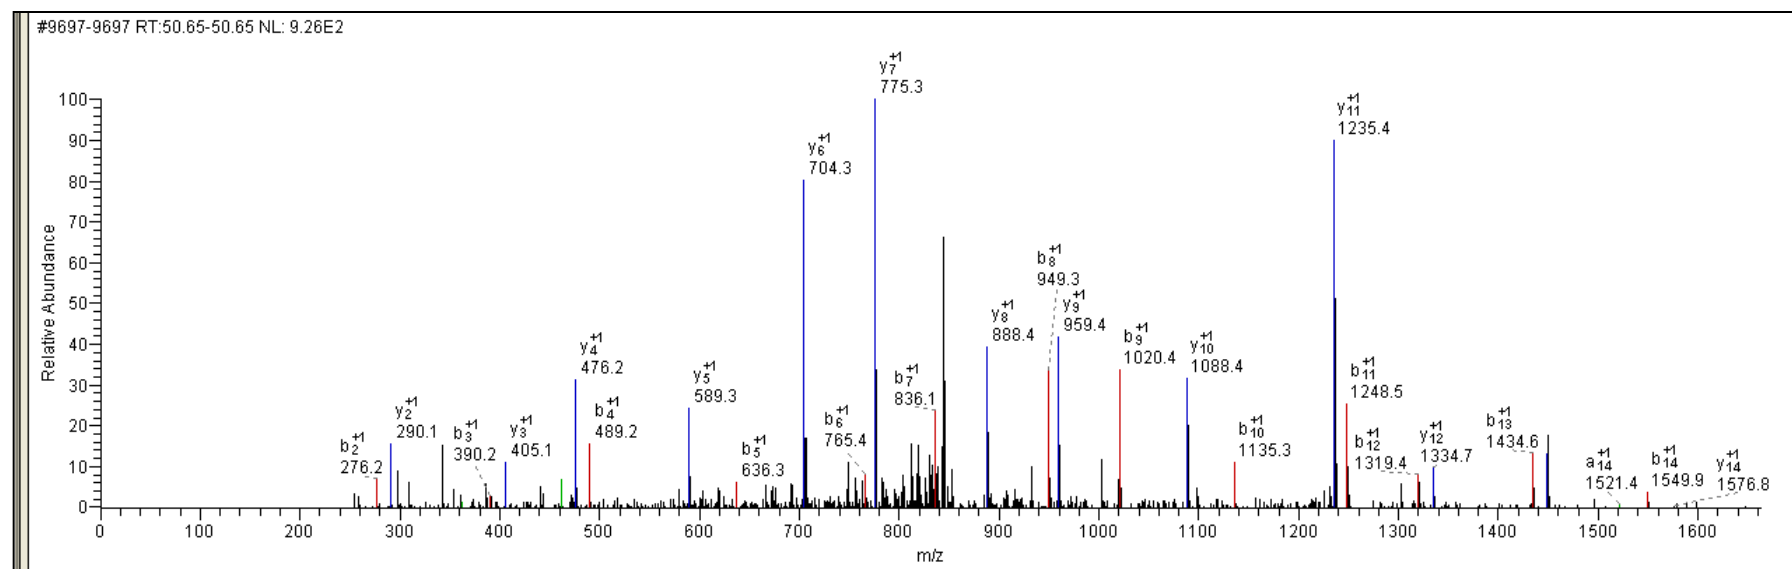

# CG7065 NP\_572529.2 CG7065 CG7065-PA

## K.ISLKDTENIIANLMGTLSK.N

|    | AA | A       | B       | Y       |    |
|----|----|---------|---------|---------|----|
| 1  | I  | 86.10   | 114.09  | -       | 19 |
| 2  | S  | 173.13  | 201.12  | 1948.04 | 18 |
| 3  | L  | 286.21  | 314.21  | 1861.01 | 17 |
| 4  | K  | 414.31  | 442.30  | 1747.93 | 16 |
| 5  | D  | 529.33  | 557.33  | 1619.83 | 15 |
| 6  | T  | 630.38  | 658.38  | 1504.80 | 14 |
| 7  | E  | 759.42  | 787.42  | 1403.76 | 13 |
| 8  | N  | 873.47  | 901.46  | 1274.71 | 12 |
| 9  | I  | 986.55  | 1014.55 | 1160.67 | 11 |
| 10 | I  | 1099.64 | 1127.63 | 1047.59 | 10 |
| 11 | A  | 1170.67 | 1198.67 | 934.50  | 9  |
| 12 | N  | 1284.72 | 1312.71 | 863.47  | 8  |
| 13 | L  | 1397.80 | 1425.79 | 749.42  | 7  |
| 14 | M  | 1528.84 | 1556.84 | 636.34  | 6  |
| 15 | G  | 1585.86 | 1613.86 | 505.30  | 5  |
| 16 | T  | 1686.91 | 1714.90 | 448.28  | 4  |
| 17 | L  | 1799.99 | 1827.99 | 347.23  | 3  |
| 18 | S  | 1887.03 | 1915.02 | 234.14  | 2  |
| 19 | K  | -       | -       | 147.11  | 1  |

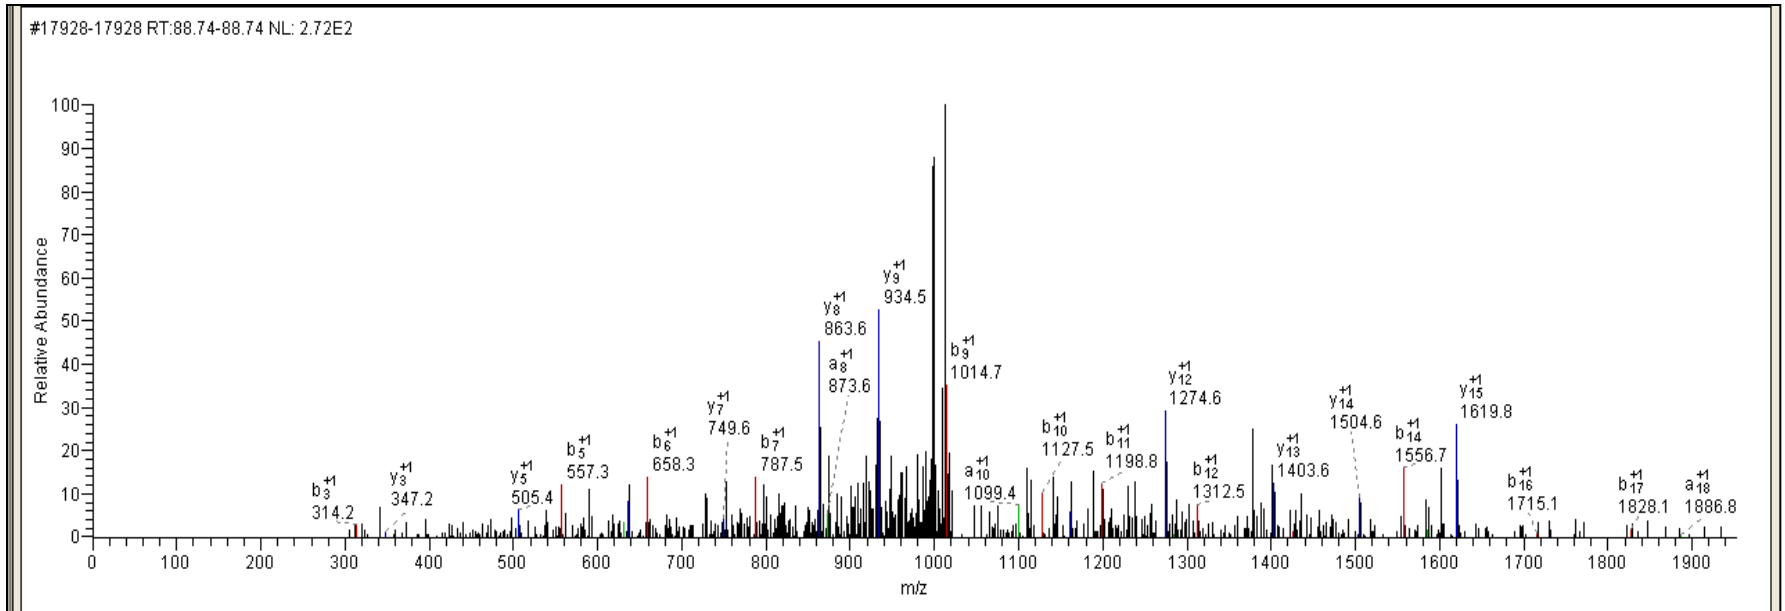

# CG7137 NP\_611400.1 CG7137 CG7137-PA

## R.YINEQLYSTTSR.K

|    | AA | A       | B       | Y       |    |
|----|----|---------|---------|---------|----|
| 1  | Y  | 136.08  | 164.07  | -       | 12 |
| 2  | I  | 249.16  | 277.15  | 1311.65 | 11 |
| 3  | N  | 363.20  | 391.20  | 1198.57 | 10 |
| 4  | E  | 492.25  | 520.24  | 1084.53 | 9  |
| 5  | Q  | 620.30  | 648.30  | 955.48  | 8  |
| 6  | L  | 733.39  | 761.38  | 827.43  | 7  |
| 7  | Y  | 896.45  | 924.45  | 714.34  | 6  |
| 8  | S  | 983.48  | 1011.48 | 551.28  | 5  |
| 9  | T  | 1084.53 | 1112.53 | 464.25  | 4  |
| 10 | T  | 1185.58 | 1213.57 | 363.20  | 3  |
| 11 | S  | 1272.61 | 1300.61 | 262.15  | 2  |
| 12 | R  | -       | -       | 175.12  | 1  |

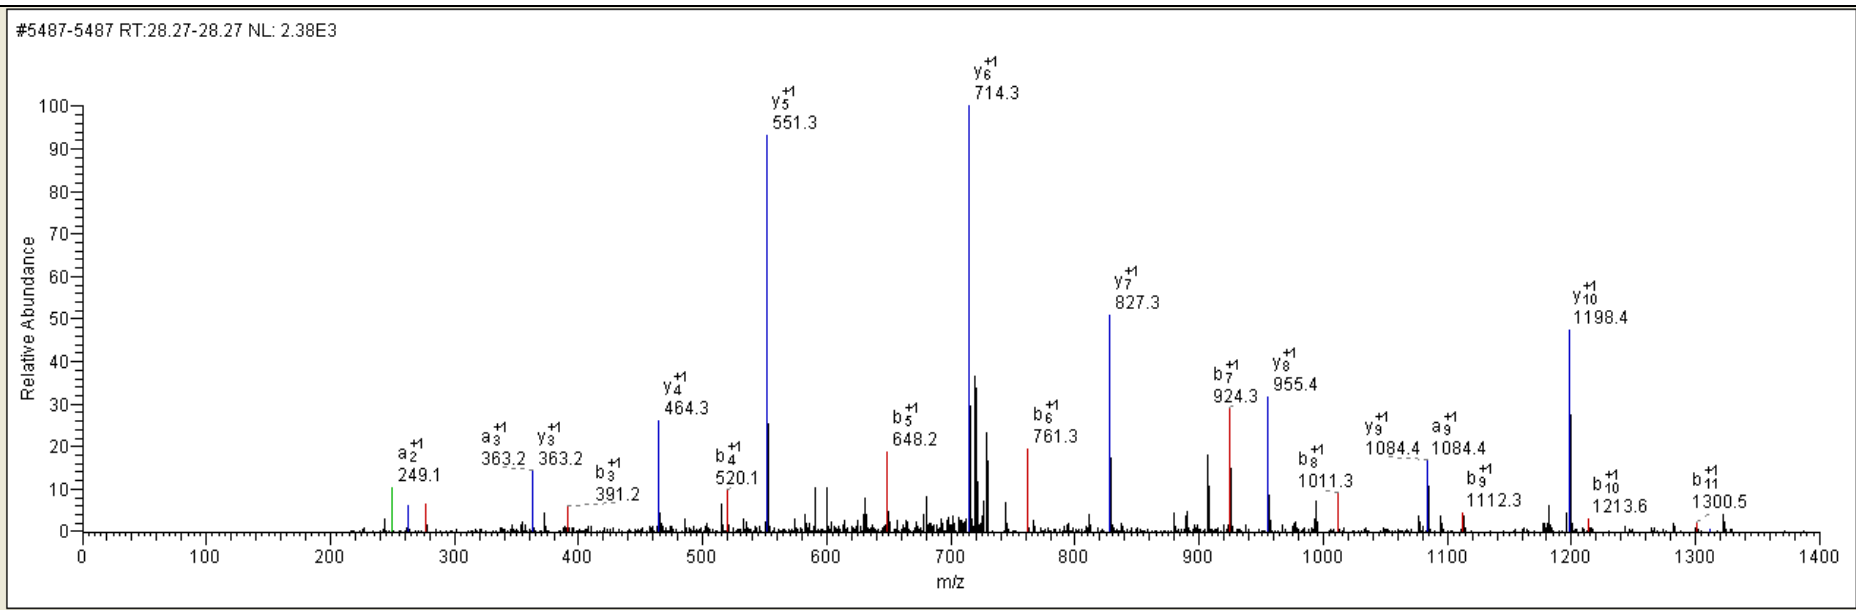

# CG7154 NP\_609148.1 CG7154 CG7154-PA

## K.THFEPYVDDLTGEEILAQVQNAAQQAK.Q

| S no | AA | A       | B       | Y       |    |
|------|----|---------|---------|---------|----|
| 1    | T  | 74.06   | 102.05  | -       | 27 |
| 2    | H  | 211.12  | 239.11  | 2914.42 | 26 |
| 3    | F  | 358.19  | 386.18  | 2777.36 | 25 |
| 4    | E  | 487.23  | 515.22  | 2630.29 | 24 |
| 5    | P  | 584.28  | 612.28  | 2501.25 | 23 |
| 6    | Y  | 747.35  | 775.34  | 2404.2  | 22 |
| 7    | V  | 846.41  | 874.41  | 2241.14 | 21 |
| 8    | D  | 961.44  | 989.44  | 2142.07 | 20 |
| 9    | D  | 1076.47 | 1104.46 | 2027.04 | 19 |
| 10   | L  | 1189.55 | 1217.55 | 1912.01 | 18 |
| 11   | T  | 1290.6  | 1318.6  | 1798.93 | 17 |
| 12   | G  | 1347.62 | 1375.62 | 1697.88 | 16 |
| 13   | E  | 1476.66 | 1504.66 | 1640.86 | 15 |
| 14   | E  | 1605.71 | 1633.7  | 1511.82 | 14 |
| 15   | I  | 1718.79 | 1746.79 | 1382.78 | 13 |
| 16   | L  | 1831.87 | 1859.87 | 1269.69 | 12 |
| 17   | A  | 1902.91 | 1930.91 | 1156.61 | 11 |
| 18   | Q  | 2030.97 | 2058.97 | 1085.57 | 10 |
| 19   | V  | 2130.04 | 2158.03 | 957.51  | 9  |
| 20   | Q  | 2258.1  | 2286.09 | 858.44  | 8  |
| 21   | N  | 2372.14 | 2400.14 | 730.38  | 7  |
| 22   | A  | 2443.18 | 2471.17 | 616.34  | 6  |
| 23   | A  | 2514.21 | 2542.21 | 545.3   | 5  |
| 24   | Q  | 2642.27 | 2670.27 | 474.27  | 4  |
| 25   | Q  | 2770.33 | 2798.33 | 346.21  | 3  |
| 26   | A  | 2841.37 | 2869.36 | 218.15  | 2  |
| 27   | K  | -       | -       | 147.11  | 1  |

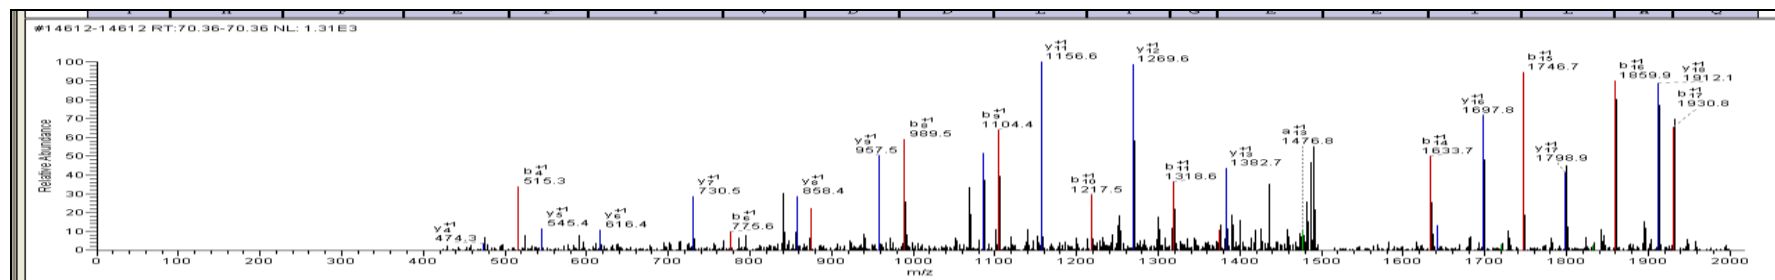

# CG7671 NP\_650716.2 CG7671 CG7671-PA

## R.SLVDVEGVLSNVRK.S

|    | AA | A       | B       | Y       |    |
|----|----|---------|---------|---------|----|
| 1  | S  | 60.04   | 88.04   | -       | 14 |
| 2  | L  | 173.13  | 201.12  | 1427.82 | 13 |
| 3  | V  | 272.20  | 300.19  | 1314.74 | 12 |
| 4  | D  | 387.22  | 415.22  | 1215.67 | 11 |
| 5  | V  | 486.29  | 514.29  | 1100.64 | 10 |
| 6  | E  | 615.33  | 643.33  | 1001.57 | 9  |
| 7  | G  | 672.36  | 700.35  | 872.53  | 8  |
| 8  | V  | 771.42  | 799.42  | 815.51  | 7  |
| 9  | L  | 884.51  | 912.50  | 716.44  | 6  |
| 10 | S  | 971.54  | 999.54  | 603.36  | 5  |
| 11 | N  | 1085.58 | 1113.58 | 516.33  | 4  |
| 12 | V  | 1184.65 | 1212.65 | 402.28  | 3  |
| 13 | R  | 1340.75 | 1368.75 | 303.21  | 2  |
| 14 | K  | -       | -       | 147.11  | 1  |

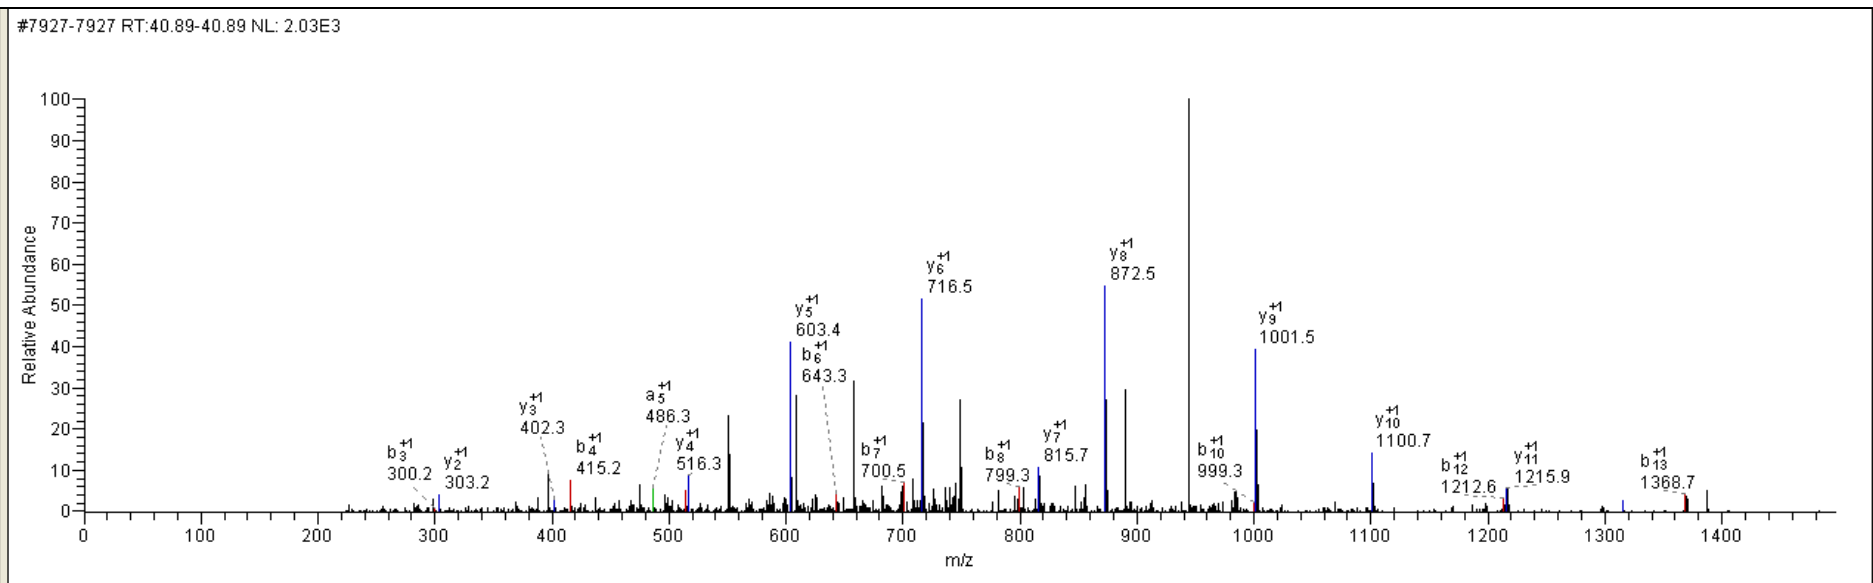

# NP\_651760.1 CG7911 CG7911-PA

## K.TGEFNVVQAETNINDDGEKK.T

|    | AA | A       | B       | Y       |    |
|----|----|---------|---------|---------|----|
| 1  | T  | 74.06   | 102.05  | -       | 20 |
| 2  | G  | 131.08  | 159.08  | 2106.99 | 19 |
| 3  | E  | 260.12  | 288.12  | 2049.97 | 18 |
| 4  | F  | 407.19  | 435.19  | 1920.93 | 17 |
| 5  | N  | 521.24  | 549.23  | 1773.86 | 16 |
| 6  | V  | 620.30  | 648.30  | 1659.82 | 15 |
| 7  | V  | 719.37  | 747.37  | 1560.75 | 14 |
| 8  | Q  | 847.43  | 875.43  | 1461.68 | 13 |
| 9  | A  | 918.47  | 946.46  | 1333.62 | 12 |
| 10 | E  | 1047.51 | 1075.51 | 1262.59 | 11 |
| 11 | T  | 1148.56 | 1176.55 | 1133.54 | 10 |
| 12 | N  | 1262.60 | 1290.60 | 1032.50 | 9  |
| 13 | I  | 1375.69 | 1403.68 | 918.45  | 8  |
| 14 | N  | 1489.73 | 1517.72 | 805.37  | 7  |
| 15 | D  | 1604.76 | 1632.75 | 691.33  | 6  |
| 16 | D  | 1719.78 | 1747.78 | 576.30  | 5  |
| 17 | G  | 1776.80 | 1804.80 | 461.27  | 4  |
| 18 | E  | 1905.85 | 1933.84 | 404.25  | 3  |
| 19 | K  | 2033.94 | 2061.94 | 275.21  | 2  |
| 20 | K  | -       | -       | 147.11  | 1  |

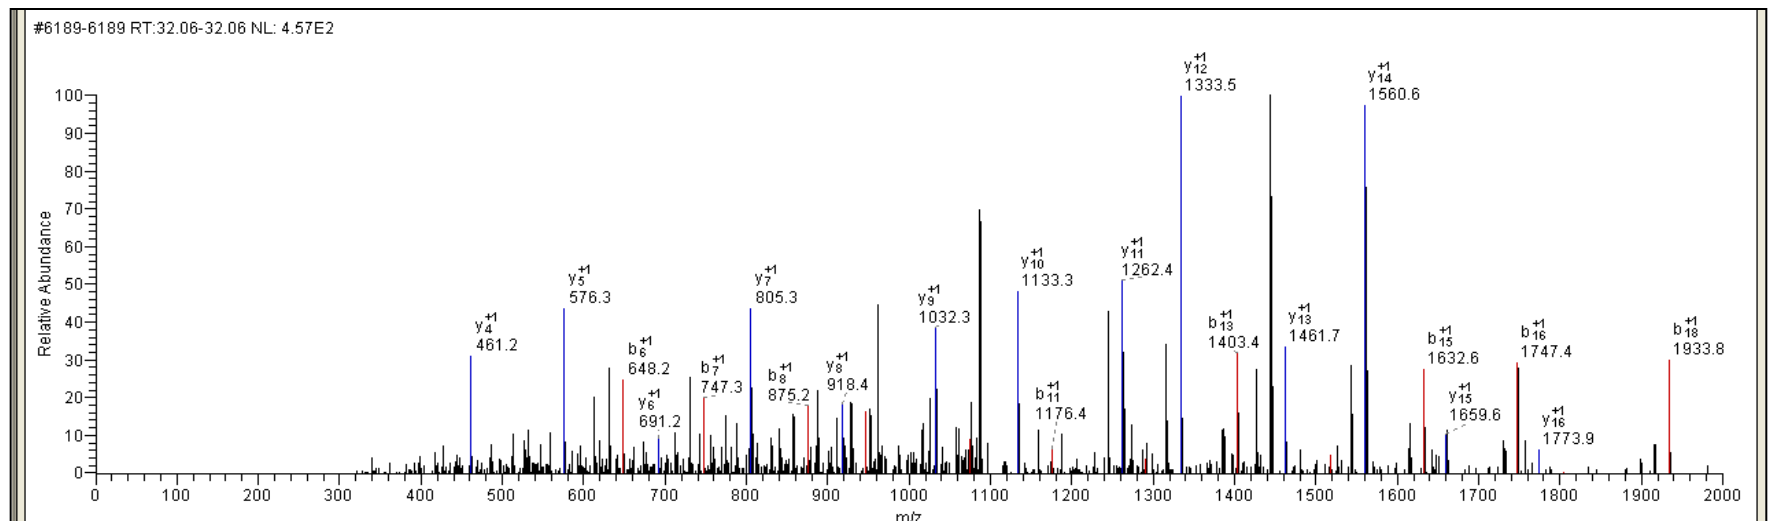

# NP\_651768.1CG7946 CG7946-PA

## R.FIEELIEHEDALFMER.D

|    | AA | A       | B       | Y       |    |
|----|----|---------|---------|---------|----|
| 1  | F  | 120.08  | 148.08  | -       | 16 |
| 2  | I  | 233.16  | 261.16  | 1889.89 | 15 |
| 3  | E  | 362.21  | 390.20  | 1776.81 | 14 |
| 4  | E  | 491.25  | 519.24  | 1647.77 | 13 |
| 5  | L  | 604.33  | 632.33  | 1518.73 | 12 |
| 6  | I  | 717.42  | 745.41  | 1405.64 | 11 |
| 7  | E  | 846.46  | 874.46  | 1292.56 | 10 |
| 8  | H  | 983.52  | 1011.51 | 1163.51 | 9  |
| 9  | E  | 1112.56 | 1140.56 | 1026.46 | 8  |
| 10 | D  | 1227.59 | 1255.58 | 897.41  | 7  |
| 11 | A  | 1298.63 | 1326.62 | 782.39  | 6  |
| 12 | L  | 1411.71 | 1439.71 | 711.35  | 5  |
| 13 | F  | 1558.78 | 1586.77 | 598.27  | 4  |
| 14 | M* | 1705.81 | 1733.81 | 451.20  | 3  |
| 15 | E  | 1834.86 | 1862.85 | 304.16  | 2  |
| 16 | R  | -       | -       | 175.12  | 1  |

#8598-8598 RT:44.91-44.91 NL: 2.59E3

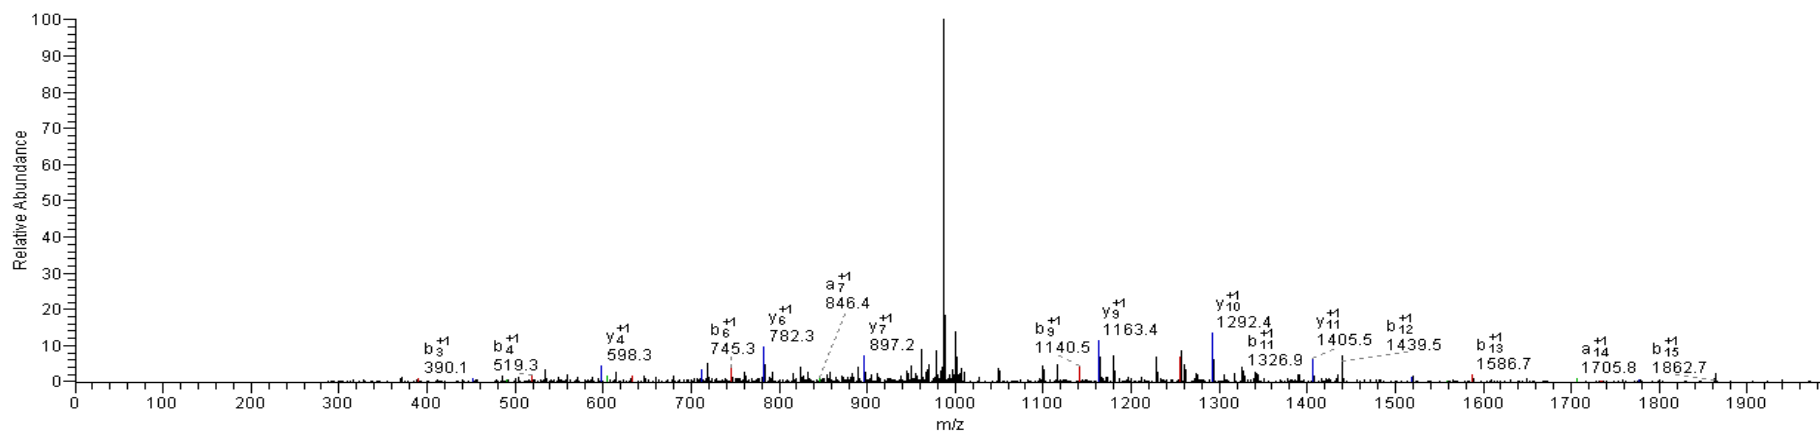



CG8036 NP\_649812.2 CG8036 CG8036-PB

R.VVVVEDHYQQGGLGEAVLSALAGER.N

| S no | AA | A       | B       | Y       |    |
|------|----|---------|---------|---------|----|
| 1    | V  | 72.08   | 100.08  | -       | 25 |
| 2    | V  | 171.15  | 199.14  | 2497.27 | 24 |
| 3    | V  | 270.22  | 298.21  | 2398.2  | 23 |
| 4    | V  | 369.29  | 397.28  | 2299.13 | 22 |
| 5    | E  | 498.33  | 526.32  | 2200.06 | 21 |
| 6    | D  | 613.36  | 641.35  | 2071.02 | 20 |
| 7    | H  | 750.41  | 778.41  | 1955.99 | 19 |
| 8    | Y  | 913.48  | 941.47  | 1818.93 | 18 |
| 9    | Q  | 1041.54 | 1069.53 | 1655.87 | 17 |
| 10   | Q  | 1169.59 | 1197.59 | 1527.81 | 16 |
| 11   | G  | 1226.62 | 1254.61 | 1399.75 | 15 |
| 12   | G  | 1283.64 | 1311.63 | 1342.73 | 14 |
| 13   | L  | 1396.72 | 1424.72 | 1285.71 | 13 |
| 14   | G  | 1453.74 | 1481.74 | 1172.63 | 12 |
| 15   | E  | 1582.79 | 1610.78 | 1115.61 | 11 |
| 16   | A  | 1653.82 | 1681.82 | 986.56  | 10 |
| 17   | V  | 1752.89 | 1780.89 | 915.53  | 9  |
| 18   | L  | 1865.98 | 1893.97 | 816.46  | 8  |
| 19   | S  | 1953.01 | 1981    | 703.37  | 7  |
| 20   | A  | 2024.04 | 2052.04 | 616.34  | 6  |
| 21   | L  | 2137.13 | 2165.12 | 545.3   | 5  |
| 22   | A  | 2208.17 | 2236.16 | 432.22  | 4  |
| 23   | G  | 2265.19 | 2293.18 | 361.18  | 3  |
| 24   | E  | 2394.23 | 2422.22 | 304.16  | 2  |
| 25   | R  | -       | -       | 175.12  | 1  |

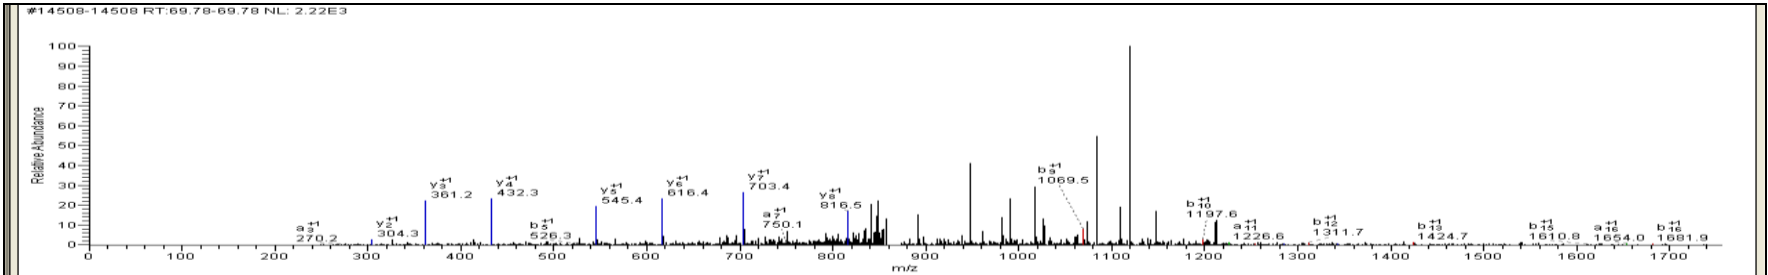

# CG8258 NP\_610418.1 CG8258 CG8258-PA

## K.SADELLSFSSGEESLLESQIK.A

|    | AA | A       | B       | Y       |    |
|----|----|---------|---------|---------|----|
| 1  | S  | 60.04   | 88.04   | -       | 21 |
| 2  | A  | 131.08  | 159.08  | 2182.08 | 20 |
| 3  | D  | 246.11  | 274.10  | 2111.04 | 19 |
| 4  | E  | 375.15  | 403.15  | 1996.01 | 18 |
| 5  | L  | 488.24  | 516.23  | 1866.97 | 17 |
| 6  | L  | 601.32  | 629.31  | 1753.89 | 16 |
| 7  | S  | 688.35  | 716.35  | 1640.80 | 15 |
| 8  | F  | 835.42  | 863.41  | 1553.77 | 14 |
| 9  | S  | 922.45  | 950.45  | 1406.70 | 13 |
| 10 | S  | 1009.48 | 1037.48 | 1319.67 | 12 |
| 11 | G  | 1066.51 | 1094.50 | 1232.64 | 11 |
| 12 | E  | 1195.55 | 1223.54 | 1175.62 | 10 |
| 13 | E  | 1324.59 | 1352.59 | 1046.57 | 9  |
| 14 | S  | 1411.62 | 1439.62 | 917.53  | 8  |
| 15 | L  | 1524.71 | 1552.70 | 830.50  | 7  |
| 16 | L  | 1637.79 | 1665.79 | 717.41  | 6  |
| 17 | E  | 1766.83 | 1794.83 | 604.33  | 5  |
| 18 | S  | 1853.87 | 1881.86 | 475.29  | 4  |
| 19 | Q  | 1981.92 | 2009.92 | 388.26  | 3  |
| 20 | I  | 2095.01 | 2123.00 | 260.20  | 2  |
| 21 | K  | -       | -       | 147.11  | 1  |

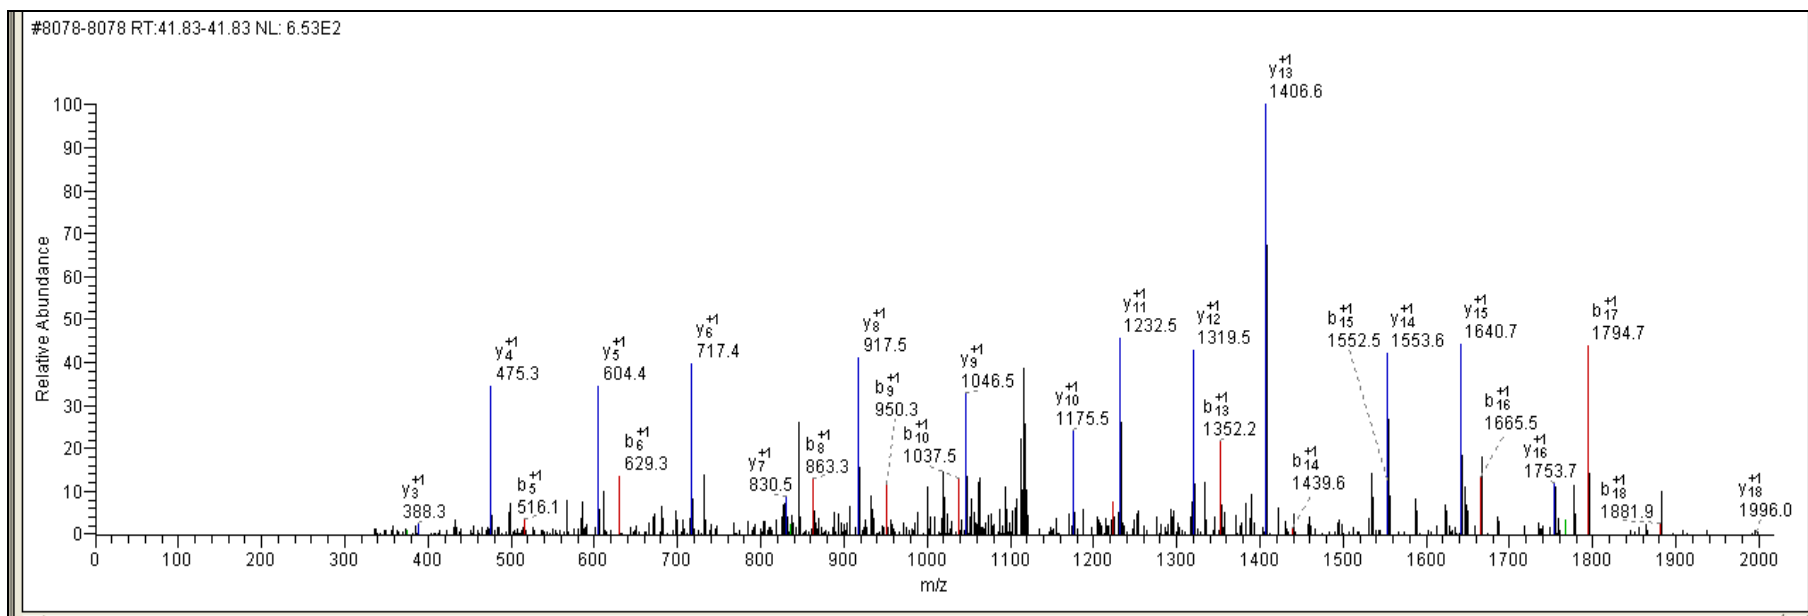

# CG8793 NP\_649135.2 CG8793 CG8793-PA

## K.IEEMLVITAANNK.P

|    | AA | A       | B       | Y       |    |
|----|----|---------|---------|---------|----|
| 1  | I  | 86.10   | 114.09  | -       | 13 |
| 2  | E  | 215.14  | 243.13  | 1348.68 | 12 |
| 3  | E  | 344.18  | 372.18  | 1219.64 | 11 |
| 4  | M* | 491.22  | 519.21  | 1090.59 | 10 |
| 5  | L  | 604.30  | 632.30  | 943.56  | 9  |
| 6  | V  | 703.37  | 731.36  | 830.47  | 8  |
| 7  | I  | 816.45  | 844.45  | 731.40  | 7  |
| 8  | T  | 917.50  | 945.50  | 618.32  | 6  |
| 9  | A  | 988.54  | 1016.53 | 517.27  | 5  |
| 10 | A  | 1059.58 | 1087.57 | 446.24  | 4  |
| 11 | N  | 1173.62 | 1201.61 | 375.20  | 3  |
| 12 | N  | 1287.66 | 1315.66 | 261.16  | 2  |
| 13 | K  | -       | -       | 147.11  | 1  |

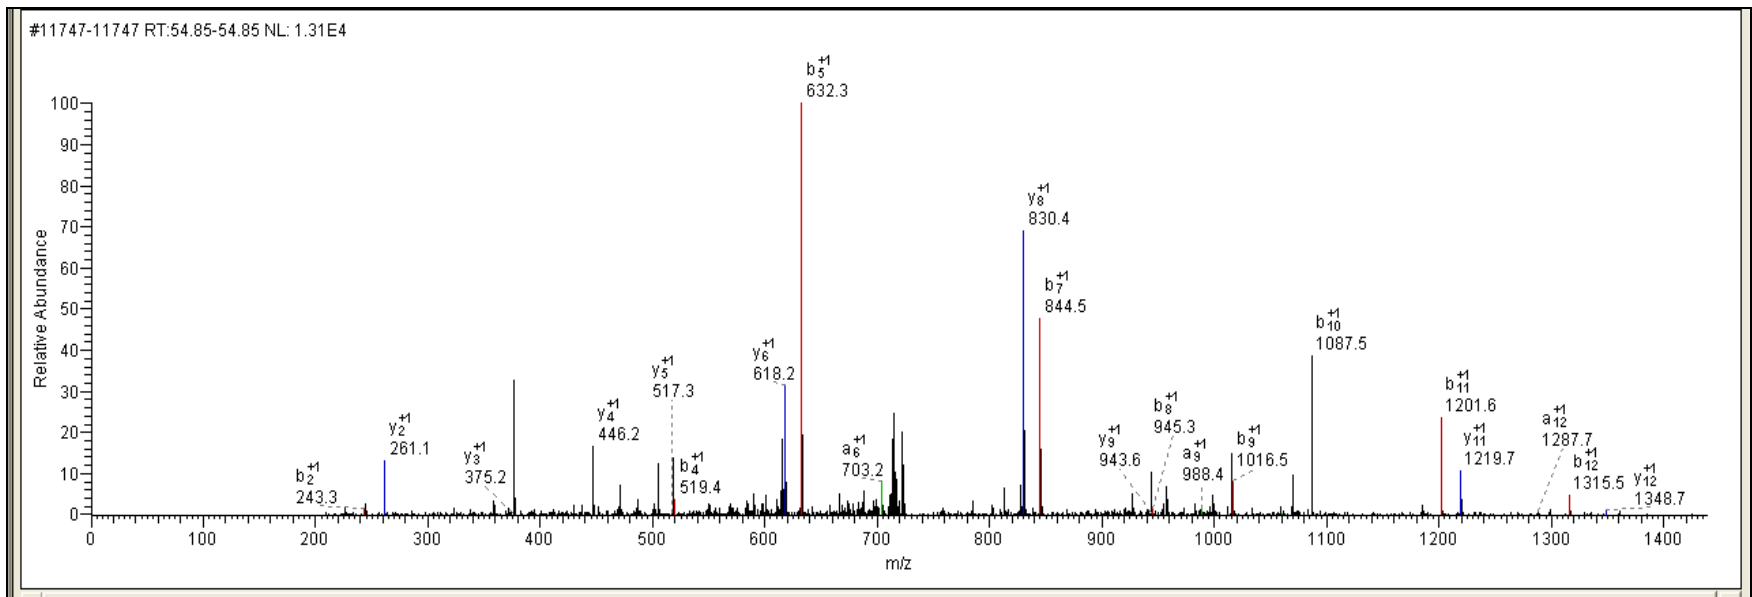

# Droj2 NP\_650283.1 CG8863 CG8863-PA

## K.AISQAYEVLSDADKR.Q

|    | AA | A       | B       | Y       |    |
|----|----|---------|---------|---------|----|
| 1  | A  | 44.05   | 72.04   | -       | 15 |
| 2  | I  | 157.13  | 185.13  | 1594.81 | 14 |
| 3  | S  | 244.17  | 272.16  | 1481.72 | 13 |
| 4  | Q  | 372.22  | 400.22  | 1394.69 | 12 |
| 5  | A  | 443.26  | 471.26  | 1266.63 | 11 |
| 6  | Y  | 606.32  | 634.32  | 1195.60 | 10 |
| 7  | E  | 735.37  | 763.36  | 1032.53 | 9  |
| 8  | V  | 834.44  | 862.43  | 903.49  | 8  |
| 9  | L  | 947.52  | 975.51  | 804.42  | 7  |
| 10 | S  | 1034.55 | 1062.55 | 691.34  | 6  |
| 11 | D  | 1149.58 | 1177.57 | 604.30  | 5  |
| 12 | A  | 1220.62 | 1248.61 | 489.28  | 4  |
| 13 | D  | 1335.64 | 1363.64 | 418.24  | 3  |
| 14 | K  | 1463.74 | 1491.73 | 303.21  | 2  |
| 15 | R  | -       | -       | 175.12  | 1  |

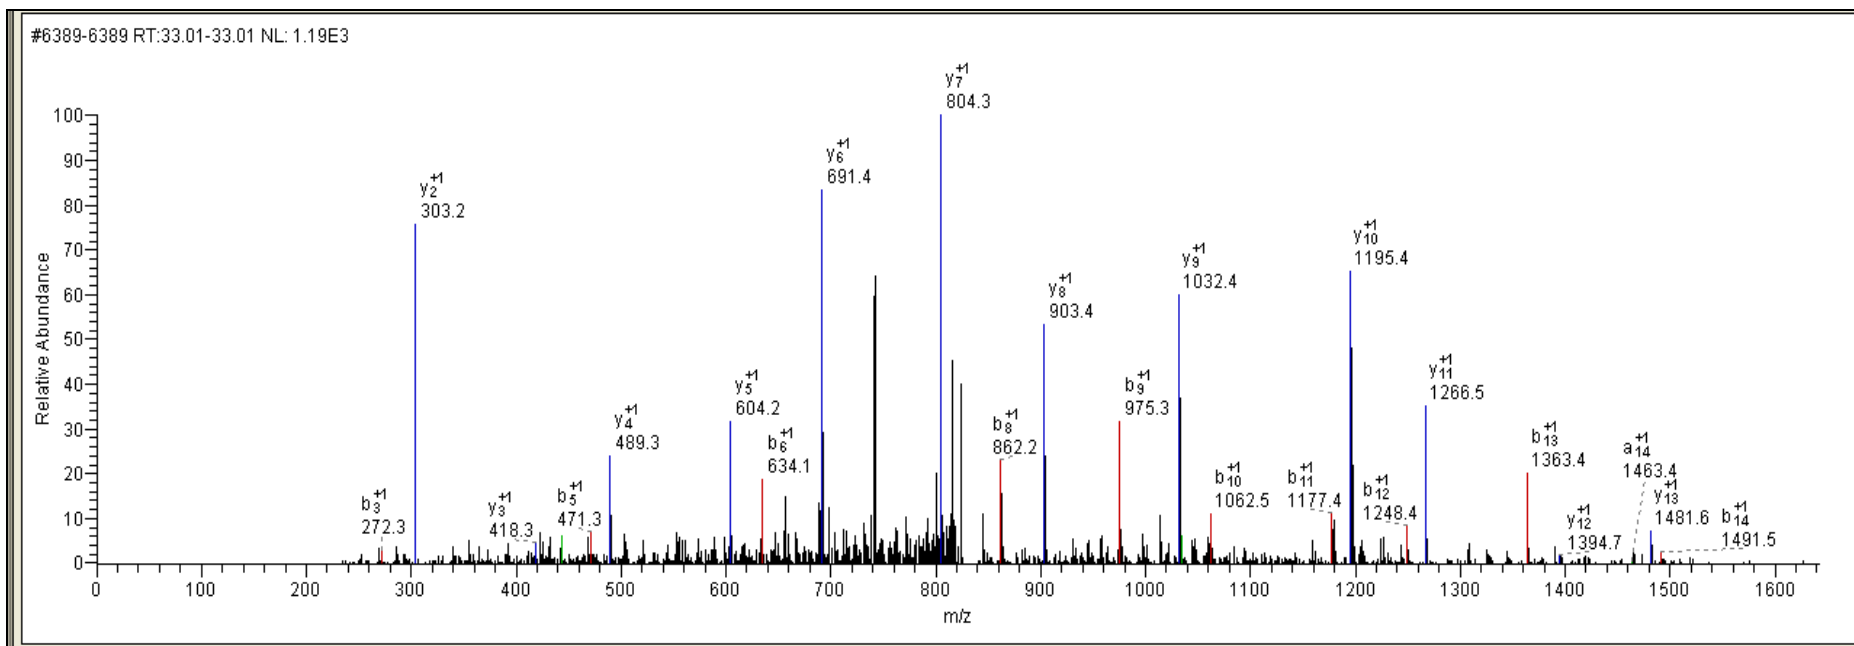

# CG9143 NP\_611467.1 CG9143 CG9143-PA

## K.IVDITSSQQTALTESR.L

|    | AA | A       | B       | Y       |    |
|----|----|---------|---------|---------|----|
| 1  | I  | 86.10   | 114.09  | -       | 18 |
| 2  | V  | 185.16  | 213.16  | 1864.92 | 17 |
| 3  | D  | 300.19  | 328.19  | 1765.86 | 16 |
| 4  | I  | 413.28  | 441.27  | 1650.83 | 15 |
| 5  | T  | 514.32  | 542.32  | 1537.75 | 14 |
| 6  | S  | 601.36  | 629.35  | 1436.70 | 13 |
| 7  | S  | 688.39  | 716.38  | 1349.67 | 12 |
| 8  | Q  | 816.45  | 844.44  | 1262.63 | 11 |
| 9  | Q  | 944.50  | 972.50  | 1134.57 | 10 |
| 10 | T  | 1045.55 | 1073.55 | 1006.52 | 9  |
| 11 | A  | 1116.59 | 1144.58 | 905.47  | 8  |
| 12 | Q  | 1244.65 | 1272.64 | 834.43  | 7  |
| 13 | T  | 1345.70 | 1373.69 | 706.37  | 6  |
| 14 | L  | 1458.78 | 1486.77 | 605.33  | 5  |
| 15 | T  | 1559.83 | 1587.82 | 492.24  | 4  |
| 16 | E  | 1688.87 | 1716.87 | 391.19  | 3  |
| 17 | S  | 1775.90 | 1803.90 | 262.15  | 2  |
| 18 | R  | -       | -       | 175.12  | 1  |

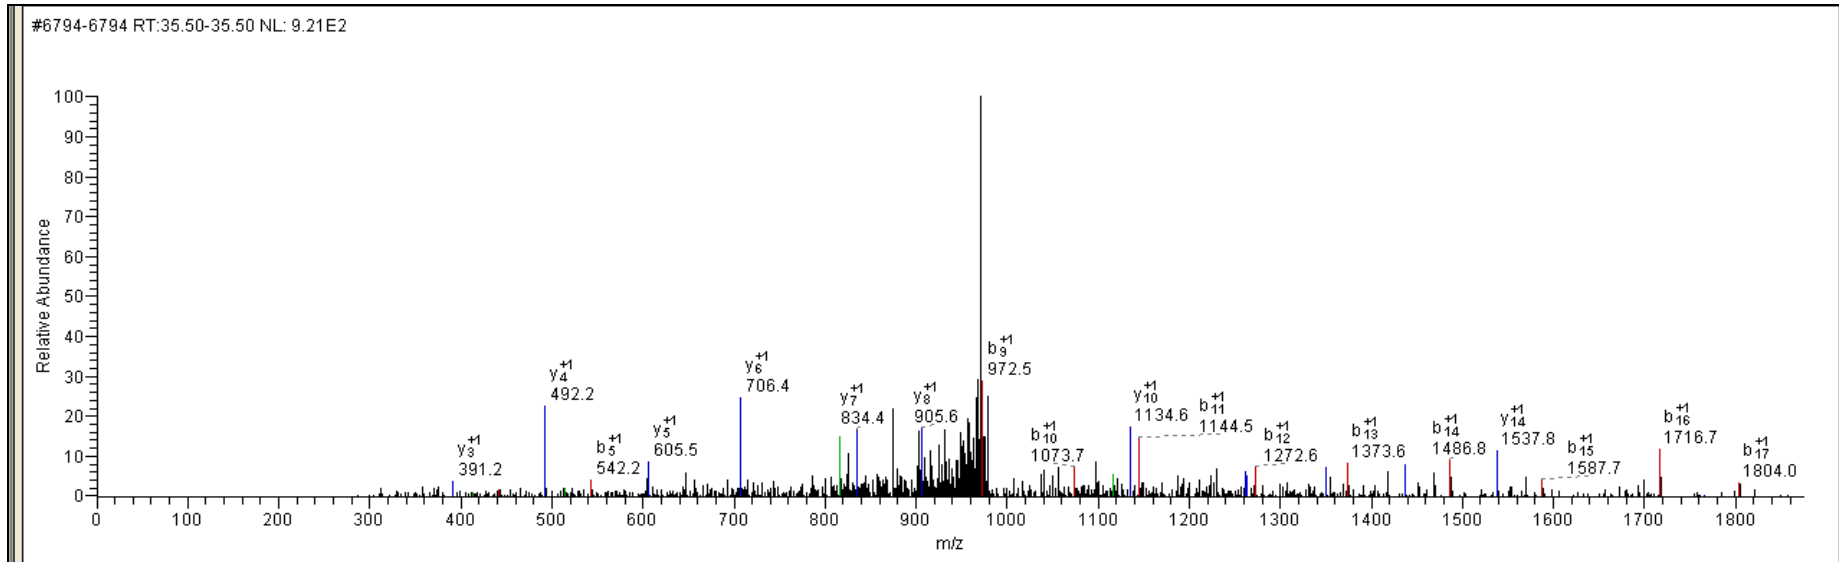

# CG9253 NP\_610090.1 CG9253 CG9253-PA

R.EAIPVALQGKDVIGLAETGSGK.T

|    | AA | A       | B       | Y       |    |
|----|----|---------|---------|---------|----|
| 1  | E  | 102.05  | 130.05  | -       | 22 |
| 2  | A  | 173.09  | 201.09  | 2024.14 | 21 |
| 3  | I  | 286.18  | 314.17  | 1953.10 | 20 |
| 4  | P  | 363.23  | 411.22  | 1840.02 | 19 |
| 5  | V  | 482.30  | 510.29  | 1742.96 | 18 |
| 6  | A  | 553.33  | 581.33  | 1643.90 | 17 |
| 7  | L  | 666.42  | 694.41  | 1572.86 | 16 |
| 8  | Q  | 794.48  | 822.47  | 1459.78 | 15 |
| 9  | G  | 851.50  | 879.49  | 1331.72 | 14 |
| 10 | K  | 979.59  | 1007.59 | 1274.70 | 13 |
| 11 | D  | 1094.62 | 1122.62 | 1146.60 | 12 |
| 12 | V  | 1193.69 | 1221.68 | 1031.57 | 11 |
| 13 | I  | 1306.77 | 1334.77 | 932.50  | 10 |
| 14 | G  | 1363.79 | 1391.79 | 819.42  | 9  |
| 15 | L  | 1476.88 | 1504.87 | 762.40  | 8  |
| 16 | A  | 1547.92 | 1575.91 | 649.32  | 7  |
| 17 | E  | 1676.96 | 1704.95 | 578.28  | 6  |
| 18 | T  | 1778.01 | 1806.00 | 449.24  | 5  |
| 19 | G  | 1835.03 | 1863.02 | 348.19  | 4  |
| 20 | S  | 1922.06 | 1950.05 | 291.17  | 3  |
| 21 | G  | 1979.08 | 2007.08 | 204.13  | 2  |
| 22 | K  | -       | -       | 147.11  | 1  |

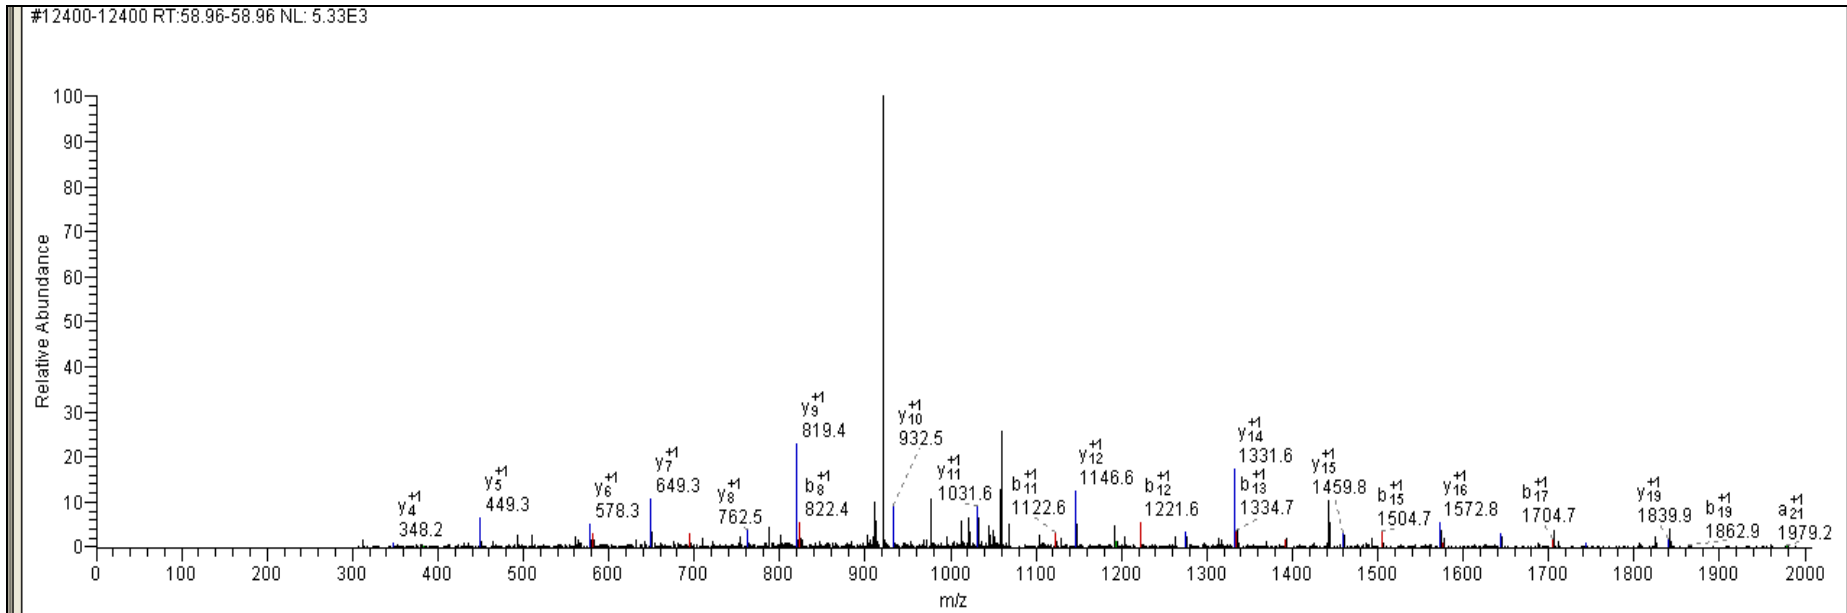

# NP\_731797.1 CG9813 CG9813-PF

## R.ESALKFLQDIR.L

|    | AA | A       | B       | Y       |    |
|----|----|---------|---------|---------|----|
| 1  | E  | 102.05  | 130.05  | -       | 11 |
| 2  | S  | 189.09  | 217.08  | 1190.69 | 10 |
| 3  | A  | 260.12  | 288.12  | 1103.66 | 9  |
| 4  | L  | 373.21  | 401.20  | 1032.62 | 8  |
| 5  | K  | 501.30  | 529.30  | 919.54  | 7  |
| 6  | F  | 648.37  | 676.37  | 791.44  | 6  |
| 7  | L  | 761.46  | 789.45  | 644.37  | 5  |
| 8  | Q  | 889.51  | 917.51  | 531.29  | 4  |
| 9  | D  | 1004.54 | 1032.54 | 403.23  | 3  |
| 10 | I  | 1117.63 | 1145.62 | 288.20  | 2  |
| 11 | R  | -       | -       | 175.12  | 1  |

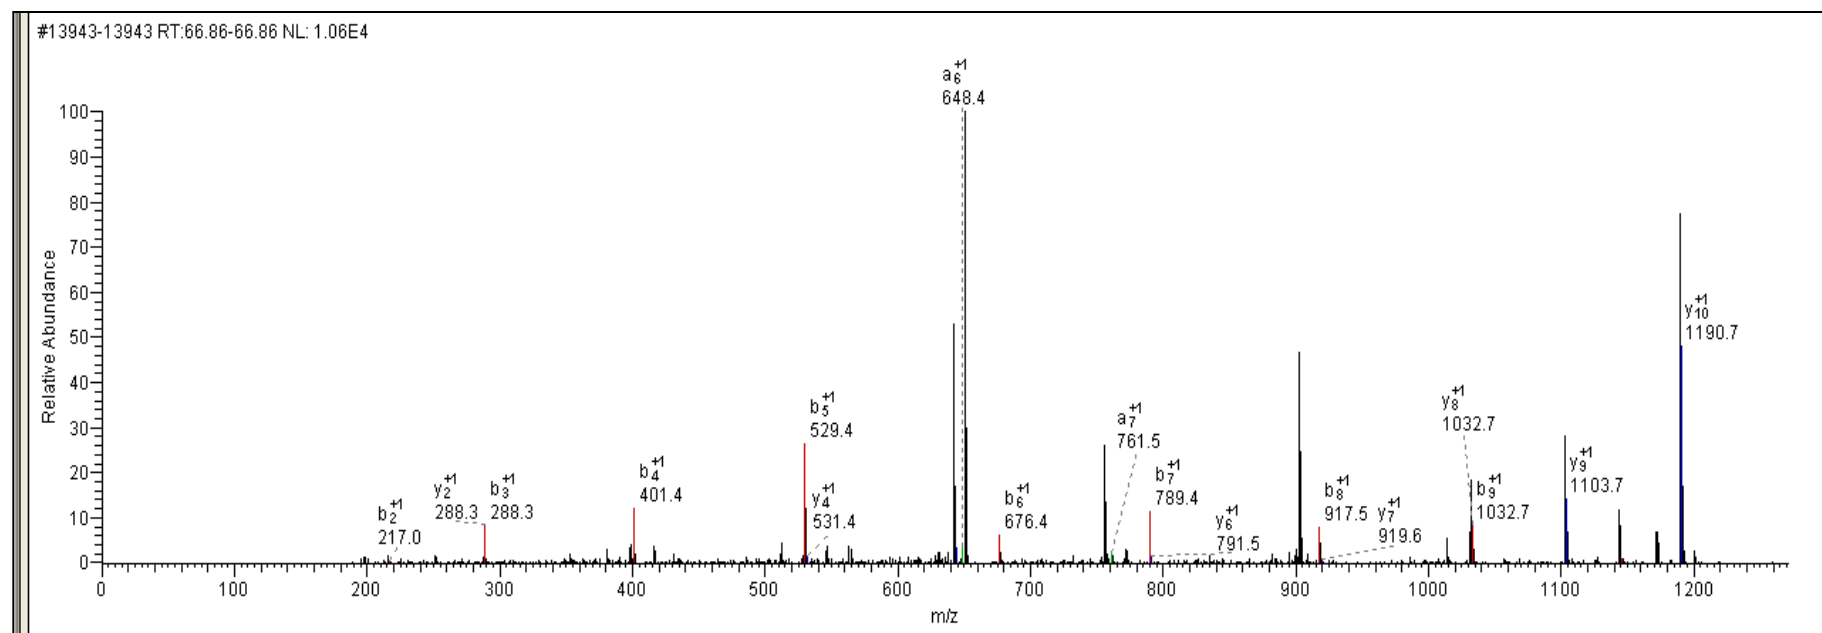

# chic NP\_477016.1 chickadee CG9553-PA

## K.LISGFDQQDGLTSNGVTLAQR.Y

|    | AA | A       | B       | Y       |    |
|----|----|---------|---------|---------|----|
| 1  | L  | 86.10   | 114.09  | -       | 22 |
| 2  | I  | 199.18  | 227.18  | 2164.06 | 21 |
| 3  | S  | 286.21  | 314.21  | 2050.98 | 20 |
| 4  | G  | 343.23  | 371.23  | 1963.95 | 19 |
| 5  | F  | 490.30  | 518.30  | 1906.93 | 18 |
| 6  | D  | 605.33  | 633.32  | 1759.86 | 17 |
| 7  | Q  | 733.39  | 761.38  | 1644.83 | 16 |
| 8  | Q  | 861.45  | 889.44  | 1516.77 | 15 |
| 9  | D  | 976.47  | 1004.47 | 1388.71 | 14 |
| 10 | G  | 1033.49 | 1061.49 | 1273.69 | 13 |
| 11 | L  | 1146.58 | 1174.57 | 1216.66 | 12 |
| 12 | T  | 1247.63 | 1275.62 | 1103.58 | 11 |
| 13 | S  | 1334.66 | 1362.65 | 1002.53 | 10 |
| 14 | N  | 1448.70 | 1476.70 | 915.50  | 9  |
| 15 | G  | 1505.72 | 1533.72 | 801.46  | 8  |
| 16 | V  | 1604.79 | 1632.79 | 744.44  | 7  |
| 17 | T  | 1705.84 | 1733.83 | 645.37  | 6  |
| 18 | L  | 1818.92 | 1846.92 | 544.32  | 5  |
| 19 | A  | 1889.96 | 1917.96 | 431.24  | 4  |
| 20 | G  | 1946.98 | 1974.98 | 360.20  | 3  |
| 21 | Q  | 2075.04 | 2103.04 | 303.18  | 2  |
| 22 | R  | -       | -       | 175.12  | 1  |

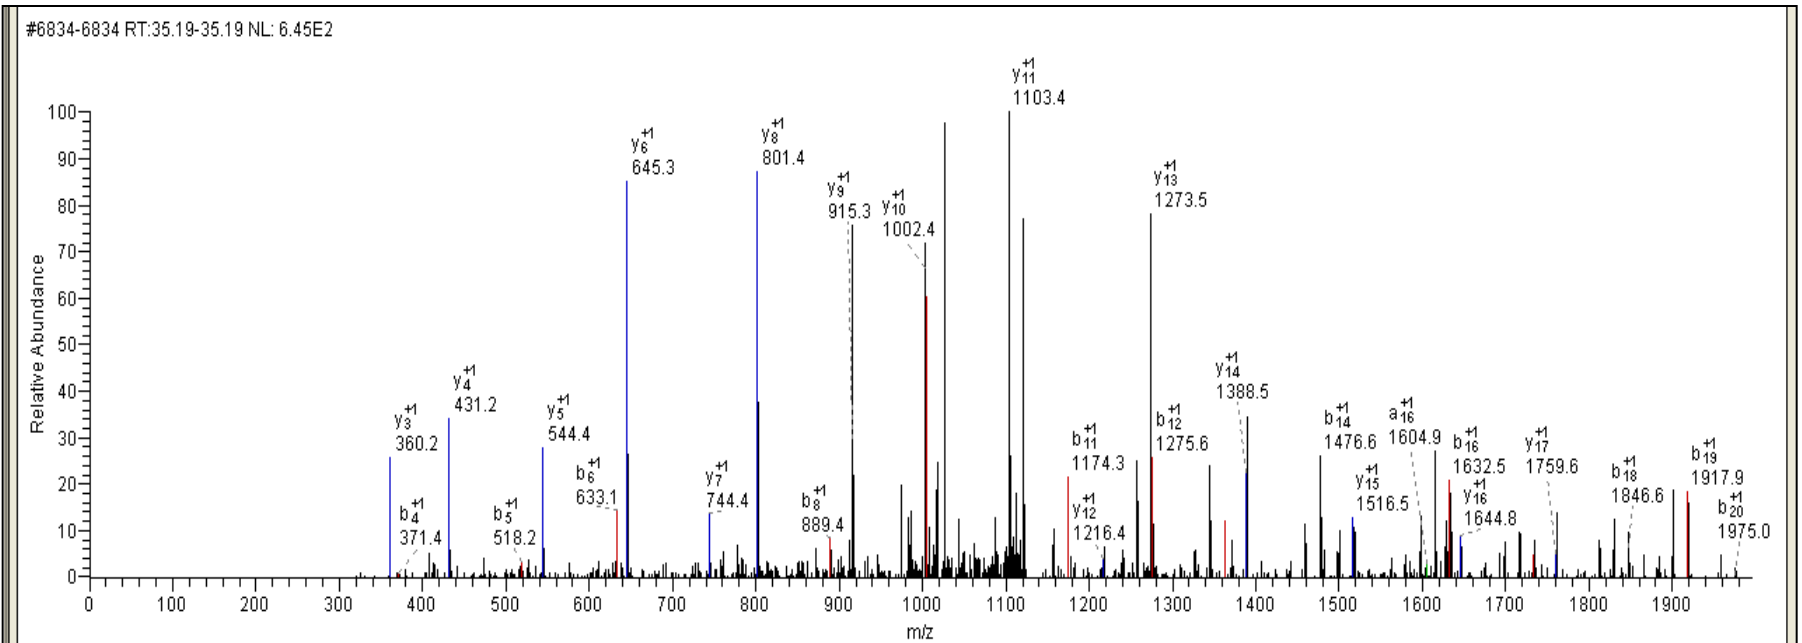



# Chro NP\_730762.2 Chromator CG10712-PB

## R.RPGVGGASHVR.Q

|    | AA | A      | B      | Y      |    |
|----|----|--------|--------|--------|----|
| 1  | R  | 129.11 | 157.11 | -      | 11 |
| 2  | P  | 226.17 | 254.16 | 936.50 | 10 |
| 3  | G  | 283.19 | 311.18 | 839.45 | 9  |
| 4  | V  | 382.26 | 410.25 | 782.43 | 8  |
| 5  | G  | 439.28 | 467.27 | 683.36 | 7  |
| 6  | G  | 496.30 | 524.29 | 626.34 | 6  |
| 7  | A  | 567.34 | 595.33 | 569.32 | 5  |
| 8  | S  | 654.37 | 682.36 | 498.28 | 4  |
| 9  | H  | 791.43 | 819.42 | 411.25 | 3  |
| 10 | V  | 890.50 | 918.49 | 274.19 | 2  |
| 11 | R  | -      | -      | 175.12 | 1  |

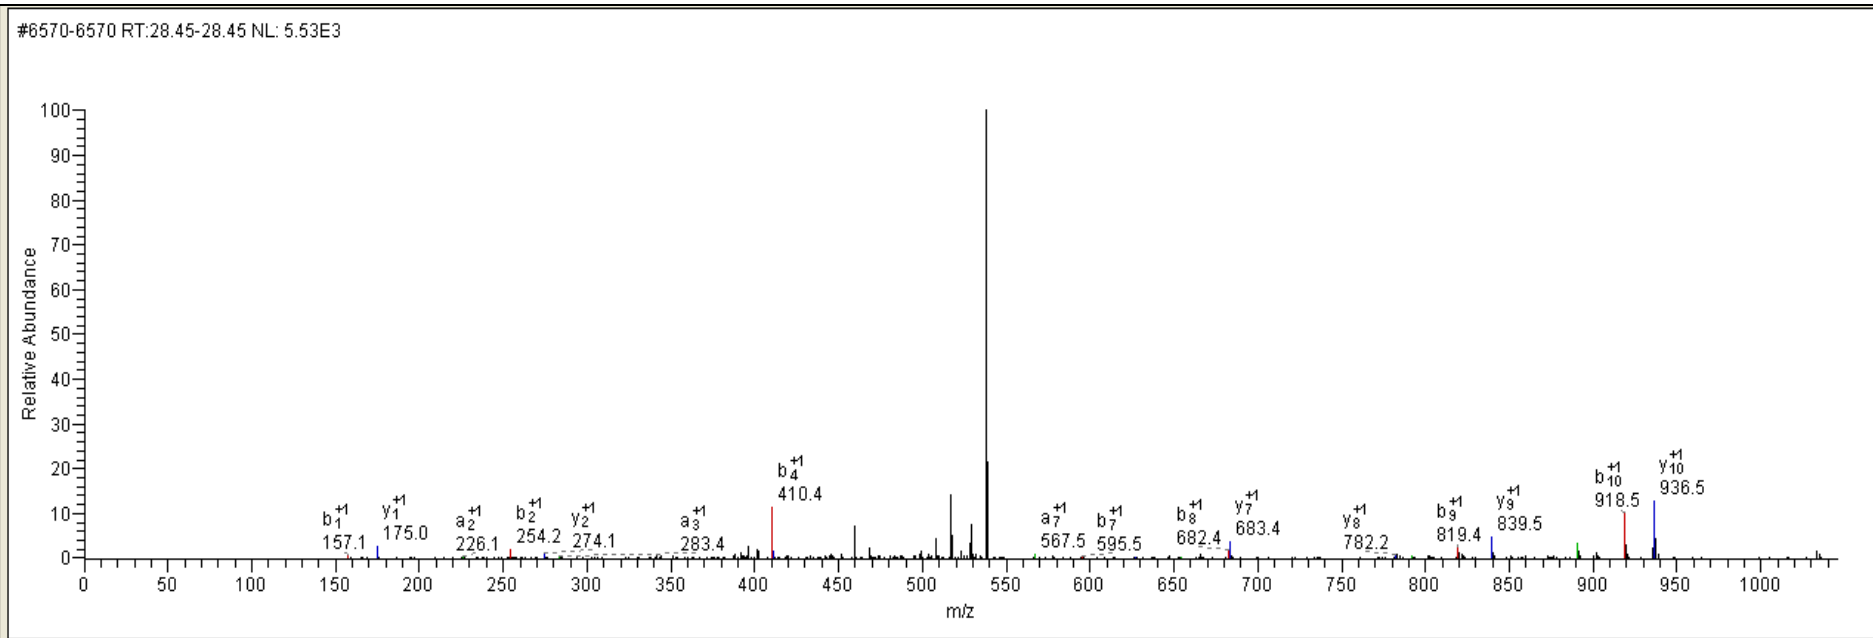

# Cap NP\_523374.2 Chromosome-associated protein CG9802-PA

R.NEVVNLLSAGFSSSNPYYIVK.Q

|    | AA | A       | B       | Y       |    |
|----|----|---------|---------|---------|----|
| 1  | N  | 87.06   | 115.05  | -       | 22 |
| 2  | E  | 216.10  | 244.09  | 2316.18 | 21 |
| 3  | V  | 315.17  | 343.16  | 2187.13 | 20 |
| 4  | V  | 414.23  | 442.23  | 2088.06 | 19 |
| 5  | N  | 528.28  | 556.27  | 1989.00 | 18 |
| 6  | L  | 641.36  | 669.36  | 1874.95 | 17 |
| 7  | L  | 754.45  | 782.44  | 1761.87 | 16 |
| 8  | E  | 883.49  | 911.48  | 1648.79 | 15 |
| 9  | S  | 970.52  | 998.52  | 1519.74 | 14 |
| 10 | A  | 1041.56 | 1069.55 | 1432.71 | 13 |
| 11 | G  | 1098.58 | 1126.57 | 1361.67 | 12 |
| 12 | F  | 1245.65 | 1273.64 | 1304.65 | 11 |
| 13 | S  | 1332.68 | 1360.67 | 1157.58 | 10 |
| 14 | S  | 1419.71 | 1447.71 | 1070.55 | 9  |
| 15 | S  | 1506.74 | 1534.74 | 983.52  | 8  |
| 16 | N  | 1620.79 | 1648.78 | 896.49  | 7  |
| 17 | P  | 1717.84 | 1745.83 | 782.44  | 6  |
| 18 | Y  | 1880.90 | 1908.90 | 685.39  | 5  |
| 19 | Y  | 2043.97 | 2071.96 | 522.33  | 4  |
| 20 | I  | 2157.05 | 2185.04 | 359.27  | 3  |
| 21 | V  | 2256.12 | 2284.11 | 246.18  | 2  |
| 22 | K  | -       | -       | 147.11  | 1  |

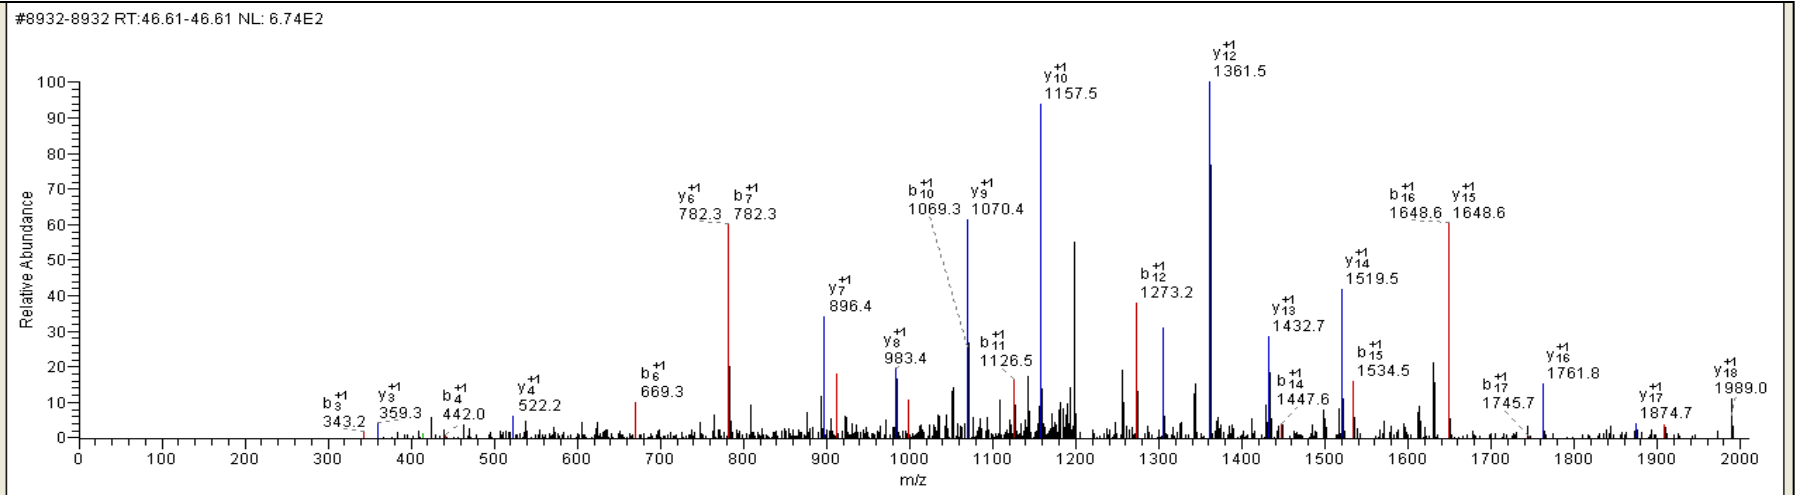

# NP\_723504.1 Cuticular protein 30F CG31876-PA

## R.TVDYTSDAHNGFNAVVR.R

|    | AA | A       | B       | Y       |    |
|----|----|---------|---------|---------|----|
| 1  | T  | 74.06   | 102.05  | -       | 17 |
| 2  | V  | 173.13  | 201.12  | 1764.83 | 16 |
| 3  | D  | 288.16  | 316.15  | 1665.76 | 15 |
| 4  | Y  | 451.22  | 479.21  | 1550.73 | 14 |
| 5  | T  | 552.27  | 580.26  | 1387.67 | 13 |
| 6  | S  | 639.30  | 667.29  | 1286.62 | 12 |
| 7  | D  | 754.33  | 782.32  | 1199.59 | 11 |
| 8  | A  | 825.36  | 853.36  | 1084.56 | 10 |
| 9  | H  | 962.42  | 990.42  | 1013.53 | 9  |
| 10 | N  | 1076.46 | 1104.46 | 876.47  | 8  |
| 11 | G  | 1133.49 | 1161.48 | 762.43  | 7  |
| 12 | F  | 1280.55 | 1308.55 | 705.40  | 6  |
| 13 | N  | 1394.60 | 1422.59 | 558.34  | 5  |
| 14 | A  | 1465.63 | 1493.63 | 444.29  | 4  |
| 15 | V  | 1564.70 | 1592.70 | 373.26  | 3  |
| 16 | V  | 1663.77 | 1691.77 | 274.19  | 2  |
| 17 | R  | -       | -       | 175.12  | 1  |

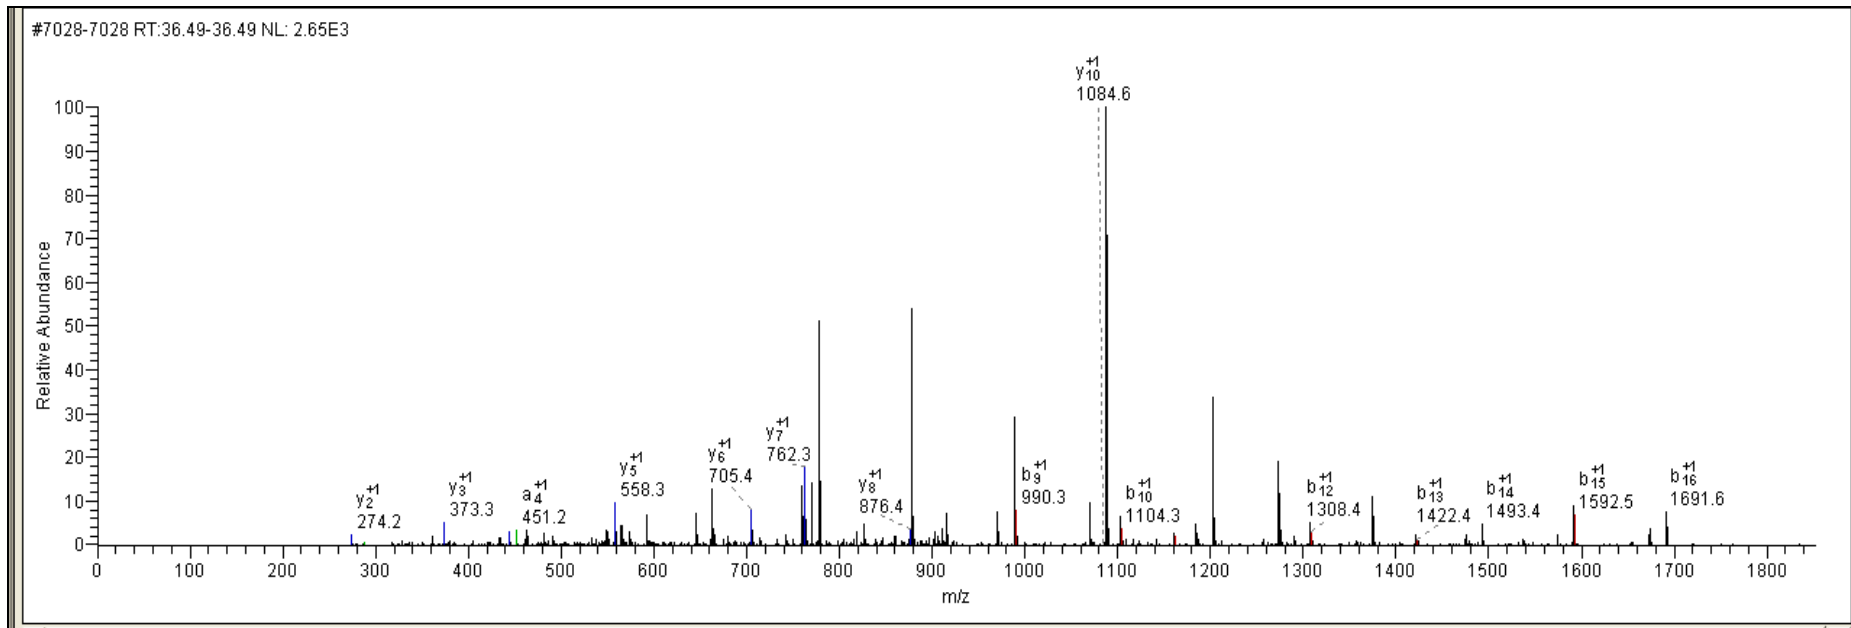

# Cpr64Ab NP\_647873.2 Cuticular protein 64Ab CG15007-PA

R.DGDVVKGSYSVVDADGSLR.T

|    | AA | A       | B       | Y       |    |
|----|----|---------|---------|---------|----|
| 1  | D  | 88.04   | 116.03  | -       | 19 |
| 2  | G  | 145.06  | 173.06  | 1823.91 | 18 |
| 3  | D  | 260.09  | 288.08  | 1766.89 | 17 |
| 4  | V  | 359.16  | 387.15  | 1651.86 | 16 |
| 5  | V  | 458.22  | 486.22  | 1552.80 | 15 |
| 6  | K  | 586.32  | 614.31  | 1453.73 | 14 |
| 7  | G  | 643.34  | 671.34  | 1325.63 | 13 |
| 8  | S  | 730.37  | 758.37  | 1268.61 | 12 |
| 9  | Y  | 893.44  | 921.43  | 1181.58 | 11 |
| 10 | S  | 980.47  | 1008.46 | 1018.52 | 10 |
| 11 | V  | 1079.54 | 1107.53 | 931.48  | 9  |
| 12 | V  | 1178.61 | 1206.60 | 832.42  | 8  |
| 13 | D  | 1293.63 | 1321.63 | 733.35  | 7  |
| 14 | A  | 1364.67 | 1392.66 | 618.32  | 6  |
| 15 | D  | 1479.70 | 1507.69 | 547.28  | 5  |
| 16 | G  | 1536.72 | 1564.71 | 432.26  | 4  |
| 17 | S  | 1623.75 | 1651.74 | 375.24  | 3  |
| 18 | L  | 1736.83 | 1764.83 | 288.20  | 2  |
| 19 | R  | -       | -       | 175.12  | 1  |

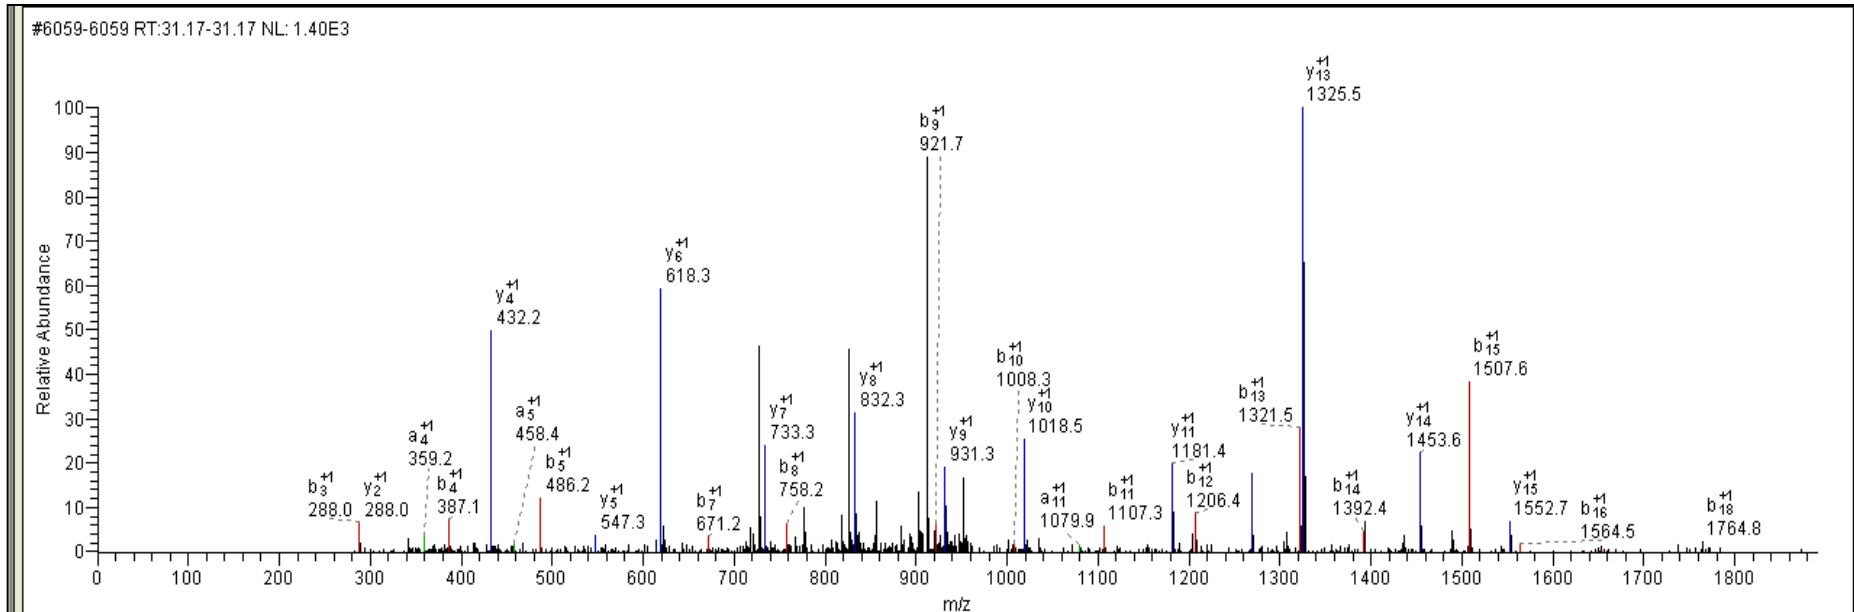

# dco NP\_733414.1 discs overgrown CG2048-PA

## R.YASINTHLGIEQSR.R

|    | AA | A       | B       | Y       |    |
|----|----|---------|---------|---------|----|
| 1  | Y  | 136.08  | 164.07  | -       | 14 |
| 2  | A  | 207.11  | 235.11  | 1425.74 | 13 |
| 3  | S  | 294.14  | 322.14  | 1354.71 | 12 |
| 4  | I  | 407.23  | 435.22  | 1267.68 | 11 |
| 5  | N  | 521.27  | 549.27  | 1154.59 | 10 |
| 6  | T  | 622.32  | 650.31  | 1040.55 | 9  |
| 7  | H  | 759.38  | 787.37  | 939.50  | 8  |
| 8  | L  | 872.46  | 900.46  | 802.44  | 7  |
| 9  | G  | 929.48  | 957.48  | 689.36  | 6  |
| 10 | I  | 1042.57 | 1070.56 | 632.34  | 5  |
| 11 | E  | 1171.61 | 1199.61 | 519.25  | 4  |
| 12 | Q  | 1299.67 | 1327.66 | 390.21  | 3  |
| 13 | S  | 1386.70 | 1414.70 | 262.15  | 2  |
| 14 | R  | -       | -       | 175.12  | 1  |

#5807-5807 RT:29.93-29.93 NL: 5.96E2

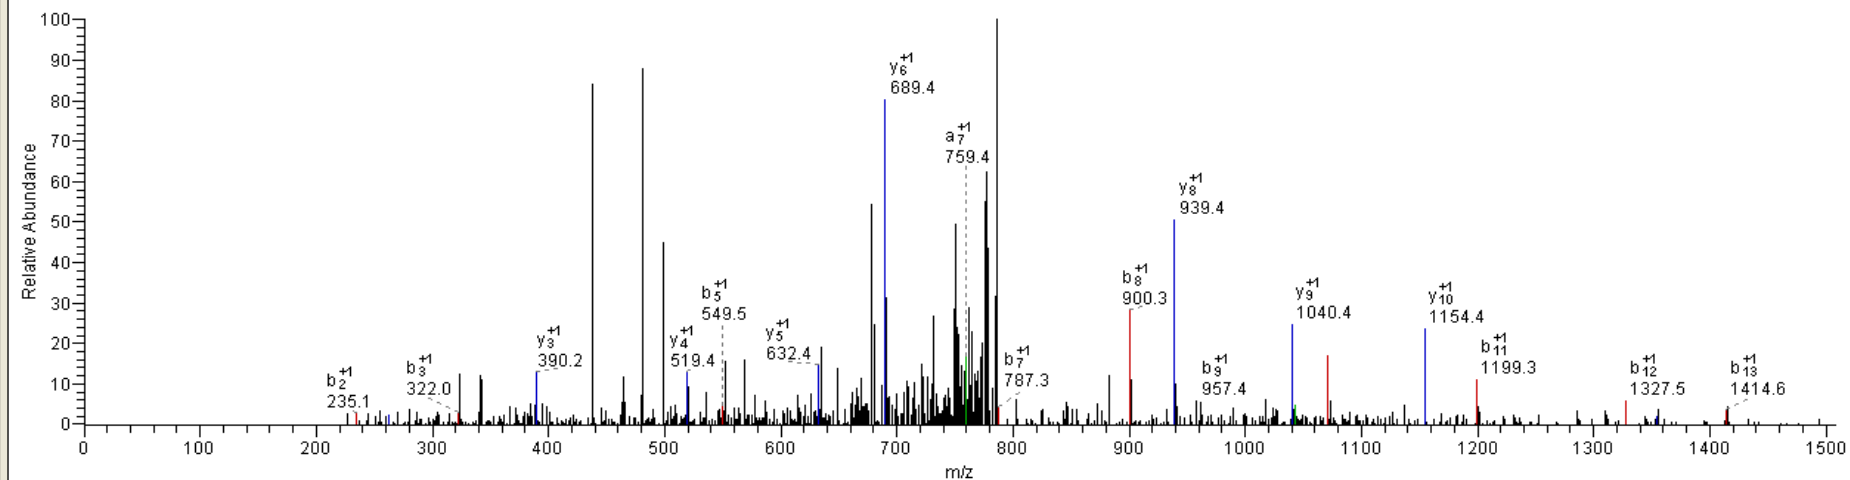

# DNApol-delta NP\_524099.2 DNA-polymerase-delta CG5949-PA

## R.EVDPDILTGYNINNFDLFPYLLNR.A

| S no | AA | A       | B       | Y       |    |
|------|----|---------|---------|---------|----|
| 1    | E  | 102.05  | 130.05  | -       | 23 |
| 2    | V  | 201.12  | 229.12  | 2613.3  | 22 |
| 3    | D  | 316.15  | 344.15  | 2514.23 | 21 |
| 4    | P  | 413.2   | 441.2   | 2399.2  | 20 |
| 5    | D  | 528.23  | 556.22  | 2302.15 | 19 |
| 6    | I  | 641.31  | 669.31  | 2187.12 | 18 |
| 7    | L  | 754.4   | 782.39  | 2074.04 | 17 |
| 8    | T  | 855.45  | 883.44  | 1960.96 | 16 |
| 9    | G  | 912.47  | 940.46  | 1859.91 | 15 |
| 10   | Y  | 1075.53 | 1103.53 | 1802.89 | 14 |
| 11   | N  | 1189.57 | 1217.57 | 1639.82 | 13 |
| 12   | I  | 1302.66 | 1330.65 | 1525.78 | 12 |
| 13   | N  | 1416.7  | 1444.7  | 1412.7  | 11 |
| 14   | N  | 1530.74 | 1558.74 | 1298.65 | 10 |
| 15   | F  | 1677.81 | 1705.81 | 1184.61 | 9  |
| 16   | D  | 1792.84 | 1820.83 | 1037.54 | 8  |
| 17   | F  | 1939.91 | 1967.9  | 922.51  | 7  |
| 18   | P  | 2036.96 | 2064.95 | 775.45  | 6  |
| 19   | Y  | 2200.02 | 2228.02 | 678.39  | 5  |
| 20   | L  | 2313.11 | 2341.1  | 515.33  | 4  |
| 21   | L  | 2426.19 | 2454.19 | 402.25  | 3  |
| 22   | N  | 2540.23 | 2568.23 | 289.16  | 2  |
| 23   | R  | -       | -       | 175.12  | 1  |

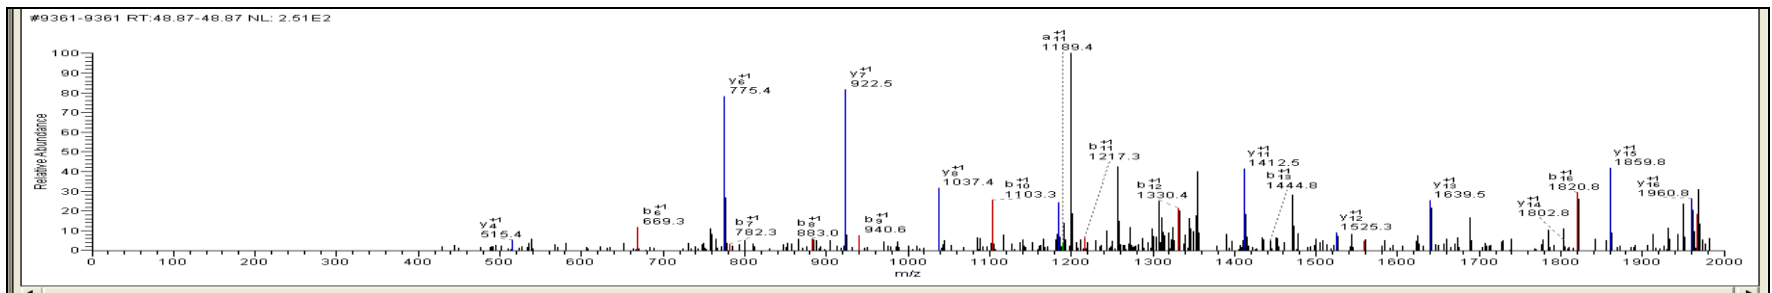

# Dsp1 NP\_996485.1 Dorsal switch protein 1 CG12223-PE

K.ALNPEFGVGDIAKELGR.K

|    | AA | A       | B       | Y       |    |
|----|----|---------|---------|---------|----|
| 1  | A  | 44.05   | 72.04   | -       | 17 |
| 2  | L  | 157.13  | 185.13  | 1714.91 | 16 |
| 3  | N  | 271.18  | 299.17  | 1601.83 | 15 |
| 4  | P  | 368.23  | 396.22  | 1487.79 | 14 |
| 5  | E  | 497.27  | 525.27  | 1390.73 | 13 |
| 6  | F  | 644.34  | 672.34  | 1261.69 | 12 |
| 7  | G  | 701.36  | 729.36  | 1114.62 | 11 |
| 8  | V  | 800.43  | 828.43  | 1057.60 | 10 |
| 9  | G  | 857.45  | 885.45  | 958.53  | 9  |
| 10 | D  | 972.48  | 1000.47 | 901.51  | 8  |
| 11 | I  | 1085.56 | 1113.56 | 786.48  | 7  |
| 12 | A  | 1156.60 | 1184.59 | 673.40  | 6  |
| 13 | K  | 1284.69 | 1312.69 | 602.36  | 5  |
| 14 | E  | 1413.74 | 1441.73 | 474.27  | 4  |
| 15 | L  | 1526.82 | 1554.82 | 345.22  | 3  |
| 16 | G  | 1583.84 | 1611.84 | 232.14  | 2  |
| 17 | R  | -       | -       | 175.12  | 1  |

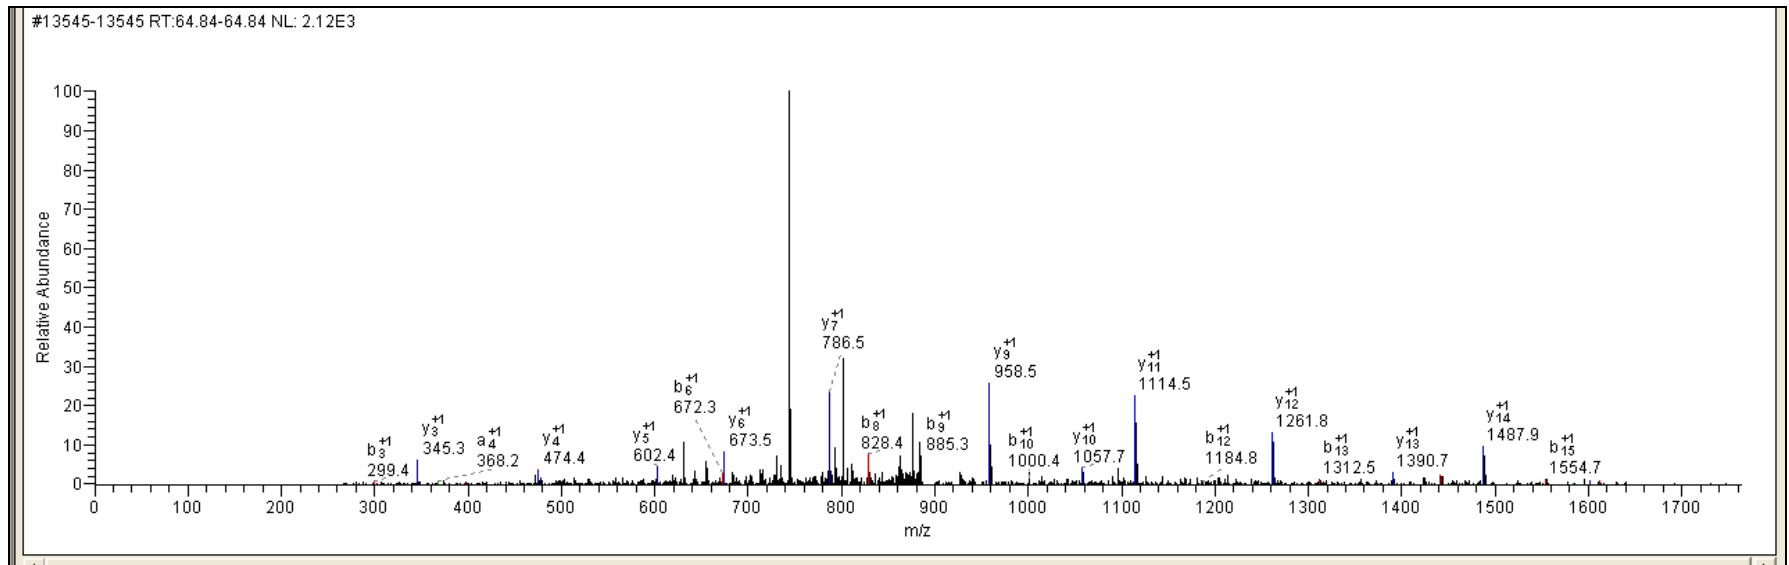

# Dsor1 NP\_511098.1 Downstream of raf1 CG15793-PA

## K.TSIDALTETLEGLDMGDTER.K

|    | AA | A       | B       | Y       |    |
|----|----|---------|---------|---------|----|
| 1  | T  | 74.06   | 102.05  | -       | 20 |
| 2  | S  | 161.09  | 189.09  | 2081.95 | 19 |
| 3  | I  | 274.18  | 302.17  | 1994.92 | 18 |
| 4  | D  | 389.20  | 417.20  | 1881.84 | 17 |
| 5  | A  | 460.24  | 488.24  | 1766.81 | 16 |
| 6  | L  | 573.32  | 601.32  | 1695.77 | 15 |
| 7  | T  | 674.37  | 702.37  | 1582.69 | 14 |
| 8  | E  | 803.41  | 831.41  | 1481.64 | 13 |
| 9  | T  | 904.46  | 932.46  | 1352.60 | 12 |
| 10 | L  | 1017.55 | 1045.54 | 1251.55 | 11 |
| 11 | E  | 1146.59 | 1174.58 | 1138.47 | 10 |
| 12 | G  | 1203.61 | 1231.61 | 1009.43 | 9  |
| 13 | L  | 1316.69 | 1344.69 | 952.40  | 8  |
| 14 | D  | 1431.72 | 1459.72 | 839.32  | 7  |
| 15 | M* | 1578.76 | 1606.75 | 724.29  | 6  |
| 16 | G  | 1635.78 | 1663.77 | 577.26  | 5  |
| 17 | D  | 1750.81 | 1778.80 | 520.24  | 4  |
| 18 | T  | 1851.85 | 1879.85 | 405.21  | 3  |
| 19 | E  | 1980.90 | 2008.89 | 304.16  | 2  |
| 20 | R  | -       | -       | 175.12  | 1  |

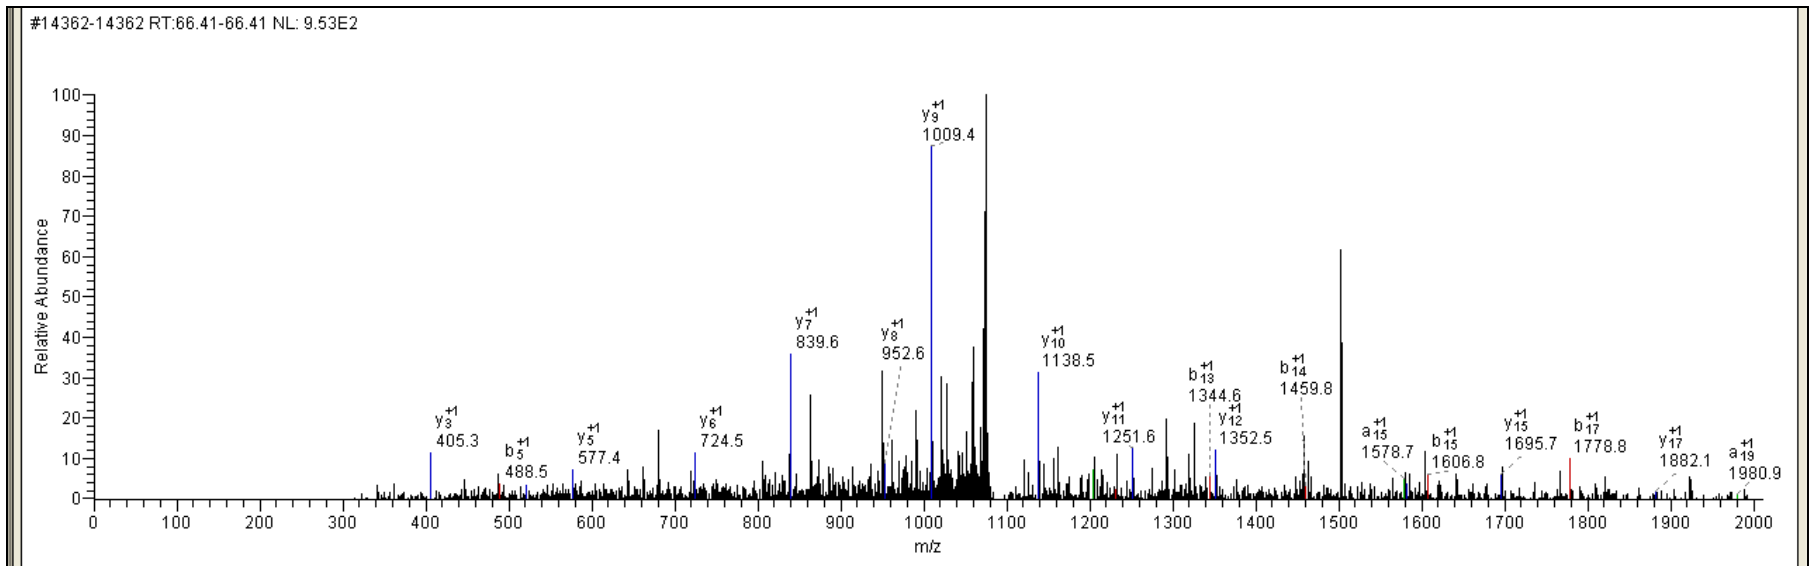



# dyl NP\_728979.1 dusky-like CG15013-PB

## R.NDFALGGPGVLPPAAYPDPR.H

|    | AA | A       | B       | Y       |    |
|----|----|---------|---------|---------|----|
| 1  | N  | 87.06   | 115.05  | -       | 20 |
| 2  | D  | 202.08  | 230.08  | 1909.98 | 19 |
| 3  | F  | 349.15  | 377.15  | 1794.95 | 18 |
| 4  | A  | 420.19  | 448.18  | 1647.89 | 17 |
| 5  | L  | 533.27  | 561.27  | 1576.85 | 16 |
| 6  | G  | 590.29  | 618.29  | 1463.76 | 15 |
| 7  | G  | 647.31  | 675.31  | 1406.74 | 14 |
| 8  | P  | 744.37  | 772.36  | 1349.72 | 13 |
| 9  | G  | 801.39  | 829.38  | 1252.67 | 12 |
| 10 | V  | 900.46  | 928.45  | 1195.65 | 11 |
| 11 | L  | 1013.54 | 1041.54 | 1096.58 | 10 |
| 12 | P  | 1110.59 | 1138.59 | 983.49  | 9  |
| 13 | P  | 1207.65 | 1235.64 | 886.44  | 8  |
| 14 | A  | 1278.68 | 1306.68 | 789.39  | 7  |
| 15 | A  | 1349.72 | 1377.72 | 718.35  | 6  |
| 16 | Y  | 1512.78 | 1540.78 | 647.31  | 5  |
| 17 | P  | 1609.84 | 1637.83 | 484.25  | 4  |
| 18 | D  | 1724.86 | 1752.86 | 387.20  | 3  |
| 19 | P  | 1821.92 | 1849.91 | 272.17  | 2  |
| 20 | R  | -       | -       | 175.12  | 1  |

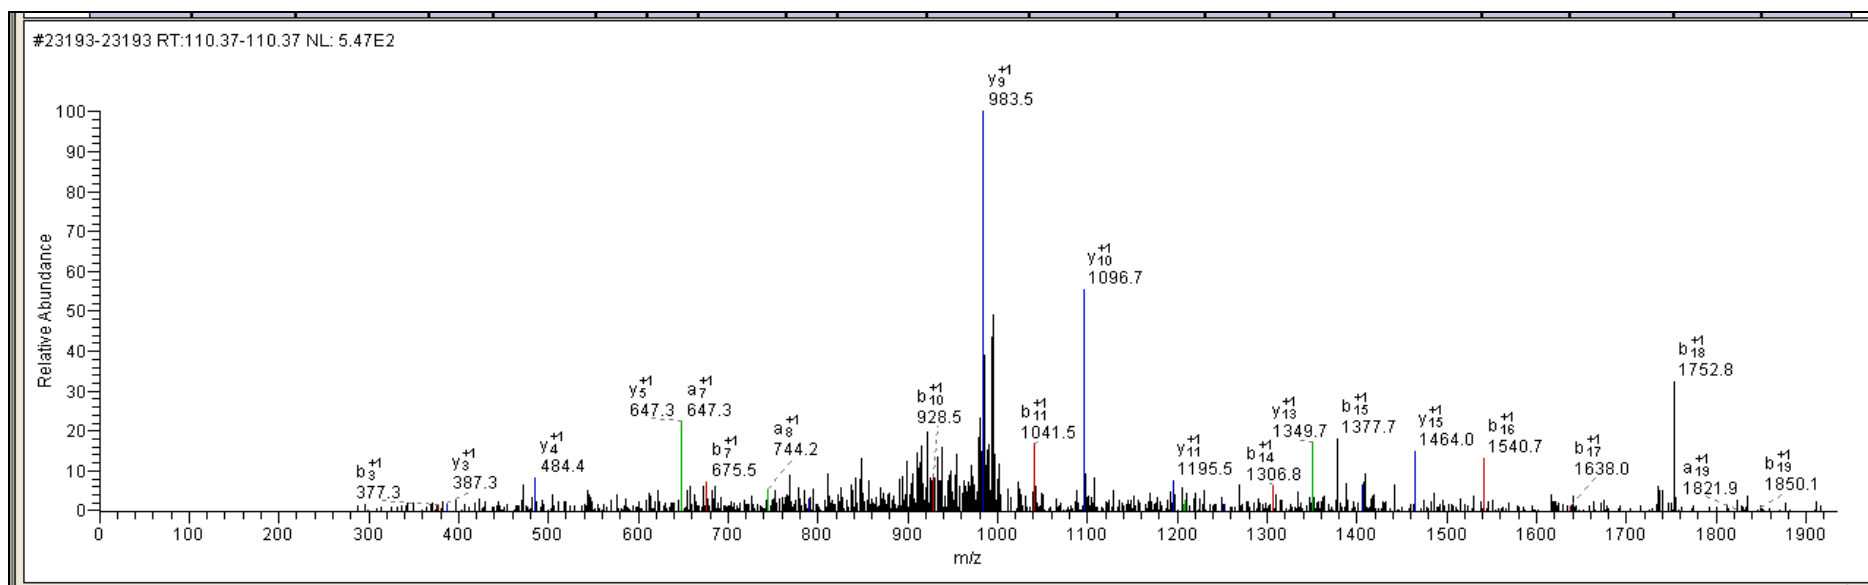

# eIF-2alpha NP\_573130.1 eIF-2alpha CG9946-PA

K.ALEVAIEHIR.A

|    | AA | A      | B      | Y       |    |
|----|----|--------|--------|---------|----|
| 1  | A  | 44.05  | 72.04  | -       | 10 |
| 2  | L  | 157.13 | 185.13 | 1079.62 | 9  |
| 3  | E  | 286.18 | 314.17 | 966.54  | 8  |
| 4  | V  | 385.24 | 413.24 | 837.49  | 7  |
| 5  | A  | 456.28 | 484.28 | 738.43  | 6  |
| 6  | I  | 569.37 | 597.36 | 667.39  | 5  |
| 7  | E  | 698.41 | 726.40 | 554.30  | 4  |
| 8  | H  | 835.47 | 863.46 | 425.26  | 3  |
| 9  | I  | 948.55 | 976.55 | 288.20  | 2  |
| 10 | R  | -      | -      | 175.12  | 1  |

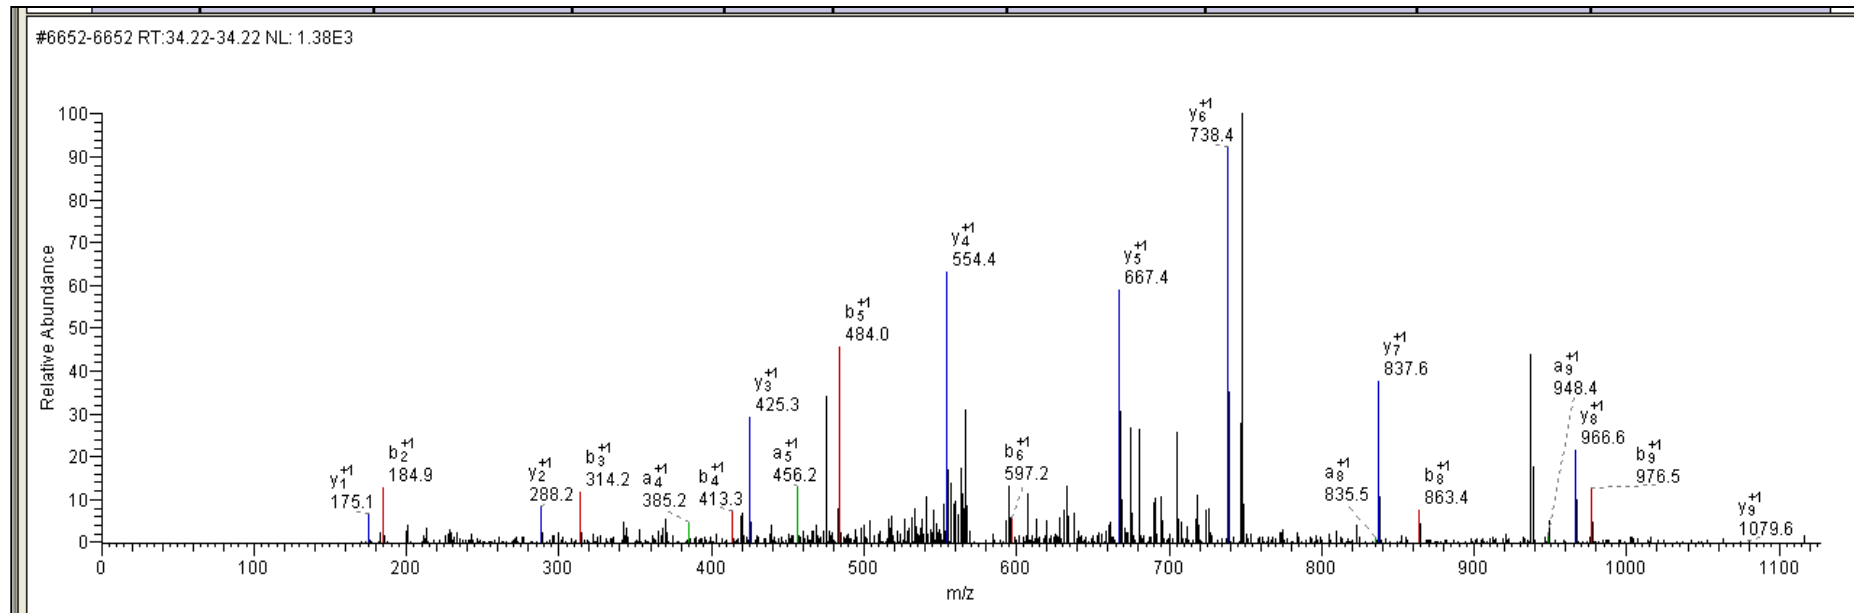

# EfTuM NP\_524752.1 Elongation factor Tu mitochondrial CG6050-PA

## K.STVTGVEMFHQILEEAQAGDQLGALVR.G

| S no | AA | A       | B       | Y       |    |
|------|----|---------|---------|---------|----|
| 1    | S  | 60.04   | 88.04   | -       | 27 |
| 2    | T  | 161.09  | 189.09  | 2812.43 | 26 |
| 3    | V  | 260.16  | 288.16  | 2711.38 | 25 |
| 4    | T  | 361.21  | 389.2   | 2612.31 | 24 |
| 5    | G  | 418.23  | 446.22  | 2511.27 | 23 |
| 6    | V  | 517.3   | 545.29  | 2454.24 | 22 |
| 7    | E  | 646.34  | 674.34  | 2355.18 | 21 |
| 8    | M  | 777.38  | 805.38  | 2226.13 | 20 |
| 9    | F  | 924.45  | 952.44  | 2095.09 | 19 |
| 10   | H  | 1061.51 | 1089.5  | 1948.02 | 18 |
| 11   | Q  | 1189.57 | 1217.56 | 1810.97 | 17 |
| 12   | I  | 1302.65 | 1330.65 | 1682.91 | 16 |
| 13   | L  | 1415.74 | 1443.73 | 1569.82 | 15 |
| 14   | E  | 1544.78 | 1572.77 | 1456.74 | 14 |
| 15   | E  | 1673.82 | 1701.82 | 1327.7  | 13 |
| 16   | A  | 1744.86 | 1772.85 | 1198.65 | 12 |
| 17   | Q  | 1872.92 | 1900.91 | 1127.62 | 11 |
| 18   | A  | 1943.95 | 1971.95 | 999.56  | 10 |
| 19   | G  | 2000.97 | 2028.97 | 928.52  | 9  |
| 20   | D  | 2116    | 2144    | 871.5   | 8  |
| 21   | Q  | 2244.06 | 2272.06 | 756.47  | 7  |
| 22   | L  | 2357.14 | 2385.14 | 628.41  | 6  |
| 23   | G  | 2414.17 | 2442.16 | 515.33  | 5  |
| 24   | A  | 2485.2  | 2513.2  | 458.31  | 4  |
| 25   | L  | 2598.29 | 2626.28 | 387.27  | 3  |
| 26   | V  | 2697.36 | 2725.35 | 274.19  | 2  |
| 27   | R  | -       | -       | 175.12  | 1  |

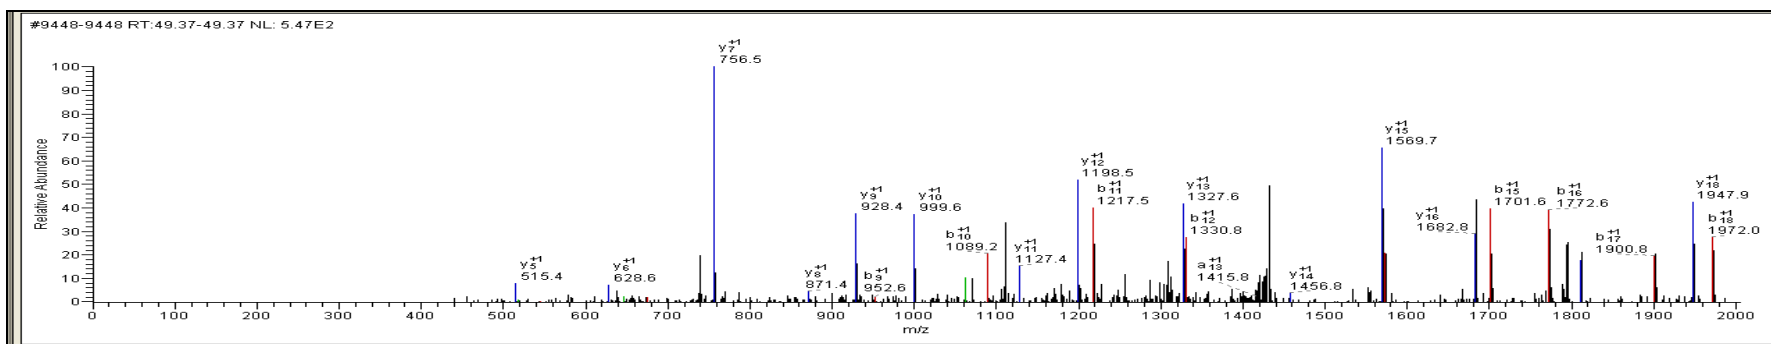

# NP\_524846.1 enhancer of yellow 2 CG15191-PA

## K.GTNNSTVEQLIAEVTPK.A

|    | AA | A       | B       | Y       |    |
|----|----|---------|---------|---------|----|
| 1  | G  | 30.03   | 58.03   | -       | 18 |
| 2  | T  | 131.08  | 159.08  | 1890.98 | 17 |
| 3  | N  | 245.12  | 273.12  | 1789.93 | 16 |
| 4  | N  | 359.17  | 387.16  | 1675.89 | 15 |
| 5  | S  | 446.20  | 474.19  | 1561.85 | 14 |
| 6  | F  | 593.27  | 621.26  | 1474.82 | 13 |
| 7  | T  | 694.32  | 722.31  | 1327.75 | 12 |
| 8  | V  | 793.38  | 821.38  | 1226.70 | 11 |
| 9  | E  | 922.43  | 950.42  | 1127.63 | 10 |
| 10 | Q  | 1050.49 | 1078.48 | 998.59  | 9  |
| 11 | L  | 1163.57 | 1191.56 | 870.53  | 8  |
| 12 | I  | 1276.65 | 1304.65 | 757.45  | 7  |
| 13 | A  | 1347.69 | 1375.69 | 644.36  | 6  |
| 14 | E  | 1476.73 | 1504.73 | 573.32  | 5  |
| 15 | V  | 1575.80 | 1603.80 | 444.28  | 4  |
| 16 | T  | 1676.85 | 1704.84 | 345.21  | 3  |
| 17 | P  | 1773.90 | 1801.90 | 244.17  | 2  |
| 18 | K  | -       | -       | 147.11  | 1  |

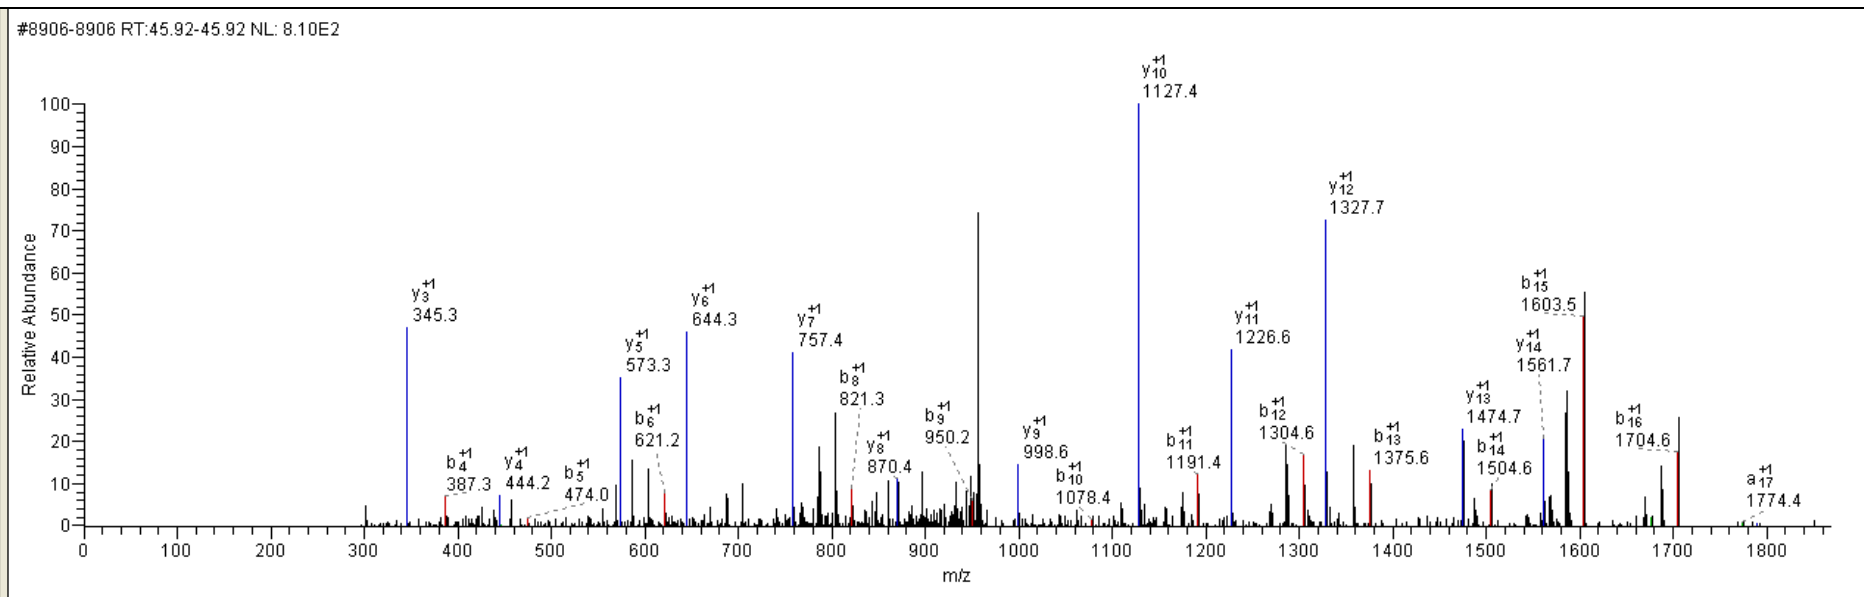

# e(y)3 NP\_608334.3 enhancer of yellow 3 CG12238-PA

## R.VSSTSSPAQRDQQLNADR.D

|    | AA | A       | B       | Y       |    |
|----|----|---------|---------|---------|----|
| 1  | V  | 72.08   | 100.08  | -       | 18 |
| 2  | S  | 159.11  | 187.11  | 1860.88 | 17 |
| 3  | S  | 246.14  | 274.14  | 1773.85 | 16 |
| 4  | T  | 347.19  | 375.19  | 1686.82 | 15 |
| 5  | S  | 434.22  | 462.22  | 1585.77 | 14 |
| 6  | S  | 521.26  | 549.25  | 1498.74 | 13 |
| 7  | P  | 618.31  | 646.30  | 1411.70 | 12 |
| 8  | A  | 689.35  | 717.34  | 1314.65 | 11 |
| 9  | Q  | 817.41  | 845.40  | 1243.61 | 10 |
| 10 | R  | 973.51  | 1001.50 | 1115.56 | 9  |
| 11 | D  | 1088.53 | 1116.53 | 959.45  | 8  |
| 12 | Q  | 1216.59 | 1244.59 | 844.43  | 7  |
| 13 | Q  | 1344.65 | 1372.65 | 716.37  | 6  |
| 14 | L  | 1457.73 | 1485.73 | 588.31  | 5  |
| 15 | N  | 1571.78 | 1599.77 | 475.23  | 4  |
| 16 | A  | 1642.81 | 1670.81 | 361.18  | 3  |
| 17 | D  | 1757.84 | 1785.84 | 290.15  | 2  |
| 18 | R  | -       | -       | 175.12  | 1  |

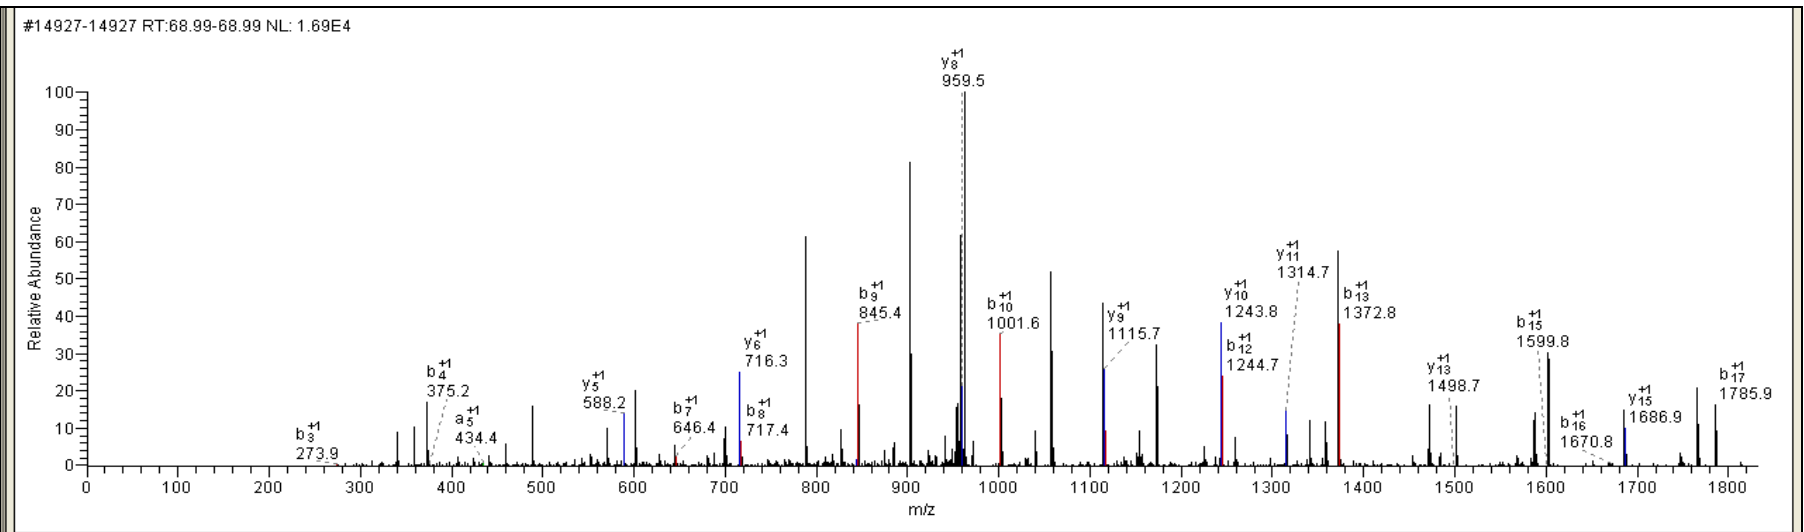

# Ets97D NP\_524523.2 Ets at 97D CG6338-PA

## R.IMSANSISTNSGGSLSLR.I

|    | AA | A       | B       | Y       |    |
|----|----|---------|---------|---------|----|
| 1  | I  | 86.10   | 114.09  | -       | 20 |
| 2  | M* | 233.13  | 261.13  | 1954.91 | 19 |
| 3  | S  | 320.16  | 348.16  | 1807.88 | 18 |
| 4  | A  | 391.20  | 419.20  | 1720.85 | 17 |
| 5  | N  | 505.24  | 533.24  | 1649.81 | 16 |
| 6  | S  | 592.28  | 620.27  | 1535.77 | 15 |
| 7  | I  | 705.36  | 733.35  | 1448.73 | 14 |
| 8  | S  | 792.39  | 820.39  | 1335.65 | 13 |
| 9  | T  | 893.44  | 921.43  | 1248.62 | 12 |
| 10 | N  | 1007.48 | 1035.48 | 1147.57 | 11 |
| 11 | S  | 1094.51 | 1122.51 | 1033.53 | 10 |
| 12 | G  | 1151.54 | 1179.53 | 946.50  | 9  |
| 13 | G  | 1208.56 | 1236.55 | 889.47  | 8  |
| 14 | S  | 1295.59 | 1323.58 | 832.45  | 7  |
| 15 | L  | 1408.67 | 1436.67 | 745.42  | 6  |
| 16 | S  | 1495.71 | 1523.70 | 632.34  | 5  |
| 17 | L  | 1608.79 | 1636.78 | 545.30  | 4  |
| 18 | E  | 1737.83 | 1765.83 | 432.22  | 3  |
| 19 | Q  | 1865.89 | 1893.89 | 303.18  | 2  |
| 20 | R  | -       | -       | 175.12  | 1  |

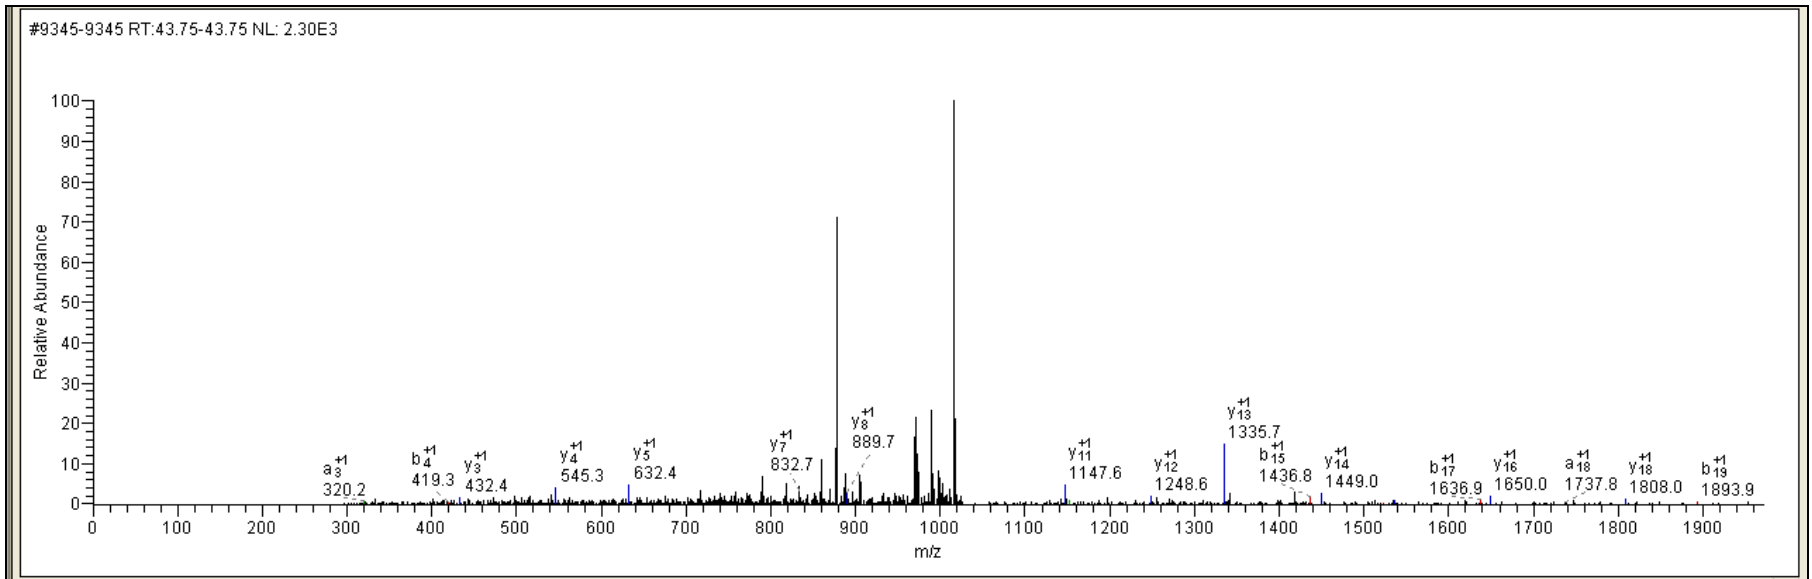

eIF-4a NP\_723137.1 Eukaryotic initiation factor 4a CG9075-PA

R.ILKDIEQFYHTTIEEMPANIADLI

| S no | AA | A       | B       | Y       |    |
|------|----|---------|---------|---------|----|
| 1    | I  | 86.1    | 114.09  | -       | 24 |
| 2    | L  | 199.18  | 227.18  | 2704.35 | 23 |
| 3    | K  | 327.28  | 355.27  | 2591.27 | 22 |
| 4    | D  | 442.3   | 470.3   | 2463.17 | 21 |
| 5    | I  | 555.39  | 583.38  | 2348.15 | 20 |
| 6    | E  | 684.43  | 712.42  | 2235.06 | 19 |
| 7    | Q  | 812.49  | 840.48  | 2106.02 | 18 |
| 8    | F  | 959.56  | 987.55  | 1977.96 | 17 |
| 9    | Y  | 1122.62 | 1150.61 | 1830.89 | 16 |
| 10   | H  | 1259.68 | 1287.67 | 1667.83 | 15 |
| 11   | T  | 1360.73 | 1388.72 | 1530.77 | 14 |
| 12   | T  | 1461.77 | 1489.77 | 1429.72 | 13 |
| 13   | I  | 1574.86 | 1602.85 | 1328.68 | 12 |
| 14   | E  | 1703.9  | 1731.9  | 1215.59 | 11 |
| 15   | E  | 1832.94 | 1860.94 | 1086.55 | 10 |
| 16   | M  | 1963.98 | 1991.98 | 957.51  | 9  |
| 17   | P  | 2061.04 | 2089.03 | 826.47  | 8  |
| 18   | A  | 2132.07 | 2160.07 | 729.41  | 7  |
| 19   | N  | 2246.12 | 2274.11 | 658.38  | 6  |
| 20   | I  | 2359.2  | 2387.2  | 544.33  | 5  |
| 21   | A  | 2430.24 | 2458.23 | 431.25  | 4  |
| 22   | D  | 2545.26 | 2573.26 | 360.21  | 3  |
| 23   | L  | 2658.35 | 2686.34 | 245.19  | 2  |
| 24   | I  | -       | -       | 132.1   | 1  |

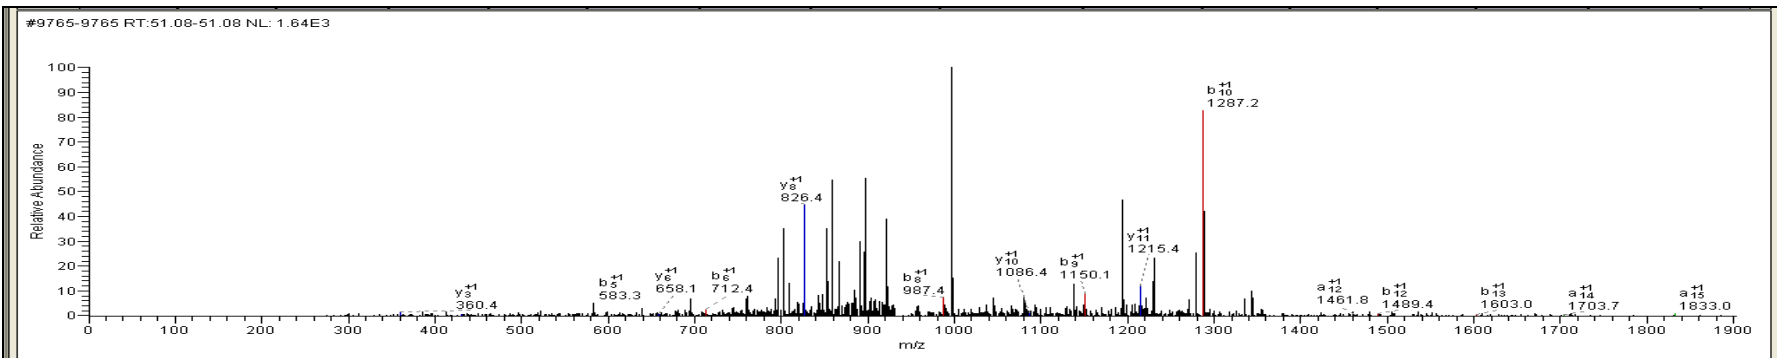

eIF4G NP\_524640.3

Eukaryotic-initiation-factor-4G CG10811-PA

K.MGGLTQFIWISSDTTR.L

|    | AA | A       | B       | Y       |    |
|----|----|---------|---------|---------|----|
| 1  | M  | 104.05  | 132.05  | -       | 16 |
| 2  | G  | 161.07  | 189.07  | 1681.85 | 15 |
| 3  | G  | 218.10  | 246.09  | 1624.83 | 14 |
| 4  | L  | 331.18  | 359.17  | 1567.81 | 13 |
| 5  | T  | 432.23  | 460.22  | 1454.73 | 12 |
| 6  | Q  | 560.29  | 588.28  | 1353.68 | 11 |
| 7  | F  | 707.35  | 735.35  | 1225.62 | 10 |
| 8  | I  | 820.44  | 848.43  | 1078.55 | 9  |
| 9  | W  | 1006.52 | 1034.51 | 965.47  | 8  |
| 10 | I  | 1119.60 | 1147.60 | 779.39  | 7  |
| 11 | S  | 1206.63 | 1234.63 | 666.31  | 6  |
| 12 | S  | 1293.67 | 1321.66 | 579.27  | 5  |
| 13 | D  | 1408.69 | 1436.69 | 492.24  | 4  |
| 14 | T  | 1509.74 | 1537.74 | 377.21  | 3  |
| 15 | T  | 1610.79 | 1638.78 | 276.17  | 2  |
| 16 | R  | -       | -       | 175.12  | 1  |

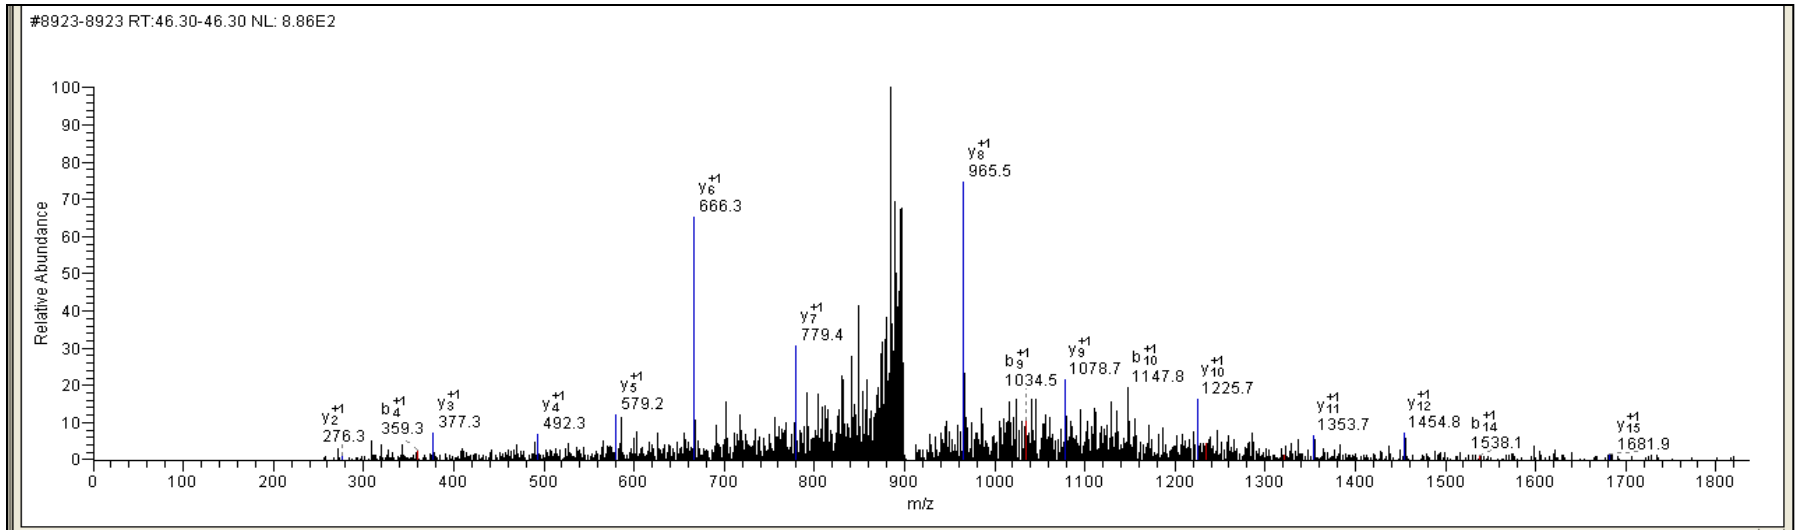



# Fatp NP\_524723.2

Fatty acid (long chain) transport protein CG7400-PA

## K.VANVLQAQGYK.K

|    | AA | A       | B       | Y       |    |
|----|----|---------|---------|---------|----|
| 1  | V  | 72.08   | 100.08  | -       | 11 |
| 2  | A  | 143.12  | 171.11  | 1091.58 | 10 |
| 3  | N  | 257.16  | 285.16  | 1020.55 | 9  |
| 4  | V  | 356.23  | 384.22  | 906.50  | 8  |
| 5  | L  | 469.31  | 497.31  | 807.44  | 7  |
| 6  | Q  | 597.37  | 625.37  | 694.35  | 6  |
| 7  | A  | 668.41  | 696.40  | 566.29  | 5  |
| 8  | Q  | 796.47  | 824.46  | 495.26  | 4  |
| 9  | G  | 853.49  | 881.48  | 367.20  | 3  |
| 10 | Y  | 1016.55 | 1044.55 | 310.18  | 2  |
| 11 | K  | -       | -       | 147.11  | 1  |

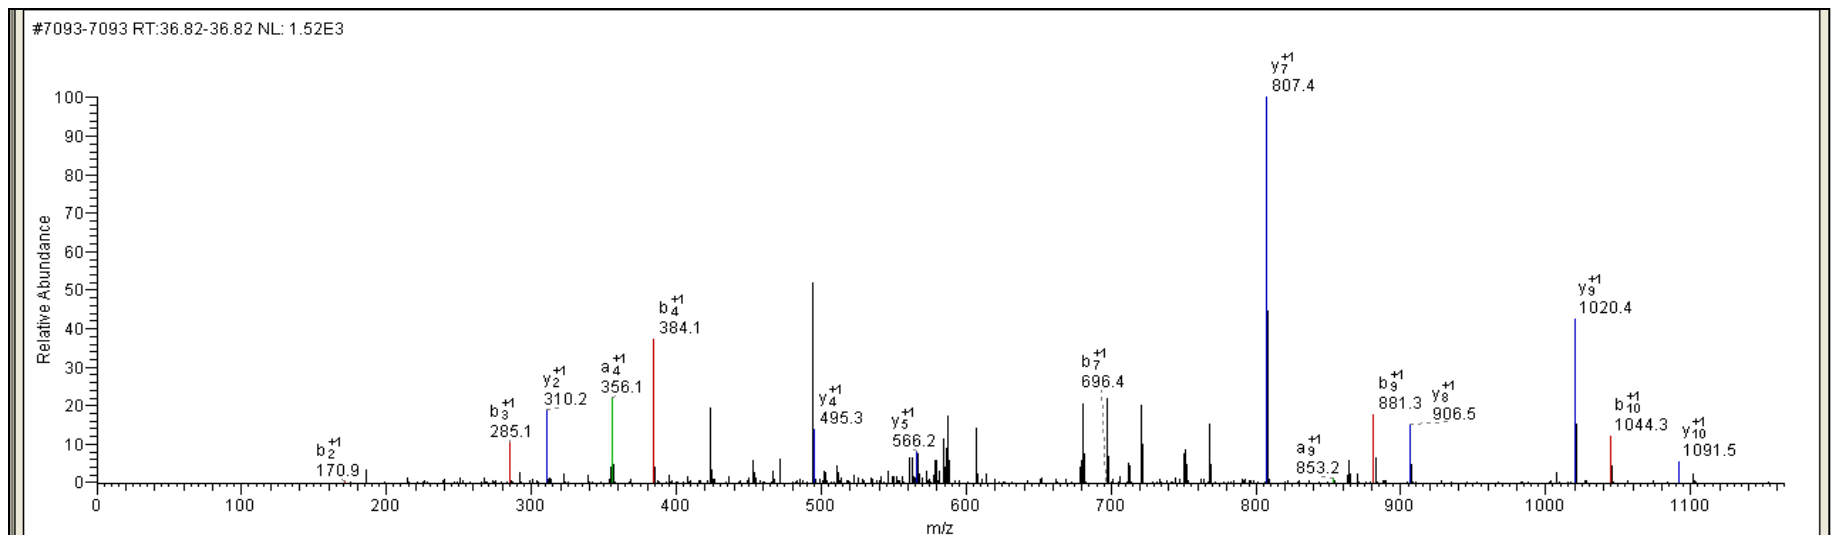

fau NP\_650015.3 fau CG6544-PA

R.ALTNYLNTEPFTTFSEETSR.I

|    | AA | A       | B       | Y       |    |
|----|----|---------|---------|---------|----|
| 1  | A  | 44.05   | 72.04   | -       | 20 |
| 2  | L  | 157.13  | 185.13  | 2250.06 | 19 |
| 3  | T  | 258.18  | 286.18  | 2136.97 | 18 |
| 4  | N  | 372.22  | 400.22  | 2035.92 | 17 |
| 5  | Y  | 535.29  | 563.28  | 1921.88 | 16 |
| 6  | L  | 648.37  | 676.37  | 1758.82 | 15 |
| 7  | N  | 762.41  | 790.41  | 1645.73 | 14 |
| 8  | T  | 863.46  | 891.46  | 1531.69 | 13 |
| 9  | E  | 992.50  | 1020.50 | 1430.64 | 12 |
| 10 | P  | 1089.56 | 1117.55 | 1301.60 | 11 |
| 11 | F  | 1236.63 | 1264.62 | 1204.55 | 10 |
| 12 | T  | 1337.67 | 1365.67 | 1057.48 | 9  |
| 13 | T  | 1438.72 | 1466.72 | 956.43  | 8  |
| 14 | F  | 1585.79 | 1613.78 | 855.38  | 7  |
| 15 | S  | 1672.82 | 1700.82 | 708.32  | 6  |
| 16 | E  | 1801.86 | 1829.86 | 621.28  | 5  |
| 17 | E  | 1930.91 | 1958.90 | 492.24  | 4  |
| 18 | T  | 2031.95 | 2059.95 | 363.20  | 3  |
| 19 | S  | 2118.99 | 2146.98 | 262.15  | 2  |
| 20 | R  | -       | -       | 175.12  | 1  |

#13980-13980 RT:64.69-64.69 NL: 7.97E3

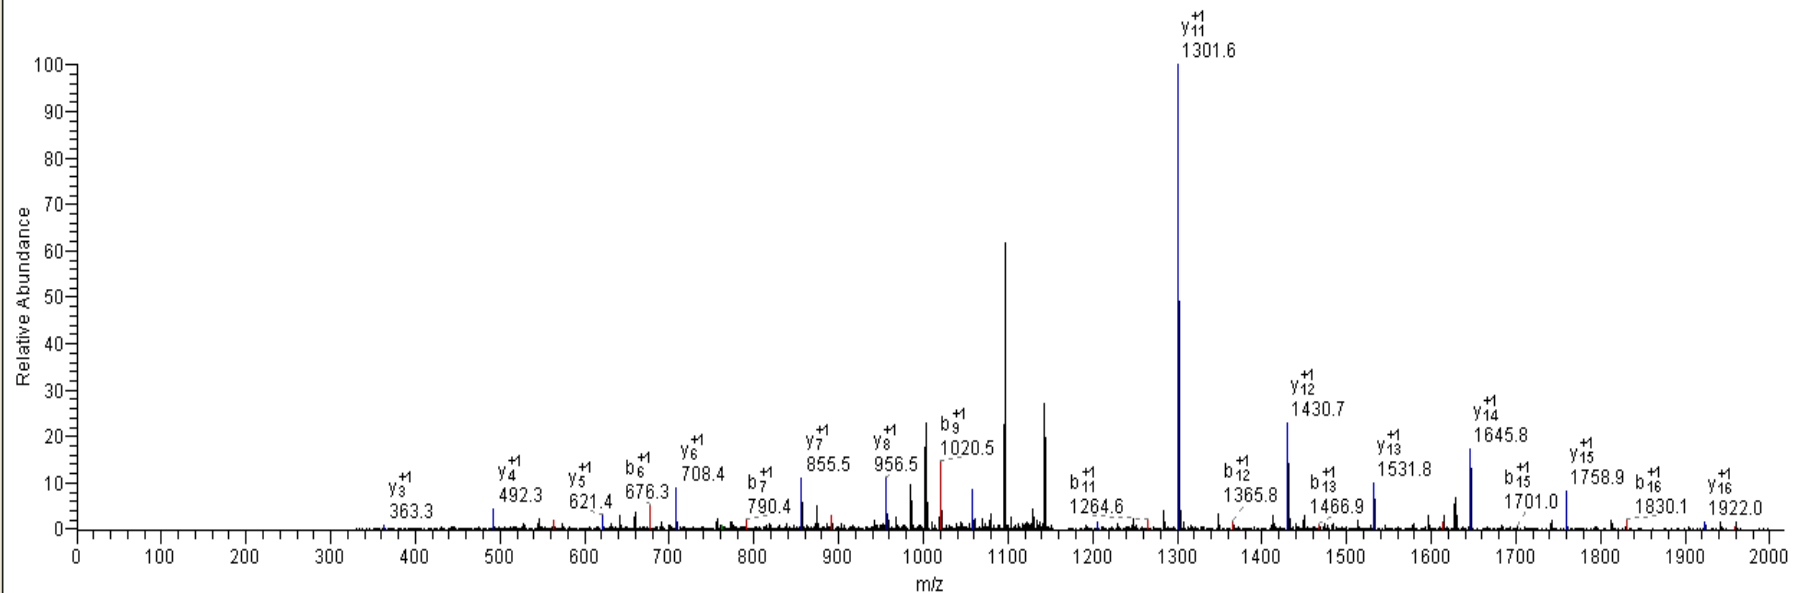

Supplement: supp_M110.001362_mcp.M110.001362-4.pdf [file supp_M110.001362_mcp.M110.001362-4.pdf]
