# Supplementary material
Source: PubMed Central journal article supplement (PMC2938118)

# NP\_724177.1 fondue CG15825-PA

## R.AGYHAVTASVDDNGKIGTHSVHS

| S no | AA | A       | B       | Y       |    |
|------|----|---------|---------|---------|----|
| 1    | A  | 44.05   | 72.04   | -       | 23 |
| 2    | G  | 101.07  | 129.07  | 2252.07 | 22 |
| 3    | Y  | 264.13  | 292.13  | 2195.05 | 21 |
| 4    | H  | 401.19  | 429.19  | 2031.98 | 20 |
| 5    | A  | 472.23  | 500.23  | 1894.93 | 19 |
| 6    | V  | 571.3   | 599.29  | 1823.89 | 18 |
| 7    | T  | 672.35  | 700.34  | 1724.82 | 17 |
| 8    | A  | 743.38  | 771.38  | 1623.77 | 16 |
| 9    | S  | 830.42  | 858.41  | 1552.74 | 15 |
| 10   | V  | 929.48  | 957.48  | 1465.7  | 14 |
| 11   | D  | 1044.51 | 1072.51 | 1366.63 | 13 |
| 12   | D  | 1159.54 | 1187.53 | 1251.61 | 12 |
| 13   | N  | 1273.58 | 1301.58 | 1136.58 | 11 |
| 14   | G  | 1330.6  | 1358.6  | 1022.54 | 10 |
| 15   | K  | 1458.7  | 1486.69 | 965.52  | 9  |
| 16   | I  | 1571.78 | 1599.78 | 837.42  | 8  |
| 17   | G  | 1628.8  | 1656.8  | 724.34  | 7  |
| 18   | T  | 1729.85 | 1757.85 | 667.32  | 6  |
| 19   | H  | 1866.91 | 1894.9  | 566.27  | 5  |
| 20   | S  | 1953.94 | 1981.94 | 429.21  | 4  |
| 21   | V  | 2053.01 | 2081    | 342.18  | 3  |
| 22   | H  | 2190.07 | 2218.06 | 243.11  | 2  |
| 23   | S  | -       | -       | 106.05  | 1  |

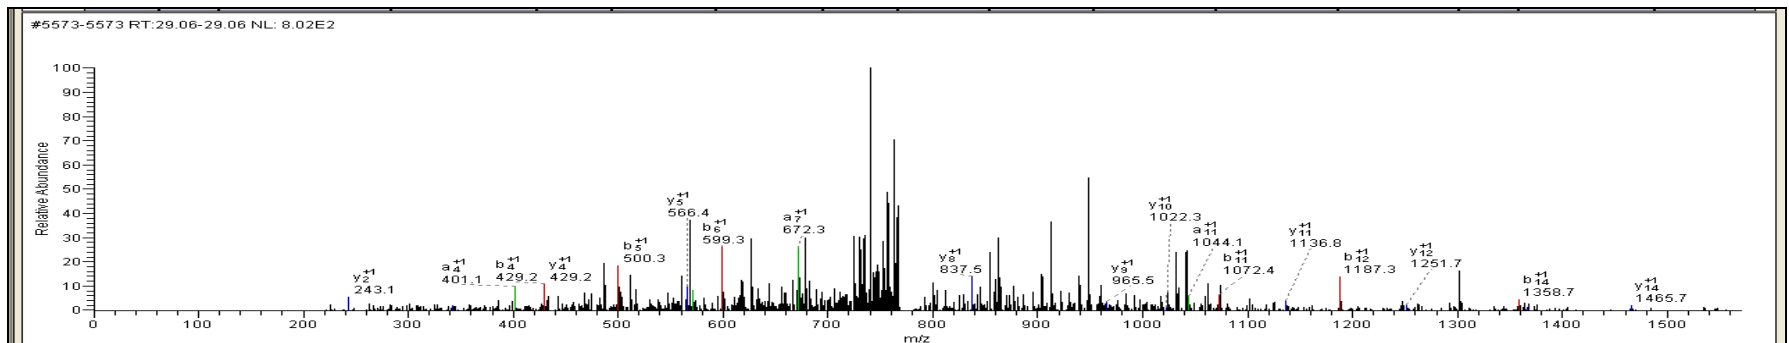

glu NP\_723996.1 gluon CG11397-PA

K.GQTENETGMLEYLEDIVGTQR.Y

|    | AA | A       | B       | Y       |    |
|----|----|---------|---------|---------|----|
| 1  | G  | 30.03   | 58.03   | -       | 21 |
| 2  | Q  | 158.09  | 186.09  | 2326.09 | 20 |
| 3  | T  | 259.14  | 287.13  | 2198.03 | 19 |
| 4  | E  | 388.18  | 416.18  | 2096.98 | 18 |
| 5  | N  | 502.23  | 530.22  | 1967.94 | 17 |
| 6  | E  | 631.27  | 659.26  | 1853.89 | 16 |
| 7  | T  | 732.32  | 760.31  | 1724.85 | 15 |
| 8  | G  | 789.34  | 817.33  | 1623.80 | 14 |
| 9  | M  | 920.38  | 948.37  | 1566.78 | 13 |
| 10 | L  | 1033.46 | 1061.46 | 1435.74 | 12 |
| 11 | E  | 1162.50 | 1190.50 | 1322.66 | 11 |
| 12 | Y  | 1325.57 | 1353.56 | 1193.62 | 10 |
| 13 | L  | 1438.65 | 1466.65 | 1030.55 | 9  |
| 14 | E  | 1567.69 | 1595.69 | 917.47  | 8  |
| 15 | D  | 1682.72 | 1710.72 | 788.43  | 7  |
| 16 | I  | 1795.81 | 1823.80 | 673.40  | 6  |
| 17 | V  | 1894.87 | 1922.87 | 560.32  | 5  |
| 18 | G  | 1951.90 | 1979.89 | 461.25  | 4  |
| 19 | T  | 2052.94 | 2080.94 | 404.23  | 3  |
| 20 | Q  | 2181.00 | 2209.00 | 303.18  | 2  |
| 21 | R  | -       | -       | 175.12  | 1  |

#9119-9119 RT:47.58-47.58 NL: 2.35E2

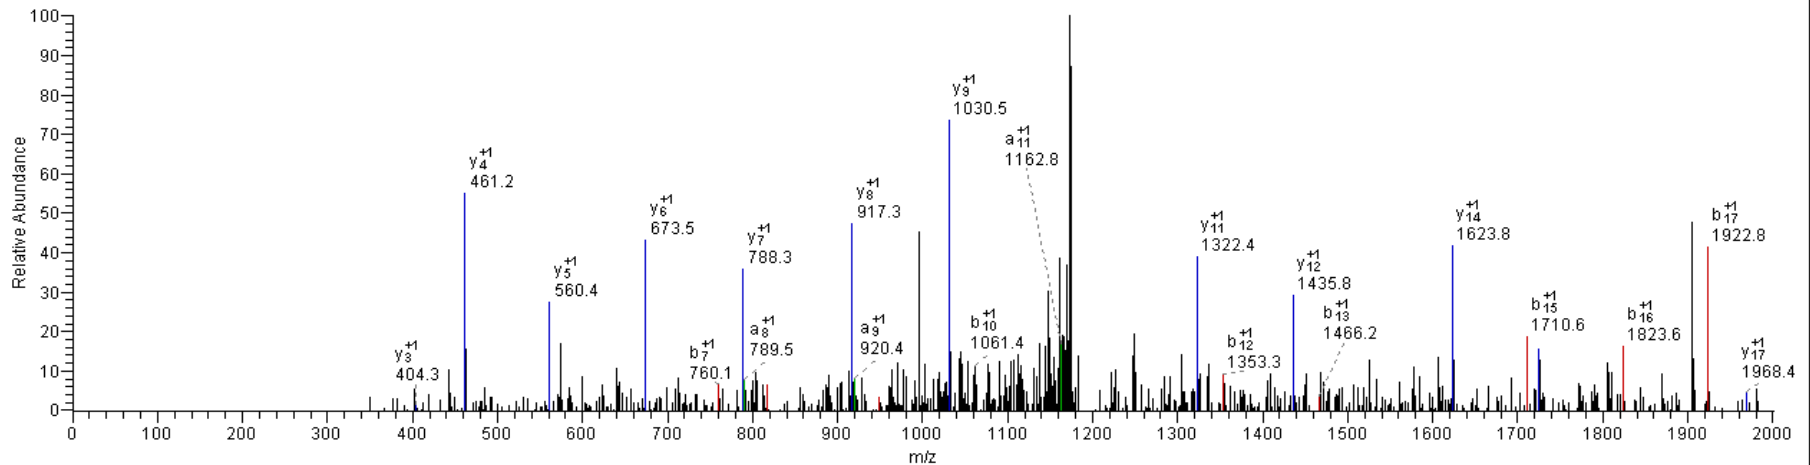

# GstD1 NP\_524326.1 Glutathione S transferase D1 CG10045-PA

## K.LLNLQAGEHLKPEFLK.I

|    | AA | A       | B       | Y       |    |
|----|----|---------|---------|---------|----|
| 1  | L  | 86.10   | 114.09  | -       | 16 |
| 2  | L  | 199.18  | 227.18  | 1736.97 | 15 |
| 3  | N  | 313.22  | 341.22  | 1623.89 | 14 |
| 4  | L  | 426.31  | 454.30  | 1509.84 | 13 |
| 5  | Q  | 554.37  | 582.36  | 1396.76 | 12 |
| 6  | A  | 625.40  | 653.40  | 1268.70 | 11 |
| 7  | G  | 682.42  | 710.42  | 1197.66 | 10 |
| 8  | E  | 811.47  | 839.46  | 1140.64 | 9  |
| 9  | H  | 948.53  | 976.52  | 1011.60 | 8  |
| 10 | L  | 1061.61 | 1089.61 | 874.54  | 7  |
| 11 | K  | 1189.71 | 1217.70 | 761.46  | 6  |
| 12 | P  | 1286.76 | 1314.75 | 633.36  | 5  |
| 13 | E  | 1415.80 | 1443.80 | 536.31  | 4  |
| 14 | F  | 1562.87 | 1590.86 | 407.27  | 3  |
| 15 | L  | 1675.95 | 1703.95 | 260.20  | 2  |
| 16 | K  | -       | -       | 147.11  | 1  |

#6958-6958 RT:36.15-36.15 NL: 1.37E3

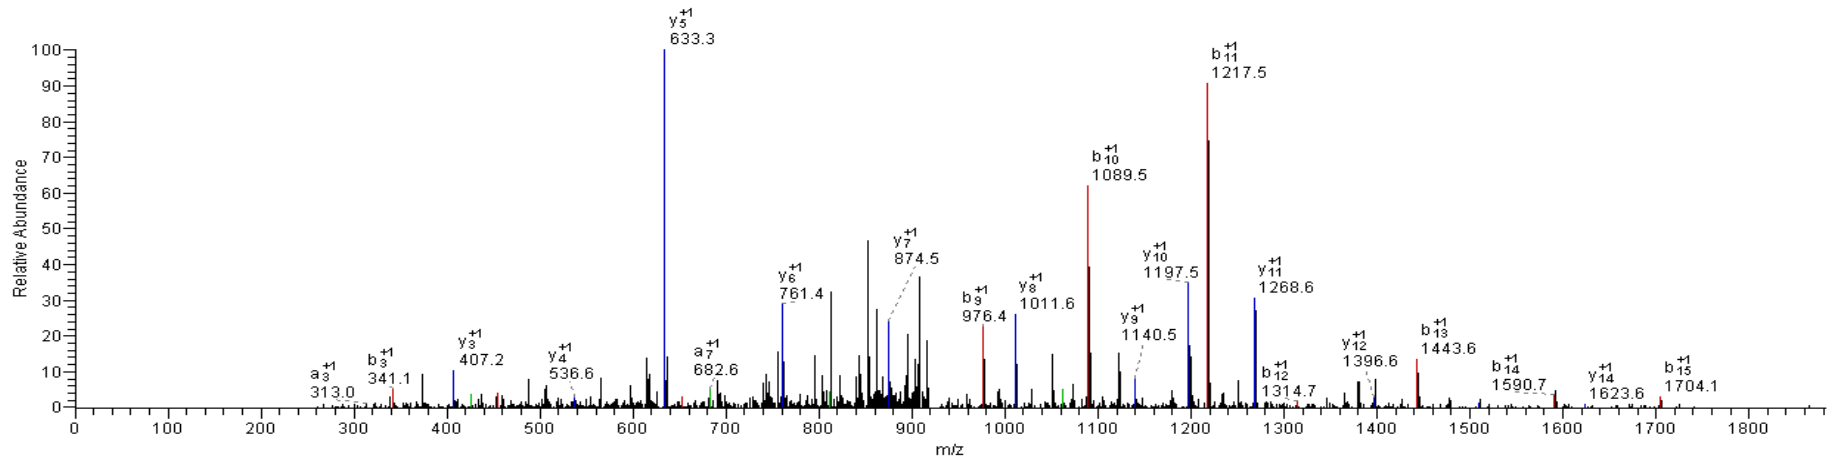

# Gp93 NP\_651601.1 Glycoprotein 93 CG5520-PA

## R.ELISNASDAIDKIR.L

|    | AA | A       | B       | Y       |    |
|----|----|---------|---------|---------|----|
| 1  | E  | 102.05  | 130.05  | -       | 14 |
| 2  | L  | 215.14  | 243.13  | 1415.79 | 13 |
| 3  | I  | 328.22  | 356.22  | 1302.70 | 12 |
| 4  | S  | 415.26  | 443.25  | 1189.62 | 11 |
| 5  | N  | 529.30  | 557.29  | 1102.59 | 10 |
| 6  | A  | 600.34  | 628.33  | 988.54  | 9  |
| 7  | S  | 687.37  | 715.36  | 917.51  | 8  |
| 8  | D  | 802.39  | 830.39  | 830.47  | 7  |
| 9  | A  | 873.43  | 901.43  | 715.45  | 6  |
| 10 | I  | 986.52  | 1014.51 | 644.41  | 5  |
| 11 | D  | 1101.54 | 1129.54 | 531.32  | 4  |
| 12 | K  | 1229.64 | 1257.63 | 416.30  | 3  |
| 13 | I  | 1342.72 | 1370.72 | 288.20  | 2  |
| 14 | R  | -       | -       | 175.12  | 1  |

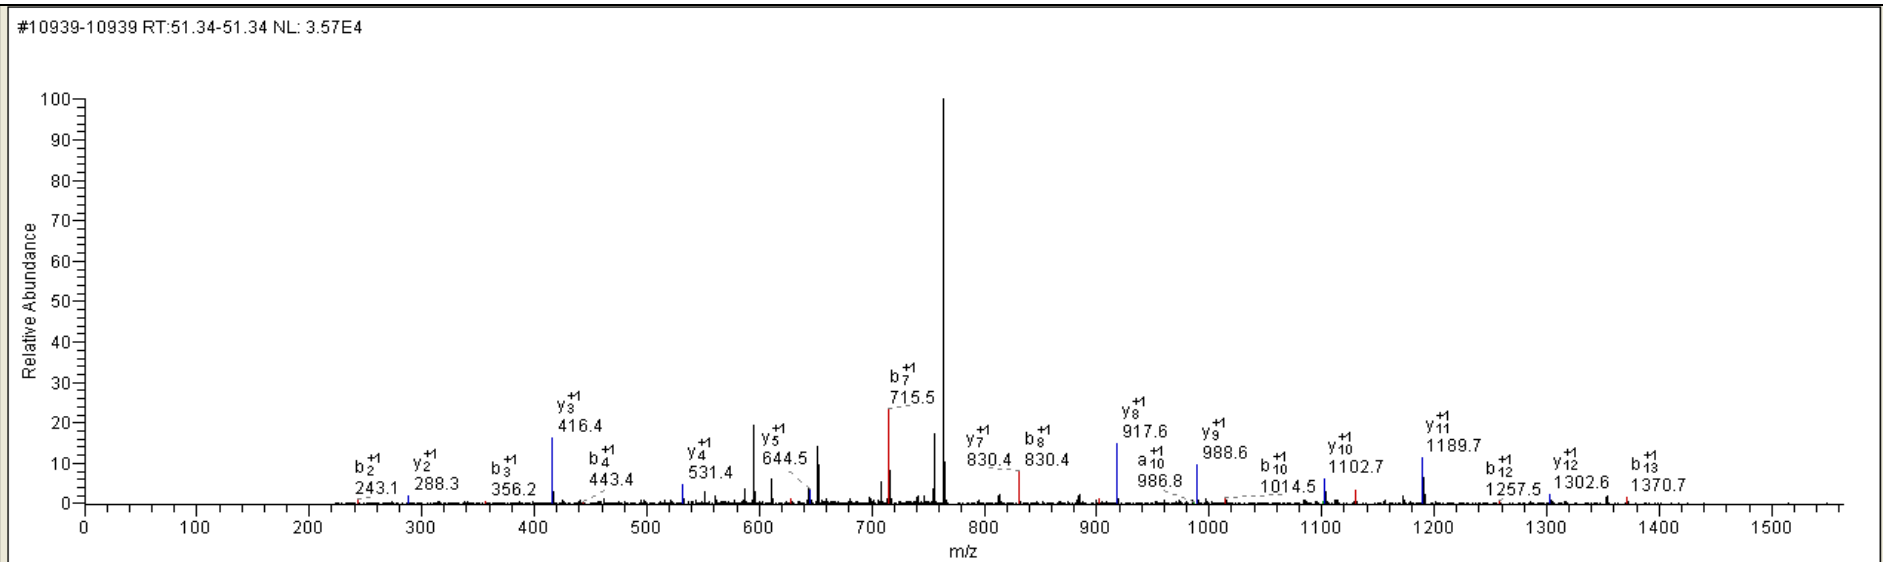

# Hel89B NP\_732097.1 Helicase 89B CG4261-PA

## K.ILTLDQIEAVATTLSENLR.S

|    | AA | A       | B       | Y       |    |
|----|----|---------|---------|---------|----|
| 1  | I  | 86.10   | 114.09  | -       | 19 |
| 2  | L  | 199.18  | 227.18  | 1987.07 | 18 |
| 3  | T  | 300.23  | 328.22  | 1873.99 | 17 |
| 4  | L  | 413.31  | 441.31  | 1772.94 | 16 |
| 5  | D  | 528.34  | 556.33  | 1659.85 | 15 |
| 6  | Q  | 656.40  | 684.39  | 1544.83 | 14 |
| 7  | I  | 769.48  | 797.48  | 1416.77 | 13 |
| 8  | E  | 898.52  | 926.52  | 1303.69 | 12 |
| 9  | A  | 969.56  | 997.56  | 1174.64 | 11 |
| 10 | V  | 1068.63 | 1096.62 | 1103.61 | 10 |
| 11 | A  | 1139.67 | 1167.66 | 1004.54 | 9  |
| 12 | T  | 1240.71 | 1268.71 | 933.50  | 8  |
| 13 | T  | 1341.76 | 1369.76 | 832.45  | 7  |
| 14 | L  | 1454.85 | 1482.84 | 731.40  | 6  |
| 15 | S  | 1541.88 | 1569.87 | 618.32  | 5  |
| 16 | E  | 1670.92 | 1698.92 | 531.29  | 4  |
| 17 | N  | 1784.96 | 1812.96 | 402.25  | 3  |
| 18 | L  | 1898.05 | 1926.04 | 288.20  | 2  |
| 19 | R  | -       | -       | 175.12  | 1  |

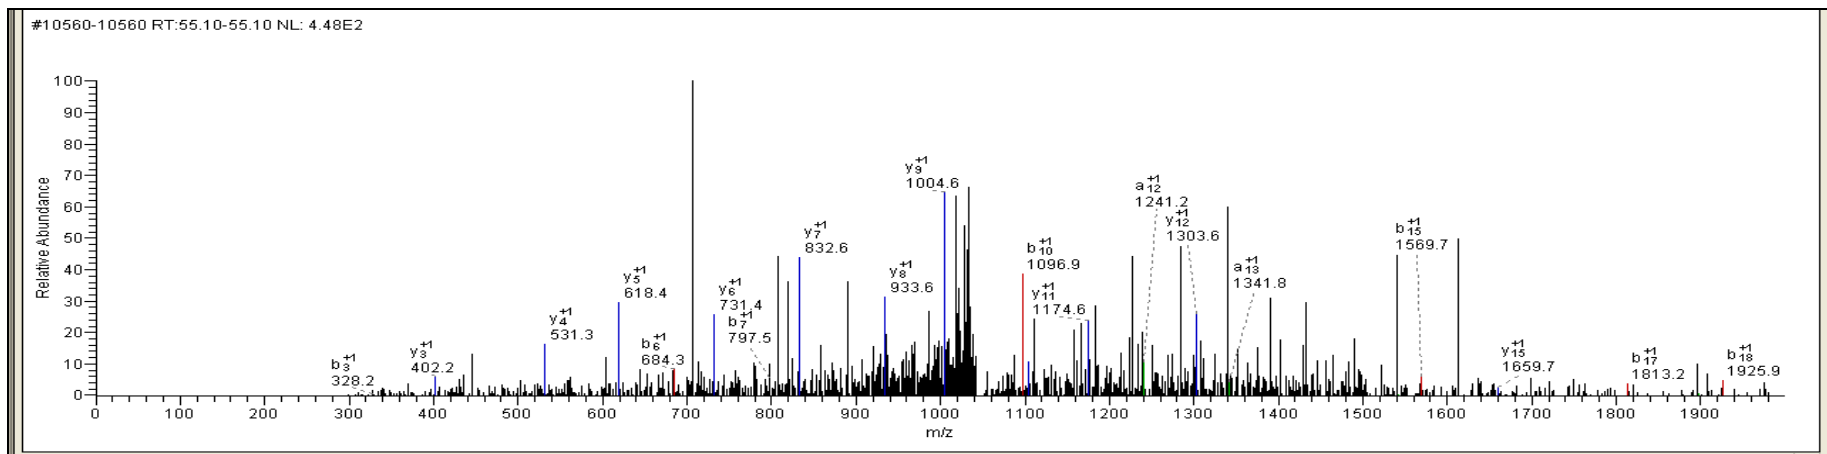

# His2Av NP\_524519.1 Histone H2A variant CG5499-PA

## R.AGLQFPVGR.I

|   | AA | A      | B      | Y      |   |
|---|----|--------|--------|--------|---|
| 1 | A  | 44.05  | 72.04  | -      | 9 |
| 2 | G  | 101.07 | 129.07 | 873.49 | 8 |
| 3 | L  | 214.16 | 242.15 | 816.47 | 7 |
| 4 | Q  | 342.21 | 370.21 | 703.39 | 6 |
| 5 | F  | 489.28 | 517.28 | 575.33 | 5 |
| 6 | P  | 586.33 | 614.33 | 428.26 | 4 |
| 7 | V  | 685.40 | 713.40 | 331.21 | 3 |
| 8 | G  | 742.42 | 770.42 | 232.14 | 2 |
| 9 | R  | -      | -      | 175.12 | 1 |

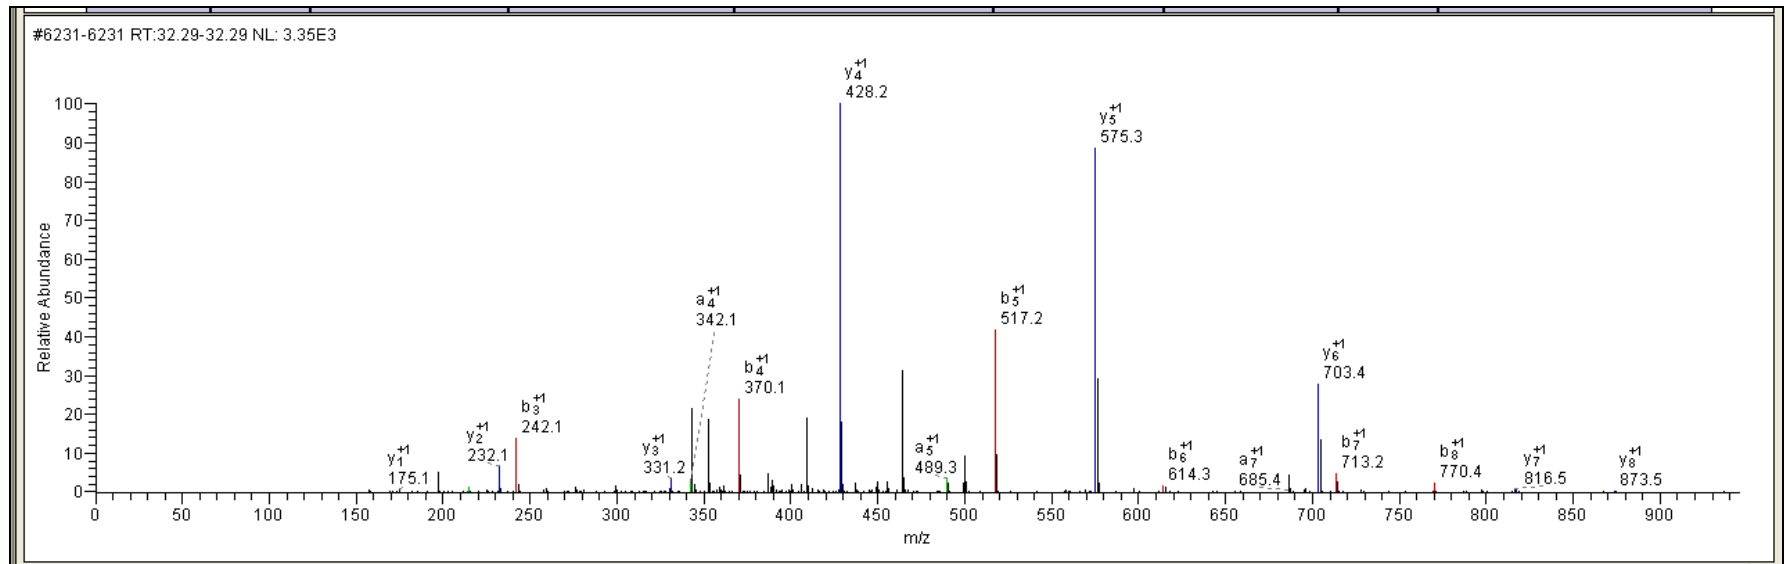

R.DGGAGASGILQQLSDIVGVPVSR.V

| S no | AA | A       | B       | Y       |    |
|------|----|---------|---------|---------|----|
| 1    | D  | 88.04   | 116.03  | -       | 23 |
| 2    | G  | 145.06  | 173.06  | 2081.13 | 22 |
| 3    | G  | 202.08  | 230.08  | 2024.11 | 21 |
| 4    | A  | 273.12  | 301.11  | 1967.09 | 20 |
| 5    | G  | 330.14  | 358.14  | 1896.05 | 19 |
| 6    | A  | 401.18  | 429.17  | 1839.03 | 18 |
| 7    | S  | 488.21  | 516.2   | 1768    | 17 |
| 8    | G  | 545.23  | 573.23  | 1680.96 | 16 |
| 9    | I  | 658.32  | 686.31  | 1623.94 | 15 |
| 10   | L  | 771.4   | 799.39  | 1510.86 | 14 |
| 11   | Q  | 899.46  | 927.45  | 1397.77 | 13 |
| 12   | Q  | 1027.52 | 1055.51 | 1269.72 | 12 |
| 13   | L  | 1140.6  | 1168.6  | 1141.66 | 11 |
| 14   | S  | 1227.63 | 1255.63 | 1028.57 | 10 |
| 15   | D  | 1342.66 | 1370.65 | 941.54  | 9  |
| 16   | I  | 1455.74 | 1483.74 | 826.51  | 8  |
| 17   | V  | 1554.81 | 1582.81 | 713.43  | 7  |
| 18   | G  | 1611.83 | 1639.83 | 614.36  | 6  |
| 19   | V  | 1710.9  | 1738.9  | 557.34  | 5  |
| 20   | P  | 1807.95 | 1835.95 | 458.27  | 4  |
| 21   | V  | 1907.02 | 1935.02 | 361.22  | 3  |
| 22   | S  | 1994.06 | 2022.05 | 262.15  | 2  |
| 23   | R  | -       | -       | 175.12  | 1  |

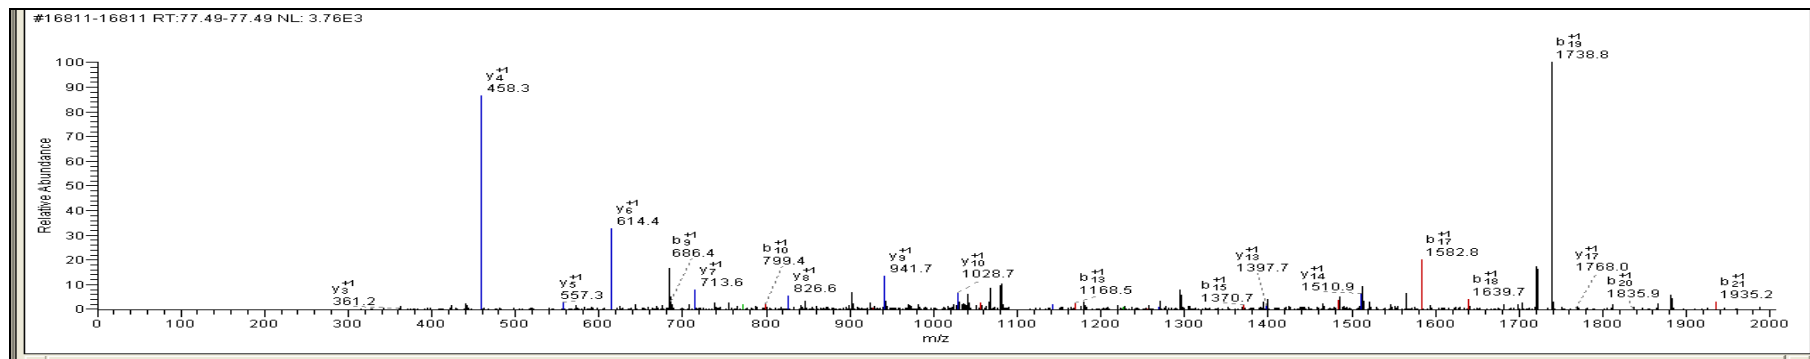

# NP\_572614.1 Interaction partner of Dnmt2 CG2961-PA

K.AILKADQAQGAFFK.S

|    | AA | A       | B       | Y       |    |
|----|----|---------|---------|---------|----|
| 1  | A  | 44.05   | 72.04   | -       | 15 |
| 2  | I  | 157.13  | 185.13  | 1549.87 | 14 |
| 3  | I  | 270.22  | 298.21  | 1436.79 | 13 |
| 4  | L  | 383.30  | 411.30  | 1323.71 | 12 |
| 5  | K  | 511.40  | 539.39  | 1210.62 | 11 |
| 6  | A  | 582.43  | 610.43  | 1082.53 | 10 |
| 7  | D  | 697.46  | 725.46  | 1011.49 | 9  |
| 8  | Q  | 825.52  | 853.51  | 896.46  | 8  |
| 9  | A  | 896.56  | 924.55  | 768.40  | 7  |
| 10 | Q  | 1024.81 | 1052.61 | 697.37  | 6  |
| 11 | G  | 1081.64 | 1109.63 | 569.31  | 5  |
| 12 | A  | 1152.67 | 1180.67 | 512.29  | 4  |
| 13 | F  | 1299.74 | 1327.74 | 441.25  | 3  |
| 14 | F  | 1446.81 | 1474.81 | 294.18  | 2  |
| 15 | K  | -       | -       | 147.11  | 1  |

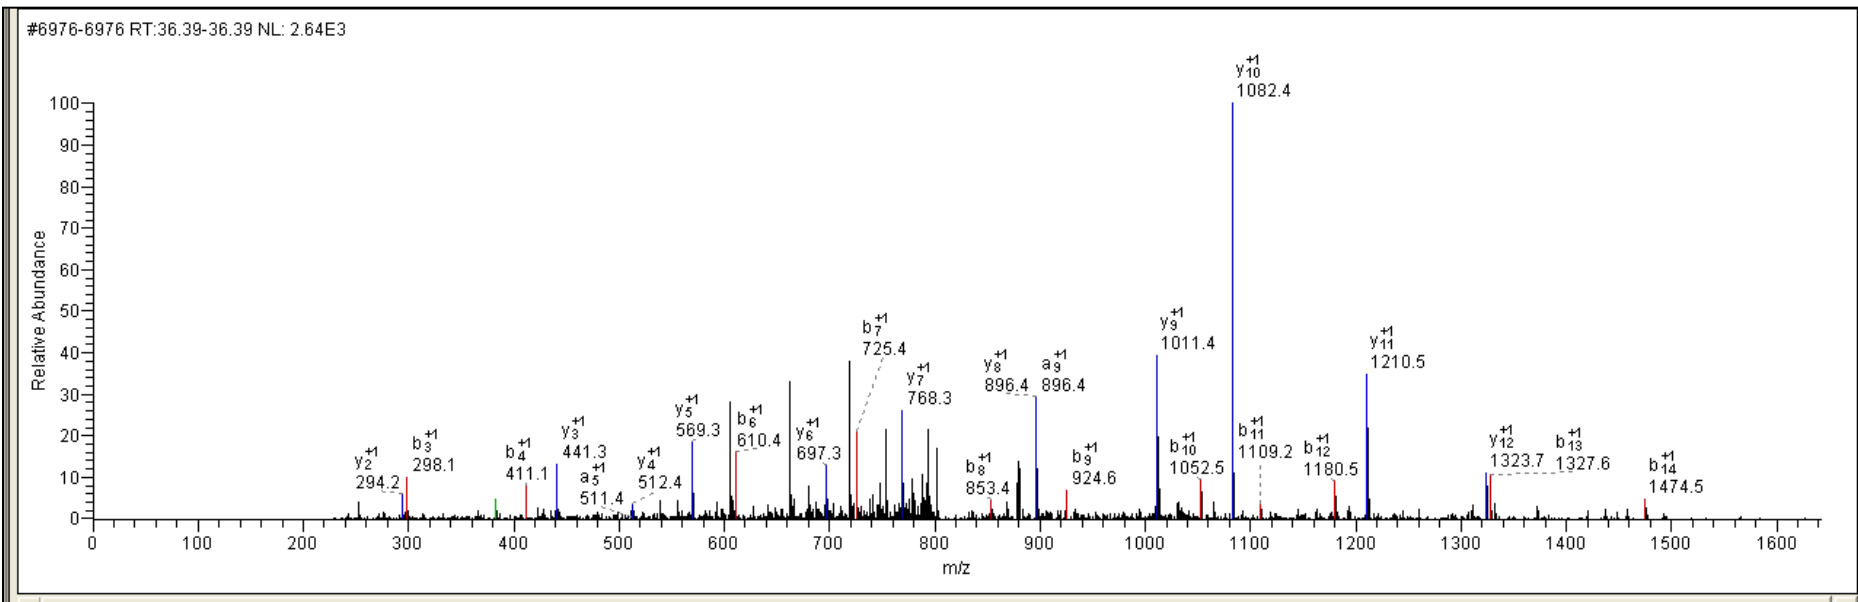



# Jupiter NP\_731595.1 Jupiter CG31363-PD

K.SGSVSSASSSVSSSTENLK.M

|    | AA | A       | B       | Y       |    |
|----|----|---------|---------|---------|----|
| 1  | S  | 60.04   | 88.04   | -       | 19 |
| 2  | G  | 117.07  | 145.06  | 1713.81 | 18 |
| 3  | S  | 204.10  | 232.09  | 1656.79 | 17 |
| 4  | V  | 303.17  | 331.16  | 1569.76 | 16 |
| 5  | S  | 390.20  | 418.19  | 1470.69 | 15 |
| 6  | S  | 477.23  | 505.23  | 1383.66 | 14 |
| 7  | A  | 548.27  | 576.26  | 1296.63 | 13 |
| 8  | S  | 635.30  | 663.29  | 1225.59 | 12 |
| 9  | S  | 722.33  | 750.33  | 1138.56 | 11 |
| 10 | S  | 809.36  | 837.36  | 1051.53 | 10 |
| 11 | V  | 908.43  | 936.43  | 964.49  | 9  |
| 12 | S  | 995.46  | 1023.46 | 865.43  | 8  |
| 13 | S  | 1082.50 | 1110.49 | 778.39  | 7  |
| 14 | S  | 1169.53 | 1197.52 | 691.36  | 6  |
| 15 | T  | 1270.58 | 1298.57 | 604.33  | 5  |
| 16 | E  | 1399.62 | 1427.61 | 503.28  | 4  |
| 17 | N  | 1513.66 | 1541.66 | 374.24  | 3  |
| 18 | L  | 1626.75 | 1654.74 | 260.20  | 2  |
| 19 | K  | -       | -       | 147.11  | 1  |

#5675-5675 RT:29.31-29.31 NL: 3.05E2

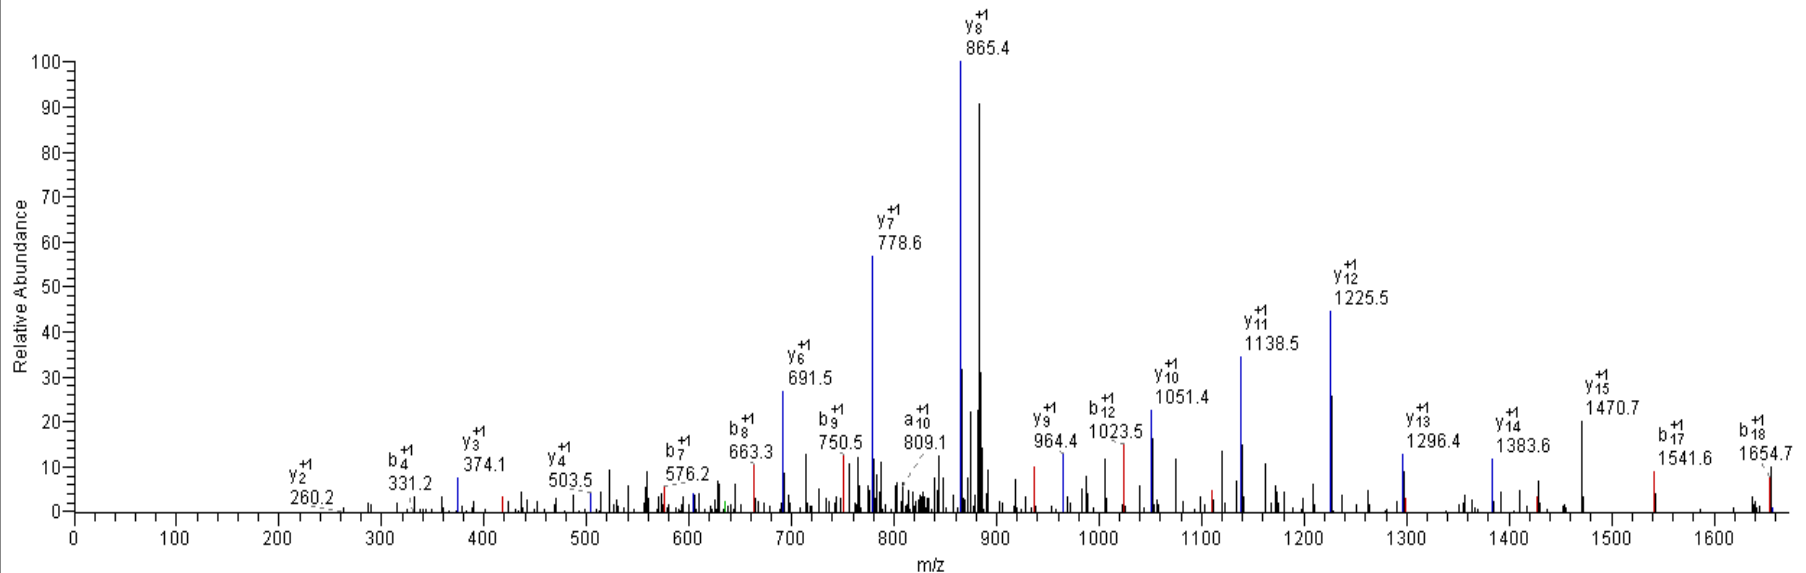

kis NP\_523441.1 kismet CG3696-PA

K.TFIWDLITPTEDGEVQK.I

|    | AA | A       | B       | Y       |    |
|----|----|---------|---------|---------|----|
| 1  | T  | 74.06   | 102.05  | -       | 17 |
| 2  | F  | 221.13  | 249.12  | 1890.95 | 16 |
| 3  | I  | 334.21  | 362.21  | 1743.88 | 15 |
| 4  | W  | 520.29  | 548.29  | 1630.80 | 14 |
| 5  | D  | 635.32  | 663.31  | 1444.72 | 13 |
| 6  | L  | 748.40  | 776.40  | 1329.69 | 12 |
| 7  | I  | 861.49  | 889.48  | 1216.61 | 11 |
| 8  | T  | 962.53  | 990.53  | 1103.52 | 10 |
| 9  | P  | 1059.59 | 1087.58 | 1002.47 | 9  |
| 10 | T  | 1160.64 | 1188.63 | 905.42  | 8  |
| 11 | E  | 1289.68 | 1317.67 | 804.37  | 7  |
| 12 | D  | 1404.70 | 1432.70 | 675.33  | 6  |
| 13 | G  | 1461.73 | 1489.72 | 560.30  | 5  |
| 14 | E  | 1590.77 | 1618.76 | 503.28  | 4  |
| 15 | V  | 1689.84 | 1717.83 | 374.24  | 3  |
| 16 | Q  | 1817.90 | 1845.89 | 275.17  | 2  |
| 17 | K  | -       | -       | 147.11  | 1  |

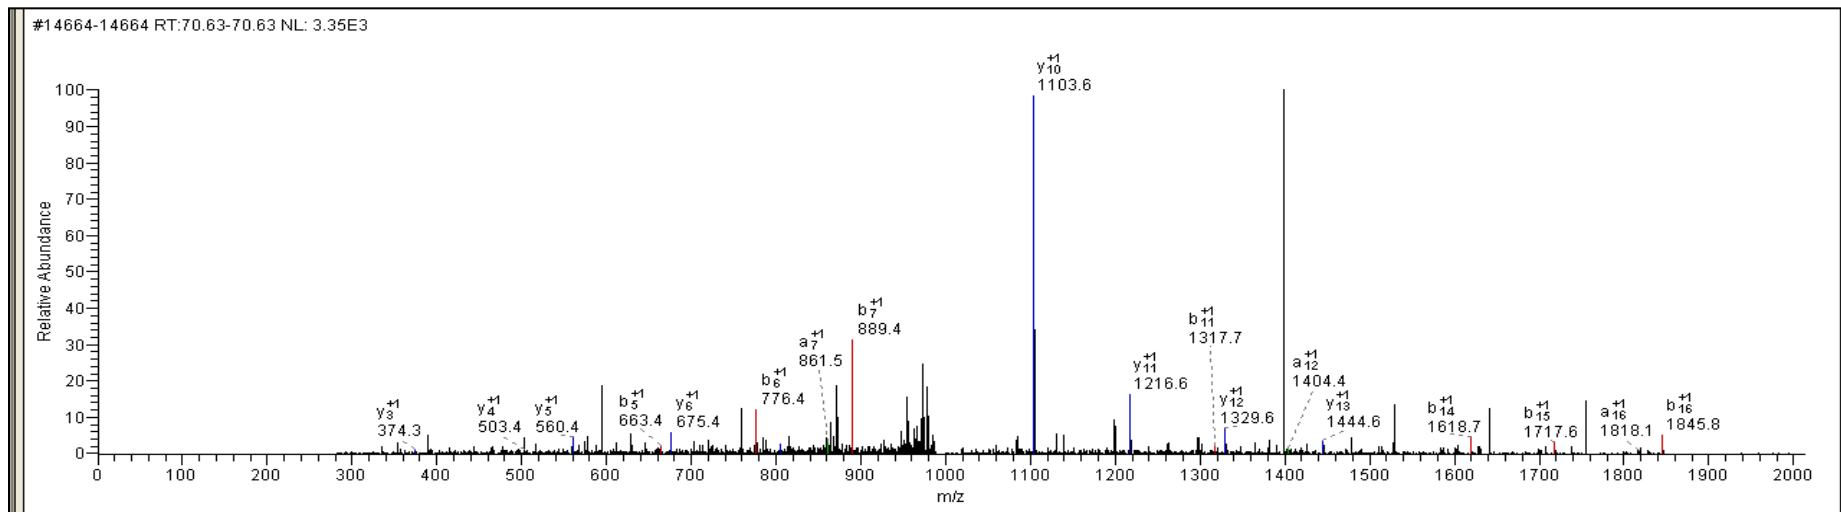

## K.ALTAEEYENILNHVNSYVQQLVELK.M

| S no | AA | A       | B       | Y       |    |
|------|----|---------|---------|---------|----|
| 1    | A  | 44.05   | 72.04   | -       | 25 |
| 2    | L  | 157.13  | 185.13  | 2846.46 | 24 |
| 3    | T  | 258.18  | 286.18  | 2733.37 | 23 |
| 4    | A  | 329.22  | 357.21  | 2632.33 | 22 |
| 5    | E  | 458.26  | 486.26  | 2561.29 | 21 |
| 6    | E  | 587.3   | 615.3   | 2432.25 | 20 |
| 7    | Y  | 750.37  | 778.36  | 2303.2  | 19 |
| 8    | E  | 879.41  | 907.4   | 2140.14 | 18 |
| 9    | N  | 993.45  | 1021.45 | 2011.1  | 17 |
| 10   | I  | 1106.54 | 1134.53 | 1897.05 | 16 |
| 11   | L  | 1219.62 | 1247.62 | 1783.97 | 15 |
| 12   | N  | 1333.66 | 1361.66 | 1670.89 | 14 |
| 13   | H  | 1470.72 | 1498.72 | 1556.84 | 13 |
| 14   | V  | 1569.79 | 1597.79 | 1419.78 | 12 |
| 15   | N  | 1683.83 | 1711.83 | 1320.72 | 11 |
| 16   | S  | 1770.87 | 1798.86 | 1206.67 | 10 |
| 17   | Y  | 1933.93 | 1961.92 | 1119.64 | 9  |
| 18   | V  | 2033    | 2060.99 | 956.58  | 8  |
| 19   | Q  | 2161.06 | 2189.05 | 857.51  | 7  |
| 20   | Q  | 2289.11 | 2317.11 | 729.45  | 6  |
| 21   | L  | 2402.2  | 2430.19 | 601.39  | 5  |
| 22   | V  | 2501.27 | 2529.26 | 488.31  | 4  |
| 23   | E  | 2630.31 | 2658.3  | 389.24  | 3  |
| 24   | L  | 2743.39 | 2771.39 | 260.2   | 2  |
| 25   | K  | -       | -       | 147.11  | 1  |

#17187-17187 RT:84.59-84.59 NL: 2.26E3

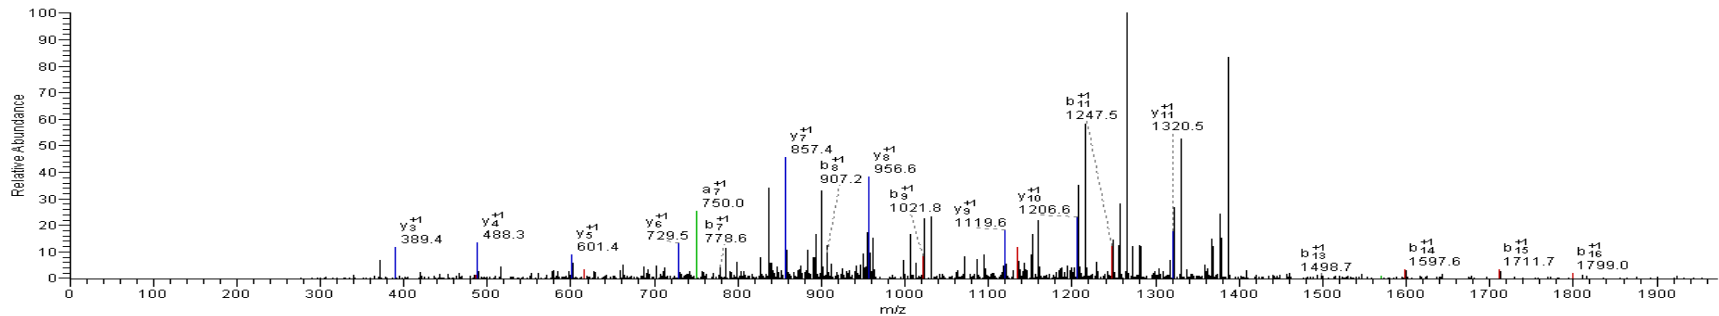

# LanB1 NP\_476618.1 Laminin B1 CG7123-PA

## R.IDVTPIFQGSVLDIR.K

|    | AA | A       | B       | Y       |    |
|----|----|---------|---------|---------|----|
| 1  | I  | 86.10   | 114.09  | -       | 16 |
| 2  | D  | 201.12  | 229.12  | 1630.88 | 15 |
| 3  | V  | 300.19  | 328.19  | 1515.85 | 14 |
| 4  | T  | 401.24  | 429.23  | 1416.78 | 13 |
| 5  | P  | 498.29  | 526.29  | 1315.74 | 12 |
| 6  | I  | 611.38  | 639.37  | 1218.68 | 11 |
| 7  | F  | 758.44  | 786.44  | 1105.60 | 10 |
| 8  | Q  | 886.50  | 914.50  | 958.53  | 9  |
| 9  | G  | 943.52  | 971.52  | 830.47  | 8  |
| 10 | S  | 1030.56 | 1058.55 | 773.45  | 7  |
| 11 | V  | 1129.63 | 1157.62 | 686.42  | 6  |
| 12 | L  | 1242.71 | 1270.70 | 587.35  | 5  |
| 13 | A  | 1313.75 | 1341.74 | 474.27  | 4  |
| 14 | D  | 1428.77 | 1456.77 | 403.23  | 3  |
| 15 | I  | 1541.86 | 1569.85 | 288.20  | 2  |
| 16 | R  | -       | -       | 175.12  | 1  |

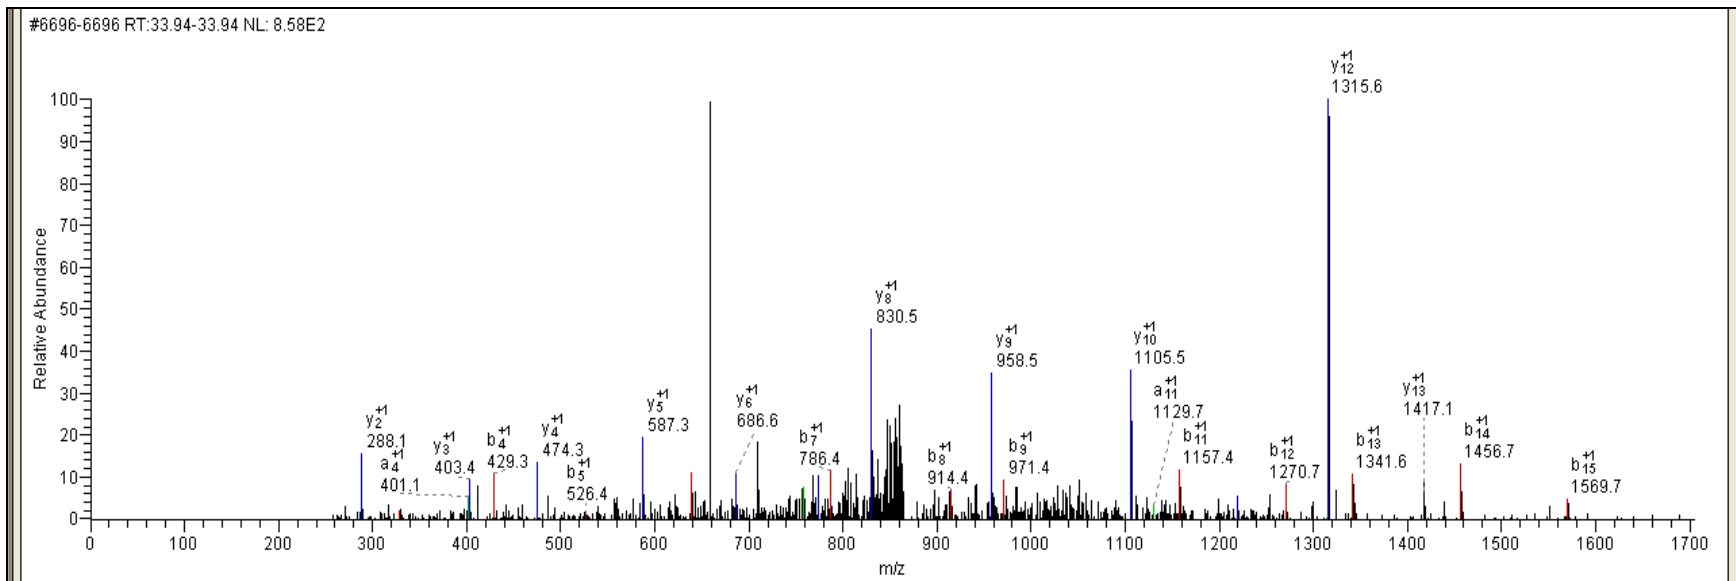

# I(2)37Cc NP\_476607.2 lethal (2) 37Cc CG10691-PB

## R.RIEAAEDIAYQLSR.S

|    | AA | A       | B       | Y       |    |
|----|----|---------|---------|---------|----|
| 1  | R  | 129.11  | 157.11  | -       | 14 |
| 2  | I  | 242.20  | 270.19  | 1478.75 | 13 |
| 3  | E  | 371.24  | 399.24  | 1365.66 | 12 |
| 4  | A  | 442.28  | 470.27  | 1236.62 | 11 |
| 5  | A  | 513.31  | 541.31  | 1165.58 | 10 |
| 6  | E  | 642.36  | 670.35  | 1094.55 | 9  |
| 7  | D  | 757.38  | 785.38  | 965.51  | 8  |
| 8  | I  | 870.47  | 898.46  | 850.48  | 7  |
| 9  | A  | 941.51  | 969.50  | 737.39  | 6  |
| 10 | Y  | 1104.57 | 1132.56 | 666.36  | 5  |
| 11 | Q  | 1232.63 | 1260.62 | 503.29  | 4  |
| 12 | L  | 1345.71 | 1373.71 | 375.24  | 3  |
| 13 | S  | 1432.74 | 1460.74 | 262.15  | 2  |
| 14 | R  | -       | -       | 175.12  | 1  |

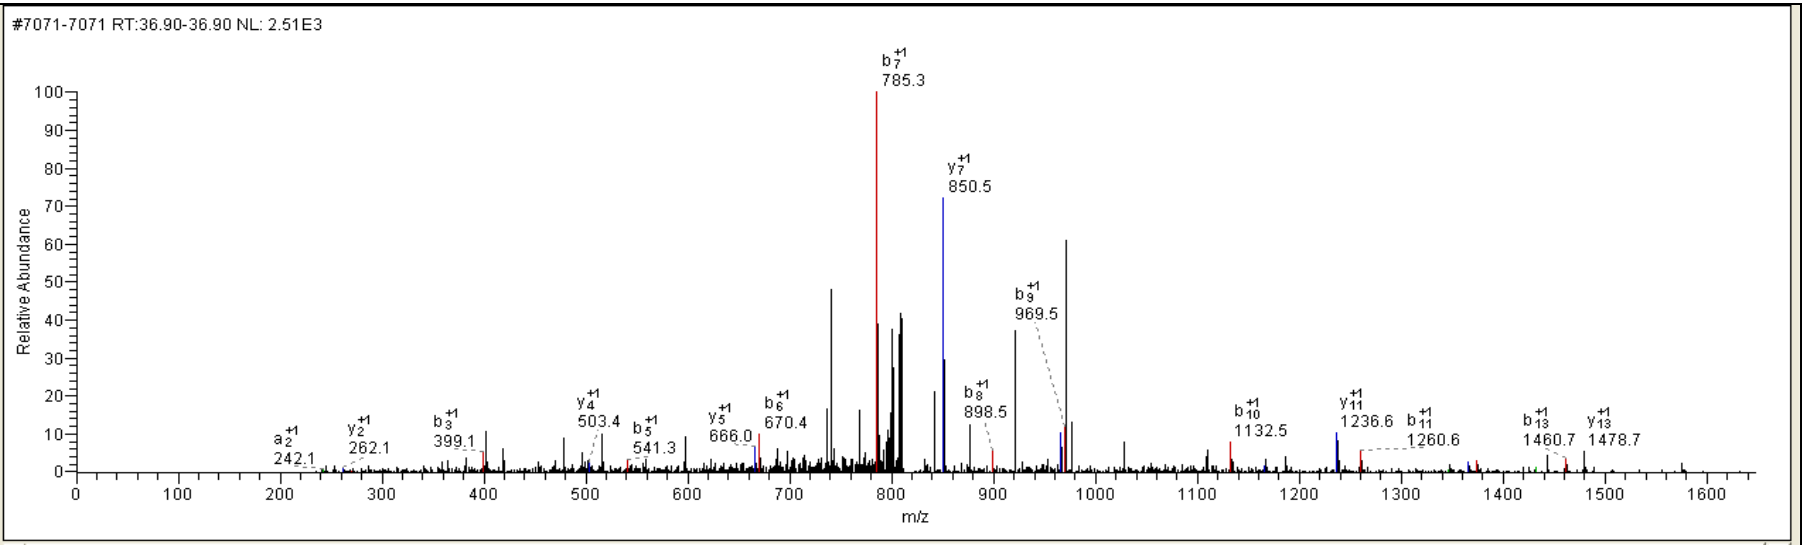

# NP\_648545.1 lethal (3) j2D3 CG6801-PA

## R.NIDDAAGAKEVHR.S

|    | AA | A       | B       | Y       |    |
|----|----|---------|---------|---------|----|
| 1  | N  | 87.06   | 115.05  | -       | 13 |
| 2  | I  | 200.14  | 228.13  | 1281.65 | 12 |
| 3  | D  | 315.17  | 343.16  | 1168.57 | 11 |
| 4  | D  | 430.19  | 458.19  | 1053.54 | 10 |
| 5  | A  | 501.23  | 529.23  | 938.52  | 9  |
| 6  | A  | 572.27  | 600.26  | 867.48  | 8  |
| 7  | G  | 629.29  | 657.28  | 796.44  | 7  |
| 8  | A  | 700.33  | 728.32  | 739.42  | 6  |
| 9  | K  | 828.42  | 856.42  | 668.38  | 5  |
| 10 | E  | 957.46  | 985.46  | 540.29  | 4  |
| 11 | V  | 1056.53 | 1084.53 | 411.25  | 3  |
| 12 | H  | 1193.59 | 1221.59 | 312.18  | 2  |
| 13 | R  | -       | -       | 175.12  | 1  |

#7452-7452 RT:33.03-33.03 NL: 9.42E2

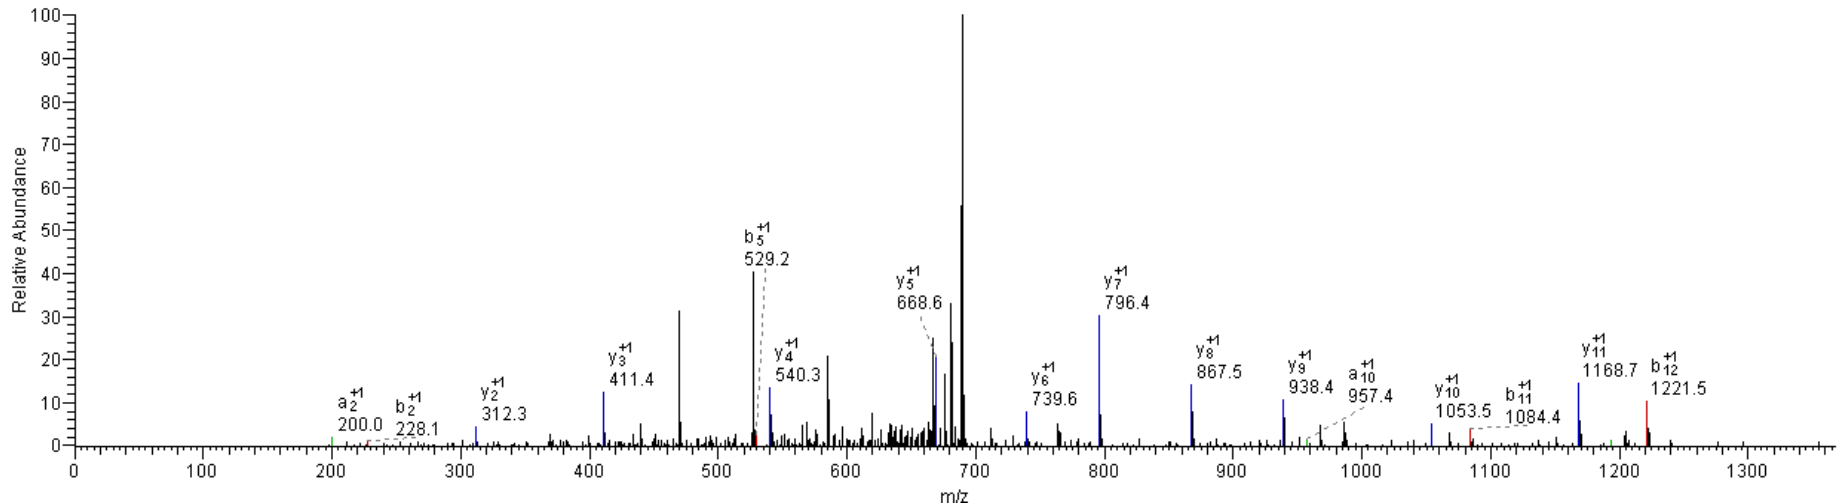

# lin19 NP\_724623.1 lin-19-like CG1877-PC

## R.LNHTNLISEVLNQLSTR.F

|    | AA | A       | B       | Y       |    |
|----|----|---------|---------|---------|----|
| 1  | L  | 86.10   | 114.09  | -       | 17 |
| 2  | N  | 200.14  | 228.13  | 1838.97 | 16 |
| 3  | H  | 337.20  | 365.19  | 1724.93 | 15 |
| 4  | T  | 438.25  | 466.24  | 1587.87 | 14 |
| 5  | N  | 552.29  | 580.28  | 1486.82 | 13 |
| 6  | L  | 665.37  | 693.37  | 1372.78 | 12 |
| 7  | I  | 778.46  | 806.45  | 1259.70 | 11 |
| 8  | S  | 865.49  | 893.48  | 1146.61 | 10 |
| 9  | E  | 994.53  | 1022.53 | 1059.58 | 9  |
| 10 | V  | 1093.60 | 1121.59 | 930.54  | 8  |
| 11 | L  | 1206.68 | 1234.68 | 831.47  | 7  |
| 12 | N  | 1320.73 | 1348.72 | 718.38  | 6  |
| 13 | Q  | 1448.79 | 1476.78 | 604.34  | 5  |
| 14 | L  | 1561.87 | 1589.86 | 476.28  | 4  |
| 15 | S  | 1648.90 | 1676.90 | 363.20  | 3  |
| 16 | T  | 1749.95 | 1777.94 | 276.17  | 2  |
| 17 | R  | -       | -       | 175.12  | 1  |

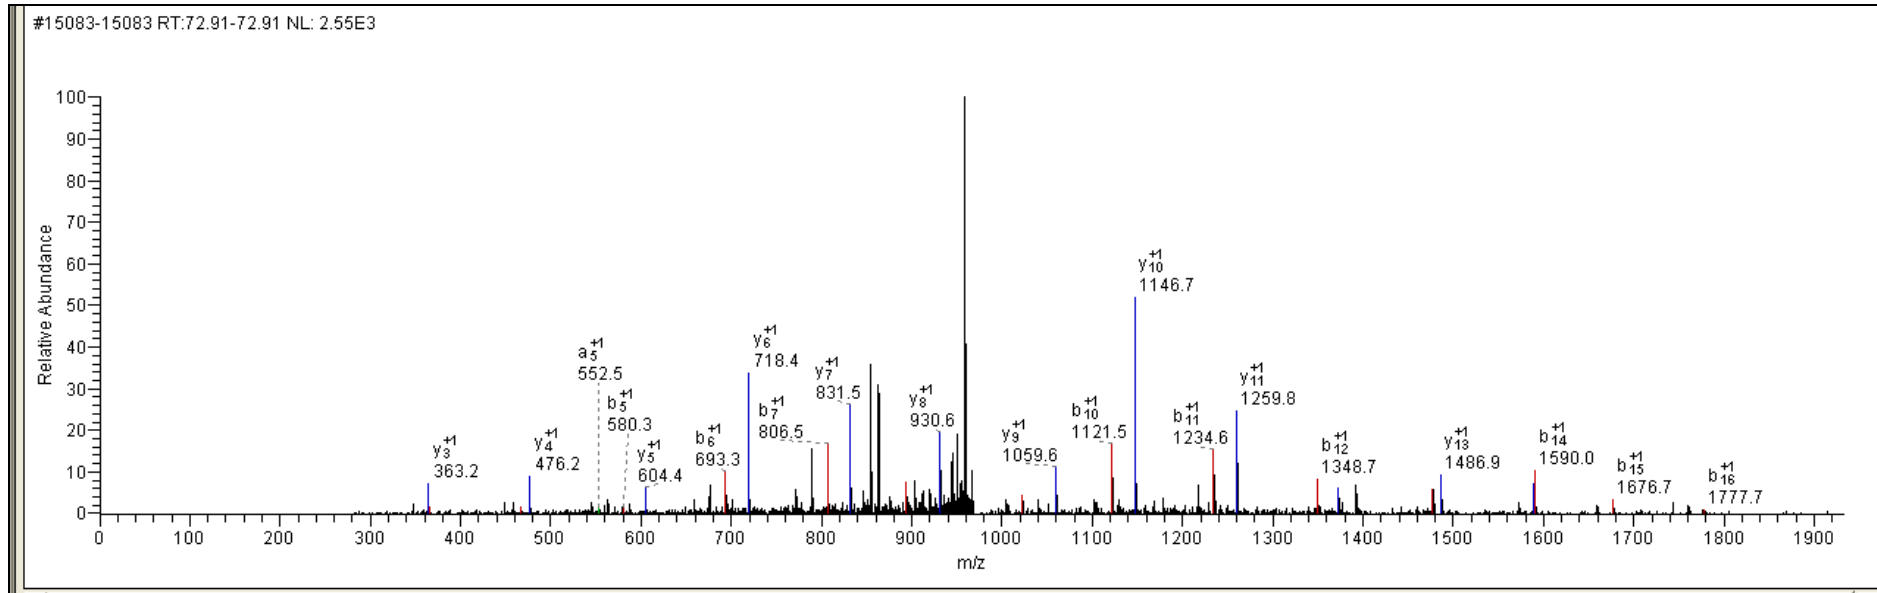

# Iola NP\_524766.2 longitudinals lacking CG12052-PG

## K.LSGAYTLEQTKR.A

|    | AA | A       | B       | Y       |    |
|----|----|---------|---------|---------|----|
| 1  | L  | 86.10   | 114.09  | -       | 12 |
| 2  | S  | 173.13  | 201.12  | 1253.65 | 11 |
| 3  | G  | 230.15  | 258.14  | 1166.62 | 10 |
| 4  | A  | 301.19  | 329.18  | 1109.59 | 9  |
| 5  | Y  | 464.25  | 492.25  | 1038.56 | 8  |
| 6  | T  | 565.30  | 593.29  | 875.49  | 7  |
| 7  | L  | 678.38  | 706.38  | 774.45  | 6  |
| 8  | E  | 807.42  | 835.42  | 661.36  | 5  |
| 9  | Q  | 935.48  | 963.48  | 532.32  | 4  |
| 10 | T  | 1036.53 | 1064.53 | 404.26  | 3  |
| 11 | K  | 1164.63 | 1192.62 | 303.21  | 2  |
| 12 | R  | -       | -       | 175.12  | 1  |

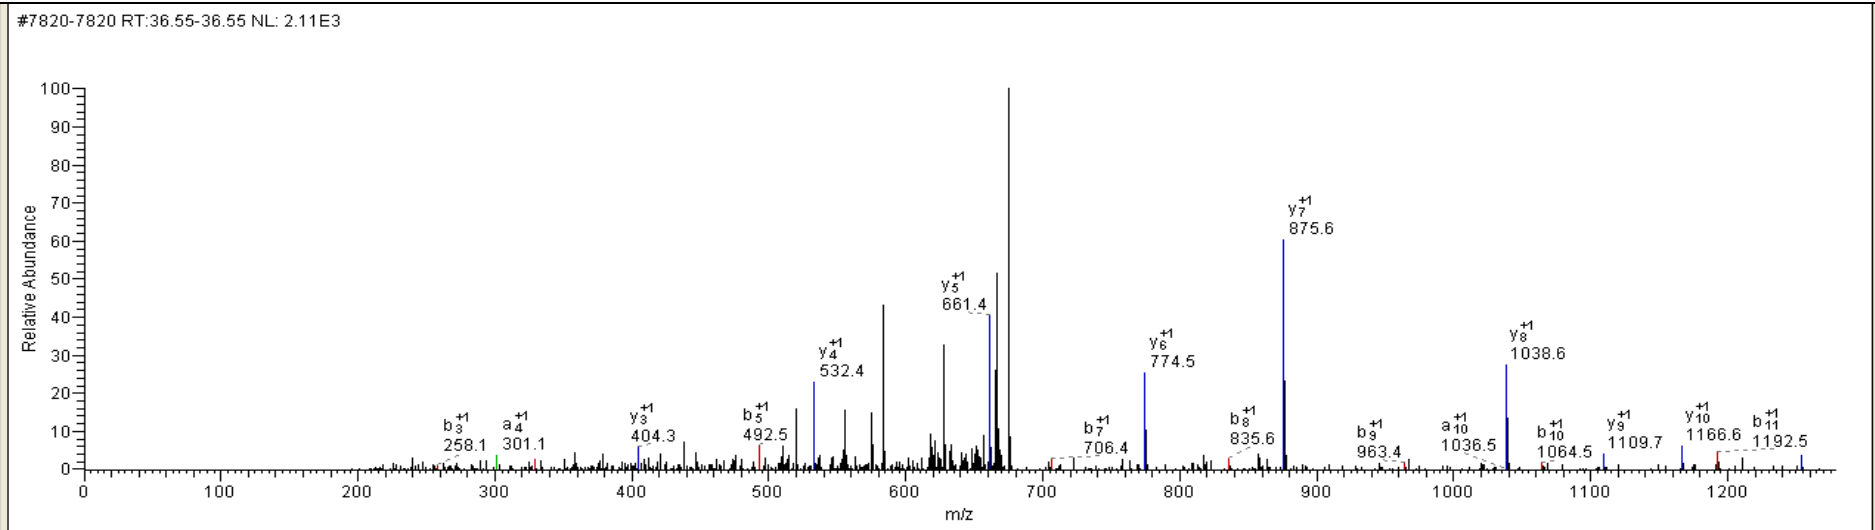



# Mapmodulin NP\_523780.1 Mapmodulin CG5784-PB

## R.ISSGLNYLTTSPK.L

|    | AA | A       | B       | Y       |    |
|----|----|---------|---------|---------|----|
| 1  | I  | 86.10   | 114.09  | -       | 13 |
| 2  | S  | 173.13  | 201.12  | 1267.65 | 12 |
| 3  | S  | 260.16  | 288.16  | 1180.62 | 11 |
| 4  | G  | 317.18  | 345.18  | 1093.59 | 10 |
| 5  | L  | 430.27  | 458.26  | 1036.57 | 9  |
| 6  | N  | 544.31  | 572.30  | 923.48  | 8  |
| 7  | Y  | 707.37  | 735.37  | 809.44  | 7  |
| 8  | L  | 820.46  | 848.45  | 646.38  | 6  |
| 9  | T  | 921.50  | 949.50  | 533.29  | 5  |
| 10 | T  | 1022.55 | 1050.55 | 432.25  | 4  |
| 11 | S  | 1109.58 | 1137.58 | 331.20  | 3  |
| 12 | P  | 1206.64 | 1234.63 | 244.17  | 2  |
| 13 | K  | -       | -       | 147.11  | 1  |

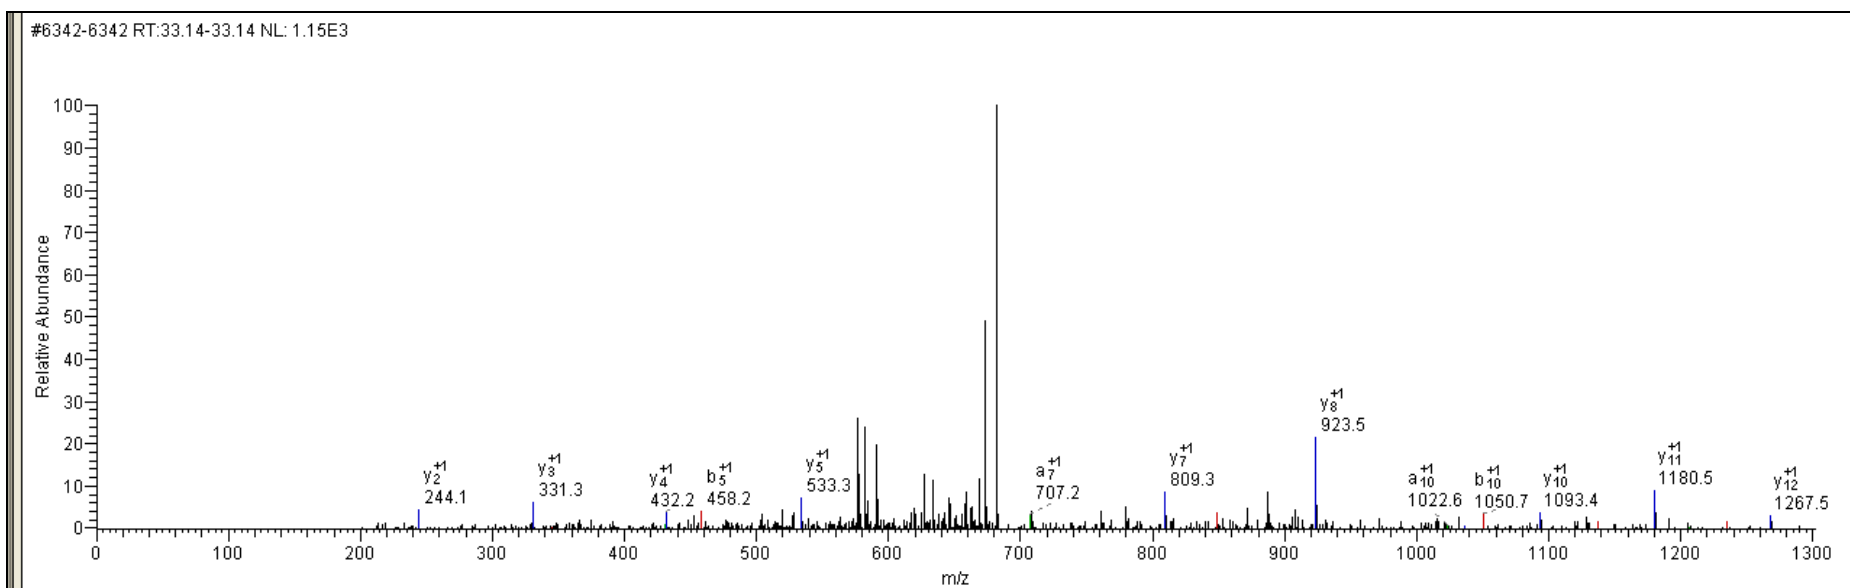

# me31B NP\_523533.2 maternal expression at 31B CG4916-PA

## K.DPQILLFSATFPLTVK.N

|    | AA | A       | B       | Y       |    |
|----|----|---------|---------|---------|----|
| 1  | D  | 88.04   | 116.03  | -       | 16 |
| 2  | P  | 185.09  | 213.09  | 1674.98 | 15 |
| 3  | Q  | 313.15  | 341.15  | 1577.93 | 14 |
| 4  | I  | 426.23  | 454.23  | 1449.87 | 13 |
| 5  | L  | 539.32  | 567.31  | 1336.79 | 12 |
| 6  | L  | 652.40  | 680.40  | 1223.70 | 11 |
| 7  | F  | 799.47  | 827.47  | 1110.62 | 10 |
| 8  | S  | 886.50  | 914.50  | 963.55  | 9  |
| 9  | A  | 957.54  | 985.54  | 876.52  | 8  |
| 10 | T  | 1058.59 | 1086.58 | 805.48  | 7  |
| 11 | F  | 1205.66 | 1233.65 | 704.43  | 6  |
| 12 | P  | 1302.71 | 1330.70 | 557.37  | 5  |
| 13 | L  | 1415.79 | 1443.79 | 460.31  | 4  |
| 14 | T  | 1516.84 | 1544.84 | 347.23  | 3  |
| 15 | V  | 1615.91 | 1643.90 | 246.18  | 2  |
| 16 | K  | -       | -       | 147.11  | 1  |

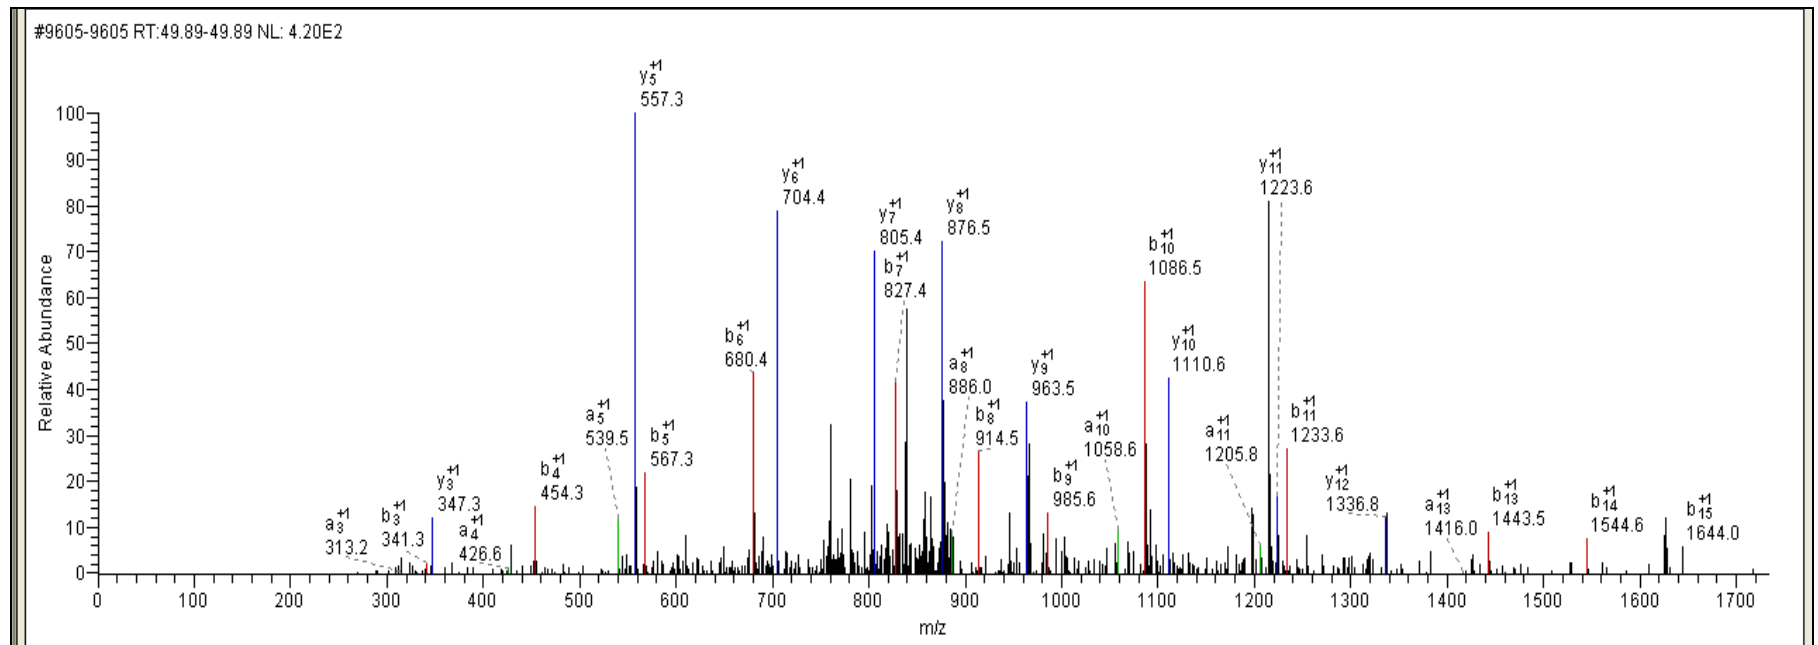

# CG42236 NP\_001033938.1 midlife-crisis CG11763-PD

## R.ESVSTTLNSAILESINFER.R

|    | AA | A       | B       | Y       |    |
|----|----|---------|---------|---------|----|
| 1  | E  | 102.05  | 130.05  | -       | 19 |
| 2  | S  | 189.09  | 217.08  | 1981.02 | 18 |
| 3  | V  | 288.16  | 316.15  | 1893.99 | 17 |
| 4  | S  | 375.19  | 403.18  | 1794.92 | 16 |
| 5  | T  | 476.24  | 504.23  | 1707.89 | 15 |
| 6  | T  | 577.28  | 605.28  | 1606.84 | 14 |
| 7  | L  | 690.37  | 718.36  | 1505.80 | 13 |
| 8  | N  | 804.41  | 832.40  | 1392.71 | 12 |
| 9  | S  | 891.44  | 919.44  | 1278.67 | 11 |
| 10 | A  | 962.48  | 990.47  | 1191.64 | 10 |
| 11 | I  | 1075.56 | 1103.56 | 1120.60 | 9  |
| 12 | L  | 1188.65 | 1216.64 | 1007.52 | 8  |
| 13 | E  | 1317.69 | 1345.68 | 894.43  | 7  |
| 14 | S  | 1404.72 | 1432.72 | 765.39  | 6  |
| 15 | L  | 1517.81 | 1545.80 | 678.36  | 5  |
| 16 | N  | 1631.85 | 1659.84 | 565.27  | 4  |
| 17 | F  | 1778.92 | 1806.91 | 451.23  | 3  |
| 18 | E  | 1907.96 | 1935.95 | 304.16  | 2  |
| 19 | R  | -       | -       | 175.12  | 1  |

#15399-15399 RT:71.16-71.16 NL: 8.13E2

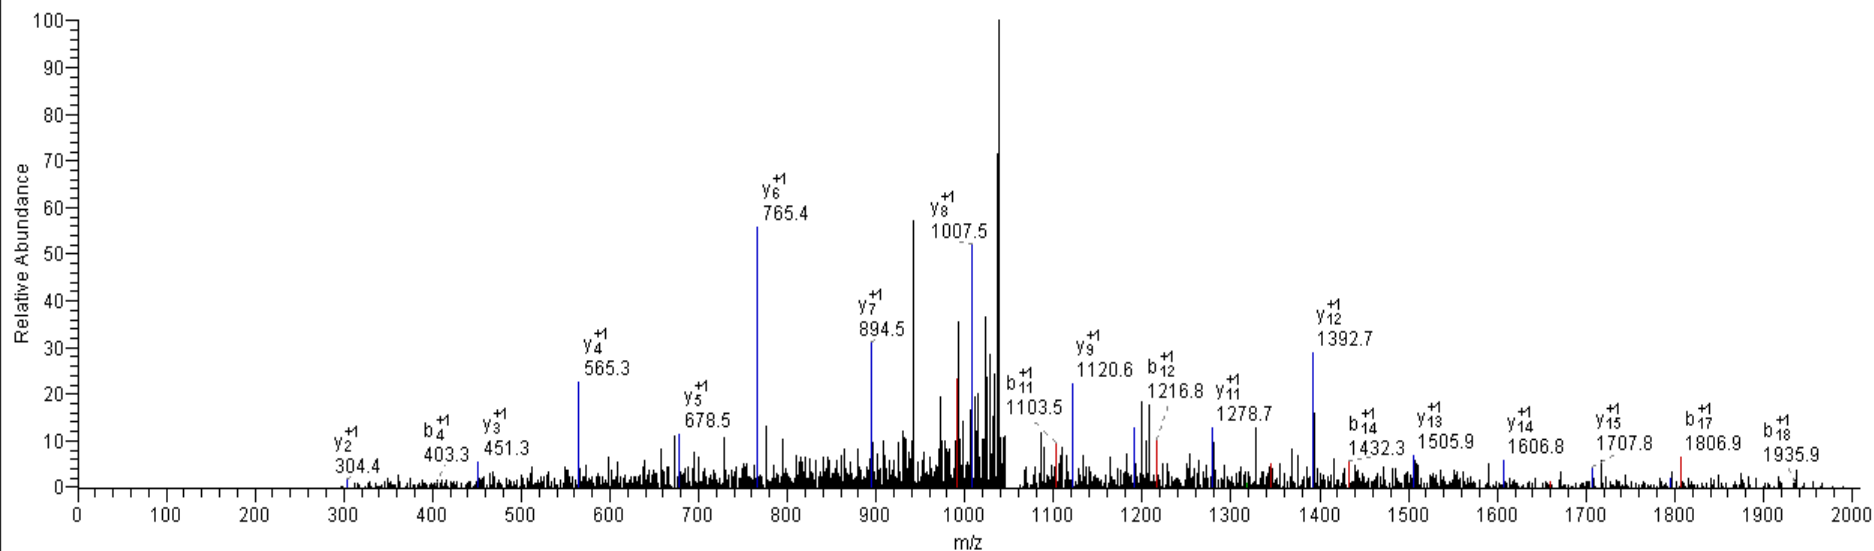

# NP\_732619.1 modifier of mdg4 CG32491-PR

## K.QDALPAFISTAESLQIK.G

|    | AA | A       | B       | Y       |    |
|----|----|---------|---------|---------|----|
| 1  | Q  | 101.07  | 129.07  | -       | 17 |
| 2  | D  | 216.10  | 244.09  | 1703.92 | 16 |
| 3  | A  | 287.13  | 315.13  | 1588.89 | 15 |
| 4  | L  | 400.22  | 428.21  | 1517.86 | 14 |
| 5  | P  | 497.27  | 525.27  | 1404.77 | 13 |
| 6  | A  | 568.31  | 596.30  | 1307.72 | 12 |
| 7  | F  | 715.38  | 743.37  | 1236.68 | 11 |
| 8  | I  | 828.46  | 856.46  | 1089.62 | 10 |
| 9  | S  | 915.49  | 943.49  | 976.53  | 9  |
| 10 | T  | 1016.54 | 1044.54 | 889.50  | 8  |
| 11 | A  | 1087.58 | 1115.57 | 788.45  | 7  |
| 12 | E  | 1216.62 | 1244.62 | 717.41  | 6  |
| 13 | S  | 1303.65 | 1331.65 | 588.37  | 5  |
| 14 | L  | 1416.74 | 1444.73 | 501.34  | 4  |
| 15 | Q  | 1544.80 | 1572.79 | 388.26  | 3  |
| 16 | I  | 1657.88 | 1685.87 | 260.20  | 2  |
| 17 | K  | -       | -       | 147.11  | 1  |

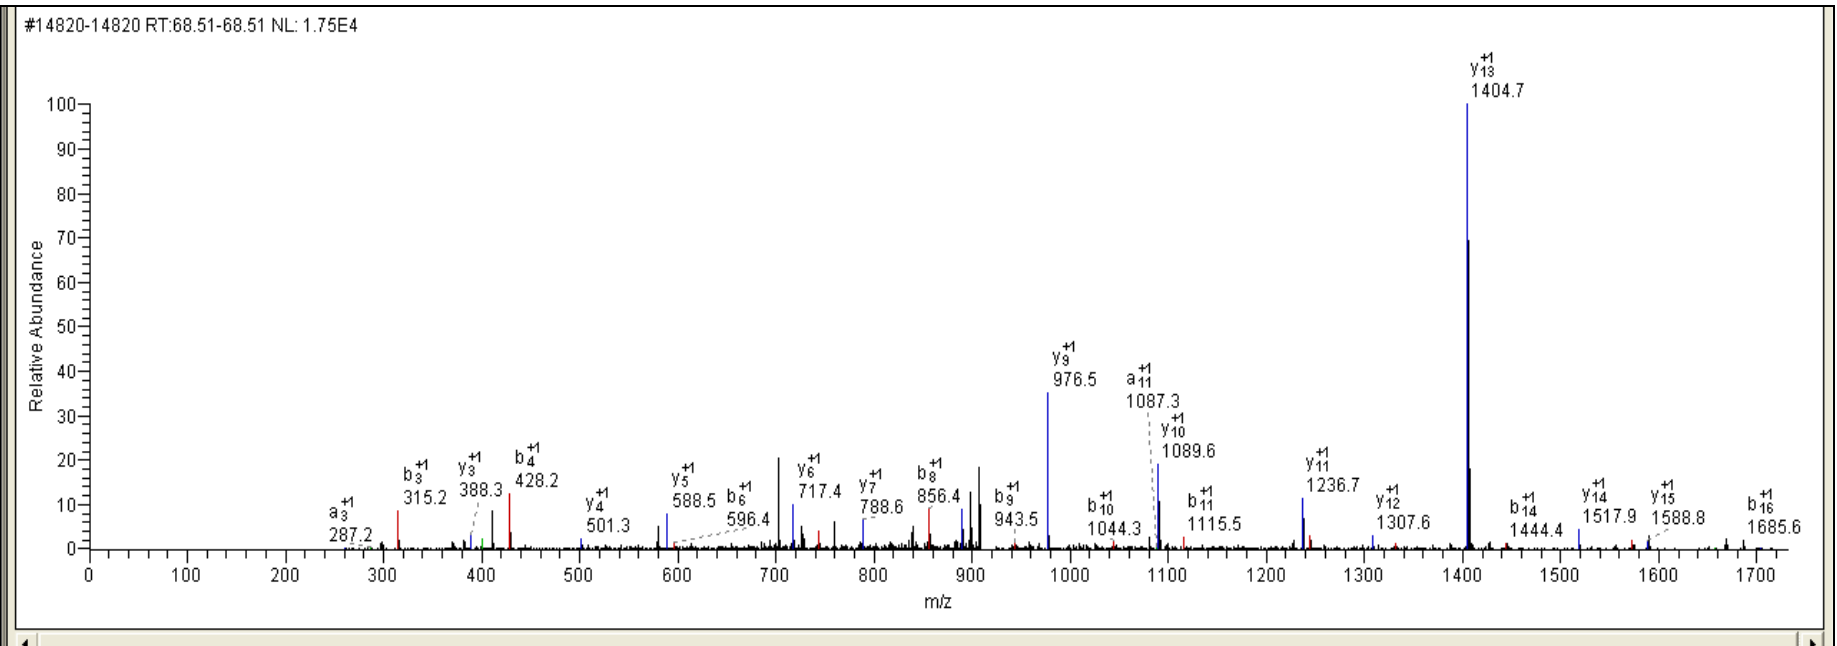

# Mlc-c NP\_511049.1 Myosin light chain cytoplasmic CG3201-PA

## R.SGDTADDFIEGLR.H

|    | AA | A       | B       | Y       |    |
|----|----|---------|---------|---------|----|
| 1  | S  | 60.04   | 88.04   | -       | 13 |
| 2  | G  | 117.07  | 145.06  | 1308.61 | 12 |
| 3  | D  | 232.09  | 260.09  | 1251.59 | 11 |
| 4  | T  | 333.14  | 361.14  | 1136.56 | 10 |
| 5  | A  | 404.18  | 432.17  | 1035.51 | 9  |
| 6  | D  | 519.20  | 547.20  | 964.47  | 8  |
| 7  | D  | 634.23  | 662.23  | 849.45  | 7  |
| 8  | F  | 781.30  | 809.29  | 734.42  | 6  |
| 9  | I  | 894.38  | 922.38  | 587.35  | 5  |
| 10 | E  | 1023.43 | 1051.42 | 474.27  | 4  |
| 11 | G  | 1080.45 | 1108.44 | 345.22  | 3  |
| 12 | L  | 1193.53 | 1221.53 | 288.20  | 2  |
| 13 | R  | -       | -       | 175.12  | 1  |

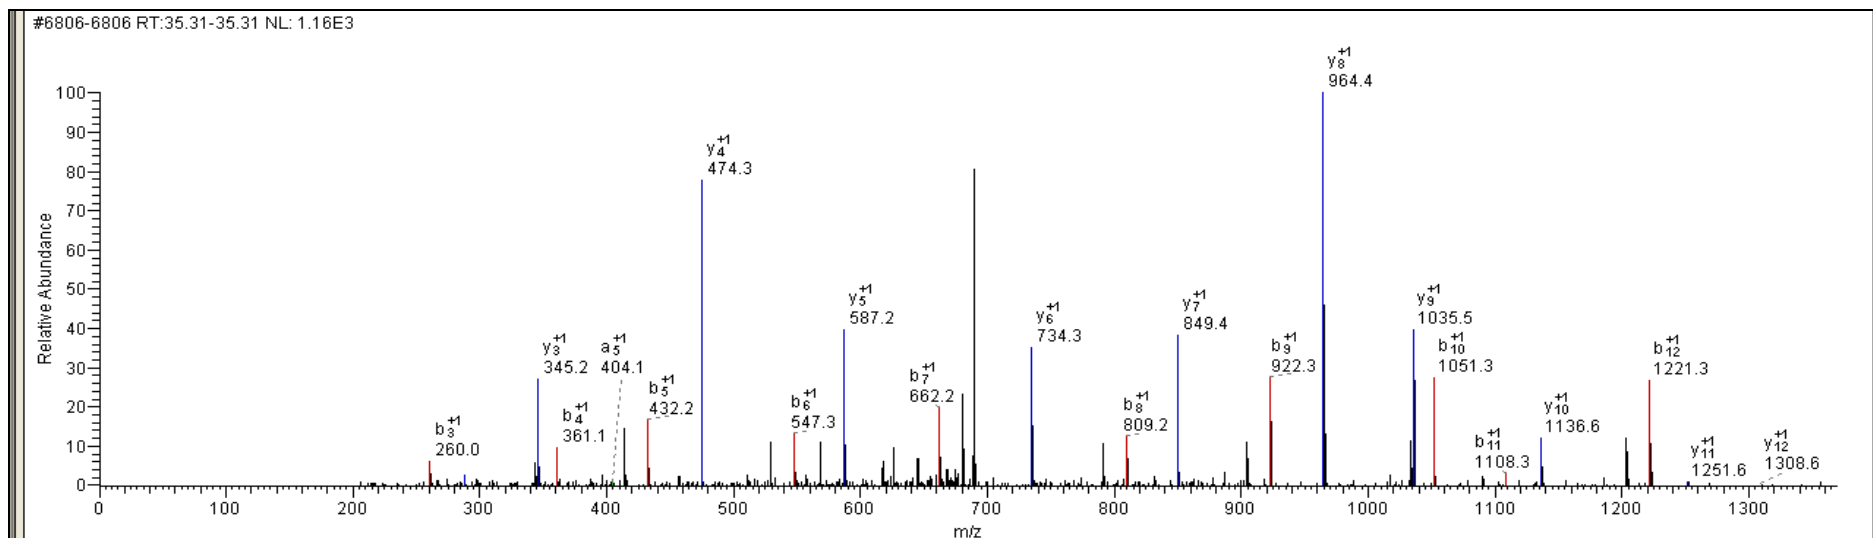

# Nipped-A NP\_001097192.1 Nipped-A CG33554-PD

## K.NEINEALEVIESTNLK.Y

|    | AA | A       | B       | Y       |    |
|----|----|---------|---------|---------|----|
| 1  | N  | 87.06   | 115.05  | -       | 16 |
| 2  | E  | 216.10  | 244.09  | 1701.89 | 15 |
| 3  | I  | 329.18  | 357.18  | 1572.85 | 14 |
| 4  | N  | 443.22  | 471.22  | 1459.76 | 13 |
| 5  | E  | 572.27  | 600.26  | 1345.72 | 12 |
| 6  | A  | 643.30  | 671.30  | 1216.68 | 11 |
| 7  | L  | 756.39  | 784.38  | 1145.64 | 10 |
| 8  | E  | 885.43  | 913.43  | 1032.56 | 9  |
| 9  | V  | 984.50  | 1012.49 | 903.51  | 8  |
| 10 | I  | 1097.58 | 1125.58 | 804.45  | 7  |
| 11 | E  | 1226.63 | 1254.62 | 691.36  | 6  |
| 12 | S  | 1313.66 | 1341.65 | 562.32  | 5  |
| 13 | T  | 1414.71 | 1442.70 | 475.29  | 4  |
| 14 | N  | 1528.75 | 1556.74 | 374.24  | 3  |
| 15 | L  | 1641.83 | 1669.83 | 260.20  | 2  |
| 16 | K  | -       | -       | 147.11  | 1  |

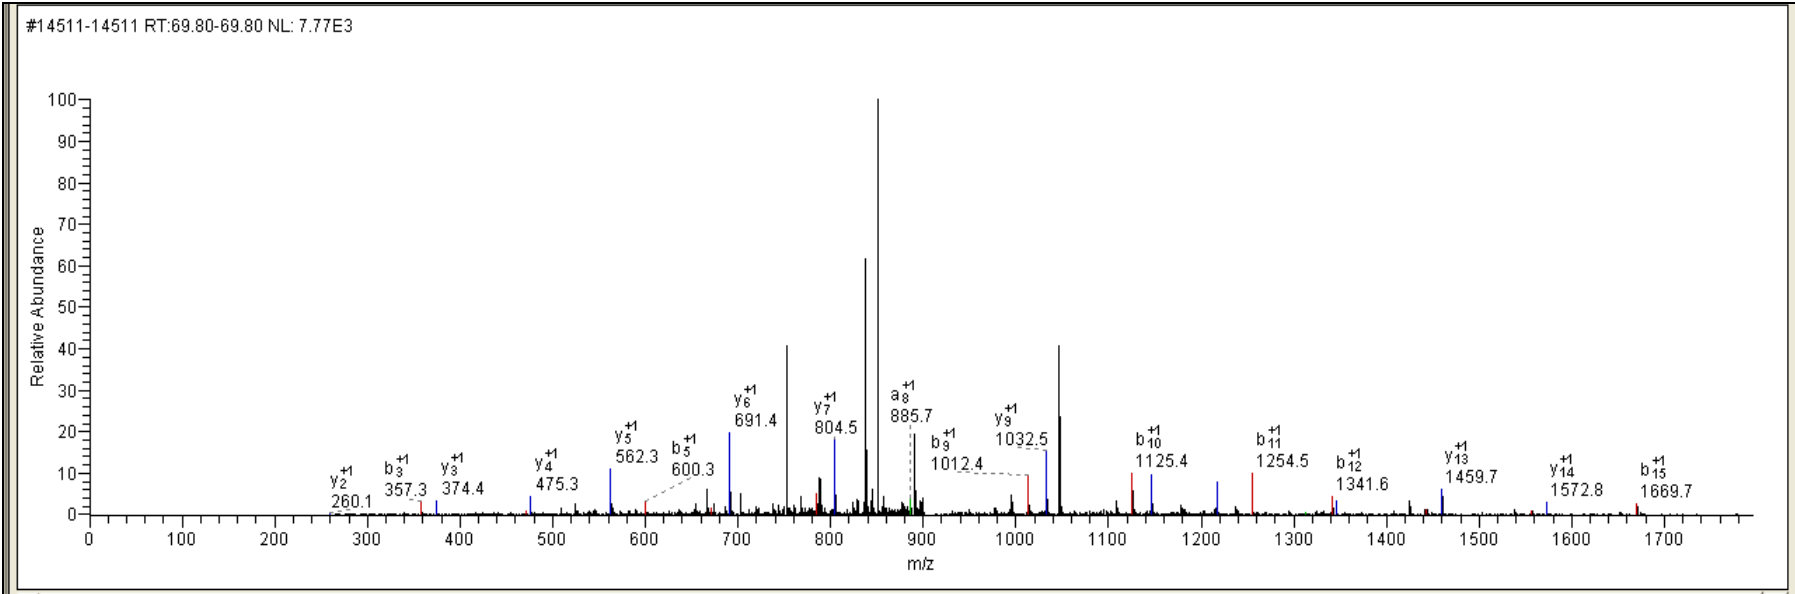

# Nnp-1 NP\_651976.1 Nnp-1 CG12396-PA

## R.GMTMHYLDVFFFEELAK.A

|    | AA | A       | B       | Y       |    |
|----|----|---------|---------|---------|----|
| 1  | G  | 30.03   | 58.03   | -       | 16 |
| 2  | M* | 177.07  | 205.06  | 1905.88 | 15 |
| 3  | T  | 278.12  | 306.11  | 1758.84 | 14 |
| 4  | M* | 425.15  | 453.15  | 1657.79 | 13 |
| 5  | H  | 562.21  | 590.21  | 1510.76 | 12 |
| 6  | Y  | 725.27  | 753.27  | 1373.70 | 11 |
| 7  | L  | 838.36  | 866.35  | 1210.64 | 10 |
| 8  | D  | 953.39  | 981.38  | 1097.55 | 9  |
| 9  | V  | 1052.45 | 1080.45 | 982.52  | 8  |
| 10 | F  | 1199.52 | 1227.52 | 883.46  | 7  |
| 11 | F  | 1346.59 | 1374.59 | 736.39  | 6  |
| 12 | E  | 1475.63 | 1503.63 | 589.32  | 5  |
| 13 | E  | 1604.68 | 1632.67 | 460.28  | 4  |
| 14 | L  | 1717.76 | 1745.75 | 331.23  | 3  |
| 15 | A  | 1788.80 | 1816.79 | 218.15  | 2  |
| 16 | K  | -       | -       | 147.11  | 1  |

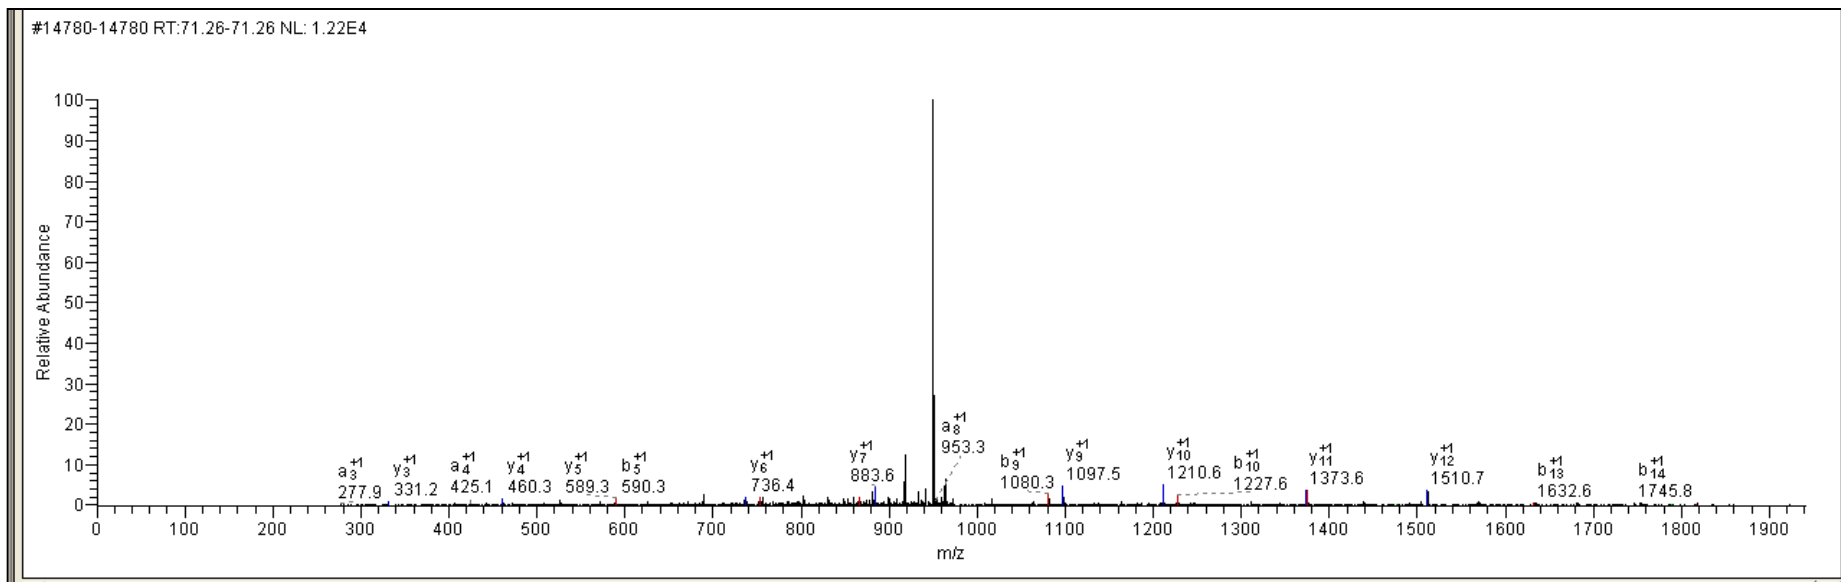

# Nlp NP\_524557.1 Nucleoplasmin CG7917-PA

R.AVNPDVEFYESKVTFK.L

|    | AA | A       | B       | Y       |    |
|----|----|---------|---------|---------|----|
| 1  | A  | 44.05   | 72.04   | -       | 16 |
| 2  | V  | 143.12  | 171.11  | 1801.90 | 15 |
| 3  | N  | 257.16  | 285.16  | 1702.83 | 14 |
| 4  | P  | 354.21  | 382.21  | 1588.79 | 13 |
| 5  | D  | 469.24  | 497.24  | 1491.74 | 12 |
| 6  | V  | 568.31  | 596.30  | 1376.71 | 11 |
| 7  | E  | 697.35  | 725.35  | 1277.64 | 10 |
| 8  | F  | 844.42  | 872.41  | 1148.60 | 9  |
| 9  | Y  | 1007.48 | 1035.48 | 1001.53 | 8  |
| 10 | E  | 1136.53 | 1164.52 | 838.47  | 7  |
| 11 | S  | 1223.56 | 1251.55 | 709.42  | 6  |
| 12 | K  | 1351.65 | 1379.65 | 622.39  | 5  |
| 13 | V  | 1450.72 | 1478.72 | 494.30  | 4  |
| 14 | T  | 1551.77 | 1579.76 | 395.23  | 3  |
| 15 | F  | 1698.84 | 1726.83 | 294.18  | 2  |
| 16 | K  | -       | -       | 147.11  | 1  |

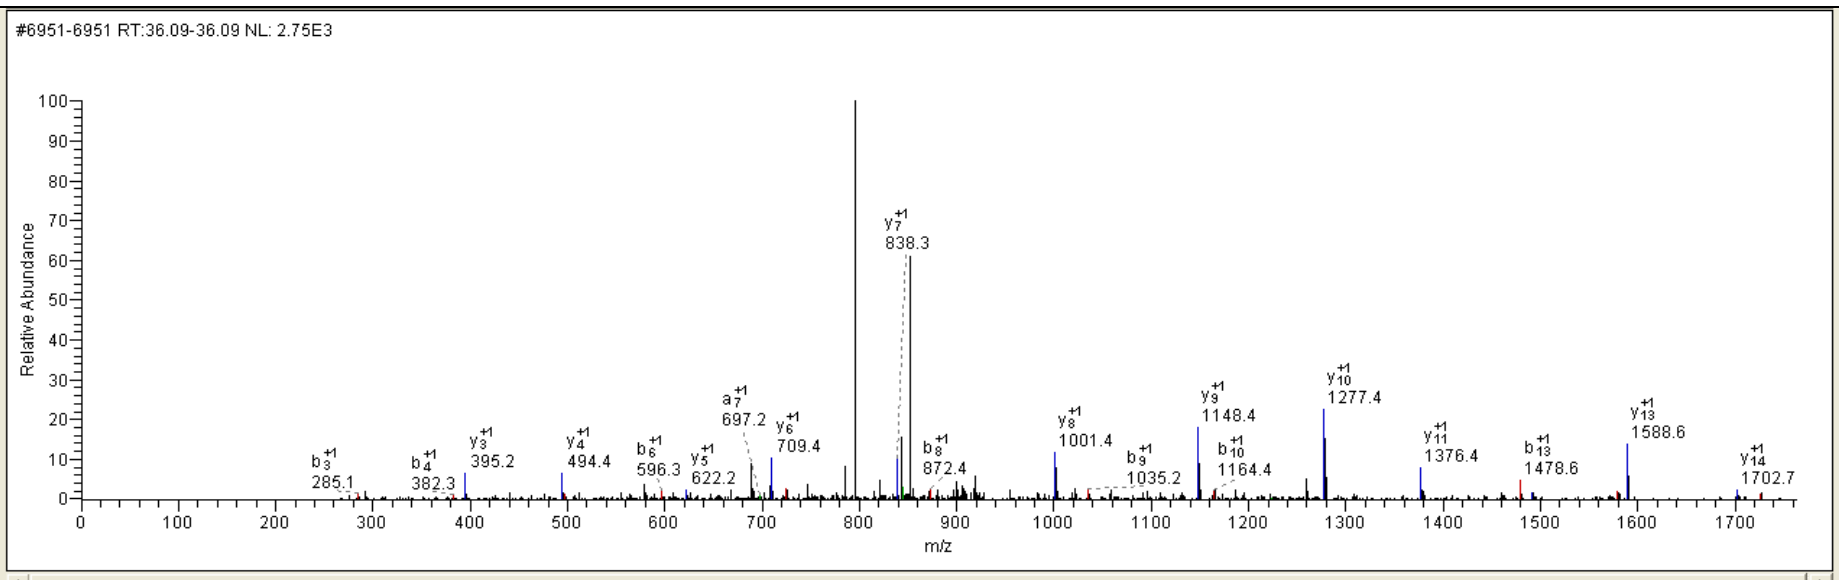



# Nurf-38 NP\_523849.3

## Nucleosome remodeling factor - 38kD CG4634-PA

### K.VNDIADVDQYFPGLLR.A

|    | AA | A       | B       | Y       |    |
|----|----|---------|---------|---------|----|
| 1  | V  | 72.08   | 100.08  | -       | 16 |
| 2  | N  | 186.12  | 214.12  | 1735.86 | 15 |
| 3  | D  | 301.15  | 329.15  | 1621.82 | 14 |
| 4  | I  | 414.23  | 442.23  | 1506.80 | 13 |
| 5  | A  | 485.27  | 513.27  | 1393.71 | 12 |
| 6  | D  | 600.30  | 628.29  | 1322.67 | 11 |
| 7  | V  | 699.37  | 727.36  | 1207.65 | 10 |
| 8  | D  | 814.39  | 842.39  | 1108.58 | 9  |
| 9  | Q  | 942.45  | 970.45  | 993.55  | 8  |
| 10 | Y  | 1105.52 | 1133.51 | 865.49  | 7  |
| 11 | F  | 1252.58 | 1280.58 | 702.43  | 6  |
| 12 | P  | 1349.64 | 1377.63 | 555.36  | 5  |
| 13 | G  | 1406.66 | 1434.65 | 458.31  | 4  |
| 14 | L  | 1519.74 | 1547.74 | 401.29  | 3  |
| 15 | L  | 1632.83 | 1660.82 | 288.20  | 2  |
| 16 | R  | -       | -       | 175.12  | 1  |

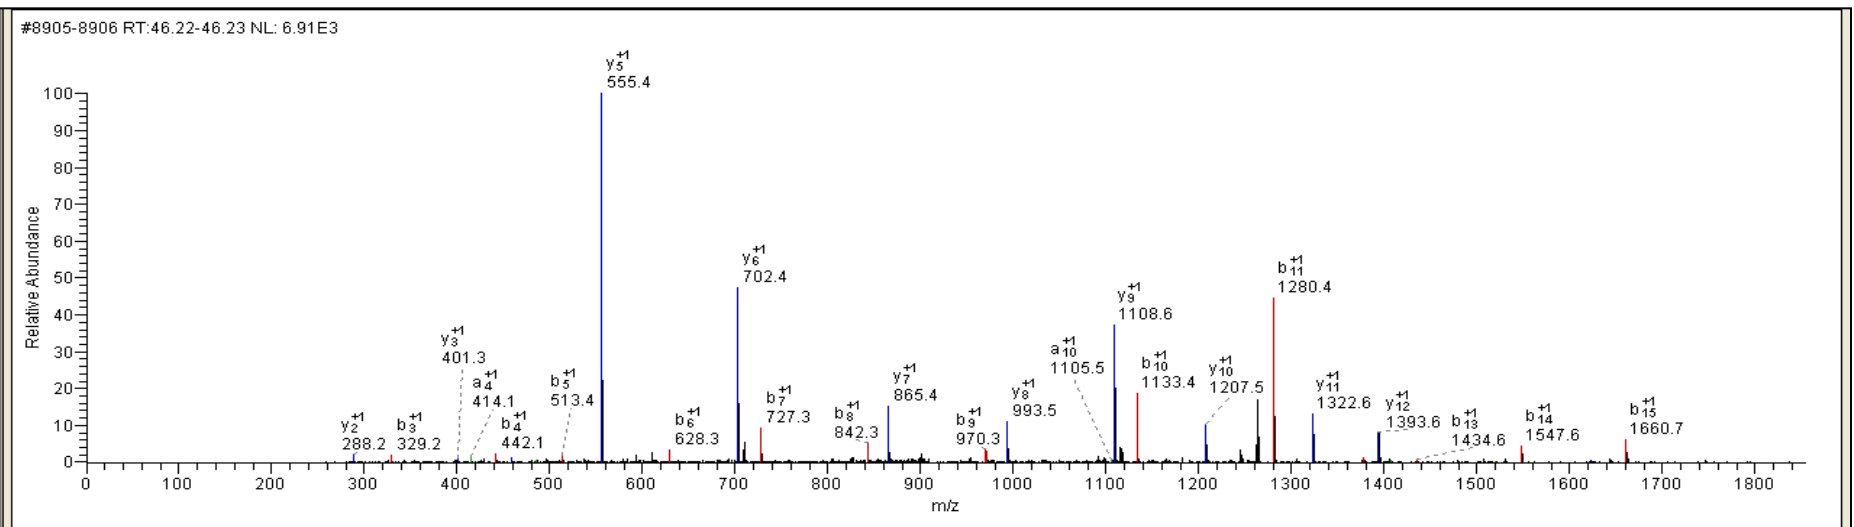

# Nup153 NP\_001097002.1 Nup153 CG4453-PB

## R.ILNLLESYSTPLIDAK.R

|    | AA | A       | B       | Y       |    |
|----|----|---------|---------|---------|----|
| 1  | I  | 86.10   | 114.09  | -       | 16 |
| 2  | L  | 199.18  | 227.18  | 1676.91 | 15 |
| 3  | N  | 313.22  | 341.22  | 1563.83 | 14 |
| 4  | L  | 426.31  | 454.30  | 1449.78 | 13 |
| 5  | L  | 539.39  | 567.39  | 1336.70 | 12 |
| 6  | E  | 668.43  | 696.43  | 1223.62 | 11 |
| 7  | S  | 755.47  | 783.46  | 1094.57 | 10 |
| 8  | Y  | 918.53  | 946.52  | 1007.54 | 9  |
| 9  | S  | 1005.56 | 1033.56 | 844.48  | 8  |
| 10 | T  | 1106.61 | 1134.60 | 757.45  | 7  |
| 11 | P  | 1203.66 | 1231.66 | 656.40  | 6  |
| 12 | L  | 1316.75 | 1344.74 | 559.34  | 5  |
| 13 | I  | 1429.83 | 1457.83 | 446.26  | 4  |
| 14 | D  | 1544.86 | 1572.85 | 333.18  | 3  |
| 15 | A  | 1615.89 | 1643.89 | 218.15  | 2  |
| 16 | K  | -       | -       | 147.11  | 1  |

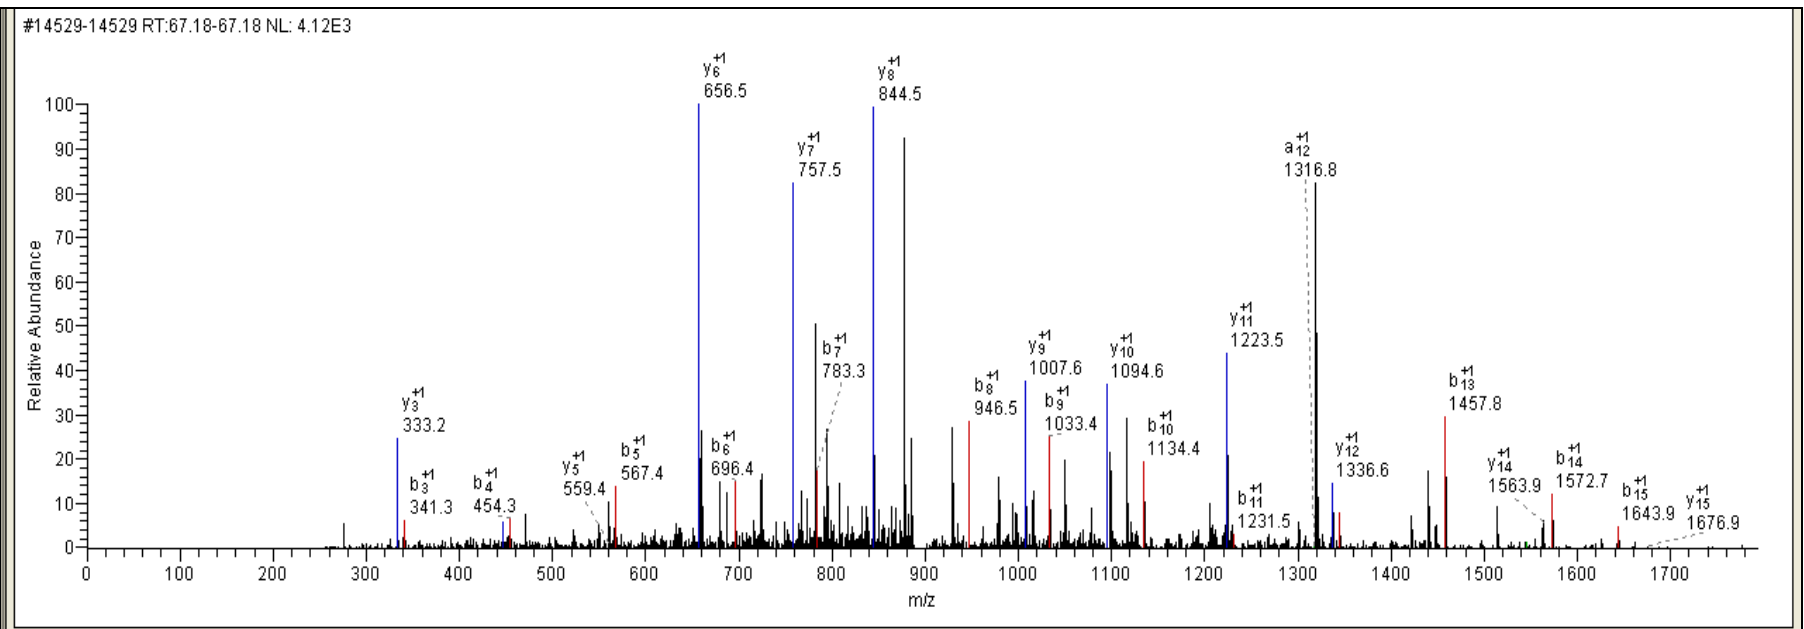

# Oscp NP\_524358.2

## Oligomycin sensitivity-conferring protein CG4307-PA

### K.LSQLDQVEKDLTALQATIR.S

|    | AA | A       | B       | Y       |    |
|----|----|---------|---------|---------|----|
| 1  | L  | 86.10   | 114.09  | -       | 19 |
| 2  | S  | 173.13  | 201.12  | 2029.09 | 18 |
| 3  | Q  | 301.19  | 329.18  | 1942.06 | 17 |
| 4  | L  | 414.27  | 442.27  | 1814.00 | 16 |
| 5  | D  | 529.30  | 557.29  | 1700.92 | 15 |
| 6  | Q  | 657.36  | 685.35  | 1585.89 | 14 |
| 7  | V  | 756.43  | 784.42  | 1457.83 | 13 |
| 8  | E  | 885.47  | 913.46  | 1358.76 | 12 |
| 9  | K  | 1013.56 | 1041.56 | 1229.72 | 11 |
| 10 | D  | 1128.59 | 1156.58 | 1101.63 | 10 |
| 11 | L  | 1241.67 | 1269.67 | 986.60  | 9  |
| 12 | T  | 1342.72 | 1370.72 | 873.52  | 8  |
| 13 | A  | 1413.76 | 1441.75 | 772.47  | 7  |
| 14 | L  | 1526.84 | 1554.84 | 701.43  | 6  |
| 15 | Q  | 1654.90 | 1682.90 | 588.35  | 5  |
| 16 | A  | 1725.94 | 1753.93 | 460.29  | 4  |
| 17 | T  | 1826.99 | 1854.98 | 389.25  | 3  |
| 18 | I  | 1940.07 | 1968.06 | 288.20  | 2  |
| 19 | R  | -       | -       | 175.12  | 1  |

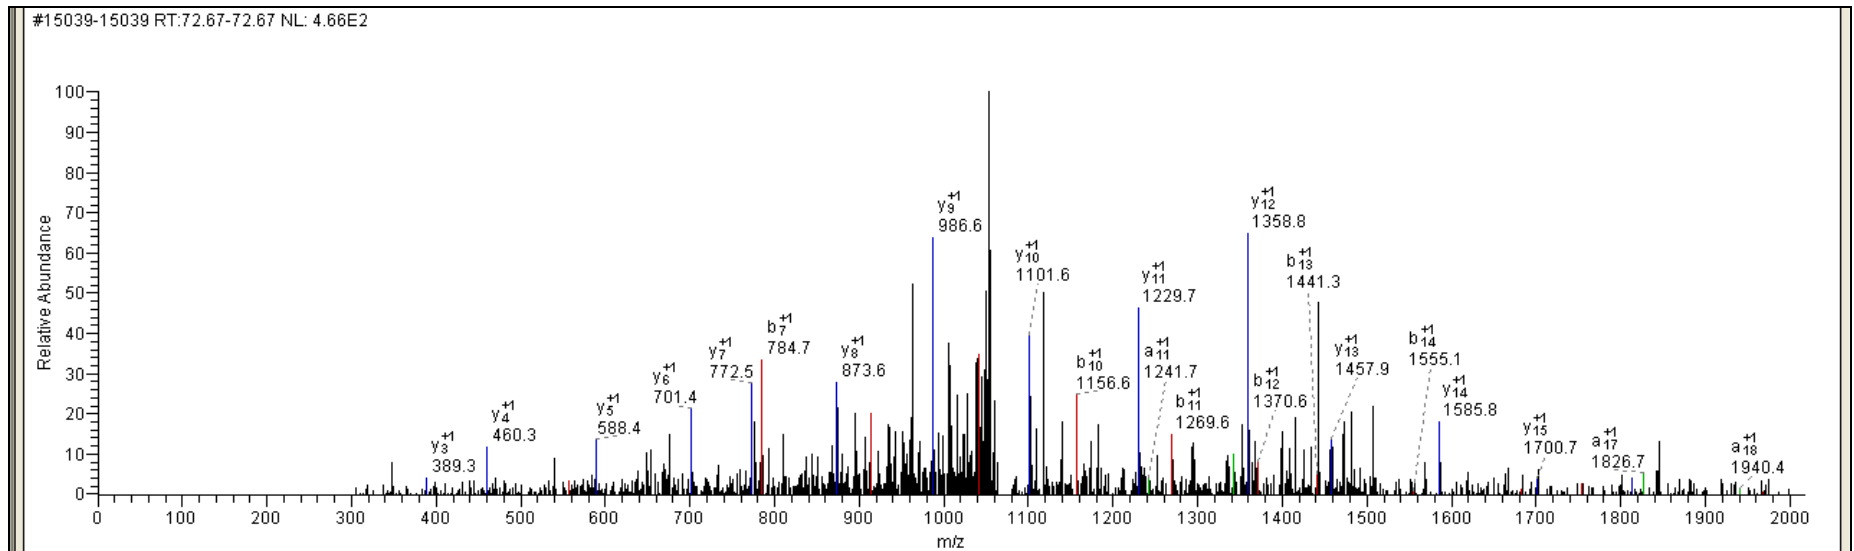

# osa NP\_996228.1 osa CG7467-PC

## R.EFSVNLLHYLAAADSAMAR.T

|    | AA | A       | B       | Y       |    |
|----|----|---------|---------|---------|----|
| 1  | E  | 102.05  | 130.05  | -       | 19 |
| 2  | F  | 249.12  | 277.12  | 1965.99 | 18 |
| 3  | S  | 336.16  | 364.15  | 1818.92 | 17 |
| 4  | V  | 435.22  | 463.22  | 1731.88 | 16 |
| 5  | N  | 549.27  | 577.26  | 1632.82 | 15 |
| 6  | L  | 662.35  | 690.35  | 1518.77 | 14 |
| 7  | L  | 775.43  | 803.43  | 1405.69 | 13 |
| 8  | H  | 912.49  | 940.49  | 1292.61 | 12 |
| 9  | Y  | 1075.56 | 1103.55 | 1155.55 | 11 |
| 10 | L  | 1188.64 | 1216.64 | 992.48  | 10 |
| 11 | A  | 1259.68 | 1287.67 | 879.40  | 9  |
| 12 | A  | 1330.72 | 1358.71 | 808.36  | 8  |
| 13 | A  | 1401.75 | 1429.75 | 737.32  | 7  |
| 14 | D  | 1516.78 | 1544.77 | 666.29  | 6  |
| 15 | S  | 1603.81 | 1631.81 | 551.26  | 5  |
| 16 | A  | 1674.85 | 1702.84 | 464.23  | 4  |
| 17 | M* | 1821.88 | 1849.88 | 393.19  | 3  |
| 18 | A  | 1892.92 | 1920.92 | 246.16  | 2  |
| 19 | R  | -       | -       | 175.12  | 1  |

#14396-14396 RT:69.16-69.16 NL: 1.03E3

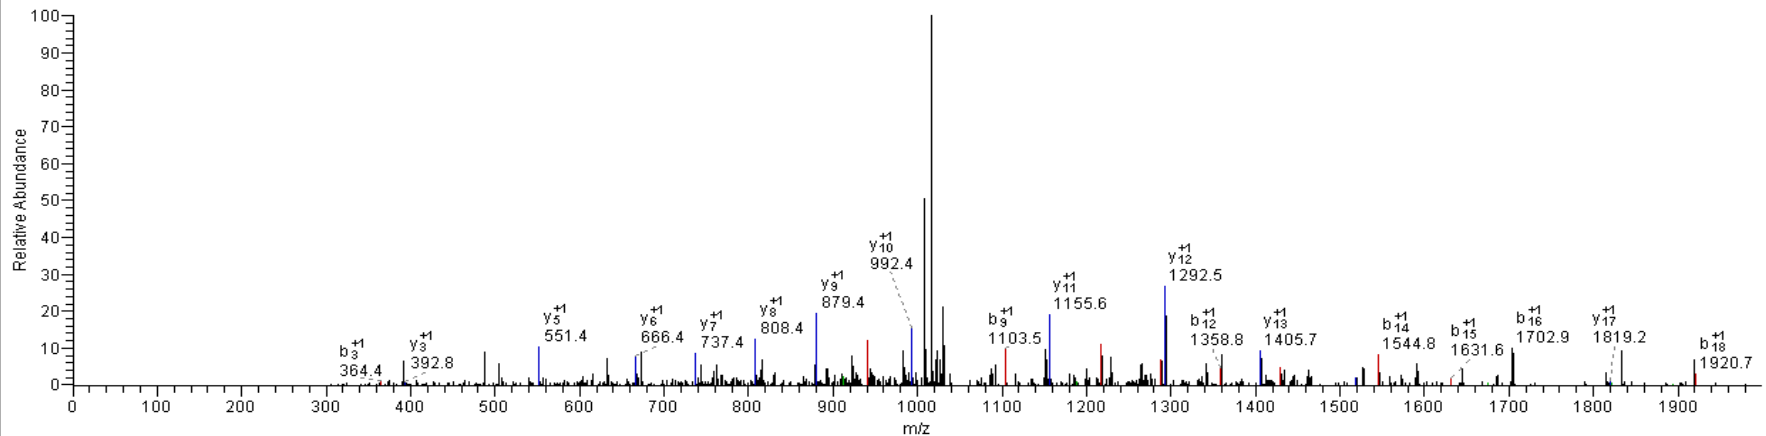

# Osi15 NP\_649636.1 Osiris 15 CG1157-PA

## R.NGQAGAADLAYNHYGLAQPF

|    | AA | A       | B       | Y       |    |
|----|----|---------|---------|---------|----|
| 1  | N  | 87.06   | 115.05  | -       | 20 |
| 2  | G  | 144.08  | 172.07  | 1963.93 | 19 |
| 3  | Q  | 272.14  | 300.13  | 1906.91 | 18 |
| 4  | A  | 343.17  | 371.17  | 1778.85 | 17 |
| 5  | G  | 400.19  | 428.19  | 1707.81 | 16 |
| 6  | A  | 471.23  | 499.23  | 1650.79 | 15 |
| 7  | A  | 542.27  | 570.26  | 1579.75 | 14 |
| 8  | D  | 657.30  | 685.29  | 1508.72 | 13 |
| 9  | L  | 770.38  | 798.37  | 1393.69 | 12 |
| 10 | A  | 841.42  | 869.41  | 1280.61 | 11 |
| 11 | Y  | 1004.48 | 1032.47 | 1209.57 | 10 |
| 12 | N  | 1118.52 | 1146.52 | 1046.51 | 9  |
| 13 | H  | 1255.58 | 1283.58 | 932.46  | 8  |
| 14 | Y  | 1418.64 | 1446.64 | 795.40  | 7  |
| 15 | G  | 1475.67 | 1503.66 | 632.34  | 6  |
| 16 | L  | 1588.75 | 1616.75 | 575.32  | 5  |
| 17 | A  | 1659.79 | 1687.78 | 462.23  | 4  |
| 18 | Q  | 1787.85 | 1815.84 | 391.20  | 3  |
| 19 | P  | 1884.90 | 1912.89 | 263.14  | 2  |
| 20 | F  | -       | -       | 166.09  | 1  |

#7190-7190 RT:37.34-37.34 NL: 1.18E3

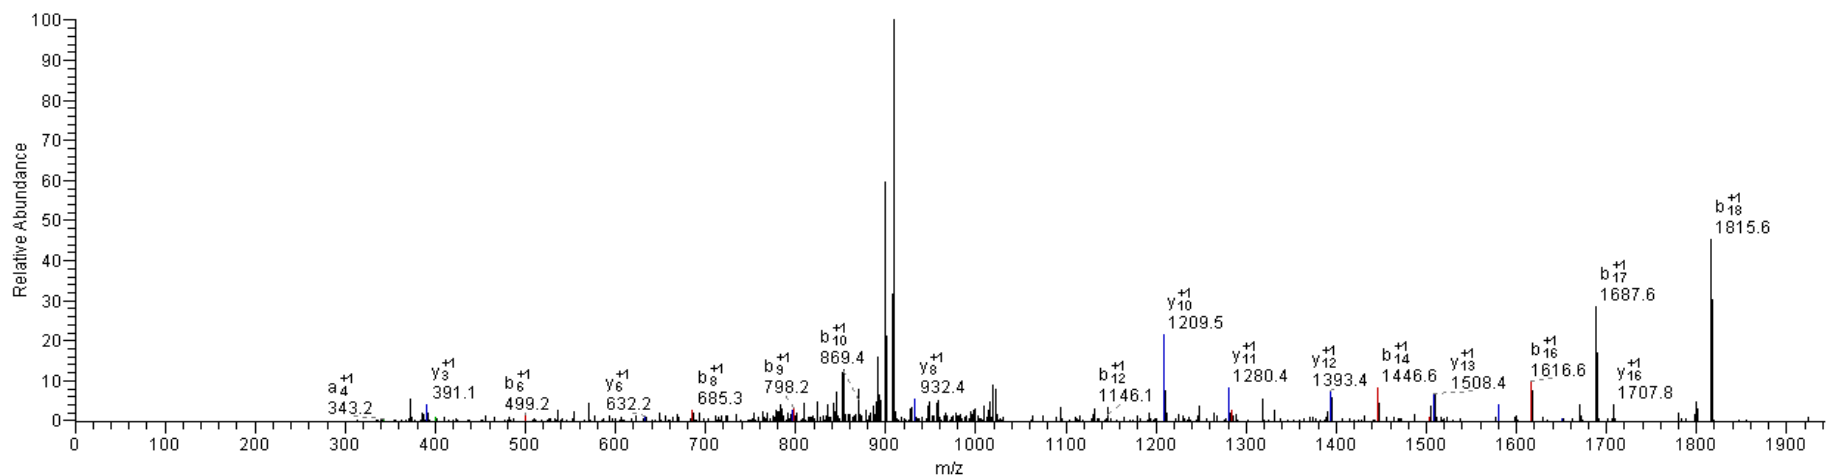

# Osi6 NP\_649625.2 Osiris 6 CG1151-PA

R.IGGSGGGGGLLGGLGGLFGGK.N

|    | AA | A       | B       | Y       |    |
|----|----|---------|---------|---------|----|
| 1  | I  | 86.10   | 114.09  | -       | 21 |
| 2  | G  | 143.12  | 171.11  | 1574.83 | 20 |
| 3  | G  | 200.14  | 228.13  | 1517.81 | 19 |
| 4  | S  | 287.17  | 315.17  | 1460.79 | 18 |
| 5  | G  | 344.19  | 372.19  | 1373.75 | 17 |
| 6  | G  | 401.21  | 429.21  | 1316.73 | 16 |
| 7  | G  | 458.24  | 486.23  | 1259.71 | 15 |
| 8  | G  | 515.26  | 543.25  | 1202.69 | 14 |
| 9  | G  | 572.28  | 600.27  | 1145.67 | 13 |
| 10 | L  | 685.36  | 713.36  | 1088.65 | 12 |
| 11 | L  | 798.45  | 826.44  | 975.56  | 11 |
| 12 | G  | 855.47  | 883.46  | 862.48  | 10 |
| 13 | G  | 912.49  | 940.48  | 805.46  | 9  |
| 14 | L  | 1025.57 | 1053.57 | 748.44  | 8  |
| 15 | G  | 1082.60 | 1110.59 | 635.35  | 7  |
| 16 | G  | 1139.62 | 1167.61 | 578.33  | 6  |
| 17 | L  | 1252.70 | 1280.70 | 521.31  | 5  |
| 18 | F  | 1399.77 | 1427.76 | 408.22  | 4  |
| 19 | G  | 1456.79 | 1484.79 | 261.16  | 3  |
| 20 | G  | 1513.81 | 1541.81 | 204.13  | 2  |
| 21 | K  | -       | -       | 147.11  | 1  |

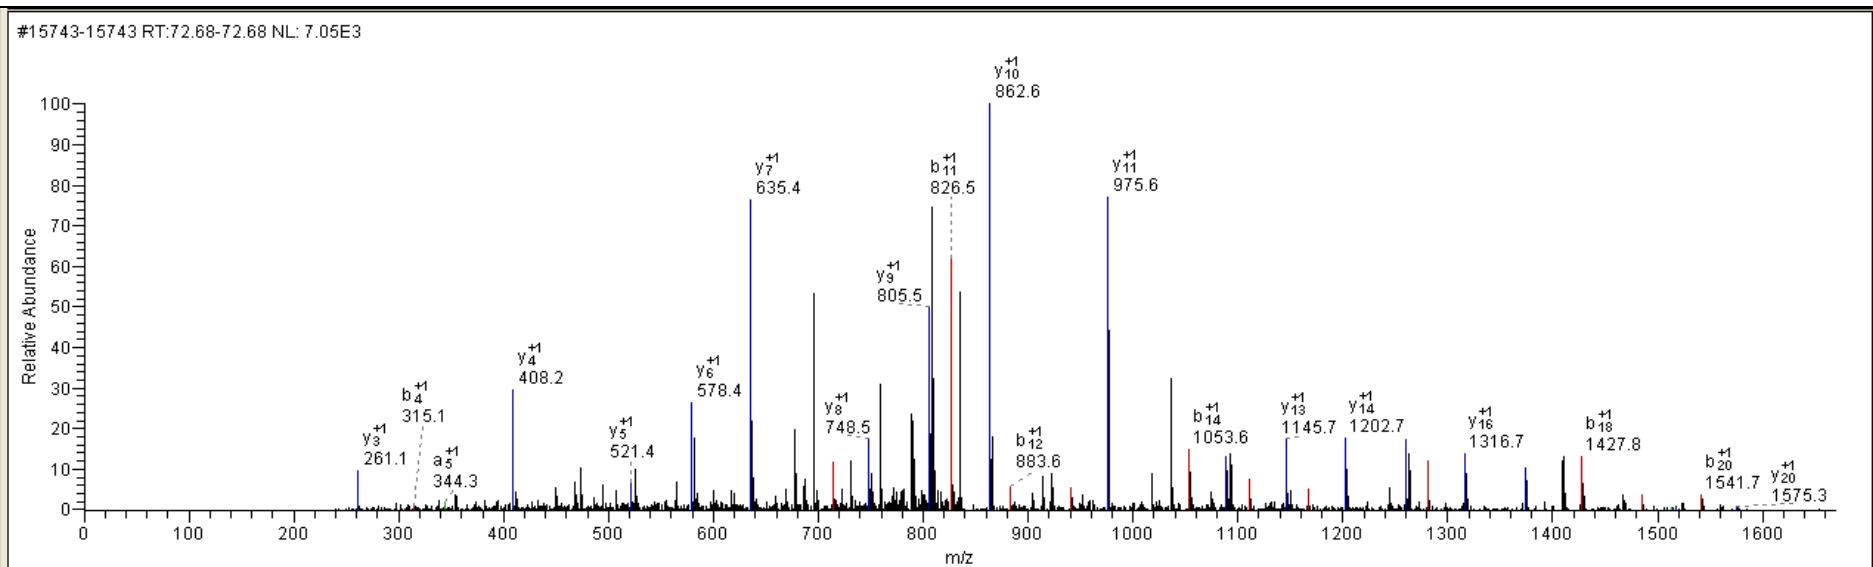

# Pen NP\_477041.1 Pendulin CG4799-PA

## K.EAAWAVTNTTTSGTPEQIVDLIEKYK.I

| S no | AA | A       | B       | Y       |    |
|------|----|---------|---------|---------|----|
| 1    | E  | 102.05  | 130.05  | -       | 26 |
| 2    | A  | 173.09  | 201.09  | 2736.41 | 25 |
| 3    | A  | 244.13  | 272.12  | 2665.37 | 24 |
| 4    | W  | 430.21  | 458.2   | 2594.33 | 23 |
| 5    | A  | 501.25  | 529.24  | 2408.26 | 22 |
| 6    | V  | 600.31  | 628.31  | 2337.22 | 21 |
| 7    | T  | 701.36  | 729.36  | 2238.15 | 20 |
| 8    | N  | 815.4   | 843.4   | 2137.1  | 19 |
| 9    | T  | 916.45  | 944.45  | 2023.06 | 18 |
| 10   | T  | 1017.5  | 1045.49 | 1922.01 | 17 |
| 11   | T  | 1118.55 | 1146.54 | 1820.96 | 16 |
| 12   | S  | 1205.58 | 1233.57 | 1719.92 | 15 |
| 13   | G  | 1262.6  | 1290.6  | 1632.88 | 14 |
| 14   | T  | 1363.65 | 1391.64 | 1575.86 | 13 |
| 15   | P  | 1460.7  | 1488.7  | 1474.82 | 12 |
| 16   | E  | 1589.74 | 1617.74 | 1377.76 | 11 |
| 17   | Q  | 1717.8  | 1745.8  | 1248.72 | 10 |
| 18   | I  | 1830.89 | 1858.88 | 1120.66 | 9  |
| 19   | V  | 1929.96 | 1957.95 | 1007.58 | 8  |
| 20   | D  | 2044.98 | 2072.98 | 908.51  | 7  |
| 21   | L  | 2158.07 | 2186.06 | 793.48  | 6  |
| 22   | I  | 2271.15 | 2299.15 | 680.4   | 5  |
| 23   | E  | 2400.19 | 2428.19 | 567.31  | 4  |
| 24   | K  | 2528.29 | 2556.28 | 438.27  | 3  |
| 25   | Y  | 2691.35 | 2719.35 | 310.18  | 2  |
| 26   | K  | -       | -       | 147.11  | 1  |

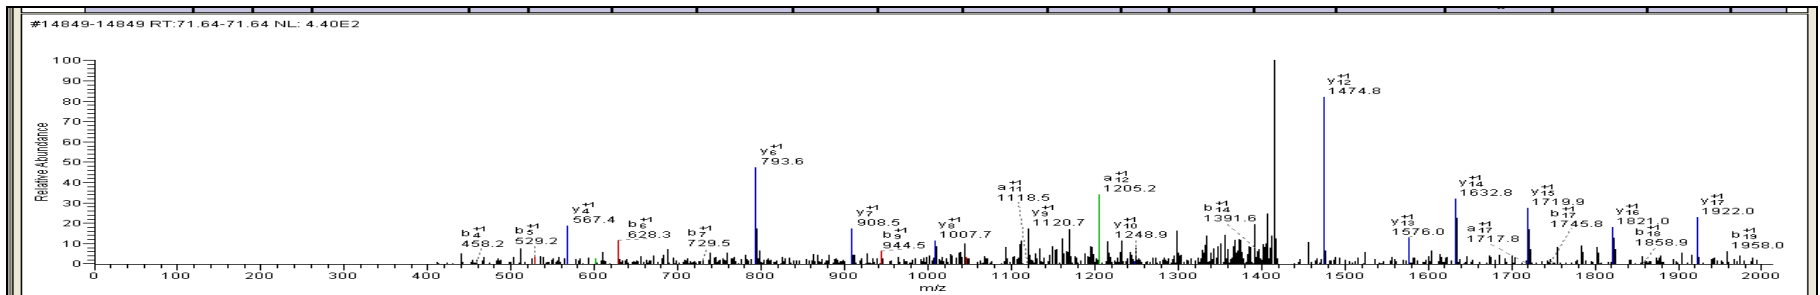

polo NP\_524179.2 polo CG12306-PA

R.FSTIVENGVSKDLYQK.I

|    | AA | A       | B       | Y       |    |
|----|----|---------|---------|---------|----|
| 1  | F  | 120.08  | 148.08  | -       | 16 |
| 2  | S  | 207.11  | 235.11  | 1680.88 | 15 |
| 3  | T  | 308.16  | 336.16  | 1593.85 | 14 |
| 4  | I  | 421.24  | 449.24  | 1492.80 | 13 |
| 5  | V  | 520.31  | 548.31  | 1379.72 | 12 |
| 6  | E  | 649.36  | 677.35  | 1280.65 | 11 |
| 7  | N  | 763.40  | 791.39  | 1151.61 | 10 |
| 8  | G  | 820.42  | 848.41  | 1037.56 | 9  |
| 9  | V  | 919.49  | 947.48  | 980.54  | 8  |
| 10 | S  | 1006.52 | 1034.52 | 881.47  | 7  |
| 11 | K  | 1134.62 | 1162.61 | 794.44  | 6  |
| 12 | D  | 1249.64 | 1277.64 | 666.35  | 5  |
| 13 | L  | 1362.73 | 1390.72 | 551.32  | 4  |
| 14 | Y  | 1525.79 | 1553.78 | 438.23  | 3  |
| 15 | Q  | 1653.85 | 1681.84 | 275.17  | 2  |
| 16 | K  | -       | -       | 147.11  | 1  |

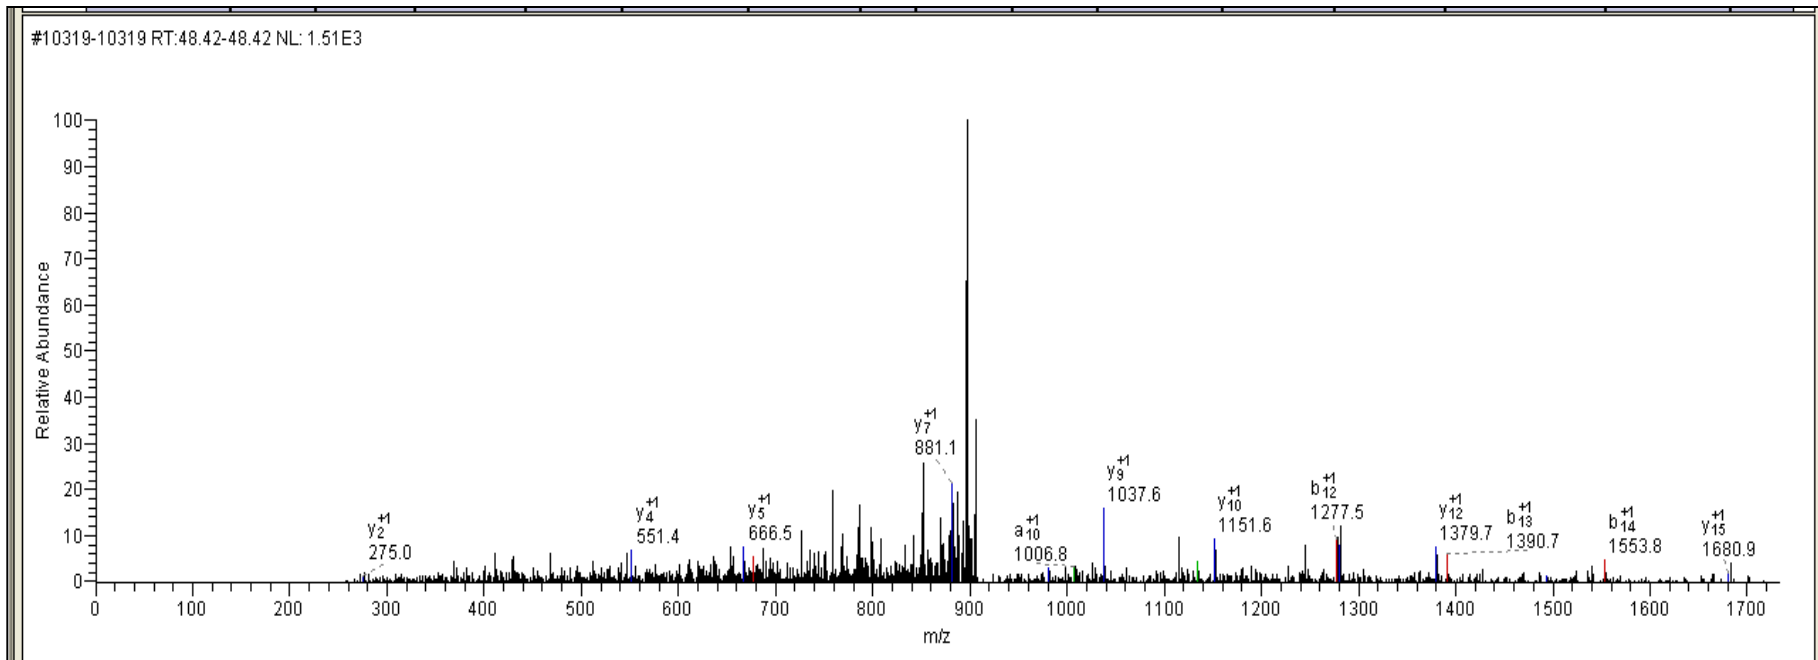



# pAbp NP\_725752.1 polyA-binding protein CG5119-PE

R.SLGYAYVNFQQPADAER.A

|    | AA | A       | B       | Y       |    |
|----|----|---------|---------|---------|----|
| 1  | S  | 60.04   | 88.04   | -       | 17 |
| 2  | L  | 173.13  | 201.12  | 1841.88 | 16 |
| 3  | G  | 230.15  | 258.14  | 1728.80 | 15 |
| 4  | Y  | 393.21  | 421.21  | 1671.78 | 14 |
| 5  | A  | 464.25  | 492.25  | 1508.71 | 13 |
| 6  | Y  | 627.31  | 655.31  | 1437.68 | 12 |
| 7  | V  | 726.38  | 754.38  | 1274.61 | 11 |
| 8  | N  | 840.43  | 868.42  | 1175.54 | 10 |
| 9  | F  | 987.49  | 1015.49 | 1061.50 | 9  |
| 10 | Q  | 1115.55 | 1143.55 | 914.43  | 8  |
| 11 | Q  | 1243.61 | 1271.61 | 786.37  | 7  |
| 12 | P  | 1340.66 | 1368.66 | 658.32  | 6  |
| 13 | A  | 1411.70 | 1439.70 | 561.26  | 5  |
| 14 | D  | 1526.73 | 1554.72 | 490.23  | 4  |
| 15 | A  | 1597.76 | 1625.76 | 375.20  | 3  |
| 16 | E  | 1726.81 | 1754.80 | 304.16  | 2  |
| 17 | R  | -       | -       | 175.12  | 1  |

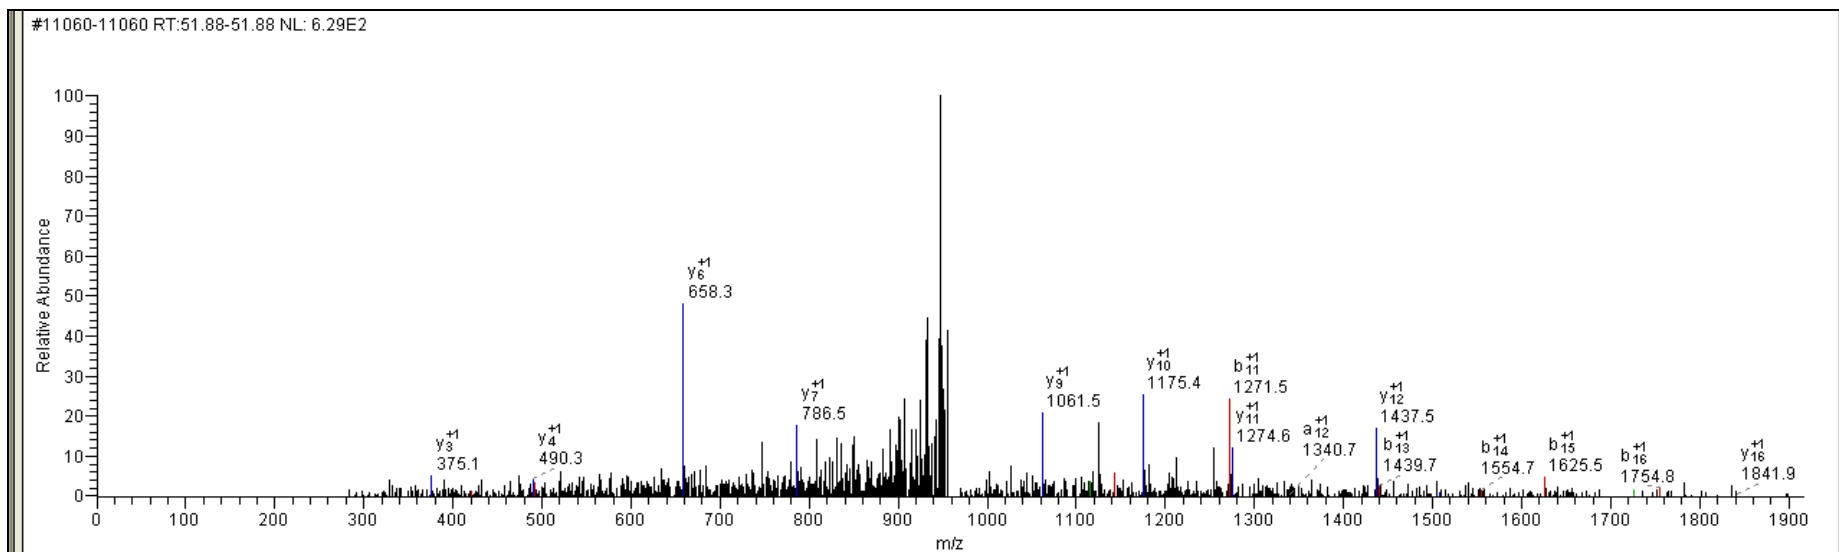

pont NP\_652608.1 pontin CG4003-PA

R.AQTEGLQLEENAFTR.L

|    | AA | A       | B       | Y       |    |
|----|----|---------|---------|---------|----|
| 1  | A  | 44.05   | 72.04   | -       | 15 |
| 2  | Q  | 172.11  | 200.10  | 1635.80 | 14 |
| 3  | T  | 273.16  | 301.15  | 1507.74 | 13 |
| 4  | E  | 402.20  | 430.19  | 1406.69 | 12 |
| 5  | G  | 459.22  | 487.21  | 1277.65 | 11 |
| 6  | L  | 572.30  | 600.30  | 1220.63 | 10 |
| 7  | Q  | 700.36  | 728.36  | 1107.54 | 9  |
| 8  | L  | 813.45  | 841.44  | 979.48  | 8  |
| 9  | E  | 942.49  | 970.48  | 866.40  | 7  |
| 10 | E  | 1071.53 | 1099.53 | 737.36  | 6  |
| 11 | N  | 1185.57 | 1213.57 | 608.32  | 5  |
| 12 | A  | 1256.61 | 1284.61 | 494.27  | 4  |
| 13 | F  | 1403.68 | 1431.68 | 423.24  | 3  |
| 14 | T  | 1504.73 | 1532.72 | 276.17  | 2  |
| 15 | R  | -       | -       | 175.12  | 1  |

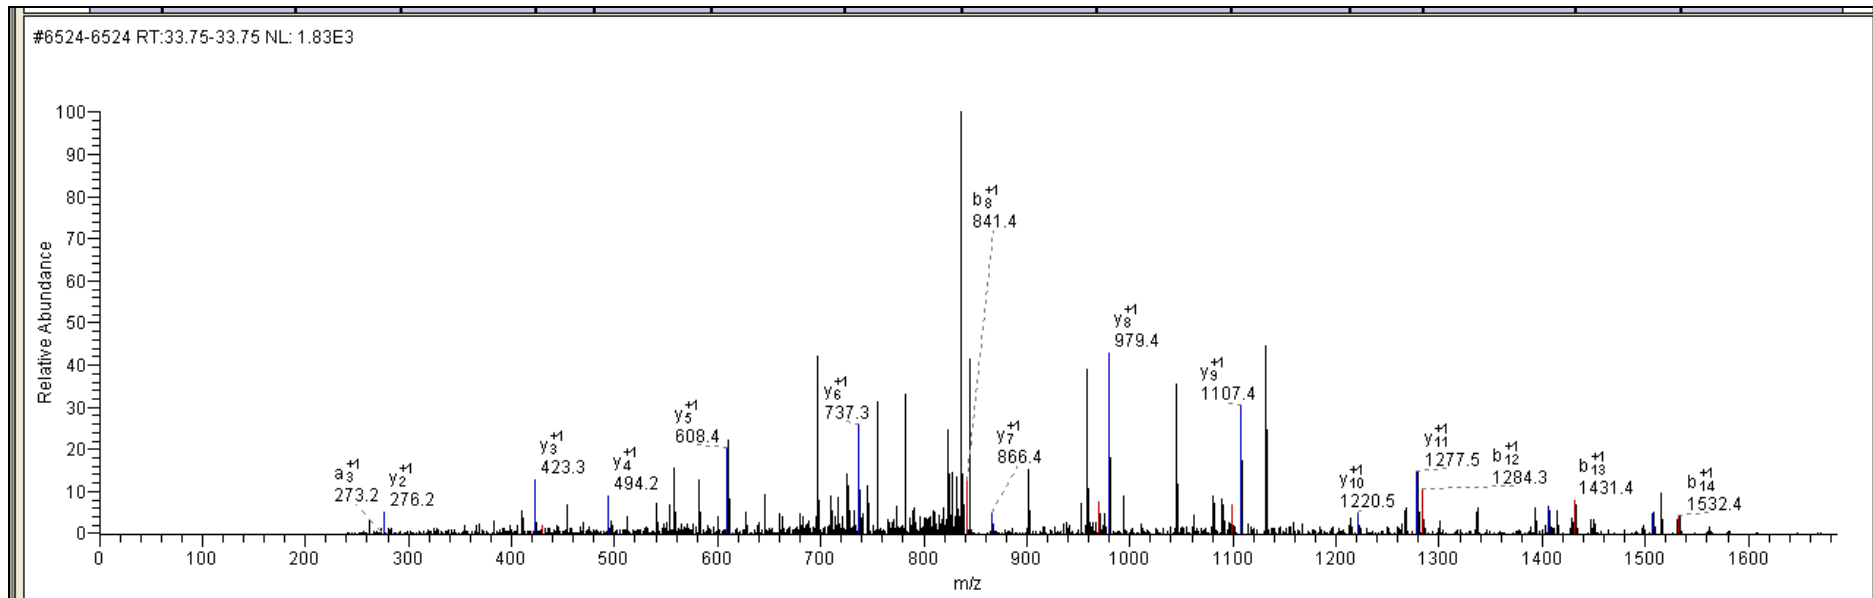

# Pdi NP\_524079.1 Protein disulfide isomerase CG6988-PA

## K.SVFEGELNEENLKK.F

|    | AA | A       | B       | Y       |    |
|----|----|---------|---------|---------|----|
| 1  | S  | 60.04   | 88.04   | -       | 14 |
| 2  | V  | 159.11  | 187.11  | 1548.79 | 13 |
| 3  | F  | 306.18  | 334.18  | 1449.72 | 12 |
| 4  | E  | 435.22  | 463.22  | 1302.65 | 11 |
| 5  | G  | 492.25  | 520.24  | 1173.61 | 10 |
| 6  | E  | 621.29  | 649.28  | 1116.59 | 9  |
| 7  | L  | 734.37  | 762.37  | 987.55  | 8  |
| 8  | N  | 848.41  | 876.41  | 874.46  | 7  |
| 9  | E  | 977.46  | 1005.45 | 760.42  | 6  |
| 10 | E  | 1106.50 | 1134.49 | 631.38  | 5  |
| 11 | N  | 1220.54 | 1248.54 | 502.33  | 4  |
| 12 | L  | 1333.63 | 1361.62 | 388.29  | 3  |
| 13 | K  | 1461.72 | 1489.72 | 275.21  | 2  |
| 14 | K  | -       | -       | 147.11  | 1  |

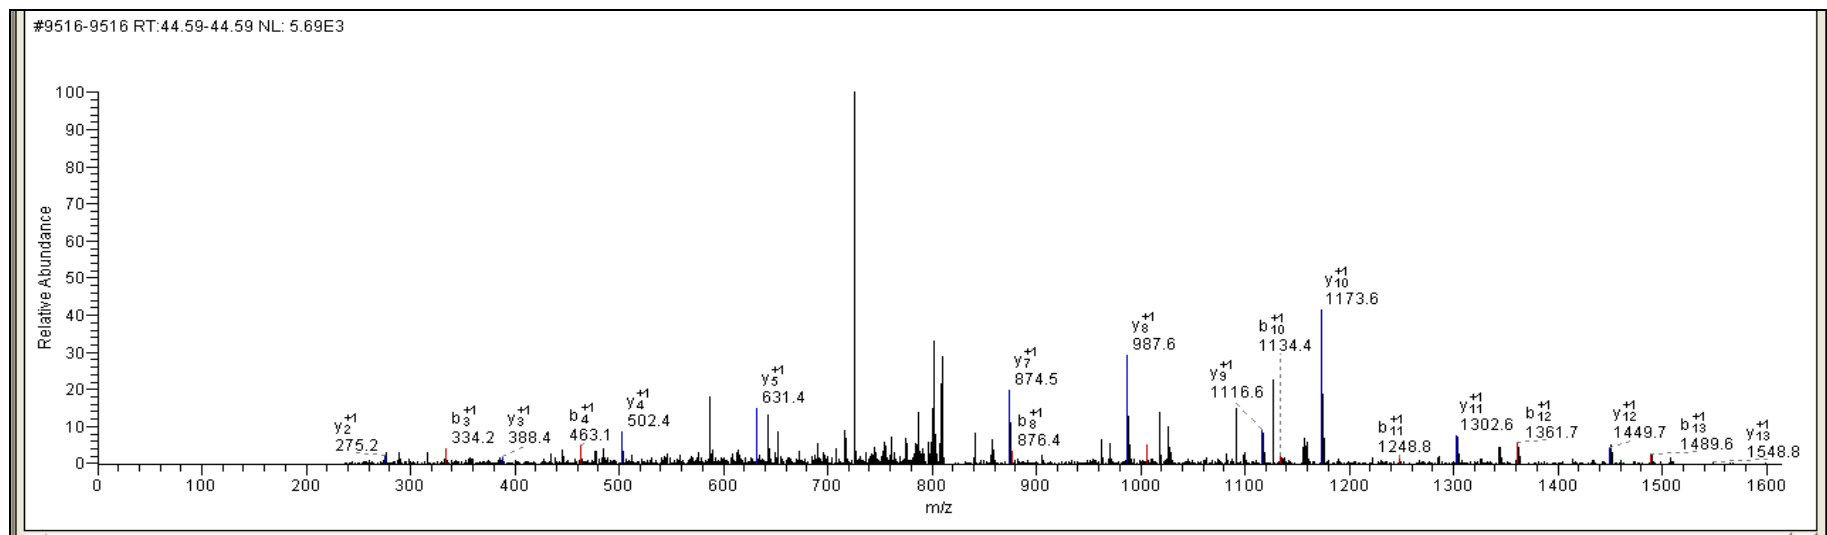

# Pp2A-29B NP\_001027227.1

Protein phosphatase 2A at 29B CG17291-PA

K.SDLIPNFVQLAQDDQDSVR.L

|    | AA | A       | B       | Y       |    |
|----|----|---------|---------|---------|----|
| 1  | S  | 60.04   | 88.04   | -       | 19 |
| 2  | D  | 175.07  | 203.07  | 2073.02 | 18 |
| 3  | L  | 288.16  | 316.15  | 1958.00 | 17 |
| 4  | I  | 401.24  | 429.23  | 1844.91 | 16 |
| 5  | P  | 498.29  | 526.29  | 1731.83 | 15 |
| 6  | N  | 612.34  | 640.33  | 1634.78 | 14 |
| 7  | F  | 759.40  | 787.40  | 1520.73 | 13 |
| 8  | V  | 858.47  | 886.47  | 1373.67 | 12 |
| 9  | Q  | 986.53  | 1014.53 | 1274.60 | 11 |
| 10 | L  | 1099.61 | 1127.61 | 1146.54 | 10 |
| 11 | A  | 1170.65 | 1198.65 | 1033.45 | 9  |
| 12 | Q  | 1298.71 | 1326.71 | 962.42  | 8  |
| 13 | D  | 1413.74 | 1441.73 | 834.36  | 7  |
| 14 | D  | 1528.76 | 1556.76 | 719.33  | 6  |
| 15 | Q  | 1656.82 | 1684.82 | 604.30  | 5  |
| 16 | D  | 1771.85 | 1799.84 | 476.25  | 4  |
| 17 | S  | 1858.88 | 1886.88 | 361.22  | 3  |
| 18 | V  | 1957.95 | 1985.95 | 274.19  | 2  |
| 19 | R  | -       | -       | 175.12  | 1  |

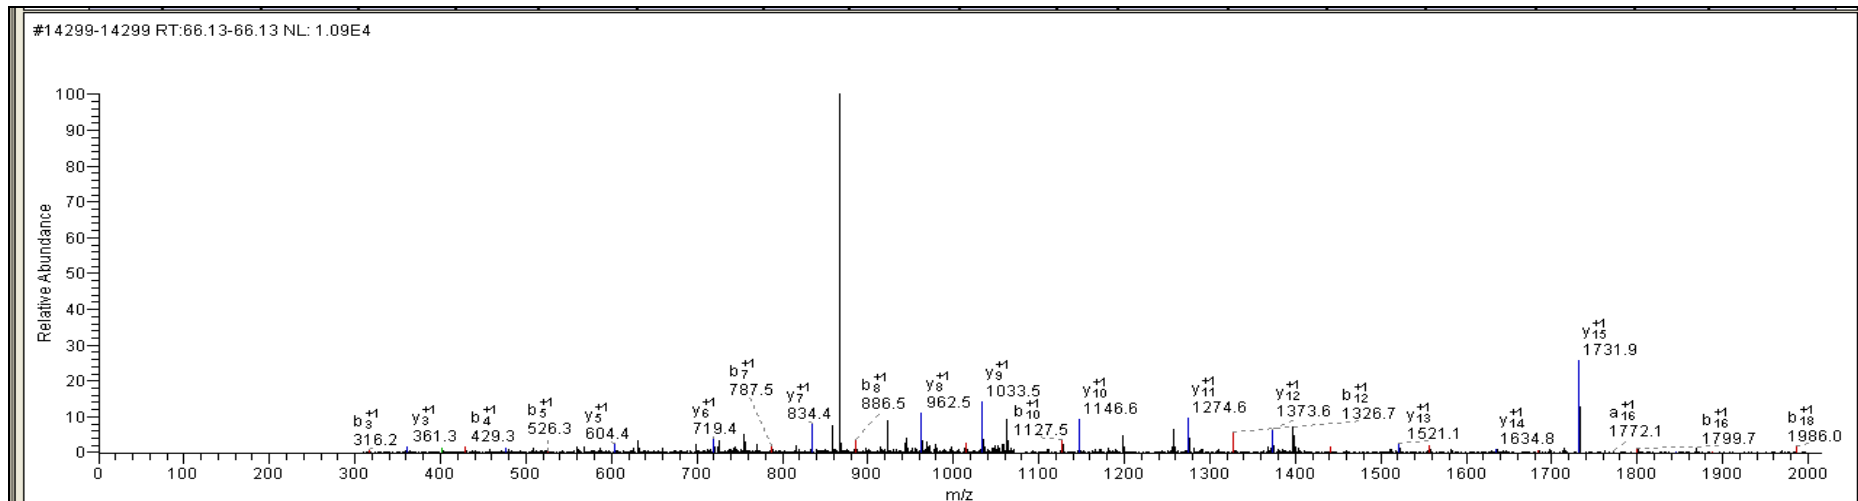

# prp8 NP\_610735.1 prp8 CG8877-PA

## K.EQNQLTATTTR.T

|    | AA | A       | B       | Y       |    |
|----|----|---------|---------|---------|----|
| 1  | E  | 102.05  | 130.05  | -       | 11 |
| 2  | Q  | 230.11  | 258.11  | 1133.59 | 10 |
| 3  | N  | 344.16  | 372.15  | 1005.53 | 9  |
| 4  | Q  | 472.22  | 500.21  | 891.49  | 8  |
| 5  | L  | 585.30  | 613.29  | 763.43  | 7  |
| 6  | T  | 686.35  | 714.34  | 650.35  | 6  |
| 7  | A  | 757.38  | 785.38  | 549.30  | 5  |
| 8  | T  | 858.43  | 886.43  | 478.26  | 4  |
| 9  | T  | 959.48  | 987.47  | 377.21  | 3  |
| 10 | T  | 1060.53 | 1088.52 | 276.17  | 2  |
| 11 | R  | -       | -       | 175.12  | 1  |

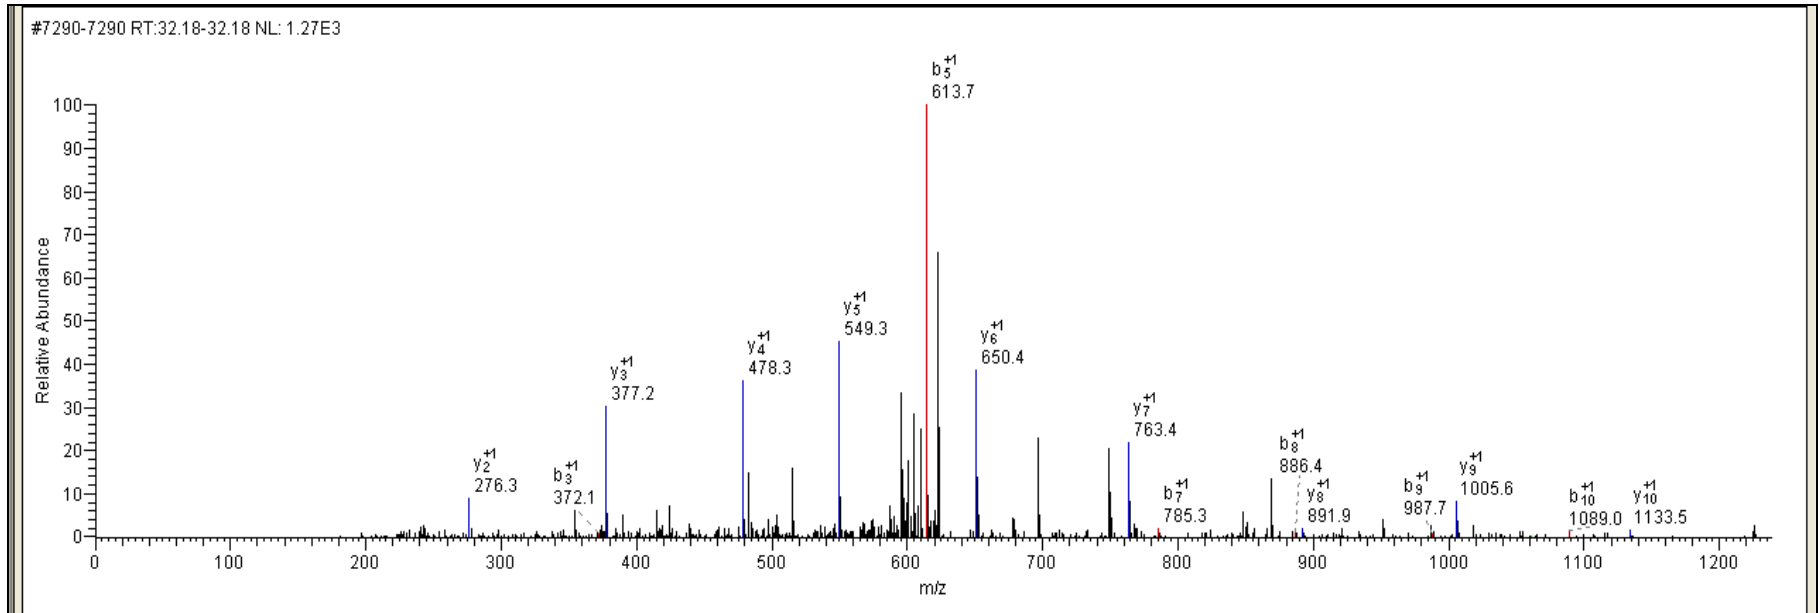

# PyK NP\_524448.3 Pyruvate kinase CG7070-PA

## K.IISKIENQQGMHNLDEIIEAGDGIMVAR.G

| S no | AA | A       | B       | Y       |    |
|------|----|---------|---------|---------|----|
| 1    | I  | 86.1    | 114.09  | -       | 28 |
| 2    | I  | 199.18  | 227.18  | 3013.47 | 27 |
| 3    | S  | 286.21  | 314.21  | 2900.39 | 26 |
| 4    | K  | 414.31  | 442.3   | 2813.36 | 25 |
| 5    | I  | 527.39  | 555.39  | 2685.26 | 24 |
| 6    | E  | 656.43  | 684.43  | 2572.18 | 23 |
| 7    | N  | 770.48  | 798.47  | 2443.13 | 22 |
| 8    | Q  | 898.54  | 926.53  | 2329.09 | 21 |
| 9    | Q  | 1026.59 | 1054.59 | 2201.03 | 20 |
| 10   | G  | 1083.62 | 1111.61 | 2072.97 | 19 |
| 11   | M* | 1230.65 | 1258.65 | 2015.95 | 18 |
| 12   | H  | 1367.71 | 1395.7  | 1868.92 | 17 |
| 13   | N  | 1481.75 | 1509.75 | 1731.86 | 16 |
| 14   | L  | 1594.84 | 1622.83 | 1617.82 | 15 |
| 15   | D  | 1709.86 | 1737.86 | 1504.73 | 14 |
| 16   | E  | 1838.91 | 1866.9  | 1389.7  | 13 |
| 17   | I  | 1951.99 | 1979.99 | 1260.66 | 12 |
| 18   | I  | 2065.07 | 2093.07 | 1147.58 | 11 |
| 19   | E  | 2194.12 | 2222.11 | 1034.49 | 10 |
| 20   | A  | 2265.15 | 2293.15 | 905.45  | 9  |
| 21   | G  | 2322.18 | 2350.17 | 834.41  | 8  |
| 22   | D  | 2437.2  | 2465.2  | 777.39  | 7  |
| 23   | G  | 2494.22 | 2522.22 | 662.37  | 6  |
| 24   | I  | 2607.31 | 2635.3  | 605.34  | 5  |
| 25   | M* | 2754.34 | 2782.34 | 492.26  | 4  |
| 26   | V  | 2853.41 | 2881.41 | 345.22  | 3  |
| 27   | A  | 2924.45 | 2952.44 | 246.16  | 2  |
| 28   | R  | -       | -       | 175.12  | 1  |

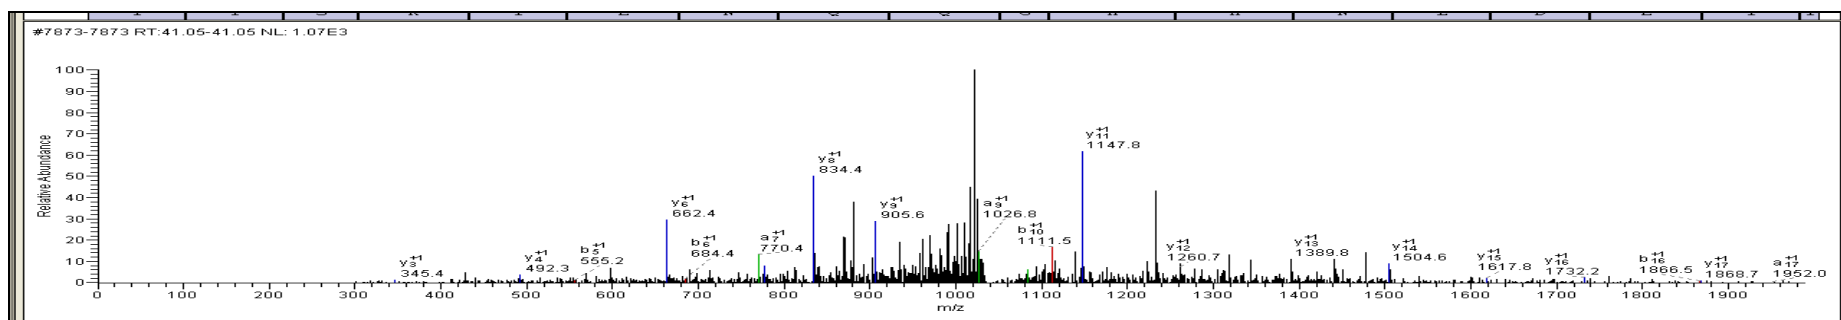

# Rab5 NP\_722795.1 Rab-protein 5 CG3664-PA

## R.GAQAAIVVYDIQNQDSFQR.A

|    | AA | A       | B       | Y       |    |
|----|----|---------|---------|---------|----|
| 1  | G  | 30.03   | 58.03   | -       | 19 |
| 2  | A  | 101.07  | 129.07  | 2066.03 | 18 |
| 3  | Q  | 229.13  | 257.12  | 1994.99 | 17 |
| 4  | A  | 300.17  | 328.16  | 1866.93 | 16 |
| 5  | A  | 371.20  | 399.20  | 1795.90 | 15 |
| 6  | I  | 484.29  | 512.28  | 1724.86 | 14 |
| 7  | V  | 583.36  | 611.35  | 1611.78 | 13 |
| 8  | V  | 682.42  | 710.42  | 1512.71 | 12 |
| 9  | Y  | 845.49  | 873.48  | 1413.64 | 11 |
| 10 | D  | 960.51  | 988.51  | 1250.58 | 10 |
| 11 | I  | 1073.60 | 1101.59 | 1135.55 | 9  |
| 12 | Q  | 1201.66 | 1229.65 | 1022.46 | 8  |
| 13 | N  | 1315.70 | 1343.70 | 894.41  | 7  |
| 14 | Q  | 1443.76 | 1471.75 | 780.36  | 6  |
| 15 | D  | 1558.79 | 1586.78 | 652.30  | 5  |
| 16 | S  | 1645.82 | 1673.81 | 537.28  | 4  |
| 17 | F  | 1792.89 | 1820.88 | 450.25  | 3  |
| 18 | Q  | 1920.95 | 1948.94 | 303.18  | 2  |
| 19 | R  | -       | -       | 175.12  | 1  |

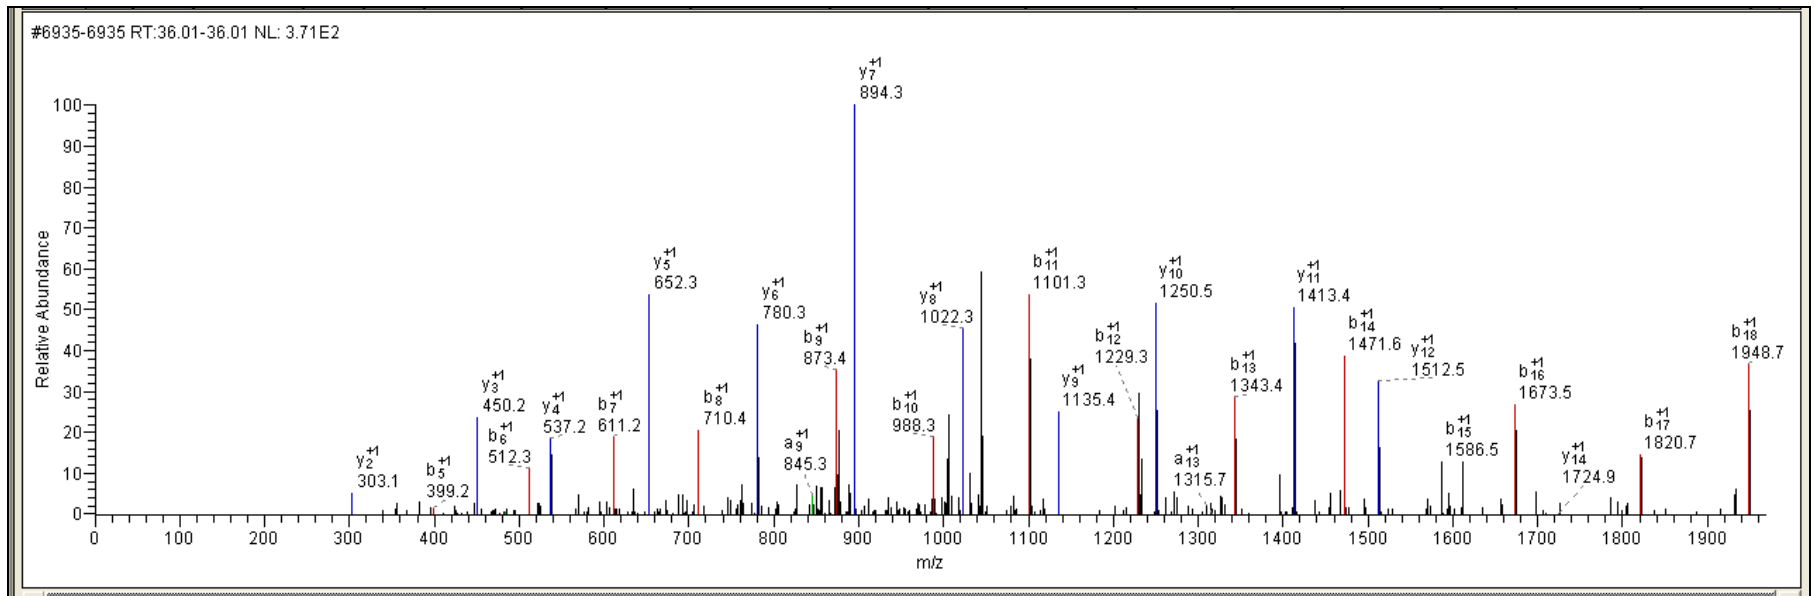

# RfC38 NP\_609494.1

## Replication factor C 38kD subunit CG6258-PA

### K.APFTANQEIPDLDWQVFLR.E

|    | AA | A       | B       | Y       |    |
|----|----|---------|---------|---------|----|
| 1  | A  | 44.05   | 72.04   | -       | 19 |
| 2  | P  | 141.10  | 169.10  | 2189.10 | 18 |
| 3  | F  | 288.17  | 316.17  | 2092.05 | 17 |
| 4  | T  | 389.22  | 417.21  | 1944.98 | 16 |
| 5  | A  | 460.26  | 488.25  | 1843.93 | 15 |
| 6  | N  | 574.30  | 602.29  | 1772.90 | 14 |
| 7  | Q  | 702.36  | 730.35  | 1658.85 | 13 |
| 8  | E  | 831.40  | 859.39  | 1530.80 | 12 |
| 9  | I  | 944.48  | 972.48  | 1401.75 | 11 |
| 10 | P  | 1041.54 | 1069.53 | 1288.67 | 10 |
| 11 | D  | 1156.56 | 1184.56 | 1191.62 | 9  |
| 12 | L  | 1269.65 | 1297.64 | 1076.59 | 8  |
| 13 | D  | 1384.67 | 1412.67 | 963.50  | 7  |
| 14 | W  | 1570.75 | 1598.75 | 848.48  | 6  |
| 15 | Q  | 1698.81 | 1726.81 | 662.40  | 5  |
| 16 | V  | 1797.88 | 1825.88 | 534.34  | 4  |
| 17 | F  | 1944.95 | 1972.94 | 435.27  | 3  |
| 18 | L  | 2058.03 | 2086.03 | 288.20  | 2  |
| 19 | R  | -       | -       | 175.12  | 1  |

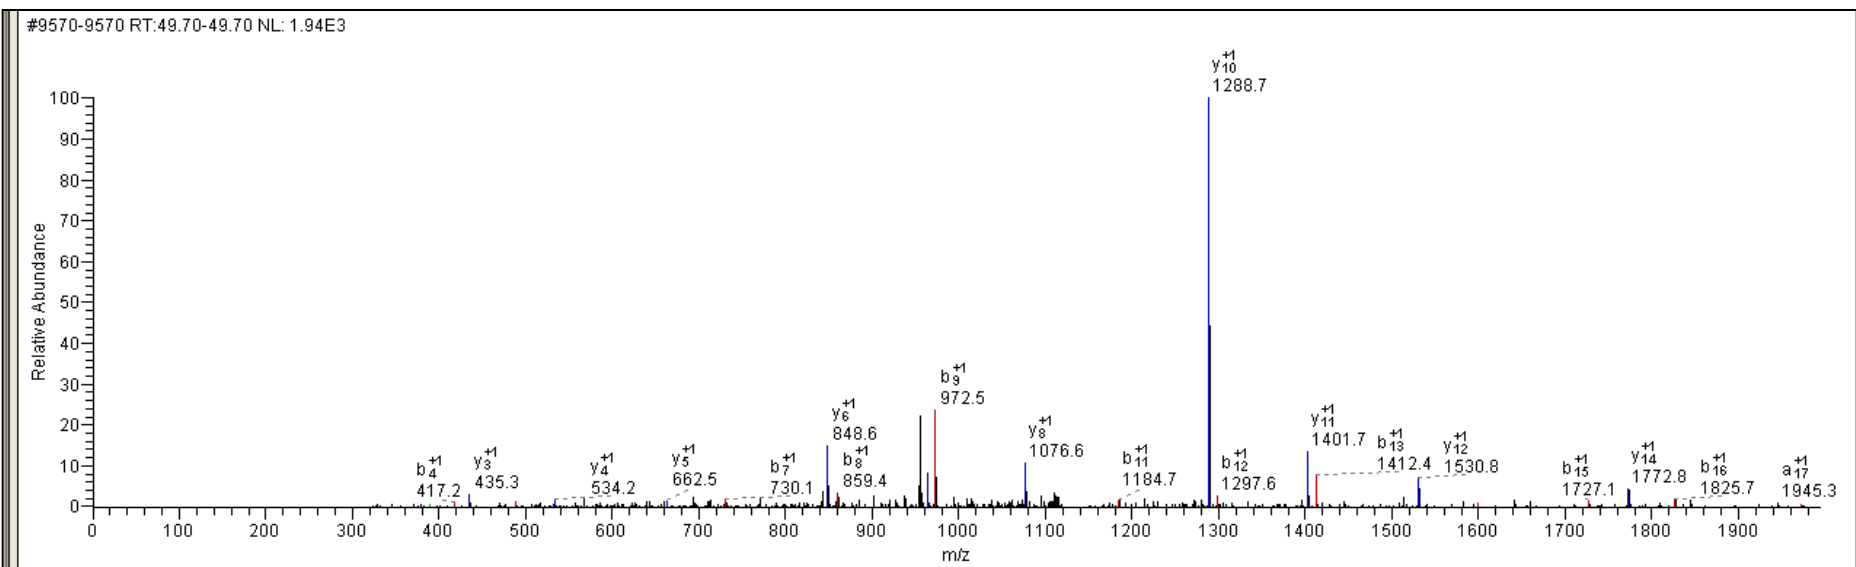



# RfC3 NP\_609399.1 RfC3 CG5313-PA

## K.IIEAEAVQITEDGKR.A

|    | AA | A       | B       | Y       |    |
|----|----|---------|---------|---------|----|
| 1  | I  | 86.10   | 114.09  | -       | 15 |
| 2  | I  | 199.18  | 227.18  | 1558.81 | 14 |
| 3  | E  | 328.22  | 356.22  | 1445.72 | 13 |
| 4  | A  | 399.26  | 427.26  | 1316.68 | 12 |
| 5  | E  | 528.30  | 556.30  | 1245.64 | 11 |
| 6  | A  | 599.34  | 627.33  | 1116.60 | 10 |
| 7  | V  | 698.41  | 726.40  | 1045.56 | 9  |
| 8  | Q  | 826.47  | 854.46  | 946.50  | 8  |
| 9  | I  | 939.55  | 967.55  | 818.44  | 7  |
| 10 | T  | 1040.60 | 1068.59 | 705.35  | 6  |
| 11 | E  | 1169.64 | 1197.64 | 604.30  | 5  |
| 12 | D  | 1284.67 | 1312.66 | 475.26  | 4  |
| 13 | G  | 1341.69 | 1369.68 | 360.24  | 3  |
| 14 | K  | 1469.78 | 1497.78 | 303.21  | 2  |
| 15 | R  | -       | -       | 175.12  | 1  |

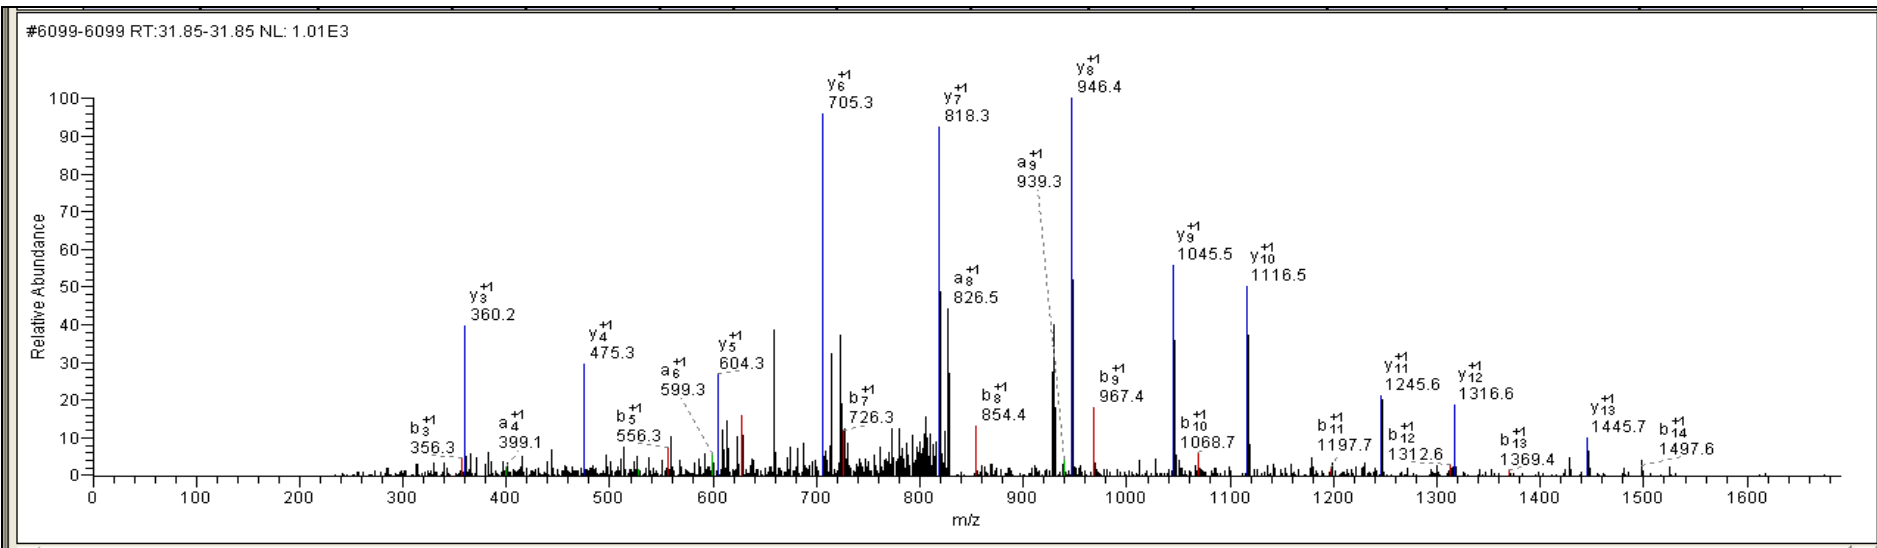

# RhoGEF2 NP\_995868.1 RhoGEF2 CG9635-PF

## K.DLTTSSPFGLTTDFLQQQR.M

|    | AA | A       | B       | Y       |    |
|----|----|---------|---------|---------|----|
| 1  | D  | 88.04   | 116.03  | -       | 19 |
| 2  | L  | 201.12  | 229.12  | 2040.04 | 18 |
| 3  | T  | 302.17  | 330.17  | 1926.96 | 17 |
| 4  | T  | 403.22  | 431.21  | 1825.91 | 16 |
| 5  | S  | 490.25  | 518.25  | 1724.86 | 15 |
| 6  | S  | 577.28  | 605.28  | 1637.83 | 14 |
| 7  | P  | 674.34  | 702.33  | 1550.80 | 13 |
| 8  | F  | 821.40  | 849.40  | 1453.74 | 12 |
| 9  | G  | 878.43  | 906.42  | 1306.67 | 11 |
| 10 | L  | 991.51  | 1019.50 | 1249.65 | 10 |
| 11 | T  | 1092.56 | 1120.55 | 1136.57 | 9  |
| 12 | T  | 1193.60 | 1221.60 | 1035.52 | 8  |
| 13 | D  | 1308.63 | 1336.63 | 934.47  | 7  |
| 14 | F  | 1455.70 | 1483.70 | 819.45  | 6  |
| 15 | L  | 1568.78 | 1596.78 | 672.38  | 5  |
| 16 | Q  | 1696.84 | 1724.84 | 559.29  | 4  |
| 17 | Q  | 1824.90 | 1852.90 | 431.24  | 3  |
| 18 | Q  | 1952.96 | 1980.95 | 303.18  | 2  |
| 19 | R  | -       | -       | 175.12  | 1  |

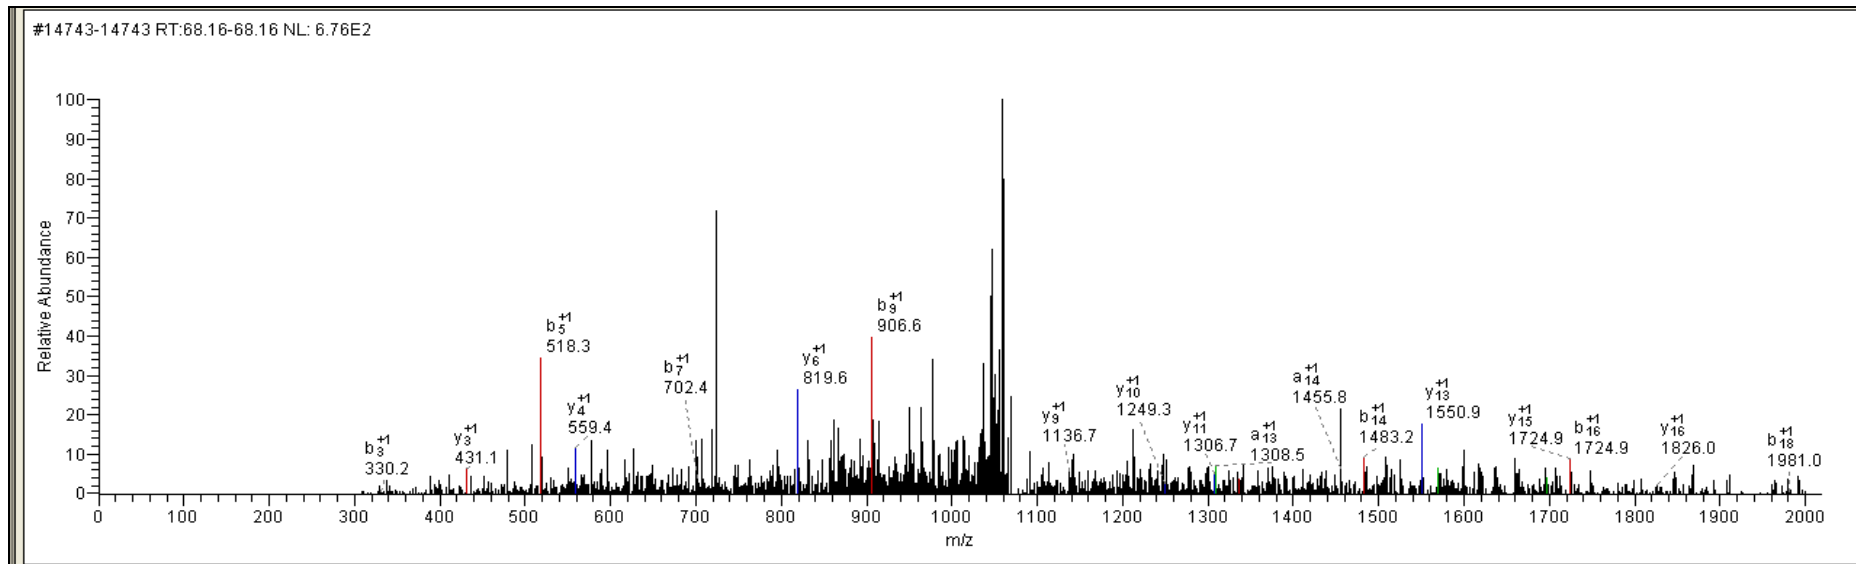

# RpL10Ab NP\_648514.1 Ribosomal protein L10Ab CG7283-PA

## K.SYDAFLASESLIK.Q

|    | AA | A       | B       | Y       |    |
|----|----|---------|---------|---------|----|
| 1  | S  | 60.04   | 88.04   | -       | 13 |
| 2  | Y  | 223.11  | 251.10  | 1356.70 | 12 |
| 3  | D  | 338.13  | 366.13  | 1193.64 | 11 |
| 4  | A  | 409.17  | 437.17  | 1078.61 | 10 |
| 5  | F  | 556.24  | 584.24  | 1007.58 | 9  |
| 6  | L  | 669.32  | 697.32  | 860.51  | 8  |
| 7  | A  | 740.36  | 768.36  | 747.42  | 7  |
| 8  | S  | 827.39  | 855.39  | 676.39  | 6  |
| 9  | E  | 956.44  | 984.43  | 589.36  | 5  |
| 10 | S  | 1043.47 | 1071.46 | 460.31  | 4  |
| 11 | L  | 1156.55 | 1184.55 | 373.28  | 3  |
| 12 | I  | 1269.64 | 1297.63 | 260.20  | 2  |
| 13 | K  | -       | -       | 147.11  | 1  |

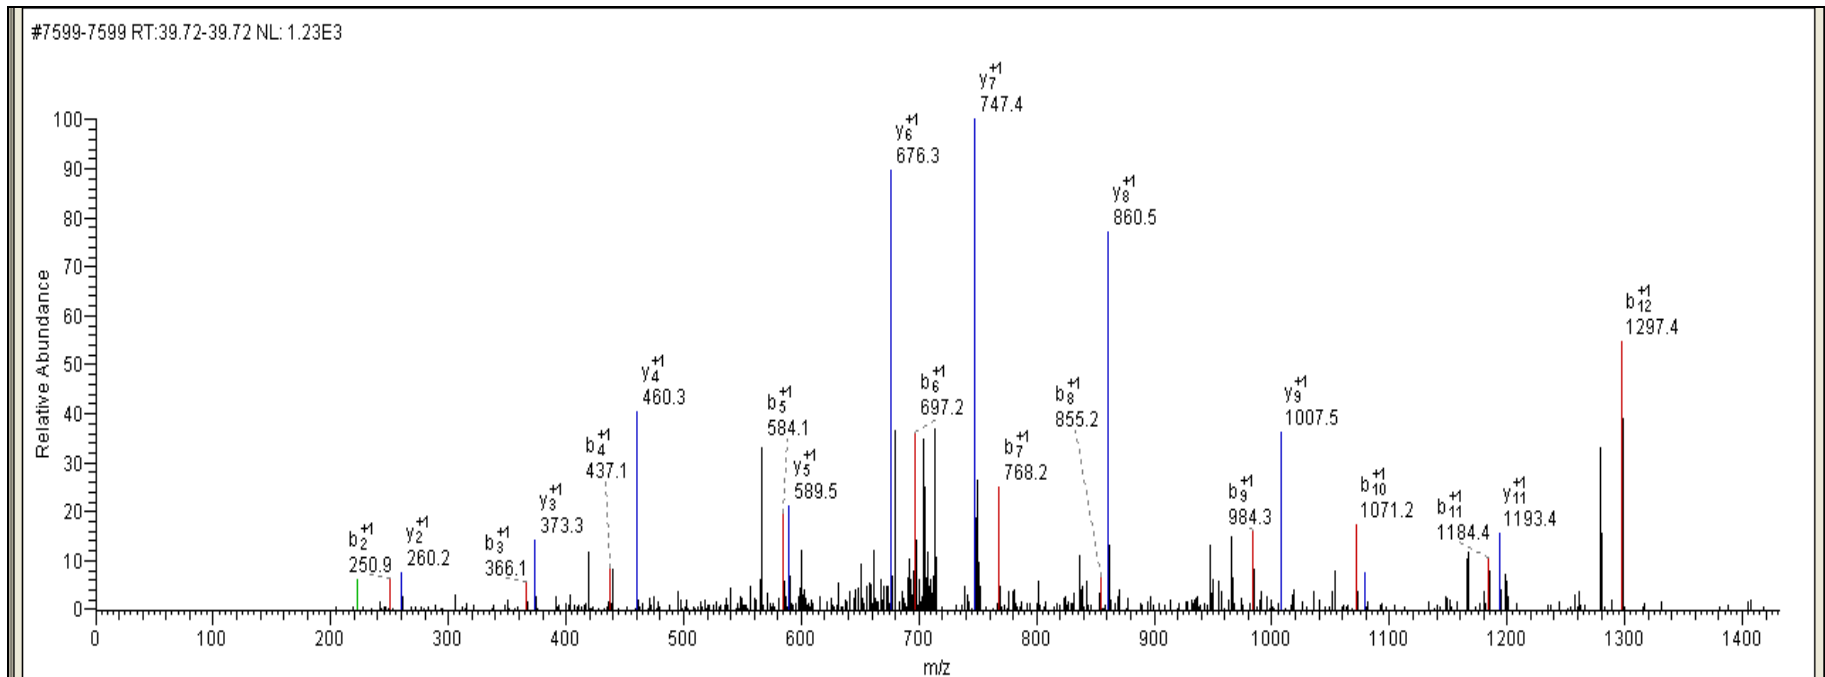

# RpL12 NP\_524819.1 Ribosomal protein L12 CG3195-PA

## K.HSGNIGFEDILAIAR.V

|    | AA | A       | B       | Y       |    |
|----|----|---------|---------|---------|----|
| 1  | H  | 110.07  | 138.07  | -       | 15 |
| 2  | S  | 197.10  | 225.10  | 1475.79 | 14 |
| 3  | G  | 254.12  | 282.12  | 1388.75 | 13 |
| 4  | N  | 368.17  | 396.16  | 1331.73 | 12 |
| 5  | I  | 481.25  | 509.25  | 1217.69 | 11 |
| 6  | G  | 538.27  | 566.27  | 1104.60 | 10 |
| 7  | F  | 685.34  | 713.34  | 1047.58 | 9  |
| 8  | E  | 814.38  | 842.38  | 900.51  | 8  |
| 9  | D  | 929.41  | 957.41  | 771.47  | 7  |
| 10 | I  | 1042.50 | 1070.49 | 656.45  | 6  |
| 11 | L  | 1155.58 | 1183.57 | 543.36  | 5  |
| 12 | A  | 1226.62 | 1254.61 | 430.28  | 4  |
| 13 | I  | 1339.70 | 1367.70 | 359.24  | 3  |
| 14 | A  | 1410.74 | 1438.73 | 246.16  | 2  |
| 15 | R  | -       | -       | 175.12  | 1  |

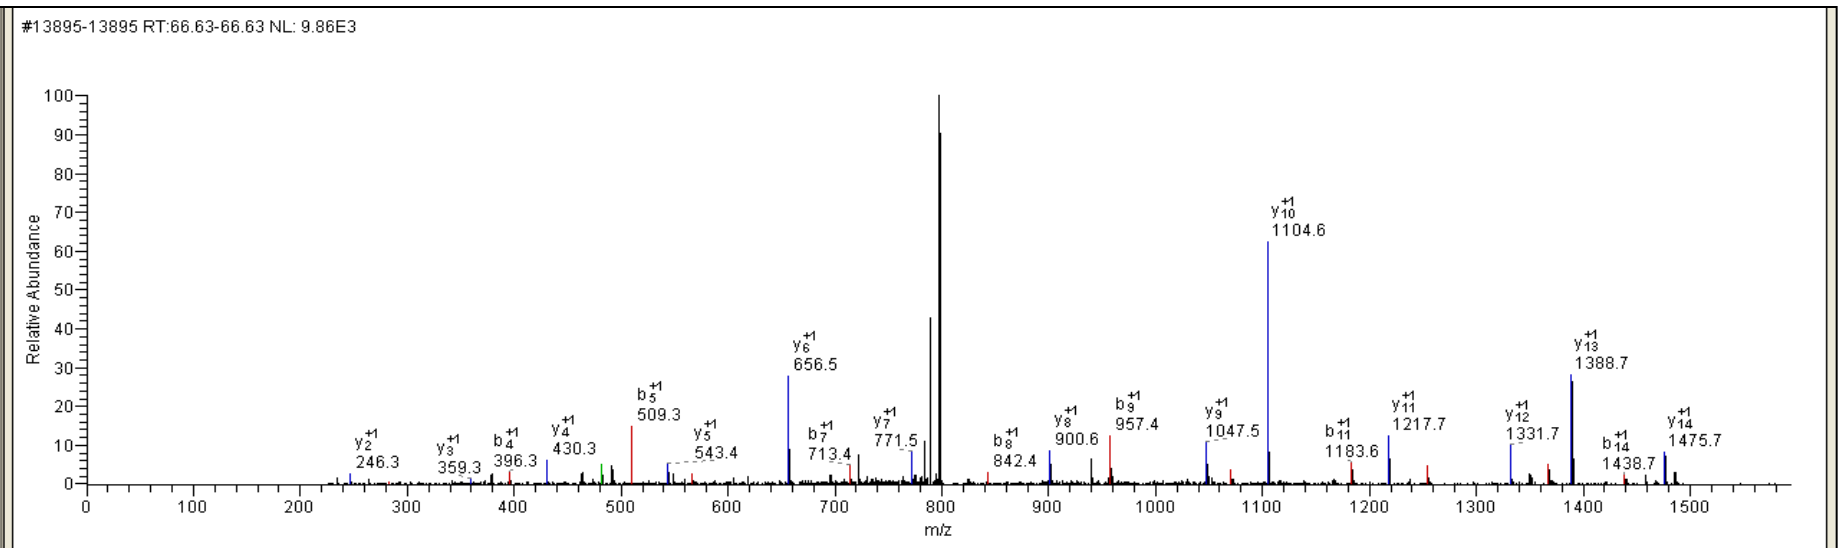

# RpL13A NP\_649560.1 Ribosomal protein L13A CG1475-PB

## R.LSHEVGWHYQDVIK.S

|    | AA | A       | B       | Y       |    |
|----|----|---------|---------|---------|----|
| 1  | L  | 86.10   | 114.09  | -       | 14 |
| 2  | S  | 173.13  | 201.12  | 1597.78 | 13 |
| 3  | H  | 310.19  | 338.18  | 1510.74 | 12 |
| 4  | E  | 439.23  | 467.22  | 1373.68 | 11 |
| 5  | V  | 538.30  | 566.29  | 1244.64 | 10 |
| 6  | G  | 595.32  | 623.31  | 1145.57 | 9  |
| 7  | W  | 781.40  | 809.39  | 1088.55 | 8  |
| 8  | H  | 918.46  | 946.45  | 902.47  | 7  |
| 9  | Y  | 1081.52 | 1109.52 | 765.41  | 6  |
| 10 | Q  | 1209.58 | 1237.57 | 602.35  | 5  |
| 11 | D  | 1324.61 | 1352.60 | 474.29  | 4  |
| 12 | V  | 1423.68 | 1451.67 | 359.27  | 3  |
| 13 | I  | 1536.76 | 1564.75 | 260.20  | 2  |
| 14 | K  | -       | -       | 147.11  | 1  |

#6293-6293 RT:32.61-32.61 NL: 2.59E3

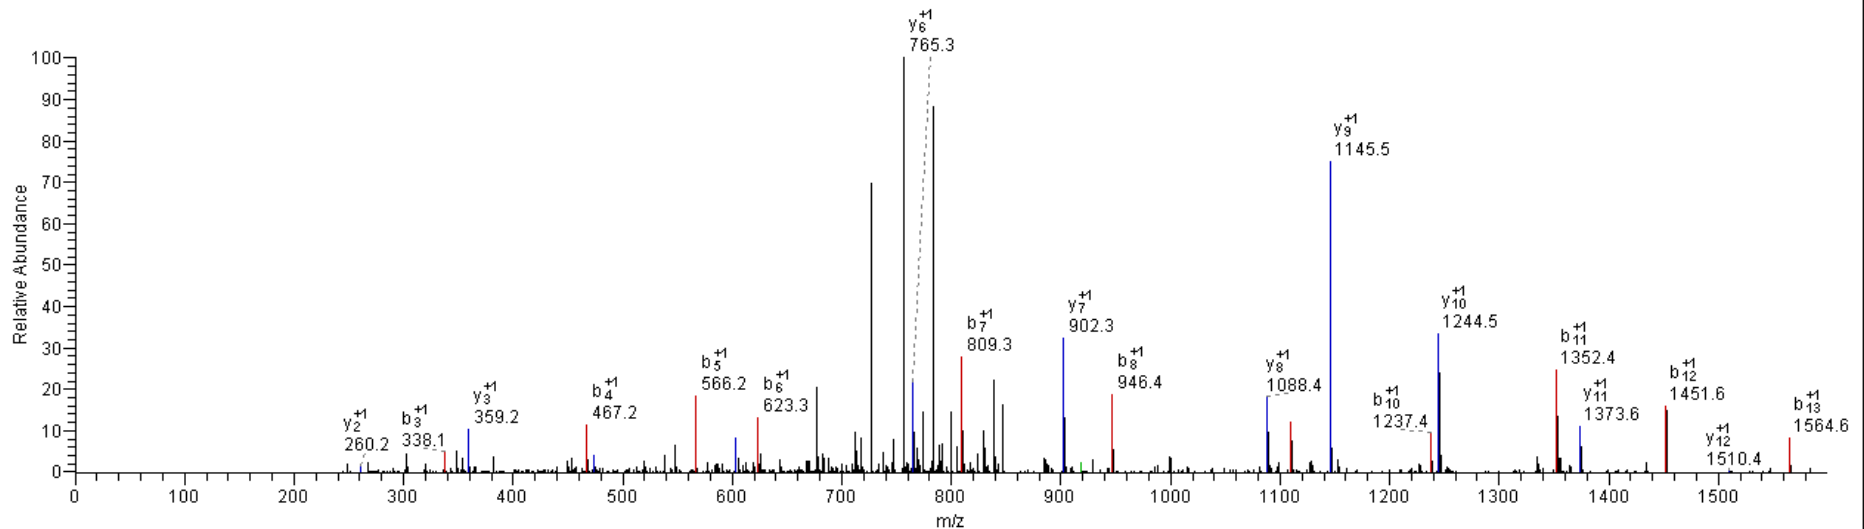

# RpL23 NP\_523813.1 Ribosomal protein L23 CG3661-PA

## R.LNRLPAAGVGDMFVATVK.K

|    | AA | A       | B       | Y       |    |
|----|----|---------|---------|---------|----|
| 1  | L  | 86.10   | 114.09  | -       | 18 |
| 2  | N  | 200.14  | 228.13  | 1745.94 | 17 |
| 3  | R  | 356.24  | 384.24  | 1631.89 | 16 |
| 4  | L  | 469.32  | 497.32  | 1475.79 | 15 |
| 5  | P  | 566.38  | 594.37  | 1362.71 | 14 |
| 6  | A  | 637.41  | 665.41  | 1265.66 | 13 |
| 7  | A  | 708.45  | 736.45  | 1194.62 | 12 |
| 8  | G  | 765.47  | 793.47  | 1123.58 | 11 |
| 9  | V  | 864.54  | 892.54  | 1066.56 | 10 |
| 10 | G  | 921.56  | 949.56  | 967.49  | 9  |
| 11 | D  | 1036.59 | 1064.58 | 910.47  | 8  |
| 12 | M  | 1167.63 | 1195.63 | 795.44  | 7  |
| 13 | F  | 1314.70 | 1342.69 | 664.40  | 6  |
| 14 | V  | 1413.77 | 1441.76 | 517.33  | 5  |
| 15 | A  | 1484.80 | 1512.80 | 418.27  | 4  |
| 16 | T  | 1585.85 | 1613.85 | 347.23  | 3  |
| 17 | V  | 1684.92 | 1712.92 | 246.18  | 2  |
| 18 | K  | -       | -       | 147.11  | 1  |

#7406-7406 RT:38.20-38.20 NL: 1.84E3

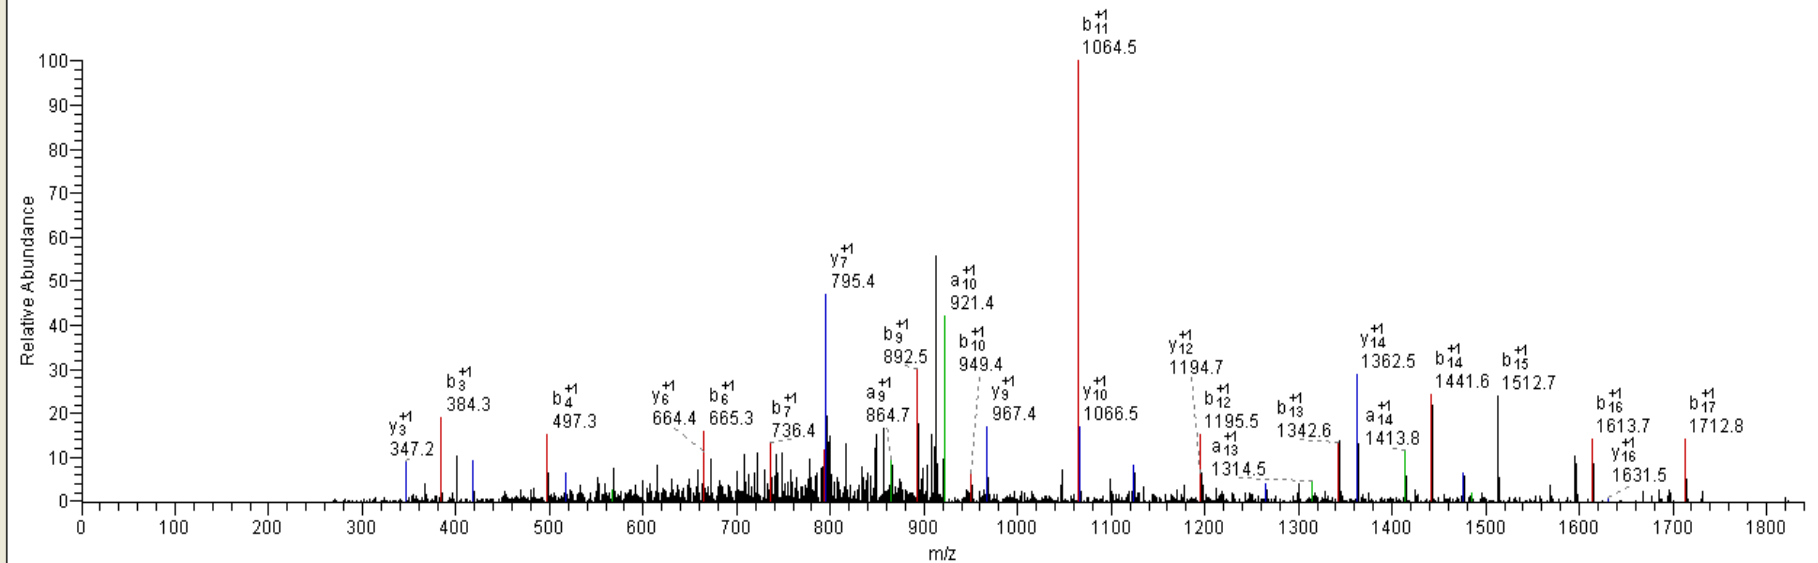

# RpL26 NP\_649070.1 Ribosomal protein L26 CG6846-PA

## R.ENANGTNVYVGIHPSK.V

|    | AA | A       | B       | Y       |    |
|----|----|---------|---------|---------|----|
| 1  | E  | 102.05  | 130.05  | -       | 16 |
| 2  | N  | 216.10  | 244.09  | 1570.80 | 15 |
| 3  | A  | 287.13  | 315.13  | 1456.75 | 14 |
| 4  | N  | 401.18  | 429.17  | 1385.72 | 13 |
| 5  | G  | 458.20  | 486.19  | 1271.67 | 12 |
| 6  | T  | 559.25  | 587.24  | 1214.65 | 11 |
| 7  | N  | 673.29  | 701.28  | 1113.61 | 10 |
| 8  | V  | 772.36  | 800.35  | 999.56  | 9  |
| 9  | Y  | 935.42  | 963.42  | 900.49  | 8  |
| 10 | V  | 1034.49 | 1062.49 | 737.43  | 7  |
| 11 | G  | 1091.51 | 1119.51 | 638.36  | 6  |
| 12 | I  | 1204.60 | 1232.59 | 581.34  | 5  |
| 13 | H  | 1341.65 | 1369.65 | 468.26  | 4  |
| 14 | P  | 1438.71 | 1466.70 | 331.20  | 3  |
| 15 | S  | 1525.74 | 1553.73 | 234.14  | 2  |
| 16 | K  | -       | -       | 147.11  | 1  |

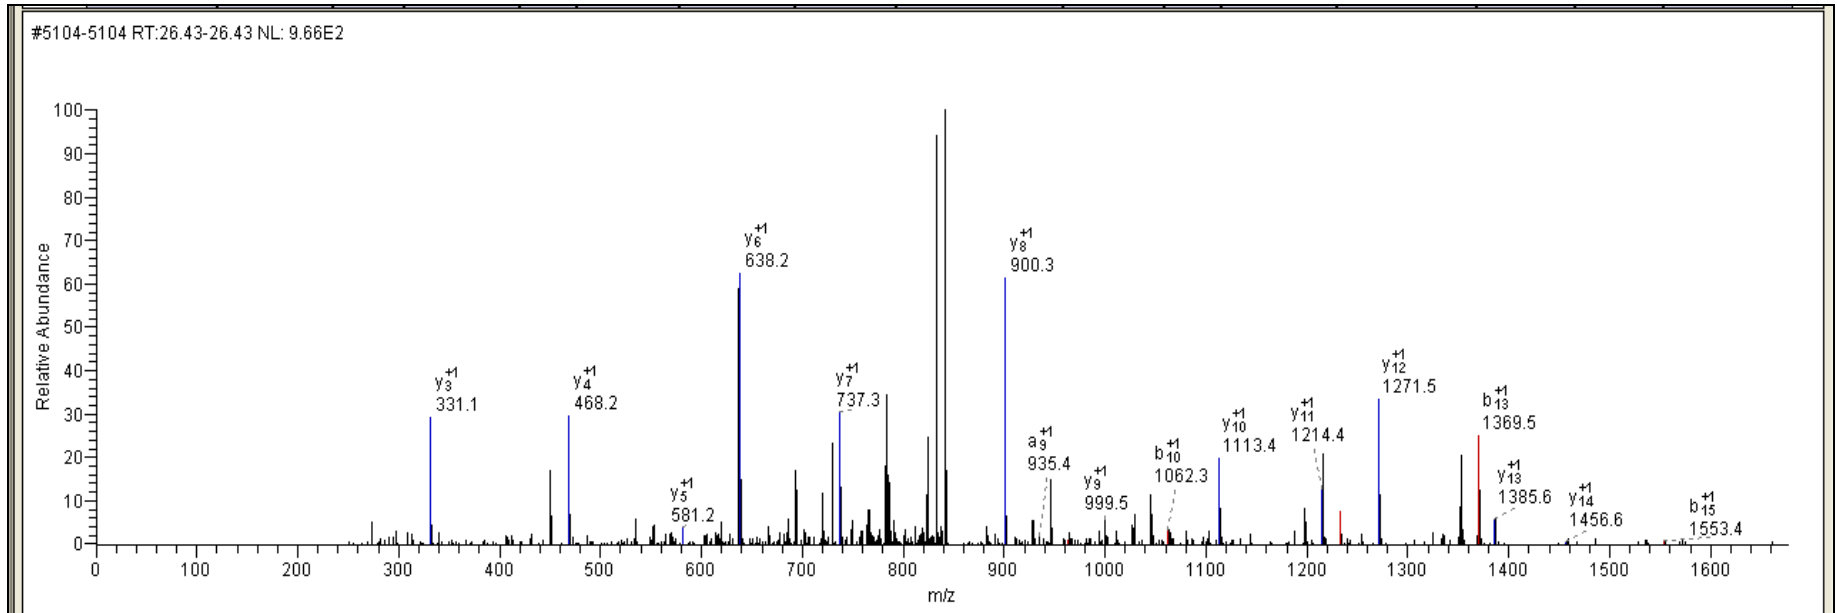

# RpL27A NP\_476963.1 Ribosomal protein L27A CG15442-PA

## R.INFDKYHPGYFGK.V

|    | AA | A       | B       | Y       |    |
|----|----|---------|---------|---------|----|
| 1  | I  | 86.10   | 114.09  | -       | 13 |
| 2  | N  | 200.14  | 228.13  | 1472.70 | 12 |
| 3  | F  | 347.21  | 375.20  | 1358.65 | 11 |
| 4  | D  | 462.23  | 490.23  | 1211.58 | 10 |
| 5  | K  | 590.33  | 618.32  | 1096.56 | 9  |
| 6  | Y  | 753.39  | 781.39  | 968.46  | 8  |
| 7  | H  | 890.45  | 918.45  | 805.40  | 7  |
| 8  | P  | 987.50  | 1015.50 | 668.34  | 6  |
| 9  | G  | 1044.53 | 1072.52 | 571.29  | 5  |
| 10 | Y  | 1207.59 | 1235.58 | 514.27  | 4  |
| 11 | F  | 1354.66 | 1382.65 | 351.20  | 3  |
| 12 | G  | 1411.68 | 1439.67 | 204.13  | 2  |
| 13 | K  | -       | -       | 147.11  | 1  |

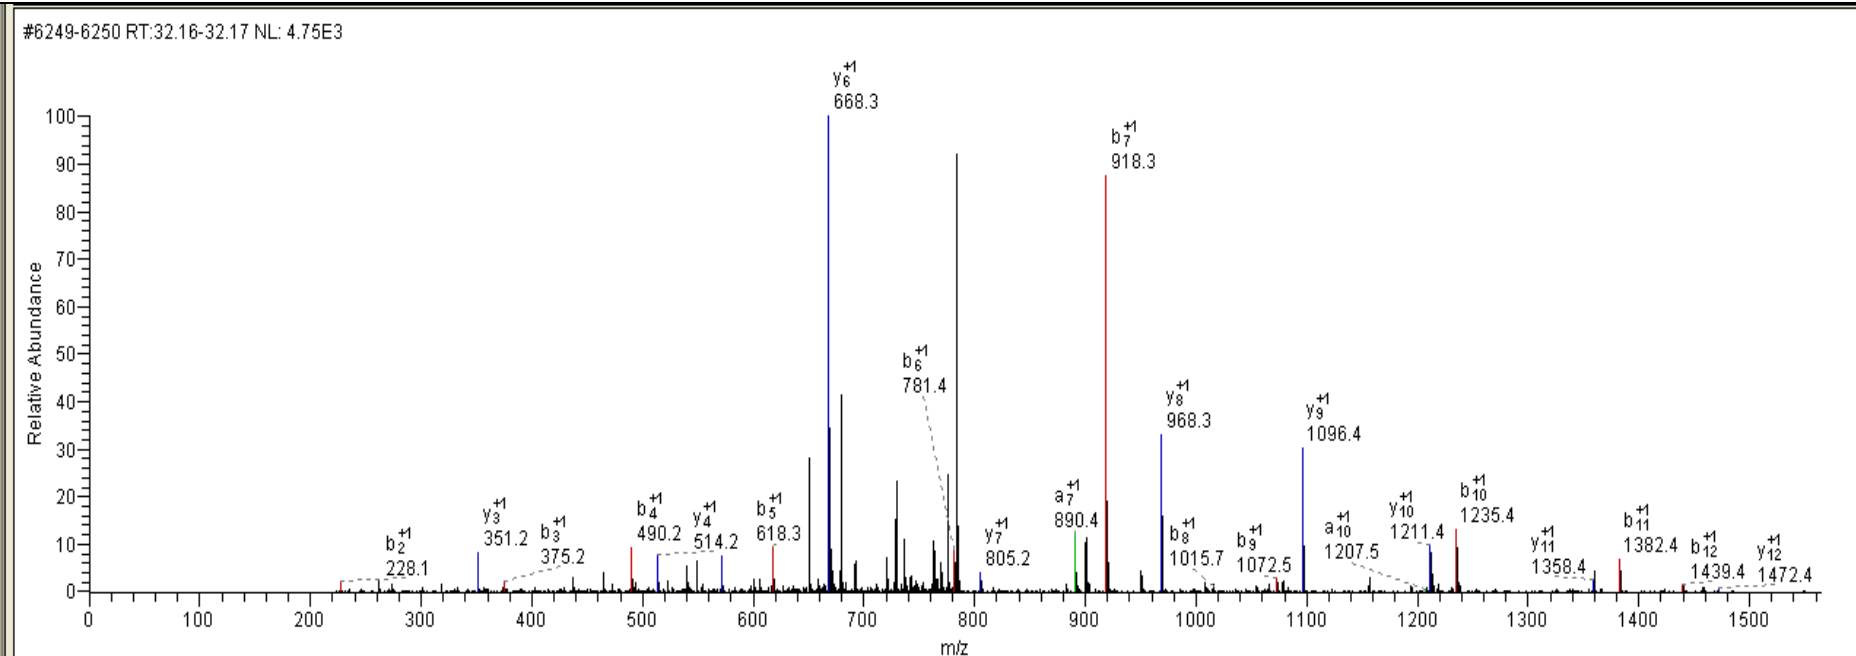



# RpL31 NP\_724805.1 Ribosomal protein L31 CG1821-PC

K.LYTYVTYVPVSTFK.N

|    | AA | A       | B       | Y       |    |
|----|----|---------|---------|---------|----|
| 1  | L  | 86.10   | 114.09  | -       | 14 |
| 2  | Y  | 249.16  | 277.15  | 1567.80 | 13 |
| 3  | T  | 350.21  | 378.20  | 1404.74 | 12 |
| 4  | Y  | 513.27  | 541.27  | 1303.69 | 11 |
| 5  | V  | 612.34  | 640.33  | 1140.63 | 10 |
| 6  | T  | 713.39  | 741.38  | 1041.56 | 9  |
| 7  | Y  | 876.45  | 904.45  | 940.51  | 8  |
| 8  | V  | 975.52  | 1003.51 | 777.45  | 7  |
| 9  | P  | 1072.57 | 1100.57 | 678.38  | 6  |
| 10 | V  | 1171.64 | 1199.63 | 581.33  | 5  |
| 11 | S  | 1258.67 | 1286.67 | 482.26  | 4  |
| 12 | T  | 1359.72 | 1387.71 | 395.23  | 3  |
| 13 | F  | 1506.79 | 1534.78 | 294.18  | 2  |
| 14 | K  | -       | -       | 147.11  | 1  |

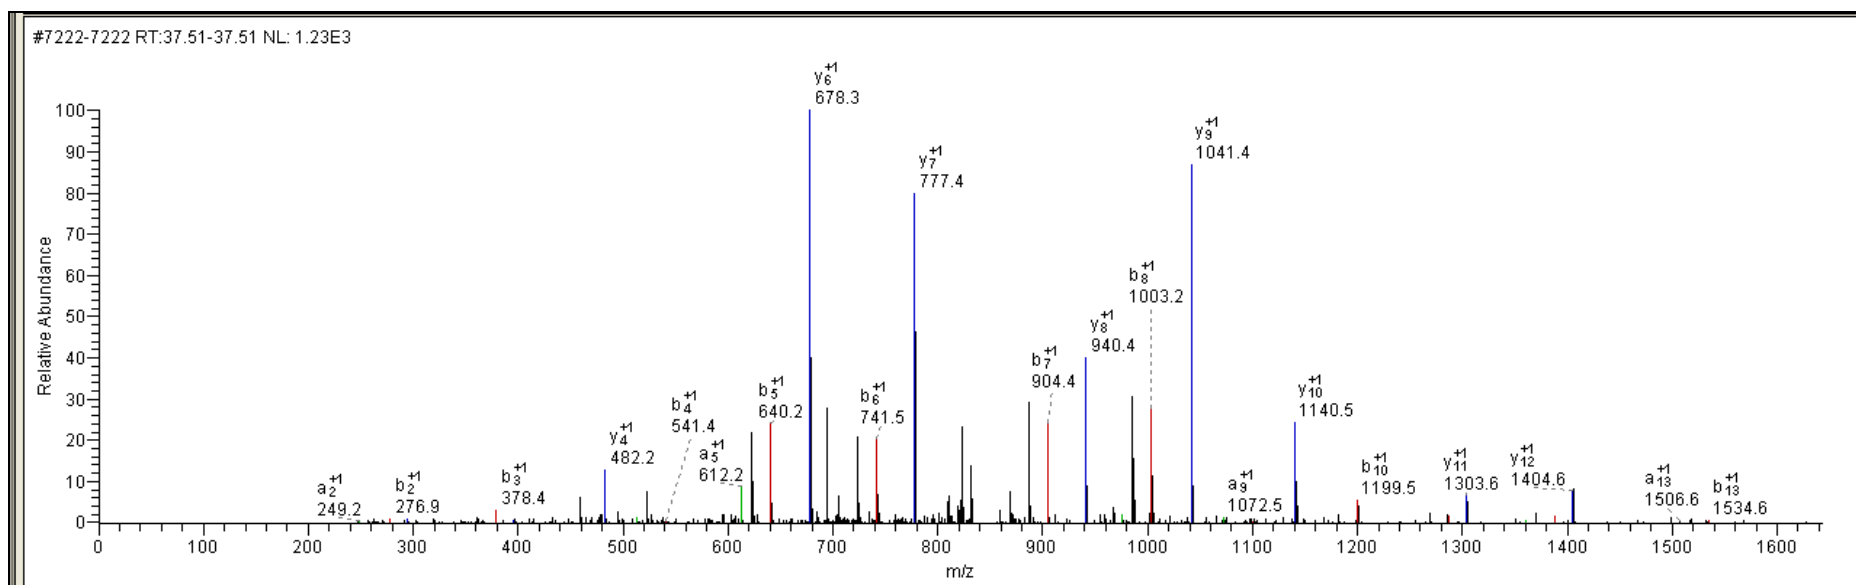

# RpL35 NP\_572243.1 Ribosomal protein L35 CG4111-PB

## K.QLDELKNELLSLR.V

|    | AA | A       | B       | Y       |    |
|----|----|---------|---------|---------|----|
| 1  | Q  | 101.07  | 129.07  | -       | 13 |
| 2  | L  | 214.16  | 242.15  | 1442.82 | 12 |
| 3  | D  | 329.18  | 357.18  | 1329.74 | 11 |
| 4  | E  | 458.22  | 486.22  | 1214.71 | 10 |
| 5  | L  | 571.31  | 599.30  | 1085.67 | 9  |
| 6  | K  | 699.40  | 727.40  | 972.58  | 8  |
| 7  | N  | 813.45  | 841.44  | 844.49  | 7  |
| 8  | E  | 942.49  | 970.48  | 730.45  | 6  |
| 9  | L  | 1055.57 | 1083.57 | 601.40  | 5  |
| 10 | L  | 1168.66 | 1196.65 | 488.32  | 4  |
| 11 | S  | 1255.69 | 1283.68 | 375.24  | 3  |
| 12 | L  | 1368.77 | 1396.77 | 288.20  | 2  |
| 13 | R  | -       | -       | 175.12  | 1  |

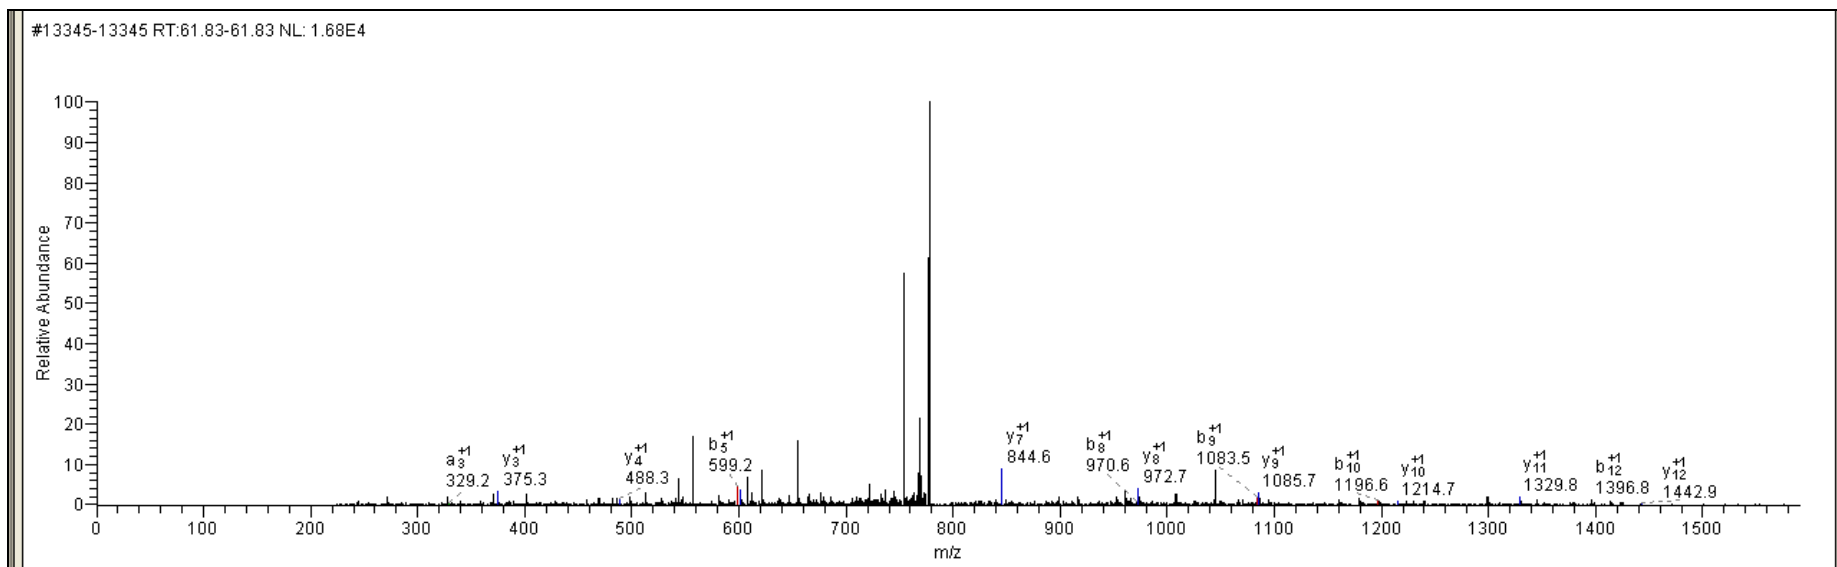

Supplement: supp_M110.001362_mcp.M110.001362-5.pdf [file supp_M110.001362_mcp.M110.001362-5.pdf]
