# Supplementary material
Source: PubMed Central journal article supplement (PMC2938118)

RpL35A NP\_649539.1 Ribosomal protein L35A CG2099-PA

R.NQHENQAILKIEGAR.R

|    | AA | A       | B       | Y       |    |
|----|----|---------|---------|---------|----|
| 1  | N  | 87.06   | 115.05  | -       | 15 |
| 2  | Q  | 215.11  | 243.11  | 1606.87 | 14 |
| 3  | H  | 352.17  | 380.17  | 1478.81 | 13 |
| 4  | E  | 481.22  | 509.21  | 1341.75 | 12 |
| 5  | N  | 595.26  | 623.25  | 1212.71 | 11 |
| 6  | Q  | 723.32  | 751.31  | 1098.66 | 10 |
| 7  | A  | 794.35  | 822.35  | 970.60  | 9  |
| 8  | I  | 907.44  | 935.43  | 899.57  | 8  |
| 9  | L  | 1020.52 | 1048.52 | 786.48  | 7  |
| 10 | K  | 1148.62 | 1176.61 | 673.40  | 6  |
| 11 | I  | 1261.70 | 1289.70 | 545.30  | 5  |
| 12 | E  | 1390.74 | 1418.74 | 432.22  | 4  |
| 13 | G  | 1447.77 | 1475.76 | 303.18  | 3  |
| 14 | A  | 1518.80 | 1546.80 | 246.16  | 2  |
| 15 | R  | -       | -       | 175.12  | 1  |

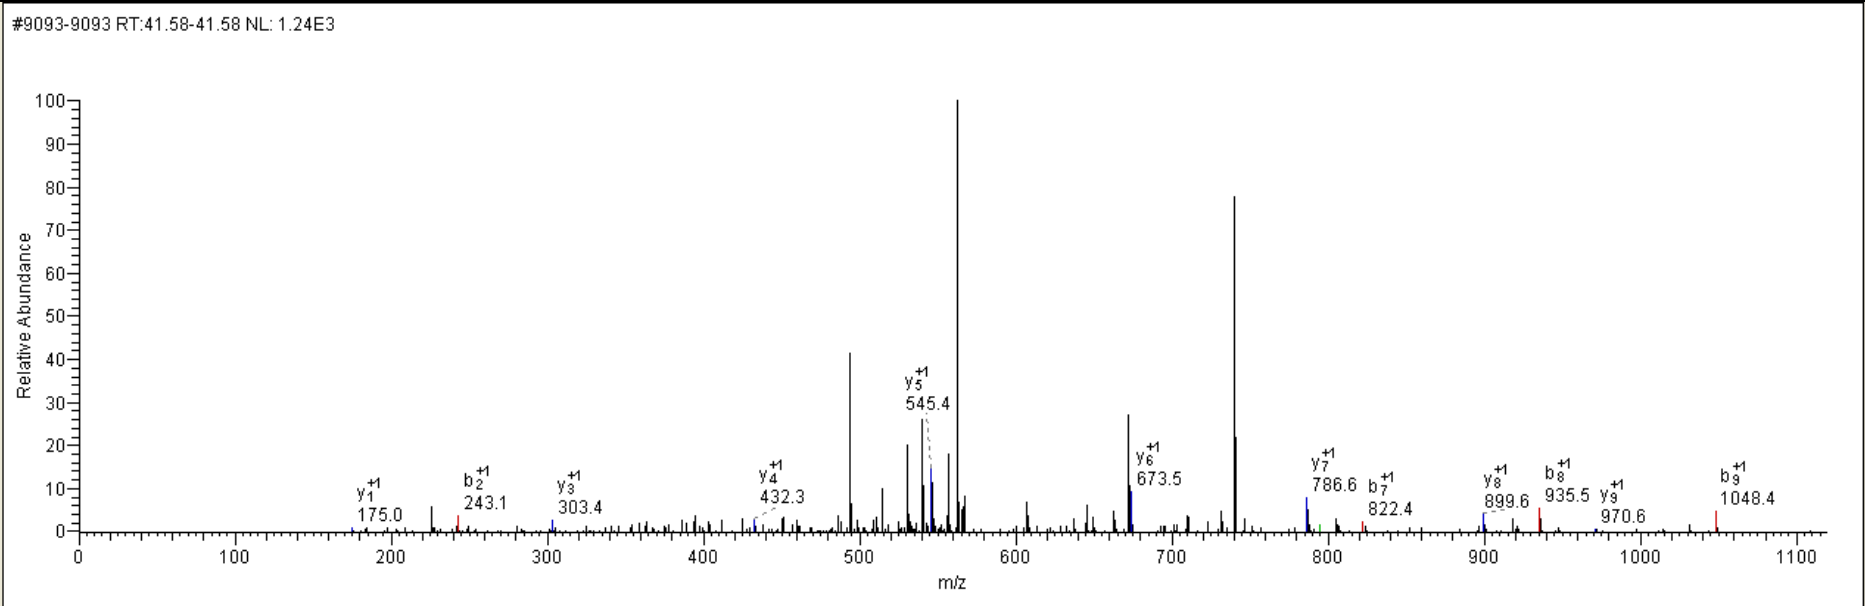

# RpL36 NP\_476629.1 Ribosomal protein L36 CG7622-PA

## R.YELAIGLNKGHK.T

|    | AA | A       | B       | Y       |    |
|----|----|---------|---------|---------|----|
| 1  | Y  | 136.08  | 164.07  | -       | 12 |
| 2  | E  | 265.12  | 293.11  | 1179.68 | 11 |
| 3  | L  | 378.20  | 406.20  | 1050.64 | 10 |
| 4  | A  | 449.24  | 477.23  | 937.56  | 9  |
| 5  | I  | 562.32  | 590.32  | 866.52  | 8  |
| 6  | G  | 619.34  | 647.34  | 753.44  | 7  |
| 7  | L  | 732.43  | 760.42  | 696.42  | 6  |
| 8  | N  | 846.47  | 874.47  | 583.33  | 5  |
| 9  | K  | 974.57  | 1002.56 | 469.29  | 4  |
| 10 | G  | 1031.59 | 1059.58 | 341.19  | 3  |
| 11 | H  | 1168.65 | 1196.64 | 284.17  | 2  |
| 12 | K  | -       | -       | 147.11  | 1  |

#5632-5632 RT:29.17-29.17 NL: 1.80E3

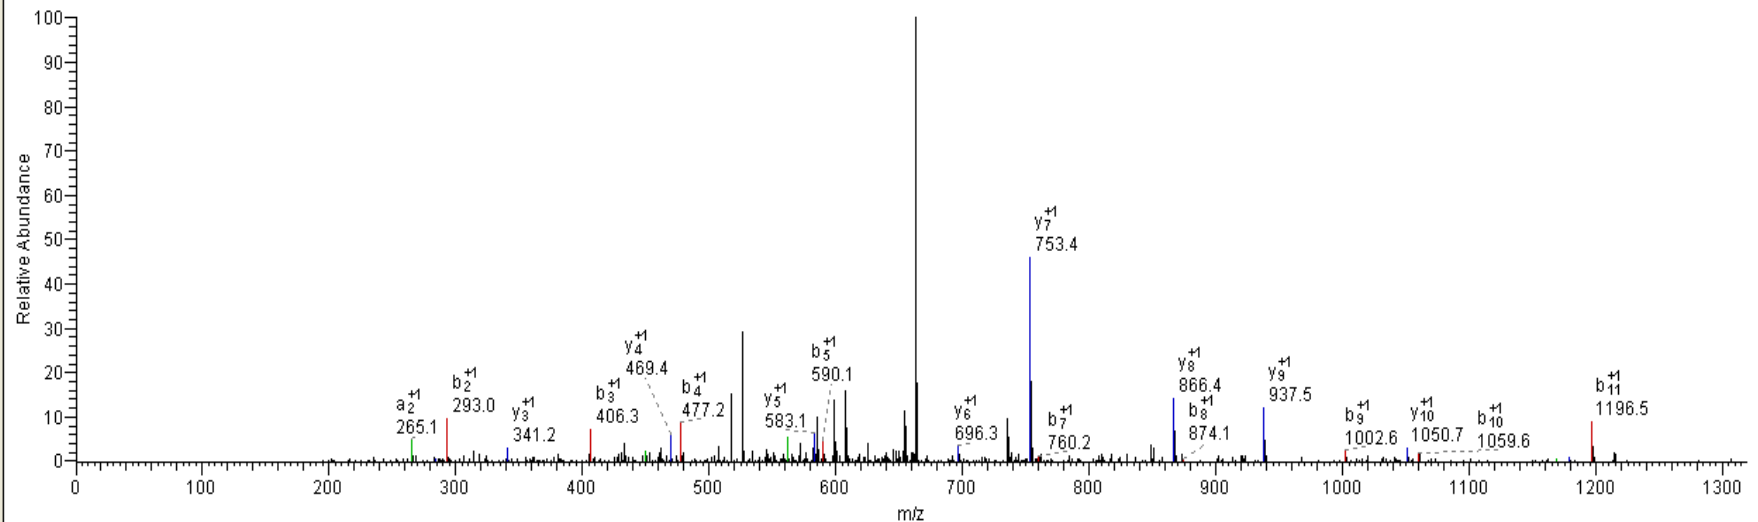

# RpLPO NP\_524211.1 Ribosomal protein LPO CG7490-PA

## K.NLLAIAATTEVEFKEATTIK.E

|    | AA | A       | B       | Y       |    |
|----|----|---------|---------|---------|----|
| 1  | N  | 87.06   | 115.05  | -       | 20 |
| 2  | L  | 200.14  | 228.13  | 2049.15 | 19 |
| 3  | L  | 313.22  | 341.22  | 1936.06 | 18 |
| 4  | A  | 384.26  | 412.26  | 1822.98 | 17 |
| 5  | I  | 497.34  | 525.34  | 1751.94 | 16 |
| 6  | A  | 568.38  | 596.38  | 1638.86 | 15 |
| 7  | A  | 639.42  | 667.41  | 1567.82 | 14 |
| 8  | T  | 740.47  | 768.46  | 1496.78 | 13 |
| 9  | T  | 841.51  | 869.51  | 1395.74 | 12 |
| 10 | E  | 970.56  | 998.55  | 1294.69 | 11 |
| 11 | V  | 1069.63 | 1097.62 | 1165.65 | 10 |
| 12 | E  | 1198.67 | 1226.66 | 1066.58 | 9  |
| 13 | F  | 1345.74 | 1373.73 | 937.54  | 8  |
| 14 | K  | 1473.83 | 1501.83 | 790.47  | 7  |
| 15 | E  | 1602.87 | 1630.87 | 662.37  | 6  |
| 16 | A  | 1673.91 | 1701.91 | 533.33  | 5  |
| 17 | T  | 1774.96 | 1802.95 | 462.29  | 4  |
| 18 | T  | 1876.01 | 1904.00 | 361.24  | 3  |
| 19 | I  | 1989.09 | 2017.09 | 260.20  | 2  |
| 20 | K  | -       | -       | 147.11  | 1  |

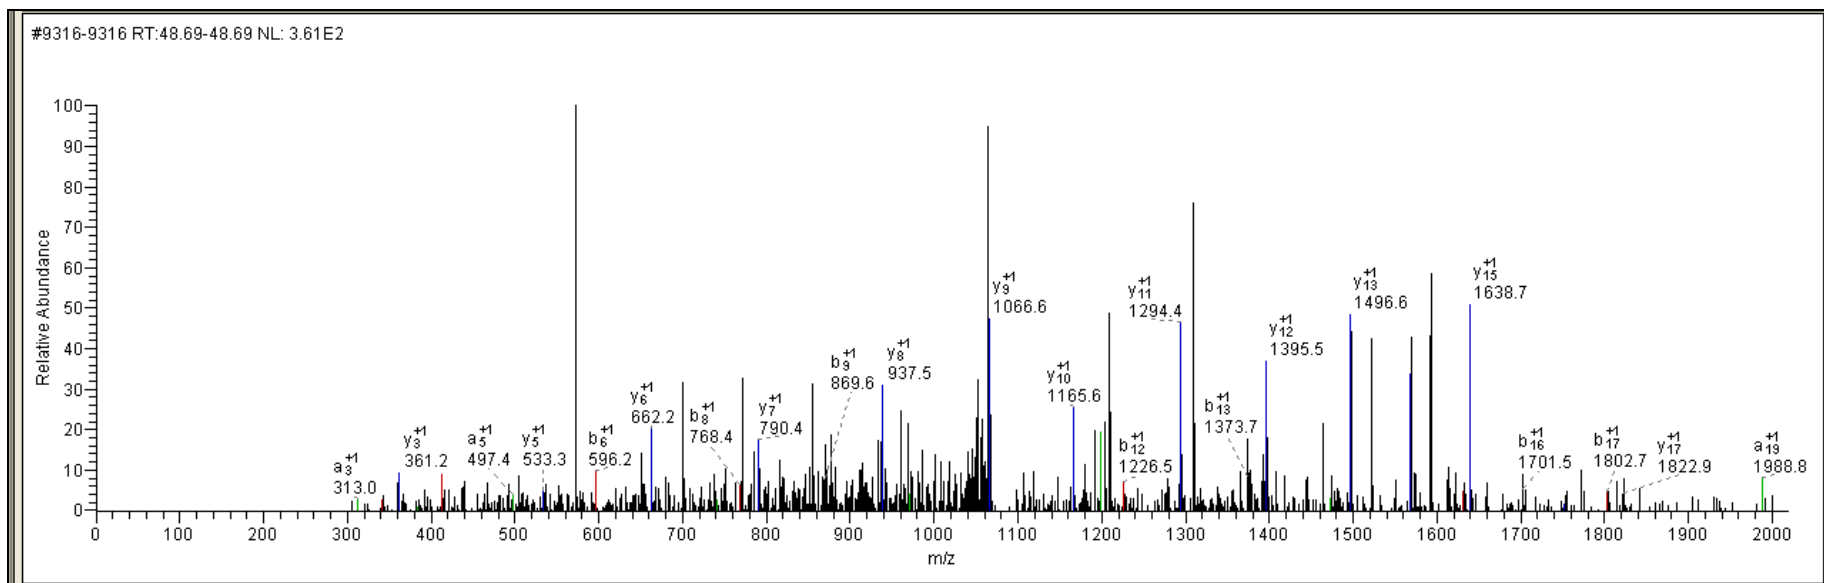

RpS10b NP\_728273.1 Ribosomal protein S10b CG14206-PB

K.GDVGPGAGEVEFR.G

|    | AA | A       | B       | Y       |    |
|----|----|---------|---------|---------|----|
| 1  | G  | 30.03   | 58.03   | -       | 13 |
| 2  | D  | 145.06  | 173.06  | 1232.59 | 12 |
| 3  | V  | 244.13  | 272.12  | 1117.56 | 11 |
| 4  | G  | 301.15  | 329.15  | 1018.50 | 10 |
| 5  | P  | 398.20  | 426.20  | 961.47  | 9  |
| 6  | G  | 455.22  | 483.22  | 864.42  | 8  |
| 7  | A  | 526.26  | 554.26  | 807.40  | 7  |
| 8  | G  | 583.28  | 611.28  | 736.36  | 6  |
| 9  | E  | 712.33  | 740.32  | 679.34  | 5  |
| 10 | V  | 811.39  | 839.39  | 550.30  | 4  |
| 11 | E  | 940.44  | 968.43  | 451.23  | 3  |
| 12 | F  | 1087.51 | 1115.50 | 322.19  | 2  |
| 13 | R  | -       | -       | 175.12  | 1  |

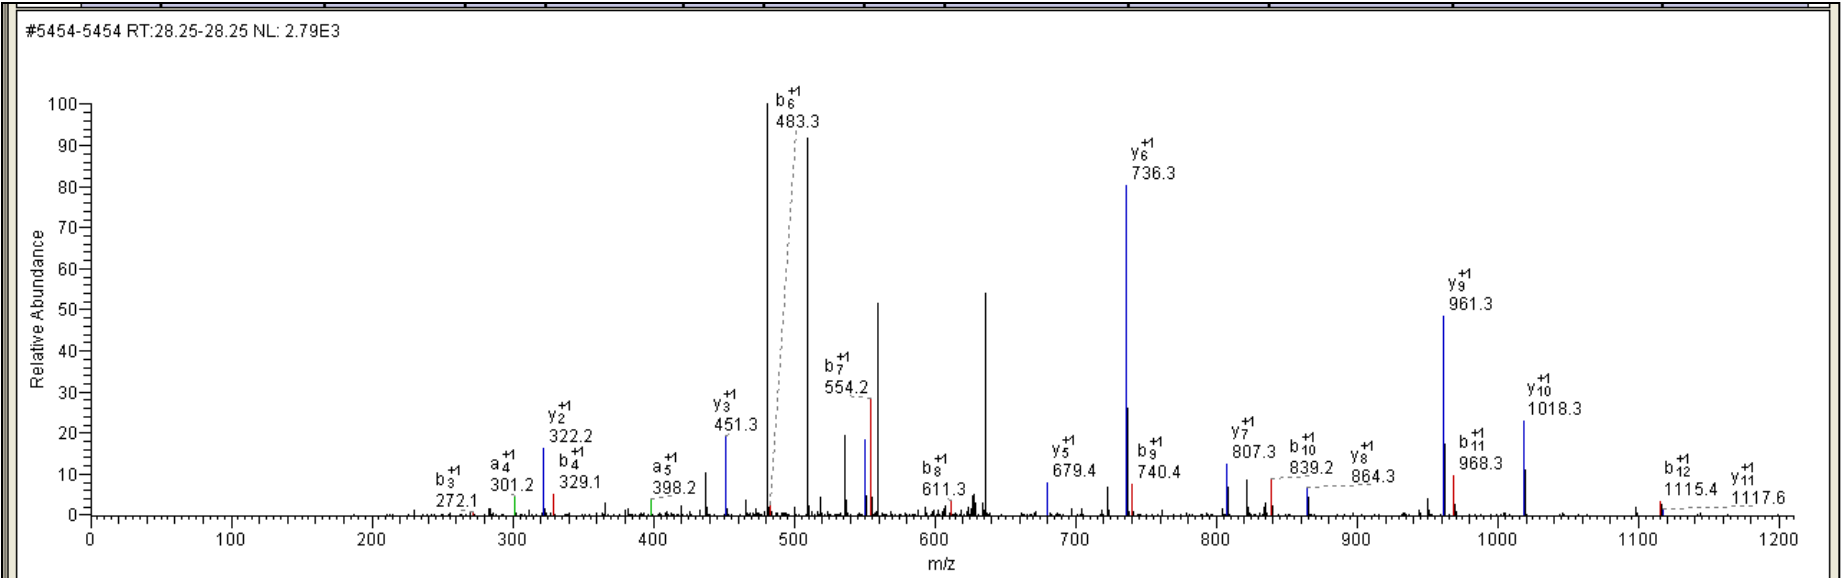

# RpS14a NP\_524884.1 Ribosomal protein S14a CG1524-PB

## K.VQKEEVQVQLGPQVR.D

|    | AA | A       | B       | Y       |    |
|----|----|---------|---------|---------|----|
| 1  | V  | 72.08   | 100.08  | -       | 15 |
| 2  | Q  | 200.14  | 228.13  | 1637.90 | 14 |
| 3  | K  | 328.23  | 356.23  | 1509.84 | 13 |
| 4  | E  | 457.28  | 485.27  | 1381.74 | 12 |
| 5  | E  | 586.32  | 614.31  | 1252.70 | 11 |
| 6  | V  | 685.39  | 713.38  | 1123.66 | 10 |
| 7  | Q  | 813.45  | 841.44  | 1024.59 | 9  |
| 8  | V  | 912.51  | 940.51  | 896.53  | 8  |
| 9  | Q  | 1040.57 | 1068.57 | 797.46  | 7  |
| 10 | L  | 1153.66 | 1181.65 | 669.40  | 6  |
| 11 | G  | 1210.68 | 1238.67 | 556.32  | 5  |
| 12 | P  | 1307.73 | 1335.73 | 499.30  | 4  |
| 13 | Q  | 1435.79 | 1463.79 | 402.25  | 3  |
| 14 | V  | 1534.86 | 1562.85 | 274.19  | 2  |
| 15 | R  | -       | -       | 175.12  | 1  |

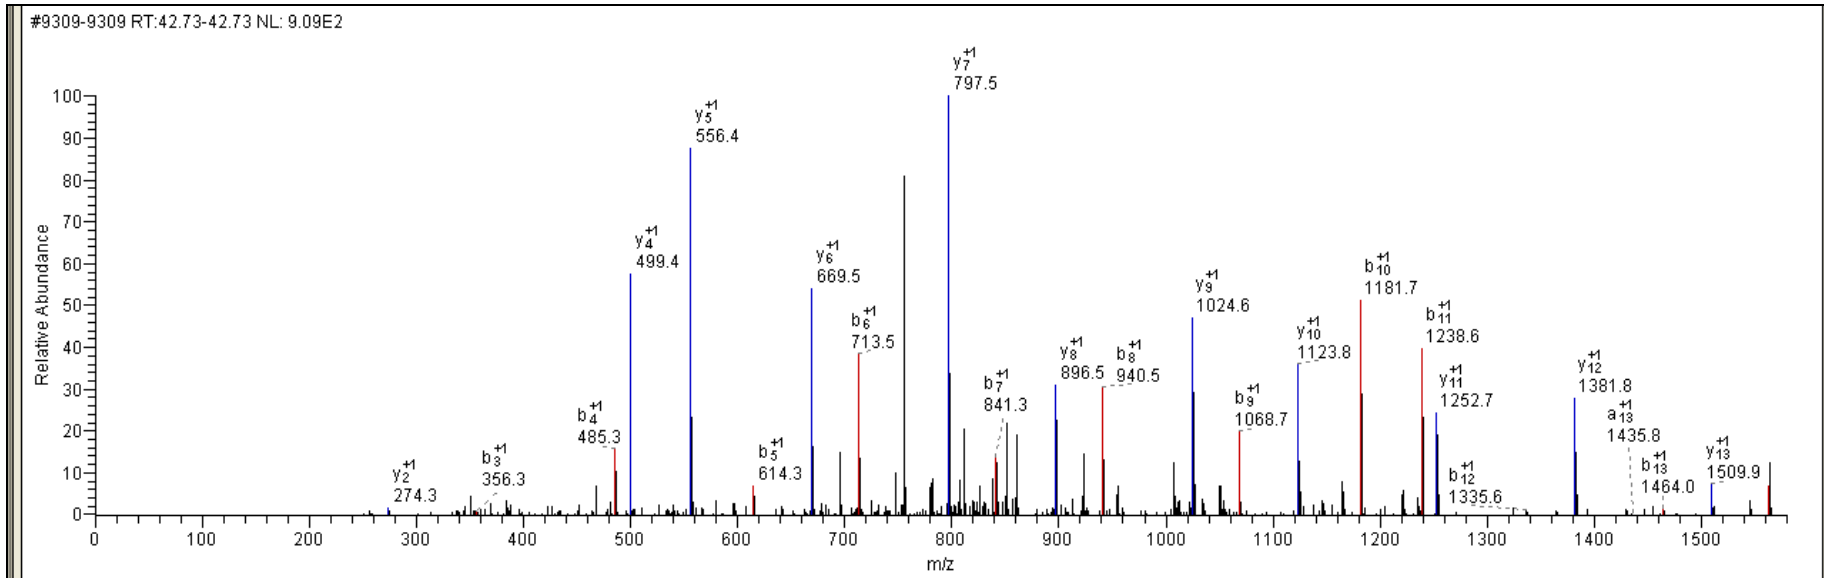

# RpS15 NP\_611136.1 Ribosomal protein S15 CG8332-PA

## K.HGRPGIGATHSSR.F

|    | AA | A       | B       | Y       |    |
|----|----|---------|---------|---------|----|
| 1  | H  | 110.07  | 138.07  | -       | 13 |
| 2  | G  | 167.09  | 195.09  | 1195.63 | 12 |
| 3  | R  | 323.19  | 351.19  | 1138.61 | 11 |
| 4  | P  | 420.25  | 448.24  | 982.51  | 10 |
| 5  | G  | 477.27  | 505.26  | 885.45  | 9  |
| 6  | I  | 590.35  | 618.35  | 828.43  | 8  |
| 7  | G  | 647.37  | 675.37  | 715.35  | 7  |
| 8  | A  | 718.41  | 746.41  | 658.33  | 6  |
| 9  | T  | 819.46  | 847.45  | 587.29  | 5  |
| 10 | H  | 956.52  | 984.51  | 486.24  | 4  |
| 11 | S  | 1043.55 | 1071.54 | 349.18  | 3  |
| 12 | S  | 1130.58 | 1158.58 | 262.15  | 2  |
| 13 | R  | -       | -       | 175.12  | 1  |

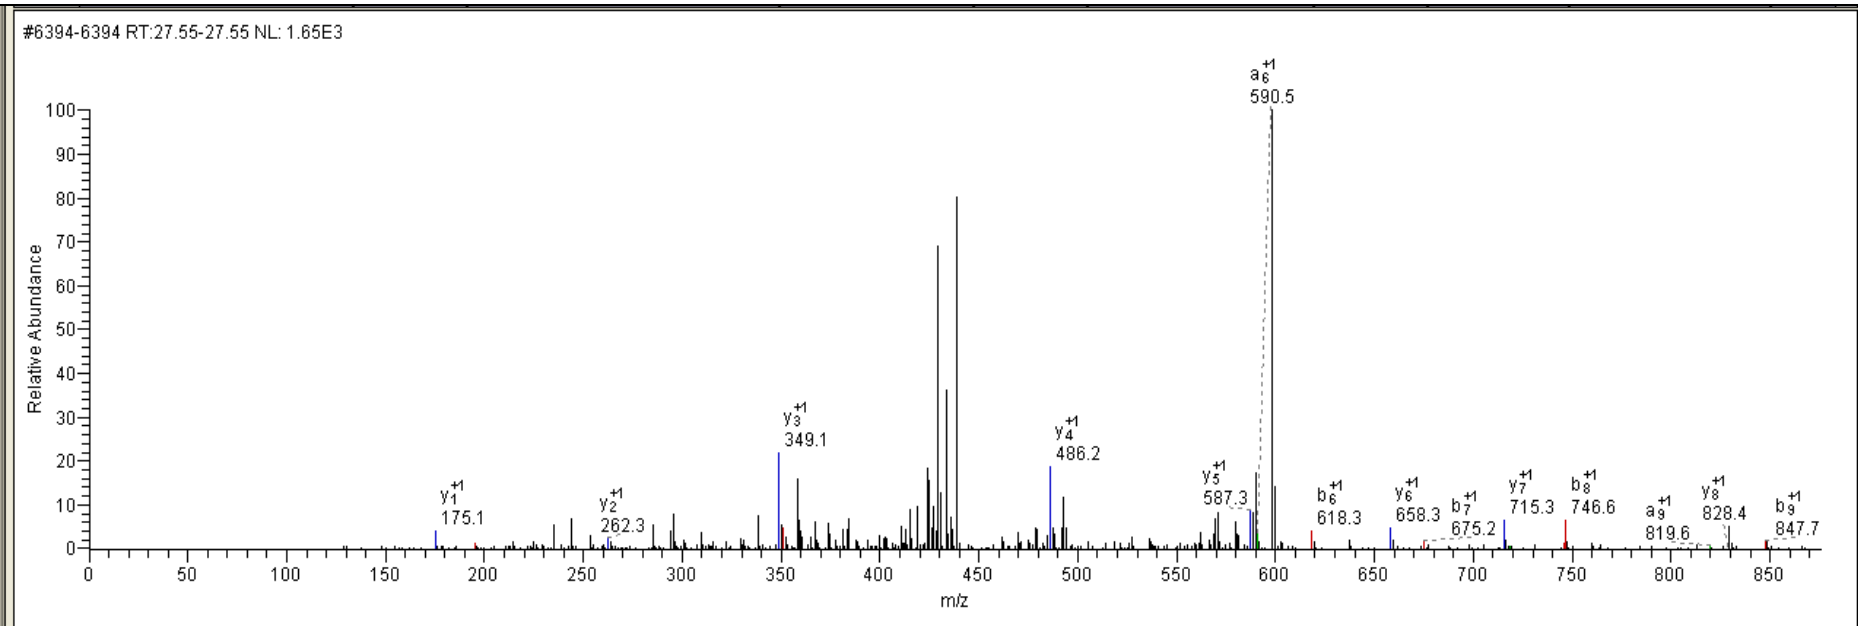

# RpS15Aa NP\_727692.1 Ribosomal protein S15Aa CG2033-PC

## R.FDVPINDIEKWTNNLLPSR.Q

|    | AA | A       | B       | Y       |    |
|----|----|---------|---------|---------|----|
| 1  | F  | 120.08  | 148.08  | -       | 19 |
| 2  | D  | 235.11  | 263.10  | 2124.11 | 18 |
| 3  | V  | 334.18  | 362.17  | 2009.08 | 17 |
| 4  | P  | 431.23  | 459.22  | 1910.01 | 16 |
| 5  | I  | 544.31  | 572.31  | 1812.96 | 15 |
| 6  | N  | 658.36  | 686.35  | 1699.88 | 14 |
| 7  | D  | 773.38  | 801.38  | 1585.83 | 13 |
| 8  | I  | 886.47  | 914.46  | 1470.81 | 12 |
| 9  | E  | 1015.51 | 1043.50 | 1357.72 | 11 |
| 10 | K  | 1143.60 | 1171.60 | 1228.68 | 10 |
| 11 | WV | 1329.68 | 1357.68 | 1100.58 | 9  |
| 12 | T  | 1430.73 | 1458.73 | 914.51  | 8  |
| 13 | N  | 1544.77 | 1572.77 | 813.46  | 7  |
| 14 | N  | 1658.82 | 1686.81 | 699.41  | 6  |
| 15 | L  | 1771.90 | 1799.90 | 585.37  | 5  |
| 16 | L  | 1884.99 | 1912.98 | 472.29  | 4  |
| 17 | P  | 1982.04 | 2010.03 | 359.20  | 3  |
| 18 | S  | 2069.07 | 2097.07 | 262.15  | 2  |
| 19 | R  | -       | -       | 175.12  | 1  |

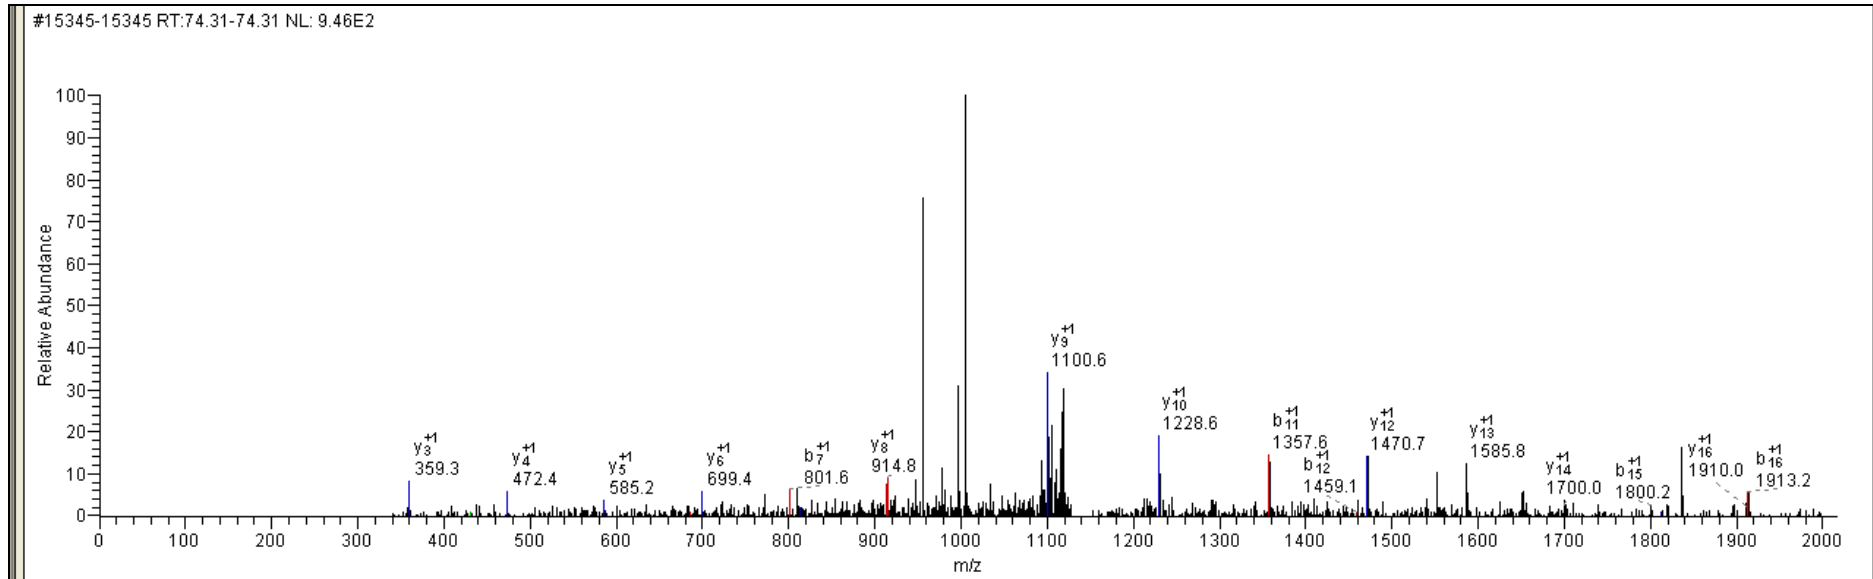

# RpS16 NP\_611685.1 Ribosomal protein S16 CG4046-PA

## R.VSGGGHVAQIYAIR.Q

|    | AA | A       | B       | Y       |    |
|----|----|---------|---------|---------|----|
| 1  | V  | 72.08   | 100.08  | -       | 14 |
| 2  | S  | 159.11  | 187.11  | 1328.71 | 13 |
| 3  | G  | 216.13  | 244.13  | 1241.67 | 12 |
| 4  | G  | 273.16  | 301.15  | 1184.65 | 11 |
| 5  | G  | 330.18  | 358.17  | 1127.63 | 10 |
| 6  | H  | 467.24  | 495.23  | 1070.61 | 9  |
| 7  | V  | 566.30  | 594.30  | 933.55  | 8  |
| 8  | A  | 637.34  | 665.34  | 834.48  | 7  |
| 9  | Q  | 765.40  | 793.40  | 763.45  | 6  |
| 10 | I  | 878.48  | 906.48  | 635.39  | 5  |
| 11 | Y  | 1041.55 | 1069.54 | 522.30  | 4  |
| 12 | A  | 1112.58 | 1140.58 | 359.24  | 3  |
| 13 | I  | 1225.67 | 1253.66 | 288.20  | 2  |
| 14 | R  | -       | -       | 175.12  | 1  |

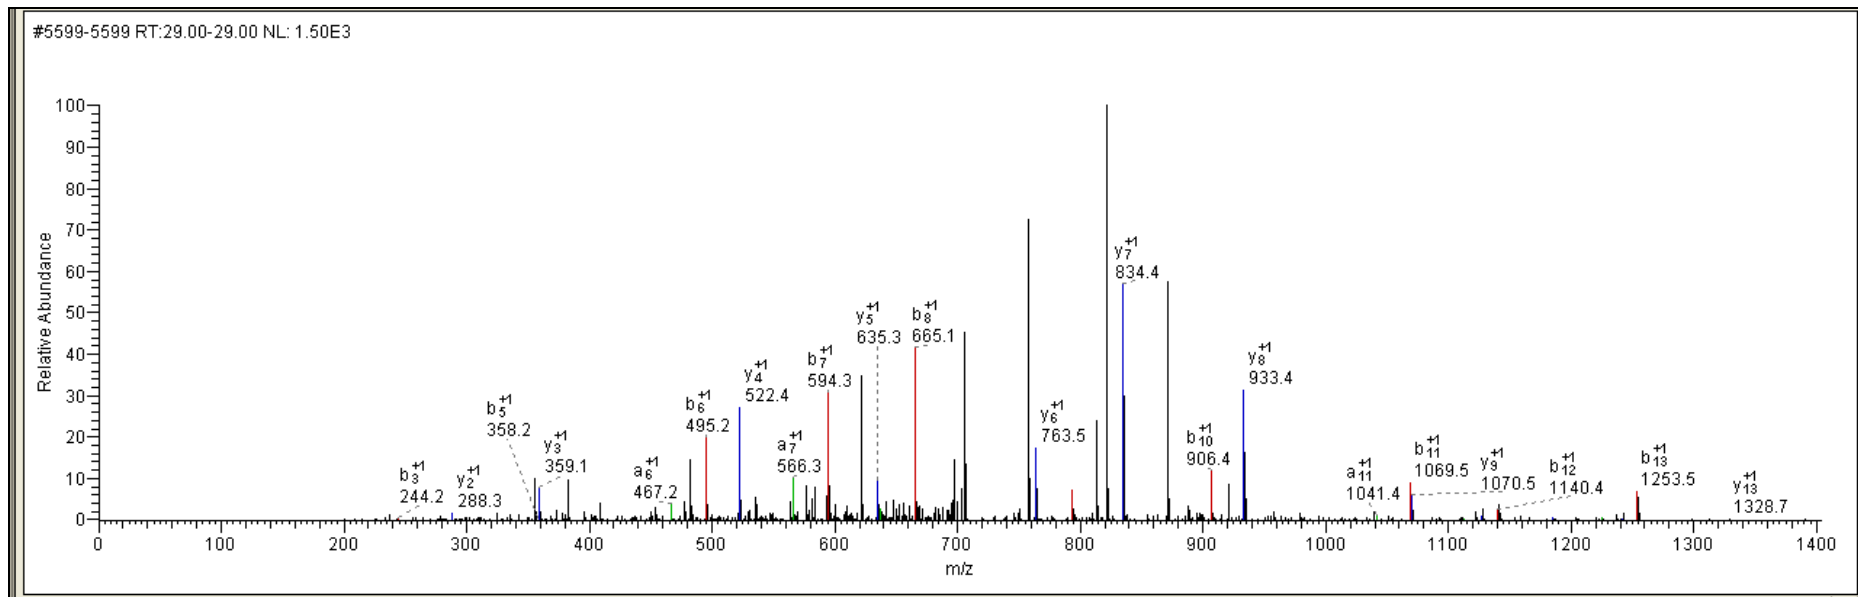



# RpS18 NP\_725943.1 Ribosomal protein S18 CG8900-PB

## K.DIIDGKYWQLTSSNLDISK.L

|    | AA | A       | B       | Y       |    |
|----|----|---------|---------|---------|----|
| 1  | D  | 88.04   | 116.03  | -       | 18 |
| 2  | I  | 201.12  | 229.12  | 1968.01 | 17 |
| 3  | I  | 314.21  | 342.20  | 1854.92 | 16 |
| 4  | D  | 429.23  | 457.23  | 1741.84 | 15 |
| 5  | G  | 486.26  | 514.25  | 1626.81 | 14 |
| 6  | K  | 614.35  | 642.35  | 1569.79 | 13 |
| 7  | Y  | 777.41  | 805.41  | 1441.70 | 12 |
| 8  | W  | 963.49  | 991.49  | 1278.63 | 11 |
| 9  | Q  | 1091.55 | 1119.55 | 1092.55 | 10 |
| 10 | L  | 1204.64 | 1232.63 | 964.49  | 9  |
| 11 | T  | 1305.68 | 1333.68 | 851.41  | 8  |
| 12 | S  | 1392.72 | 1420.71 | 750.36  | 7  |
| 13 | S  | 1479.75 | 1507.74 | 663.33  | 6  |
| 14 | N  | 1593.79 | 1621.79 | 576.30  | 5  |
| 15 | L  | 1706.87 | 1734.87 | 462.26  | 4  |
| 16 | D  | 1821.90 | 1849.90 | 349.17  | 3  |
| 17 | S  | 1908.93 | 1936.93 | 234.14  | 2  |
| 18 | K  | -       | -       | 147.11  | 1  |

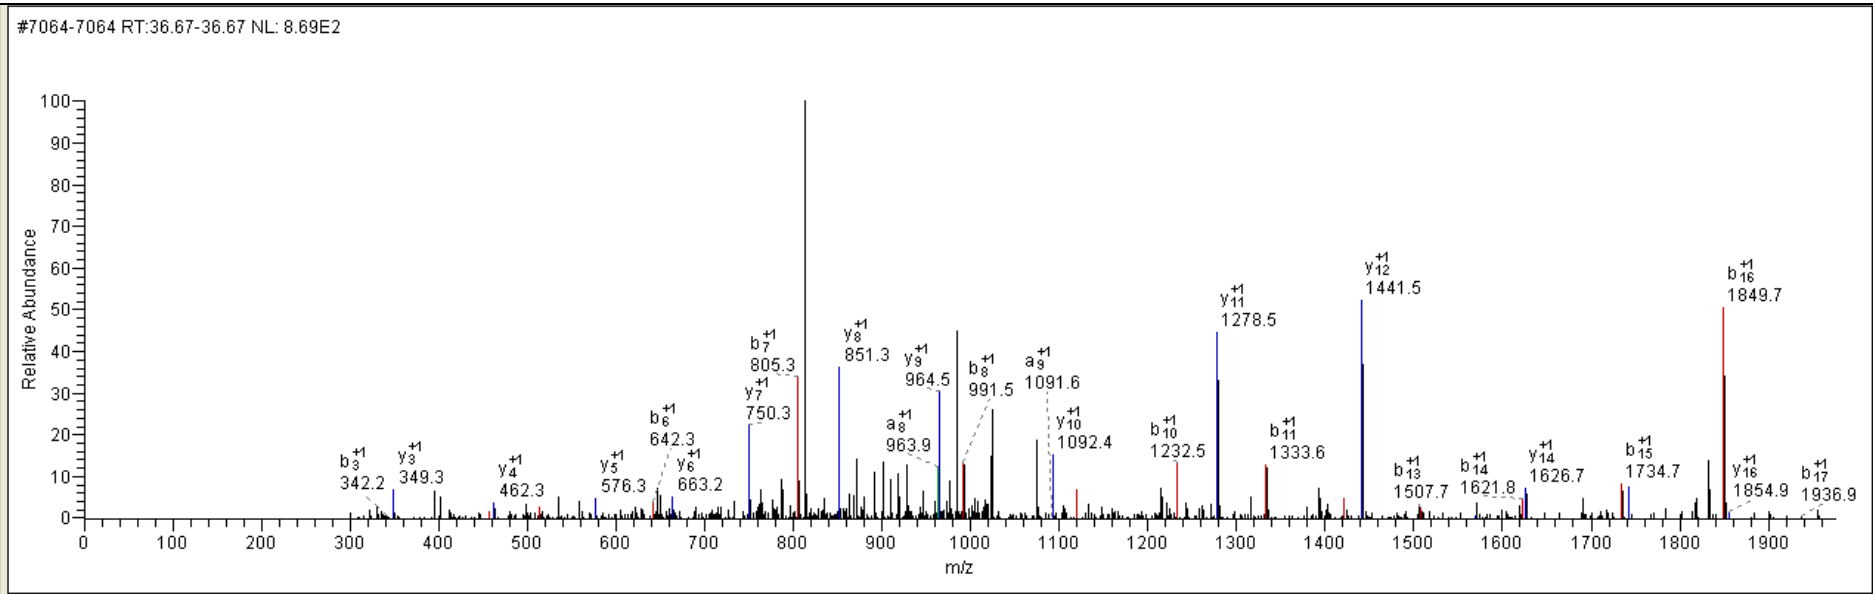

# RpS24 NP\_611693.1 Ribosomal protein S24 CG3751-PA

## R.STGFALIYDTLDFAK.K

|    | AA | A       | B       | Y       |    |
|----|----|---------|---------|---------|----|
| 1  | S  | 60.04   | 88.04   | -       | 15 |
| 2  | T  | 161.09  | 189.09  | 1574.81 | 14 |
| 3  | G  | 218.11  | 246.11  | 1473.76 | 13 |
| 4  | F  | 365.18  | 393.18  | 1416.74 | 12 |
| 5  | A  | 436.22  | 464.21  | 1269.67 | 11 |
| 6  | L  | 549.30  | 577.30  | 1198.64 | 10 |
| 7  | I  | 662.39  | 690.38  | 1085.55 | 9  |
| 8  | Y  | 825.45  | 853.45  | 972.47  | 8  |
| 9  | D  | 940.48  | 968.47  | 809.40  | 7  |
| 10 | T  | 1041.53 | 1069.52 | 694.38  | 6  |
| 11 | L  | 1154.61 | 1182.60 | 593.33  | 5  |
| 12 | D  | 1269.64 | 1297.63 | 480.25  | 4  |
| 13 | F  | 1416.70 | 1444.70 | 365.22  | 3  |
| 14 | A  | 1487.74 | 1515.74 | 218.15  | 2  |
| 15 | K  | -       | -       | 147.11  | 1  |

#16112-16112 RT:74.36-74.36 NL: 1.81E4

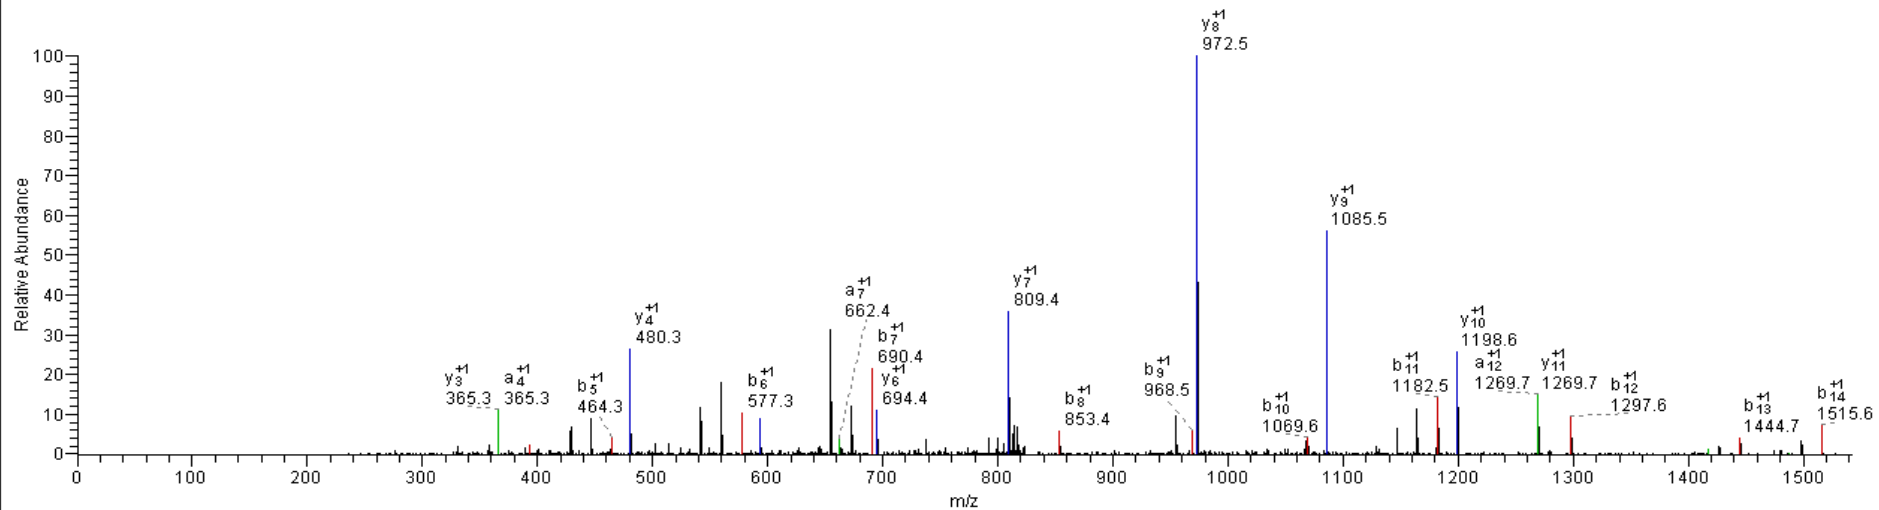

rl NP\_001015122.1 rolled CG12559-PC

K.LFPNADALALDLLGK.M

|    | AA | A       | B       | Y       |    |
|----|----|---------|---------|---------|----|
| 1  | L  | 86.10   | 114.09  | -       | 15 |
| 2  | F  | 233.16  | 261.16  | 1457.80 | 14 |
| 3  | P  | 330.22  | 358.21  | 1310.73 | 13 |
| 4  | N  | 444.26  | 472.26  | 1213.68 | 12 |
| 5  | A  | 515.30  | 543.29  | 1099.64 | 11 |
| 6  | D  | 630.32  | 658.32  | 1028.60 | 10 |
| 7  | A  | 701.36  | 729.36  | 913.57  | 9  |
| 8  | L  | 814.45  | 842.44  | 842.53  | 8  |
| 9  | A  | 885.48  | 913.48  | 729.45  | 7  |
| 10 | L  | 998.57  | 1026.56 | 658.41  | 6  |
| 11 | D  | 1113.59 | 1141.59 | 545.33  | 5  |
| 12 | L  | 1226.68 | 1254.67 | 430.30  | 4  |
| 13 | L  | 1339.76 | 1367.76 | 317.22  | 3  |
| 14 | G  | 1396.78 | 1424.78 | 204.13  | 2  |
| 15 | K  | -       | -       | 147.11  | 1  |

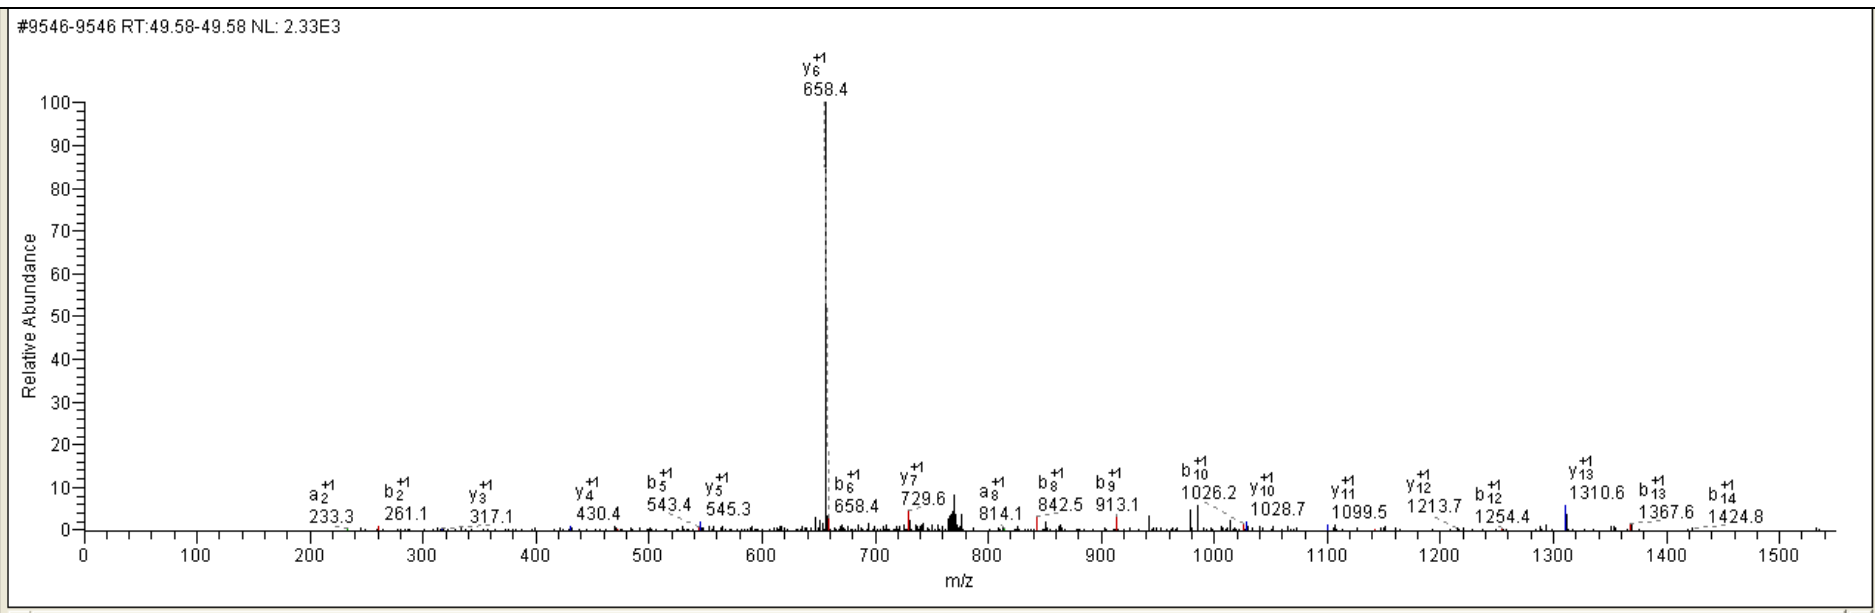

# Rpn12 NP\_648904.1 Rpn12 CG4157-PA

## K.ELLPSEELAEQVLSYAR.D

|    | AA | A       | B       | Y       |    |
|----|----|---------|---------|---------|----|
| 1  | E  | 102.05  | 130.05  | -       | 17 |
| 2  | L  | 215.14  | 243.13  | 1817.96 | 16 |
| 3  | L  | 328.22  | 356.22  | 1704.88 | 15 |
| 4  | P  | 425.28  | 453.27  | 1591.80 | 14 |
| 5  | S  | 512.31  | 540.30  | 1494.74 | 13 |
| 6  | E  | 641.35  | 669.35  | 1407.71 | 12 |
| 7  | E  | 770.39  | 798.39  | 1278.67 | 11 |
| 8  | L  | 883.48  | 911.47  | 1149.63 | 10 |
| 9  | A  | 954.51  | 982.51  | 1036.54 | 9  |
| 10 | E  | 1083.56 | 1111.55 | 965.51  | 8  |
| 11 | Q  | 1211.62 | 1239.61 | 836.46  | 7  |
| 12 | V  | 1310.68 | 1338.68 | 708.40  | 6  |
| 13 | L  | 1423.77 | 1451.76 | 609.34  | 5  |
| 14 | S  | 1510.80 | 1538.79 | 496.25  | 4  |
| 15 | Y  | 1673.86 | 1701.86 | 409.22  | 3  |
| 16 | A  | 1744.90 | 1772.90 | 246.16  | 2  |
| 17 | R  | -       | -       | 175.12  | 1  |

#9102-9102 RT:47.57-47.57 NL: 2.87E3

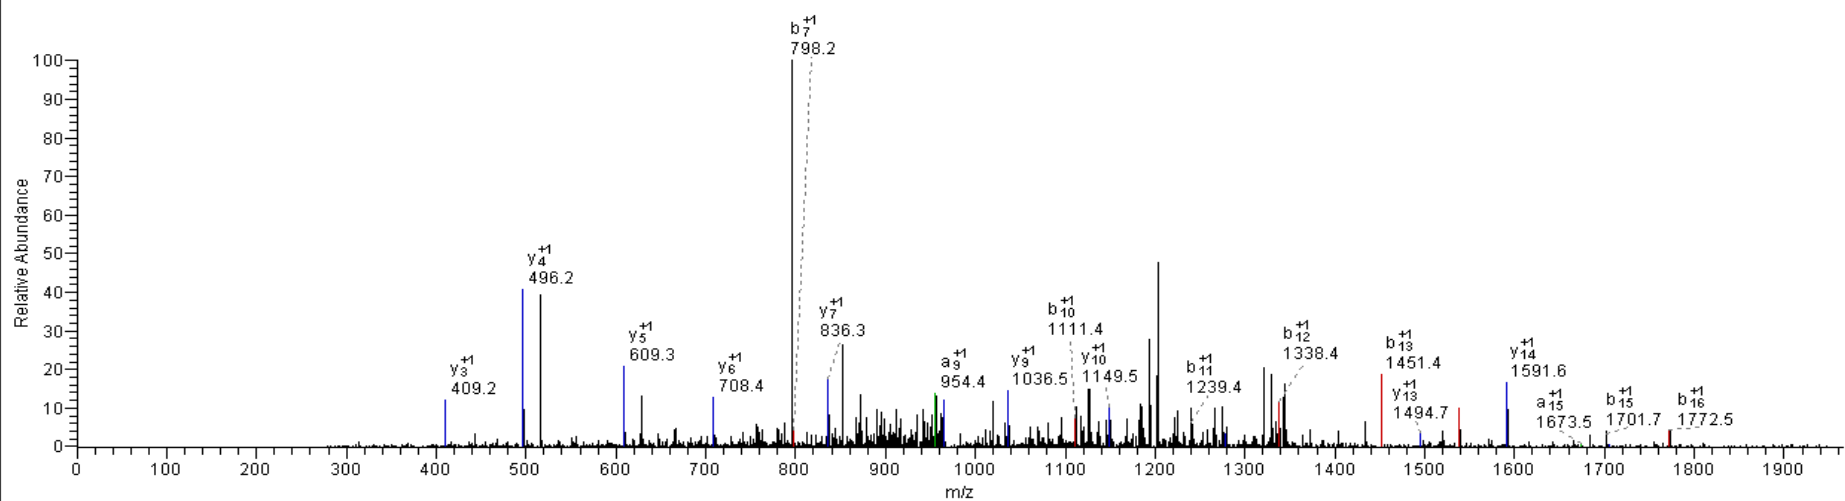

# RpS25 NP\_524315.2 RpS25 CG6684-PA

## R.DKLNNQVLFDK.A

|    | AA | A       | B       | Y       |    |
|----|----|---------|---------|---------|----|
| 1  | D  | 88.04   | 116.03  | -       | 11 |
| 2  | K  | 216.13  | 244.13  | 1218.68 | 10 |
| 3  | L  | 329.22  | 357.21  | 1090.59 | 9  |
| 4  | N  | 443.26  | 471.26  | 977.51  | 8  |
| 5  | N  | 557.30  | 585.30  | 863.46  | 7  |
| 6  | Q  | 685.36  | 713.36  | 749.42  | 6  |
| 7  | V  | 784.43  | 812.43  | 621.36  | 5  |
| 8  | L  | 897.52  | 925.51  | 522.29  | 4  |
| 9  | F  | 1044.58 | 1072.58 | 409.21  | 3  |
| 10 | D  | 1159.61 | 1187.61 | 262.14  | 2  |
| 11 | K  | -       | -       | 147.11  | 1  |

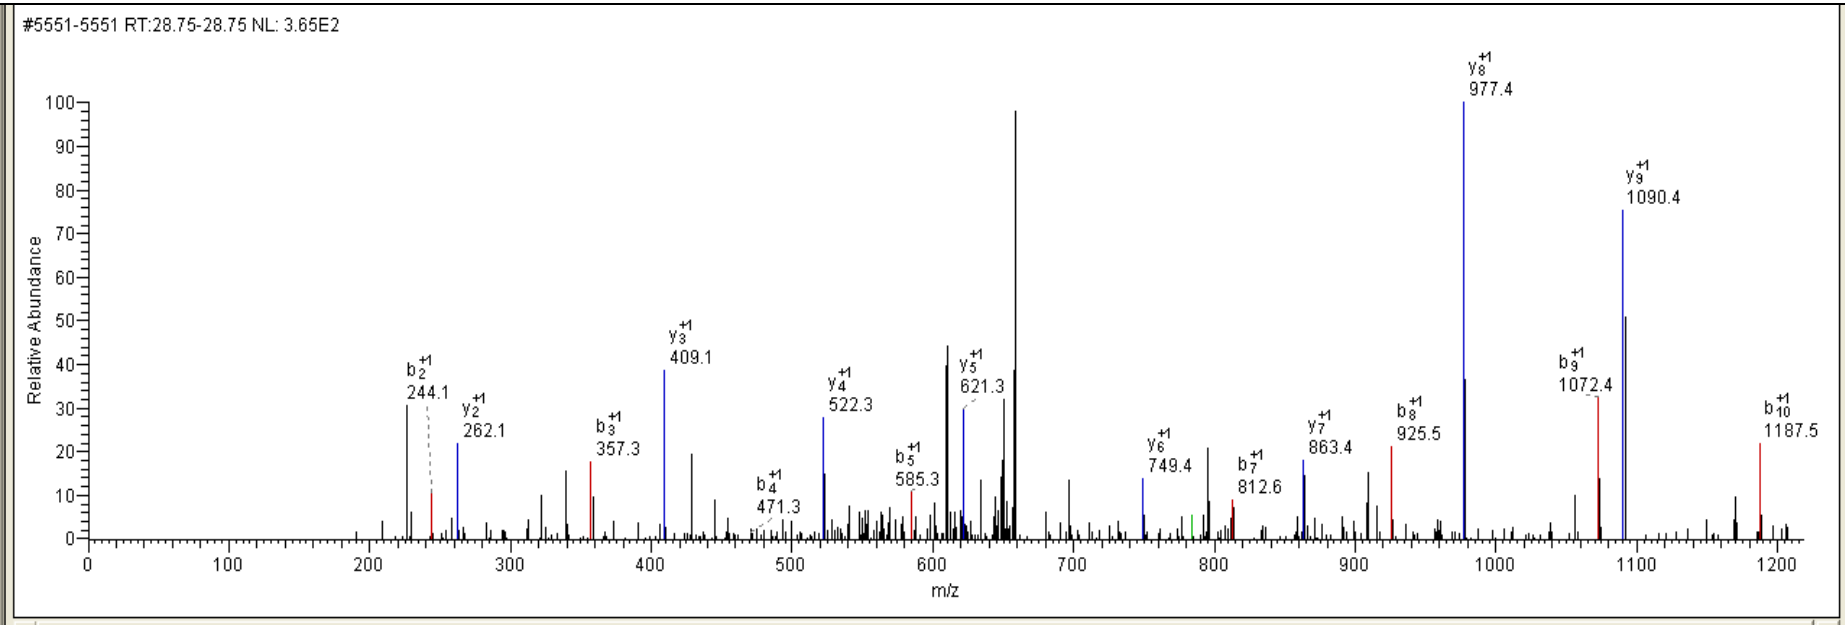

Rpt3 NP\_572686.1 Rpt3 CG16916-PA

R.EAVELPLTHFELYK.Q

|    | AA | A       | B       | Y       |    |
|----|----|---------|---------|---------|----|
| 1  | E  | 102.05  | 130.05  | -       | 14 |
| 2  | A  | 173.09  | 201.09  | 1559.85 | 13 |
| 3  | V  | 272.16  | 300.16  | 1488.81 | 12 |
| 4  | E  | 401.20  | 429.20  | 1389.74 | 11 |
| 5  | L  | 514.29  | 542.28  | 1260.70 | 10 |
| 6  | P  | 611.34  | 639.33  | 1147.61 | 9  |
| 7  | L  | 724.42  | 752.42  | 1050.56 | 8  |
| 8  | T  | 825.47  | 853.47  | 937.48  | 7  |
| 9  | H  | 962.53  | 990.53  | 836.43  | 6  |
| 10 | F  | 1109.60 | 1137.59 | 699.37  | 5  |
| 11 | E  | 1238.64 | 1266.64 | 552.30  | 4  |
| 12 | L  | 1351.73 | 1379.72 | 423.26  | 3  |
| 13 | Y  | 1514.79 | 1542.78 | 310.18  | 2  |
| 14 | K  | -       | -       | 147.11  | 1  |

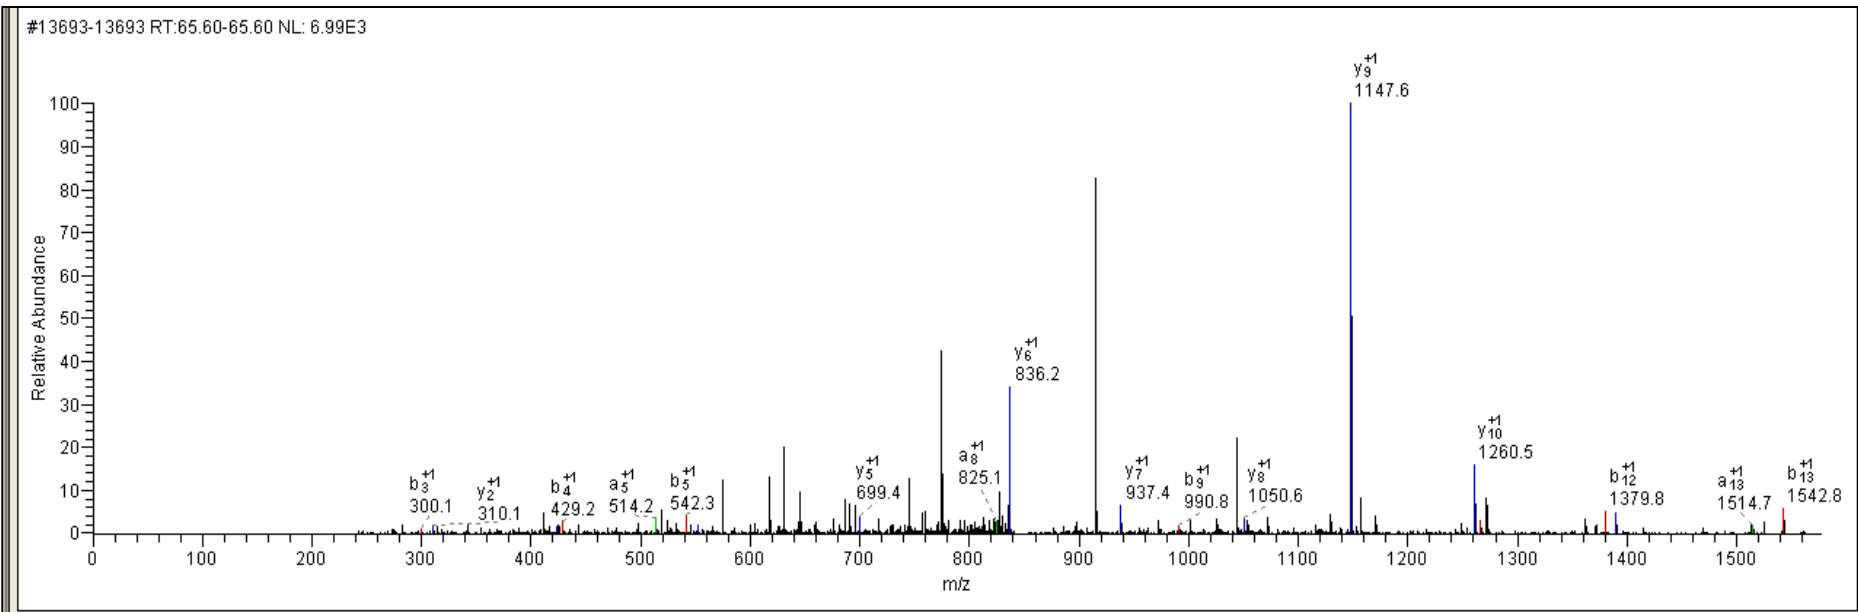

# sls NP\_652705.2 sallimus CG1915-PC

## K.TMFLDTQHPQGEAGLEAVQETEEELANR.Y

| S no | AA | A       | B       | Y       |    |
|------|----|---------|---------|---------|----|
| 1    | T  | 74.06   | 102.05  | -       | 28 |
| 2    | M  | 205.1   | 233.1   | 3042.41 | 27 |
| 3    | F  | 352.17  | 380.16  | 2911.37 | 26 |
| 4    | L  | 465.25  | 493.25  | 2764.3  | 25 |
| 5    | D  | 580.28  | 608.27  | 2651.22 | 24 |
| 6    | T  | 681.33  | 709.32  | 2536.19 | 23 |
| 7    | Q  | 809.39  | 837.38  | 2435.14 | 22 |
| 8    | H  | 946.45  | 974.44  | 2307.08 | 21 |
| 9    | P  | 1043.5  | 1071.49 | 2170.03 | 20 |
| 10   | Q  | 1171.56 | 1199.55 | 2072.97 | 19 |
| 11   | G  | 1228.58 | 1256.57 | 1944.91 | 18 |
| 12   | E  | 1357.62 | 1385.62 | 1887.89 | 17 |
| 13   | A  | 1428.66 | 1456.65 | 1758.85 | 16 |
| 14   | G  | 1485.68 | 1513.67 | 1687.81 | 15 |
| 15   | L  | 1598.76 | 1626.76 | 1630.79 | 14 |
| 16   | E  | 1727.81 | 1755.8  | 1517.71 | 13 |
| 17   | A  | 1798.84 | 1826.84 | 1388.67 | 12 |
| 18   | V  | 1897.91 | 1925.91 | 1317.63 | 11 |
| 19   | Q  | 2025.97 | 2053.96 | 1218.56 | 10 |
| 20   | E  | 2155.01 | 2183.01 | 1090.5  | 9  |
| 21   | T  | 2256.06 | 2284.06 | 961.46  | 8  |
| 22   | E  | 2385.1  | 2413.1  | 860.41  | 7  |
| 23   | E  | 2514.15 | 2542.14 | 731.37  | 6  |
| 24   | E  | 2643.19 | 2671.18 | 602.33  | 5  |
| 25   | L  | 2756.27 | 2784.27 | 473.28  | 4  |
| 26   | A  | 2827.31 | 2855.3  | 360.2   | 3  |
| 27   | N  | 2941.35 | 2969.35 | 289.16  | 2  |
| 28   | R  | -       | -       | 175.12  | 1  |

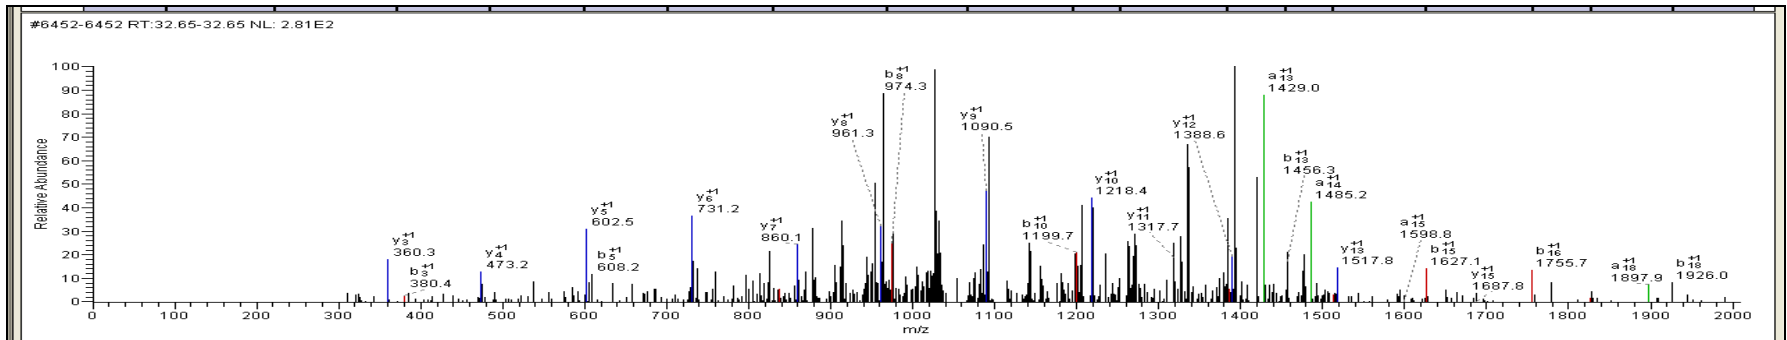

# NP\_524863.3 screw CG31695-PA

## K.ELHMHNWVIAPK.K

|    | AA | A       | B       | Y       |    |
|----|----|---------|---------|---------|----|
| 1  | E  | 102.05  | 130.05  | -       | 12 |
| 2  | L  | 215.14  | 243.13  | 1361.71 | 11 |
| 3  | H  | 352.20  | 380.19  | 1248.63 | 10 |
| 4  | M* | 499.23  | 527.23  | 1111.57 | 9  |
| 5  | H  | 636.29  | 664.29  | 964.54  | 8  |
| 6  | N  | 750.34  | 778.33  | 827.48  | 7  |
| 7  | W  | 936.41  | 964.41  | 713.43  | 6  |
| 8  | V  | 1035.48 | 1063.48 | 527.36  | 5  |
| 9  | I  | 1148.57 | 1176.56 | 428.29  | 4  |
| 10 | A  | 1219.60 | 1247.60 | 315.20  | 3  |
| 11 | P  | 1316.66 | 1344.65 | 244.17  | 2  |
| 12 | K  | -       | -       | 147.11  | 1  |

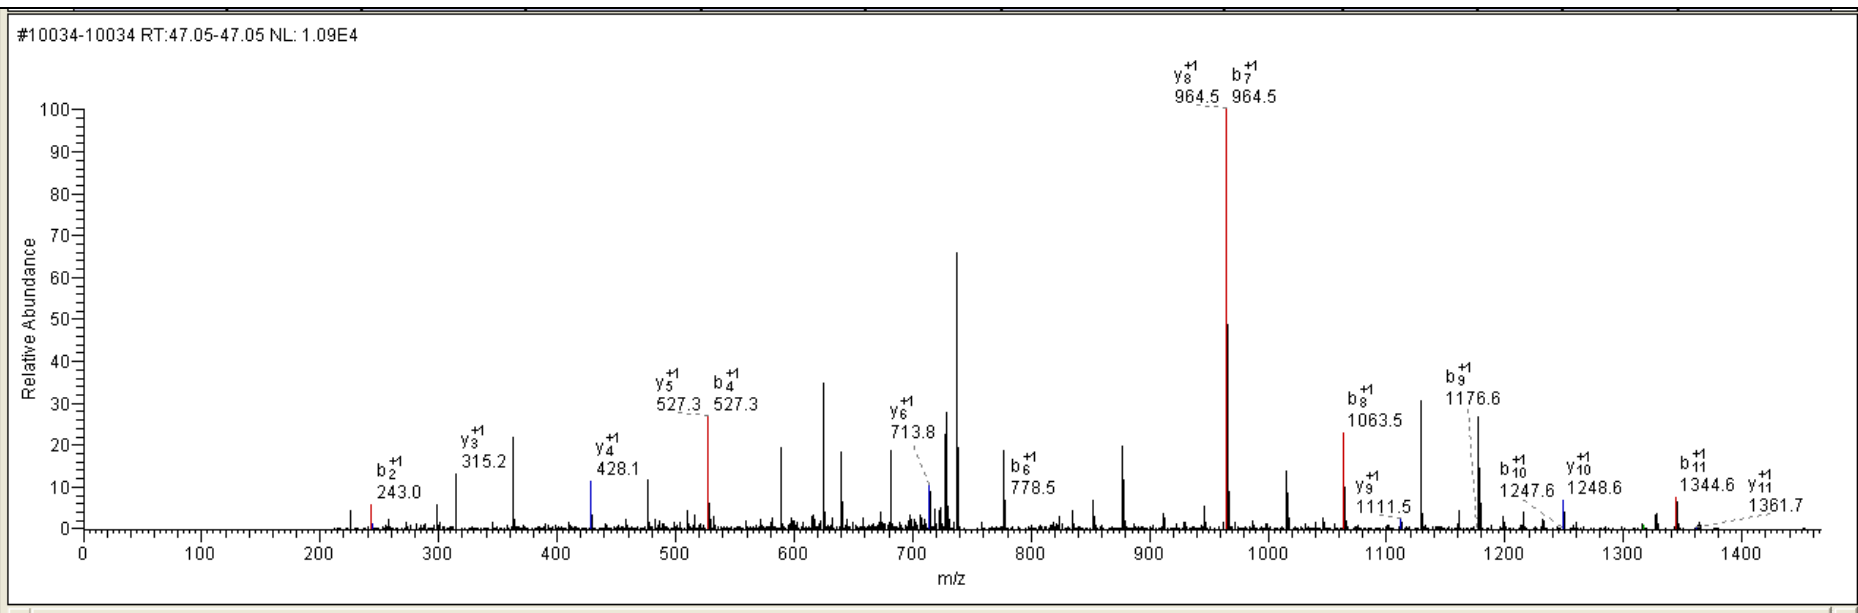



shot NP\_725335.1 short stop CG18076-PG

R.GVTERYTGLVDASDNIGALLAESR.Q

| S no | AA | A       | B       | Y       |    |
|------|----|---------|---------|---------|----|
| 1    | G  | 30.03   | 58.03   | -       | 24 |
| 2    | V  | 129.1   | 157.1   | 2450.25 | 23 |
| 3    | T  | 230.15  | 258.14  | 2351.18 | 22 |
| 4    | E  | 359.19  | 387.19  | 2250.14 | 21 |
| 5    | R  | 515.29  | 543.29  | 2121.09 | 20 |
| 6    | Y  | 678.36  | 706.35  | 1964.99 | 19 |
| 7    | T  | 779.4   | 807.4   | 1801.93 | 18 |
| 8    | G  | 836.43  | 864.42  | 1700.88 | 17 |
| 9    | L  | 949.51  | 977.51  | 1643.86 | 16 |
| 10   | V  | 1048.58 | 1076.57 | 1530.78 | 15 |
| 11   | D  | 1163.61 | 1191.6  | 1431.71 | 14 |
| 12   | A  | 1234.64 | 1262.64 | 1316.68 | 13 |
| 13   | S  | 1321.67 | 1349.67 | 1245.64 | 12 |
| 14   | D  | 1436.7  | 1464.7  | 1158.61 | 11 |
| 15   | N  | 1550.74 | 1578.74 | 1043.58 | 10 |
| 16   | I  | 1663.83 | 1691.82 | 929.54  | 9  |
| 17   | G  | 1720.85 | 1748.84 | 816.46  | 8  |
| 18   | A  | 1791.89 | 1819.88 | 759.44  | 7  |
| 19   | L  | 1904.97 | 1932.97 | 688.4   | 6  |
| 20   | L  | 2018.06 | 2046.05 | 575.31  | 5  |
| 21   | A  | 2089.09 | 2117.09 | 462.23  | 4  |
| 22   | E  | 2218.14 | 2246.13 | 391.19  | 3  |
| 23   | S  | 2305.17 | 2333.16 | 262.15  | 2  |
| 24   | R  | -       | -       | 175.12  | 1  |

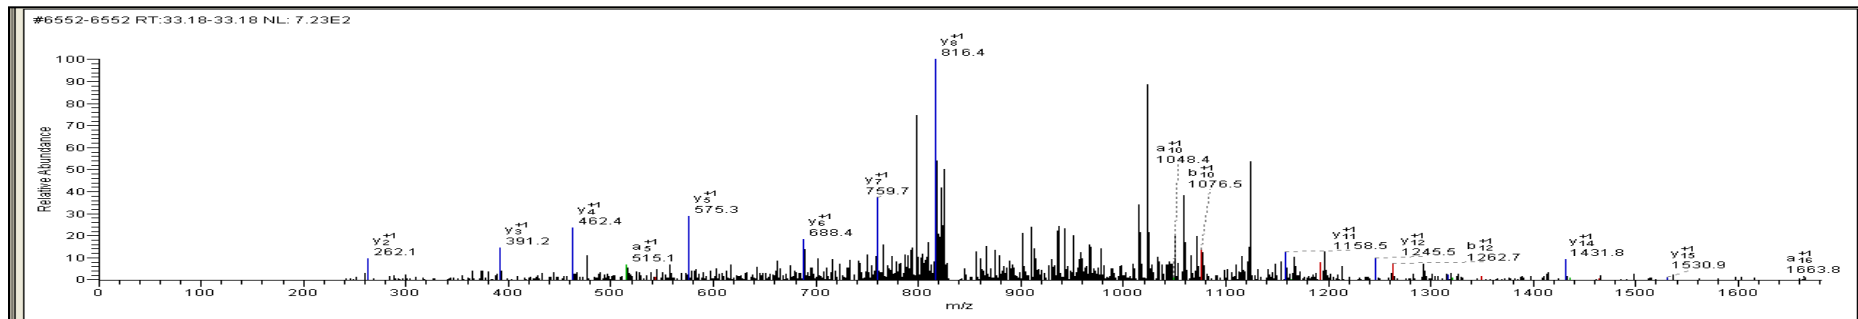

# Snr1 NP\_730935.1 Snf5-related 1 CG1064-PA

## R.LAESGLSSHILASSVLLR.A

|    | AA | A       | B       | Y       |    |
|----|----|---------|---------|---------|----|
| 1  | L  | 86.10   | 114.09  | -       | 19 |
| 2  | A  | 157.13  | 185.13  | 1827.00 | 18 |
| 3  | E  | 286.18  | 314.17  | 1755.96 | 17 |
| 4  | S  | 373.21  | 401.20  | 1626.92 | 16 |
| 5  | G  | 430.23  | 458.22  | 1539.89 | 15 |
| 6  | L  | 543.31  | 571.31  | 1482.86 | 14 |
| 7  | S  | 630.35  | 658.34  | 1369.78 | 13 |
| 8  | S  | 717.38  | 745.37  | 1282.75 | 12 |
| 9  | H  | 854.44  | 882.43  | 1195.72 | 11 |
| 10 | I  | 967.52  | 995.52  | 1058.66 | 10 |
| 11 | L  | 1080.60 | 1108.60 | 945.57  | 9  |
| 12 | A  | 1151.64 | 1179.64 | 832.49  | 8  |
| 13 | S  | 1238.67 | 1266.67 | 761.45  | 7  |
| 14 | S  | 1325.71 | 1353.70 | 674.42  | 6  |
| 15 | V  | 1424.77 | 1452.77 | 587.39  | 5  |
| 16 | S  | 1511.81 | 1539.80 | 488.32  | 4  |
| 17 | L  | 1624.89 | 1652.89 | 401.29  | 3  |
| 18 | L  | 1737.97 | 1765.97 | 288.20  | 2  |
| 19 | R  | -       | -       | 175.12  | 1  |

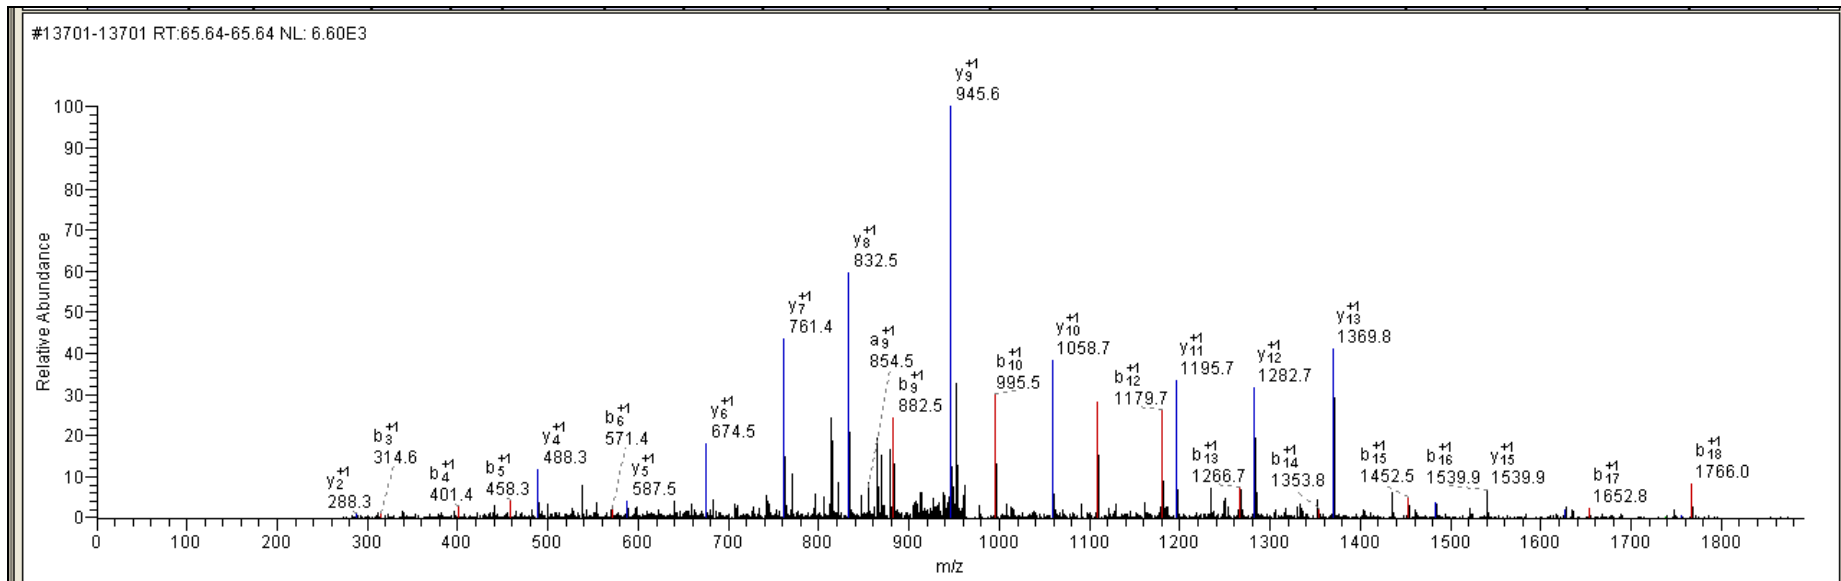

# SpdS NP\_731384.1 Spermidine Synthase CG8327-PA

## R.DEFSYQEMISFLPLCAHPNPK.K

|    | AA | A       | B       | Y       |    |
|----|----|---------|---------|---------|----|
| 1  | D  | 88.04   | 116.03  | -       | 21 |
| 2  | E  | 217.08  | 245.08  | 2367.11 | 20 |
| 3  | F  | 364.15  | 392.15  | 2238.07 | 19 |
| 4  | S  | 451.18  | 479.18  | 2091.00 | 18 |
| 5  | Y  | 614.25  | 642.24  | 2003.97 | 17 |
| 6  | Q  | 742.30  | 770.30  | 1840.91 | 16 |
| 7  | E  | 871.35  | 899.34  | 1712.85 | 15 |
| 8  | M* | 1018.38 | 1046.38 | 1583.81 | 14 |
| 9  | I  | 1131.47 | 1159.46 | 1436.77 | 13 |
| 10 | S  | 1218.50 | 1246.49 | 1323.69 | 12 |
| 11 | F  | 1365.57 | 1393.56 | 1236.66 | 11 |
| 12 | L  | 1478.65 | 1506.65 | 1089.59 | 10 |
| 13 | P  | 1575.70 | 1603.70 | 976.50  | 9  |
| 14 | L  | 1688.79 | 1716.78 | 879.45  | 8  |
| 15 | C  | 1791.80 | 1819.79 | 766.37  | 7  |
| 16 | A  | 1862.83 | 1890.83 | 663.36  | 6  |
| 17 | H  | 1999.89 | 2027.89 | 592.32  | 5  |
| 18 | P  | 2096.95 | 2124.94 | 455.26  | 4  |
| 19 | N  | 2210.99 | 2238.98 | 358.21  | 3  |
| 20 | P  | 2308.04 | 2336.04 | 244.17  | 2  |
| 21 | K  | -       | -       | 147.11  | 1  |

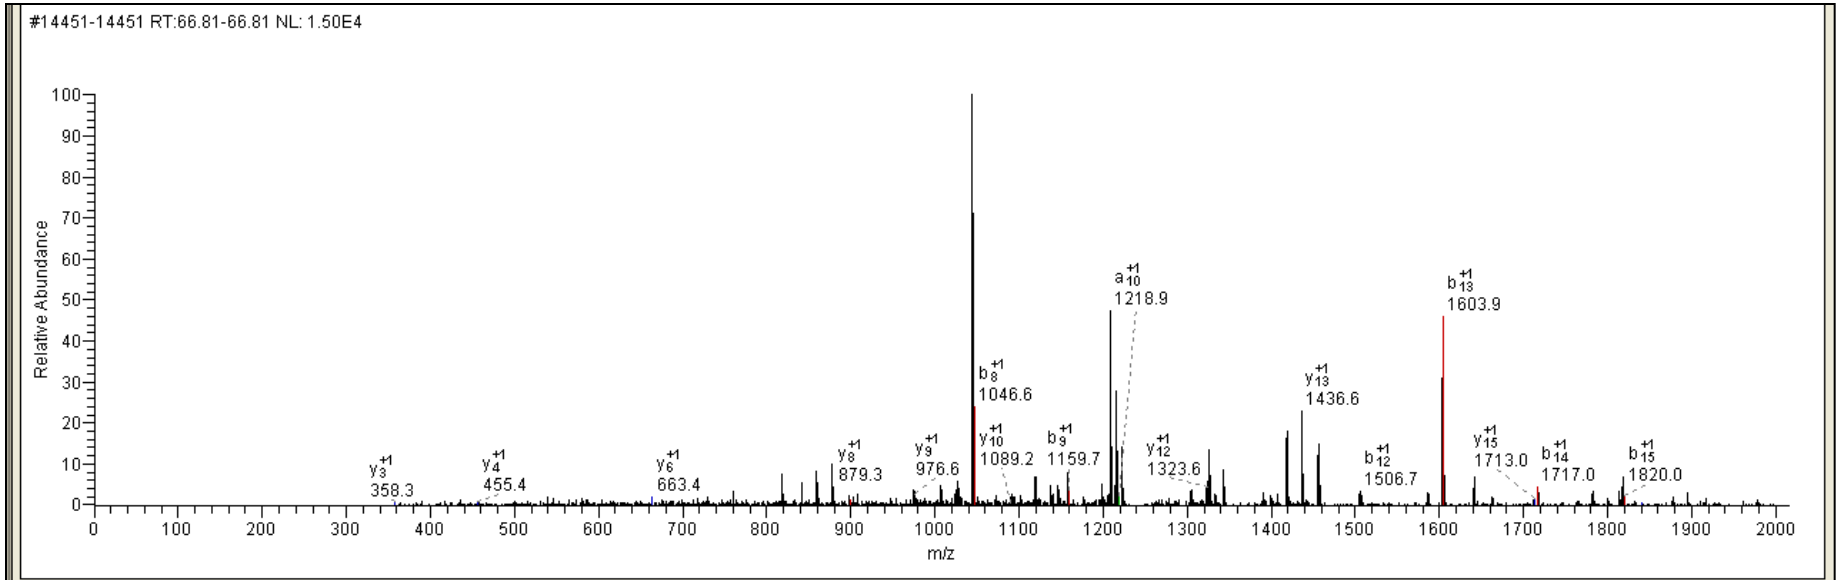

# sesB NP\_727448.1 stress-sensitive B CG16944-PC

K.DFDAVGFKDFAAGGISA AVSK.T

|    | AA | A       | B       | Y       |    |
|----|----|---------|---------|---------|----|
| 1  | D  | 88.04   | 116.03  | -       | 22 |
| 2  | F  | 235.11  | 263.10  | 2057.07 | 21 |
| 3  | D  | 350.13  | 378.13  | 1910.00 | 20 |
| 4  | A  | 421.17  | 449.17  | 1794.97 | 19 |
| 5  | V  | 520.24  | 548.24  | 1723.94 | 18 |
| 6  | G  | 577.26  | 605.26  | 1624.87 | 17 |
| 7  | F  | 724.33  | 752.32  | 1567.85 | 16 |
| 8  | V  | 823.40  | 851.39  | 1420.78 | 15 |
| 9  | K  | 951.49  | 979.49  | 1321.71 | 14 |
| 10 | D  | 1066.52 | 1094.52 | 1193.62 | 13 |
| 11 | F  | 1213.59 | 1241.58 | 1078.59 | 12 |
| 12 | A  | 1284.63 | 1312.62 | 931.52  | 11 |
| 13 | A  | 1355.66 | 1383.66 | 860.48  | 10 |
| 14 | G  | 1412.68 | 1440.68 | 789.45  | 9  |
| 15 | G  | 1469.71 | 1497.70 | 732.43  | 8  |
| 16 | I  | 1582.79 | 1610.78 | 675.40  | 7  |
| 17 | S  | 1669.82 | 1697.82 | 562.32  | 6  |
| 18 | A  | 1740.86 | 1768.85 | 475.29  | 5  |
| 19 | A  | 1811.90 | 1839.89 | 404.25  | 4  |
| 20 | V  | 1910.96 | 1938.96 | 333.21  | 3  |
| 21 | S  | 1998.00 | 2025.99 | 234.14  | 2  |
| 22 | K  | -       | -       | 147.11  | 1  |

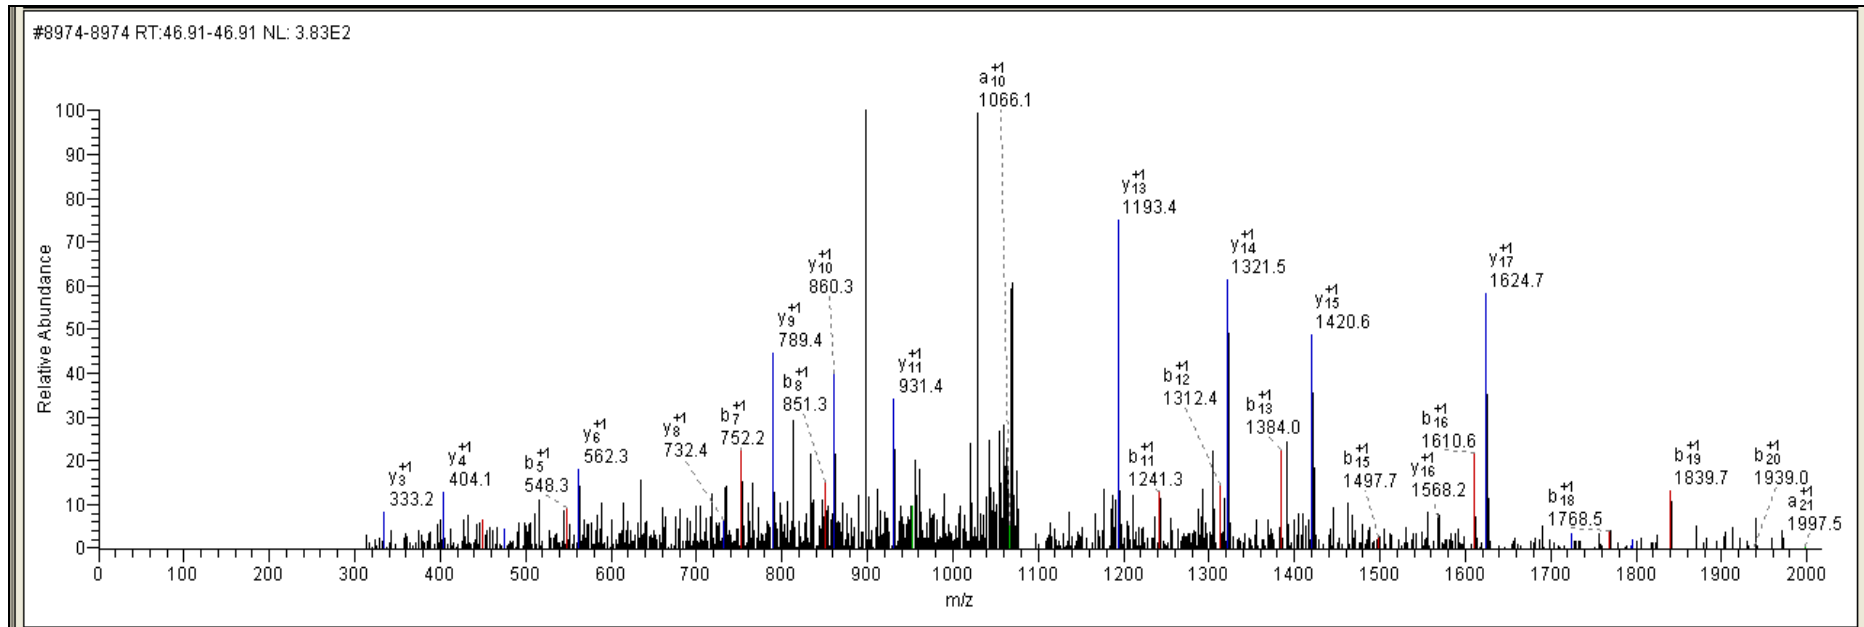

# Taf1 NP\_996160.1 TBP-associated factor 1 CG17603-PB

## R.SMPDVSPFLFPVSAK.K

|    | AA | A       | B       | Y       |    |
|----|----|---------|---------|---------|----|
| 1  | S  | 60.04   | 88.04   | -       | 15 |
| 2  | M  | 191.08  | 219.08  | 1534.80 | 14 |
| 3  | P  | 288.14  | 316.13  | 1403.76 | 13 |
| 4  | D  | 403.16  | 431.16  | 1306.70 | 12 |
| 5  | V  | 502.23  | 530.23  | 1191.68 | 11 |
| 6  | S  | 589.27  | 617.26  | 1092.61 | 10 |
| 7  | P  | 686.32  | 714.31  | 1005.58 | 9  |
| 8  | F  | 833.39  | 861.38  | 908.52  | 8  |
| 9  | L  | 946.47  | 974.47  | 761.46  | 7  |
| 10 | F  | 1093.54 | 1121.53 | 648.37  | 6  |
| 11 | P  | 1190.59 | 1218.59 | 501.30  | 5  |
| 12 | V  | 1289.66 | 1317.65 | 404.25  | 4  |
| 13 | S  | 1376.69 | 1404.69 | 305.18  | 3  |
| 14 | A  | 1447.73 | 1475.72 | 218.15  | 2  |
| 15 | K  | -       | -       | 147.11  | 1  |

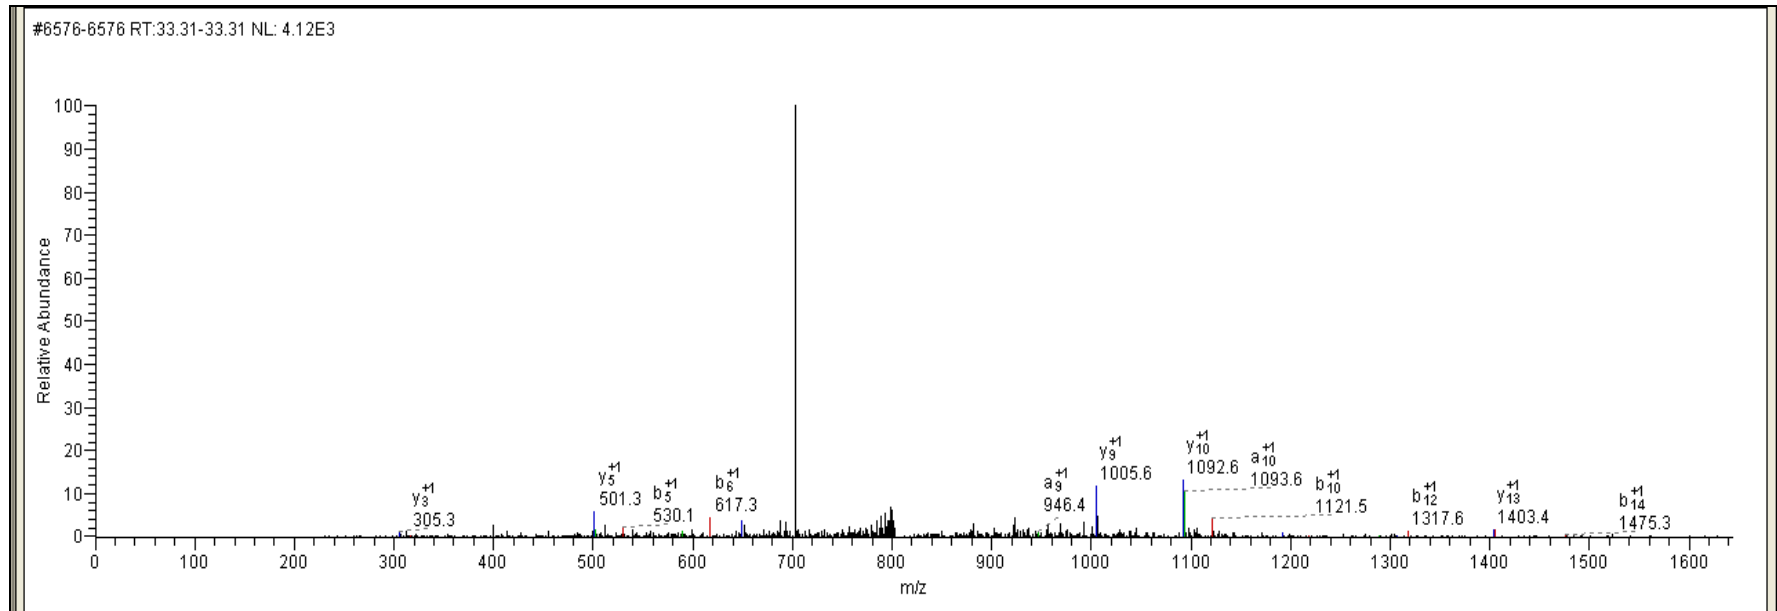

# Taf12 NP\_731616.1 TBP-associated factor 12 CG17358-PB

R.DVQLHFER.K

|   | AA | A      | B      | Y      |   |
|---|----|--------|--------|--------|---|
| 1 | D  | 88.04  | 116.03 | -      | 8 |
| 2 | V  | 187.11 | 215.10 | 928.50 | 7 |
| 3 | Q  | 315.17 | 343.16 | 829.43 | 6 |
| 4 | L  | 428.25 | 456.25 | 701.37 | 5 |
| 5 | H  | 565.31 | 593.30 | 588.29 | 4 |
| 6 | F  | 712.38 | 740.37 | 451.23 | 3 |
| 7 | E  | 841.42 | 869.42 | 304.16 | 2 |
| 8 | R  | -      | -      | 175.12 | 1 |

#5416-5416 RT:28.04-28.04 NL: 3.55E2

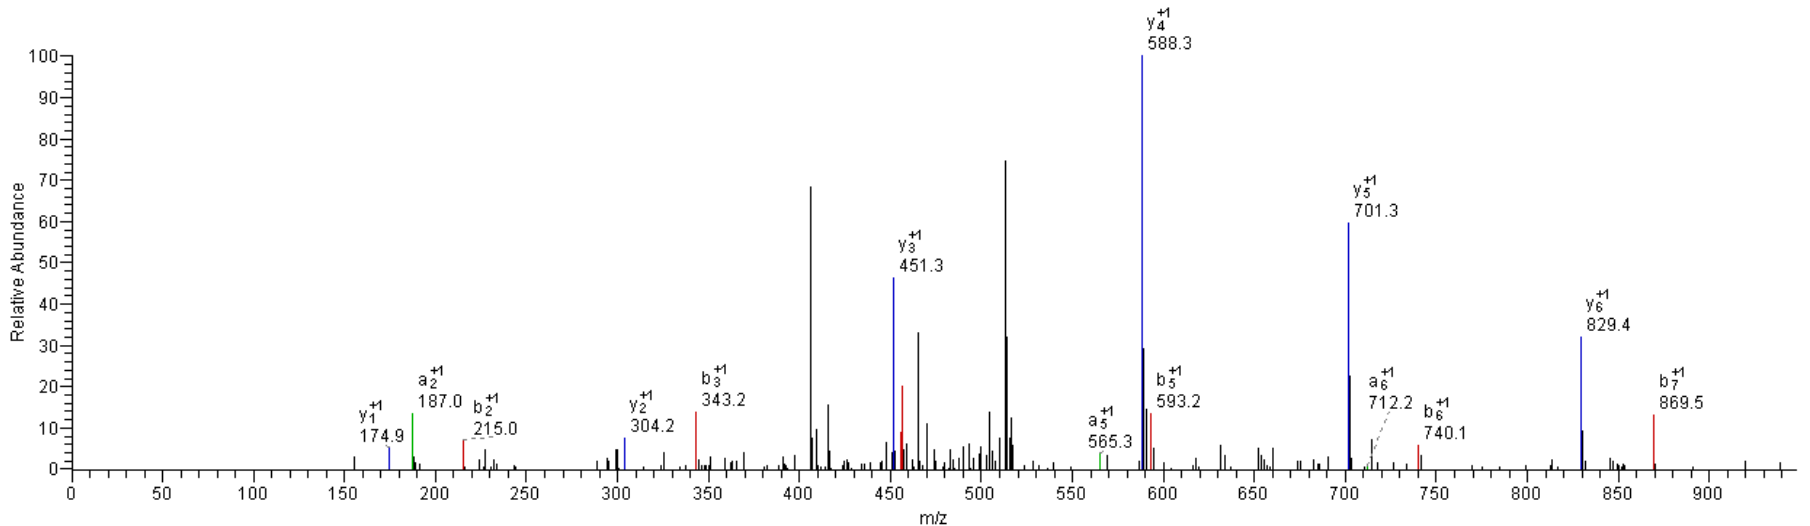

# Taf8 NP\_523397.1 TBP-associated factor 8 CG7128-PA

## R.TPSTLEITKTNL

|    | AA | A       | B       | Y       |    |
|----|----|---------|---------|---------|----|
| 1  | T  | 74.06   | 102.05  | -       | 12 |
| 2  | P  | 171.11  | 199.11  | 1216.68 | 11 |
| 3  | S  | 258.14  | 286.14  | 1119.63 | 10 |
| 4  | T  | 359.19  | 387.19  | 1032.59 | 9  |
| 5  | L  | 472.28  | 500.27  | 931.55  | 8  |
| 6  | E  | 601.32  | 629.31  | 818.46  | 7  |
| 7  | I  | 714.40  | 742.40  | 689.42  | 6  |
| 8  | T  | 815.45  | 843.45  | 576.34  | 5  |
| 9  | K  | 943.55  | 971.54  | 475.29  | 4  |
| 10 | T  | 1044.59 | 1072.59 | 347.19  | 3  |
| 11 | N  | 1158.64 | 1186.63 | 246.14  | 2  |
| 12 | L  | -       | -       | 132.10  | 1  |

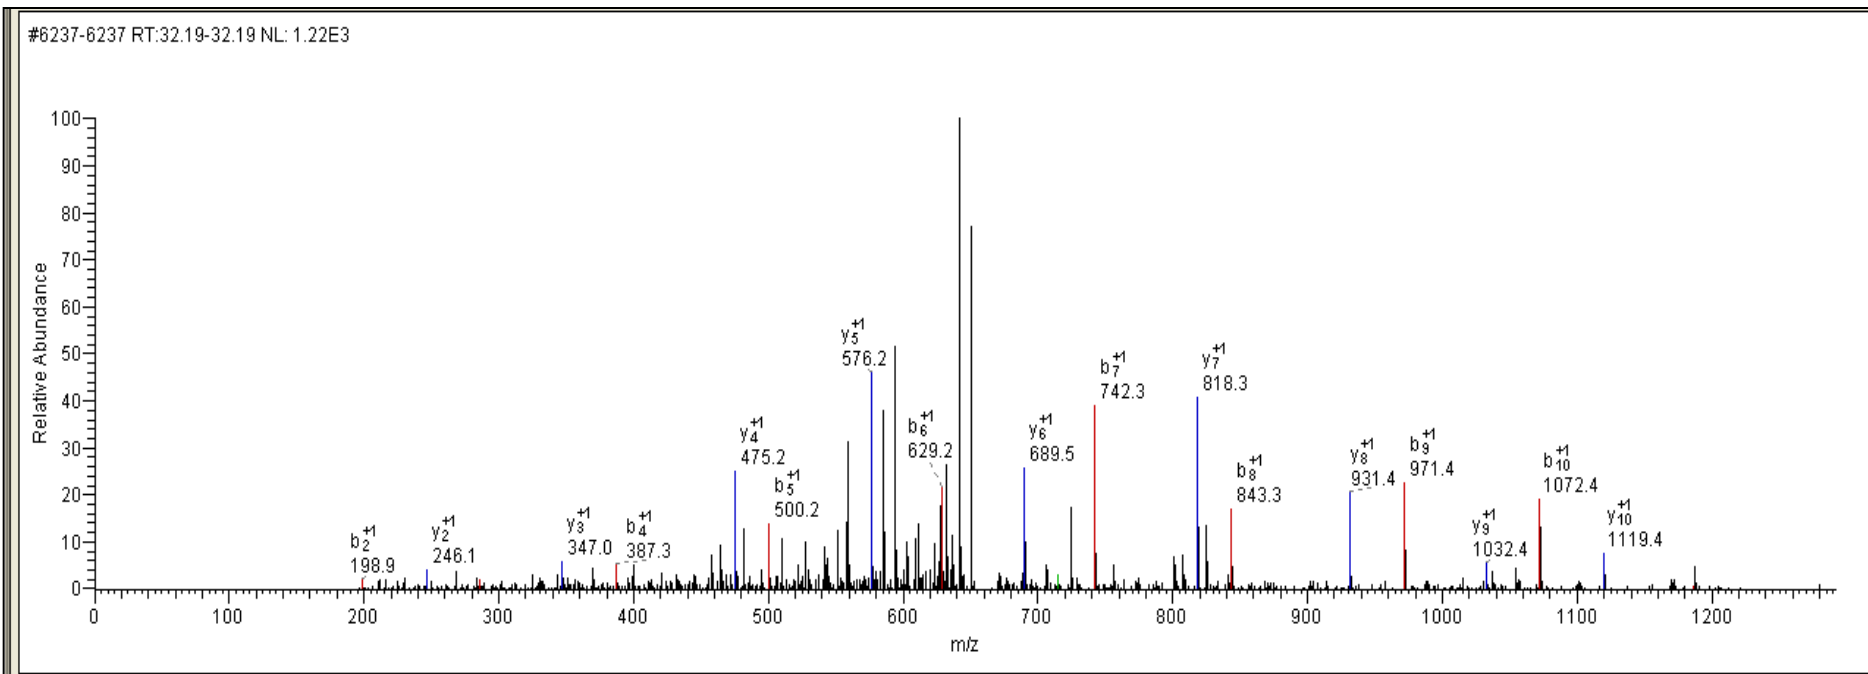

# Thiolase NP\_477378.1 Thiolase CG4581-PA

R.HSLLSLLQK.N

|   | AA | A      | B      | Y      |   |
|---|----|--------|--------|--------|---|
| 1 | H  | 110.07 | 138.07 | -      | 9 |
| 2 | S  | 197.10 | 225.10 | 901.57 | 8 |
| 3 | L  | 310.19 | 338.18 | 814.54 | 7 |
| 4 | L  | 423.27 | 451.27 | 701.46 | 6 |
| 5 | S  | 510.30 | 538.30 | 588.37 | 5 |
| 6 | L  | 623.39 | 651.38 | 501.34 | 4 |
| 7 | L  | 736.47 | 764.47 | 388.26 | 3 |
| 8 | Q  | 864.53 | 892.53 | 275.17 | 2 |
| 9 | K  | -      | -      | 147.11 | 1 |

#7565-7565 RT:38.99-38.99 NL: 1.46E4

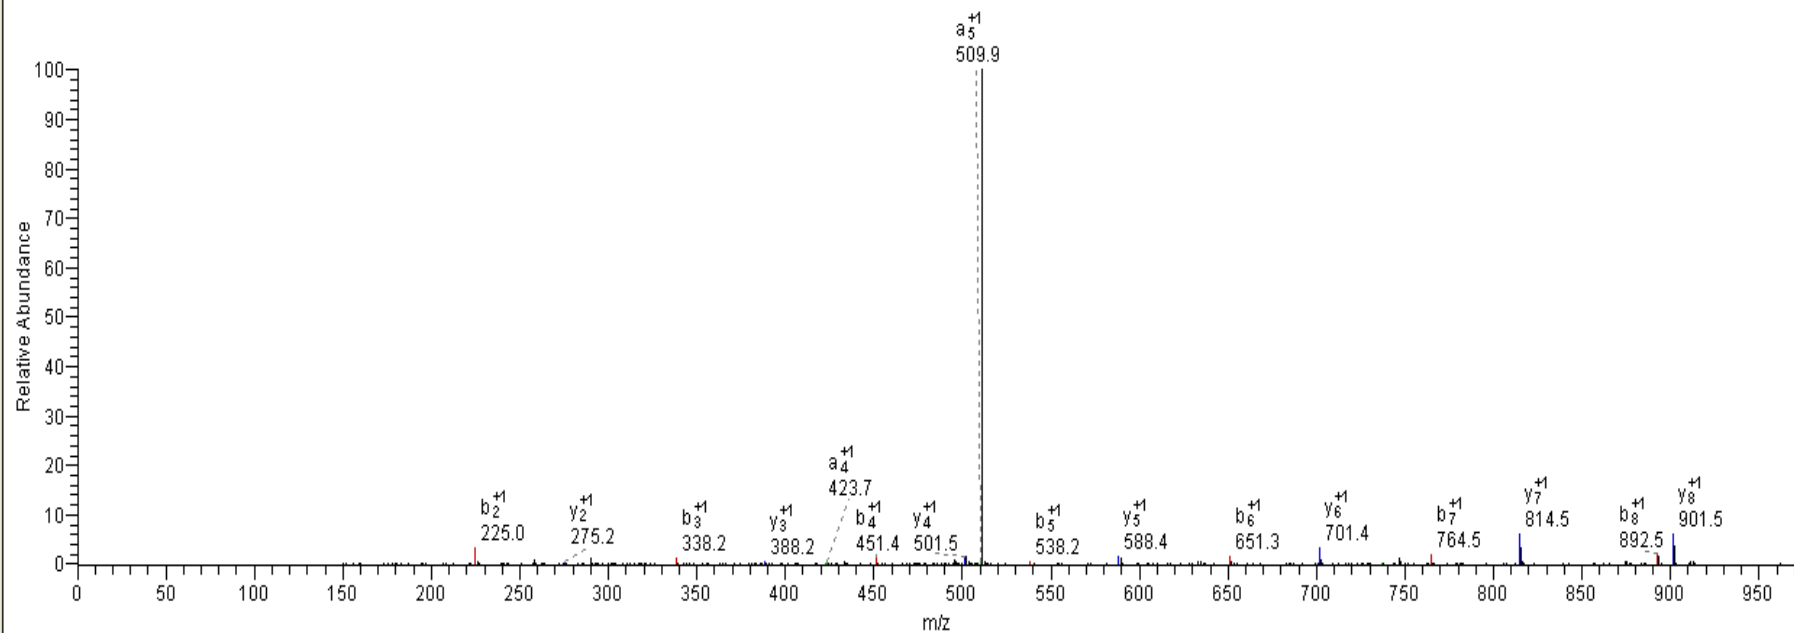



# Jafrac1 NP\_727689.1 thioredoxin peroxidase 1 CG1633-PB

## R.DYGVLDDEETGIPFR.G

|    | AA | A       | B       | Y       |    |
|----|----|---------|---------|---------|----|
| 1  | D  | 88.04   | 116.03  | -       | 14 |
| 2  | Y  | 251.10  | 279.10  | 1495.74 | 13 |
| 3  | G  | 308.12  | 336.12  | 1332.68 | 12 |
| 4  | V  | 407.19  | 435.19  | 1275.66 | 11 |
| 5  | L  | 520.28  | 548.27  | 1176.59 | 10 |
| 6  | D  | 635.30  | 663.30  | 1063.51 | 9  |
| 7  | E  | 764.35  | 792.34  | 948.48  | 8  |
| 8  | E  | 893.39  | 921.38  | 819.44  | 7  |
| 9  | T  | 994.44  | 1022.43 | 690.39  | 6  |
| 10 | G  | 1051.46 | 1079.45 | 589.35  | 5  |
| 11 | I  | 1164.54 | 1192.54 | 532.32  | 4  |
| 12 | P  | 1261.59 | 1289.59 | 419.24  | 3  |
| 13 | F  | 1408.66 | 1436.66 | 322.19  | 2  |
| 14 | R  | -       | -       | 175.12  | 1  |

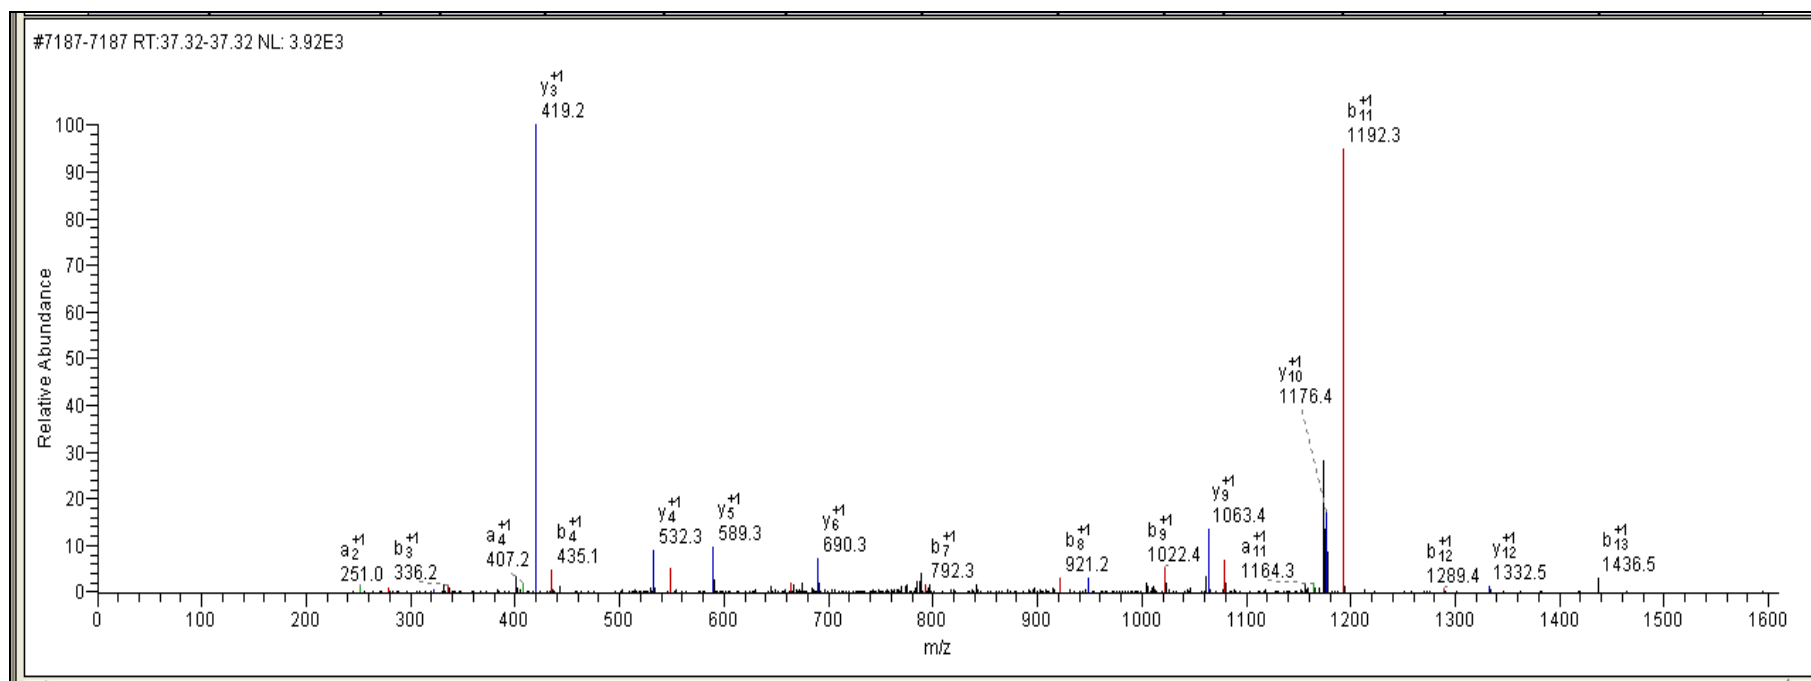

Tctp NP\_650048.1

Translationally controlled tumor protein CG4800-PA

K.LVDDVIYEVY GK.L

|    | AA | A       | B       | Y       |    |
|----|----|---------|---------|---------|----|
| 1  | L  | 86.10   | 114.09  | -       | 12 |
| 2  | V  | 185.16  | 213.16  | 1299.65 | 11 |
| 3  | D  | 300.19  | 328.19  | 1200.58 | 10 |
| 4  | D  | 415.22  | 443.21  | 1085.55 | 9  |
| 5  | V  | 514.29  | 542.28  | 970.52  | 8  |
| 6  | I  | 627.37  | 655.37  | 871.46  | 7  |
| 7  | Y  | 790.43  | 818.43  | 758.37  | 6  |
| 8  | E  | 919.48  | 947.47  | 595.31  | 5  |
| 9  | V  | 1018.55 | 1046.54 | 466.27  | 4  |
| 10 | Y  | 1181.61 | 1209.60 | 367.20  | 3  |
| 11 | G  | 1238.63 | 1266.63 | 204.13  | 2  |
| 12 | K  | -       | -       | 147.11  | 1  |

#7131-7131 RT:37.03-37.03 NL: 1.62E3

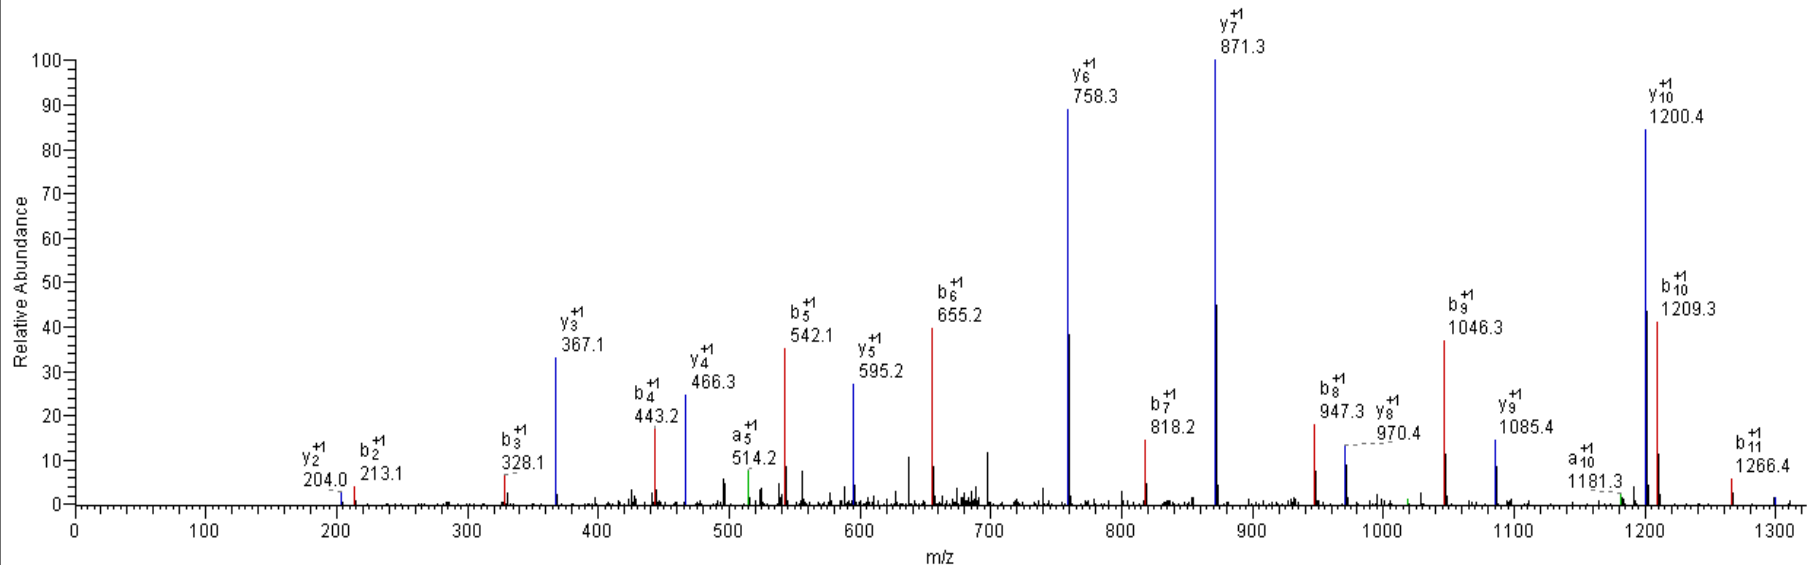

# Trap1 NP\_477439.2 Trap1 CG3152-PA

## K.GVVDSEDIPLNLSR.E

|    | AA | A       | B       | Y       |    |
|----|----|---------|---------|---------|----|
| 1  | G  | 30.03   | 58.03   | -       | 14 |
| 2  | V  | 129.10  | 157.10  | 1456.76 | 13 |
| 3  | V  | 228.17  | 256.17  | 1357.70 | 12 |
| 4  | D  | 343.20  | 371.19  | 1258.63 | 11 |
| 5  | S  | 430.23  | 458.22  | 1143.60 | 10 |
| 6  | E  | 559.27  | 587.27  | 1056.57 | 9  |
| 7  | D  | 674.30  | 702.29  | 927.53  | 8  |
| 8  | I  | 787.38  | 815.38  | 812.50  | 7  |
| 9  | P  | 884.44  | 912.43  | 699.41  | 6  |
| 10 | L  | 997.52  | 1025.51 | 602.36  | 5  |
| 11 | N  | 1111.56 | 1139.56 | 489.28  | 4  |
| 12 | L  | 1224.65 | 1252.64 | 375.24  | 3  |
| 13 | S  | 1311.68 | 1339.67 | 262.15  | 2  |
| 14 | R  | -       | -       | 175.12  | 1  |

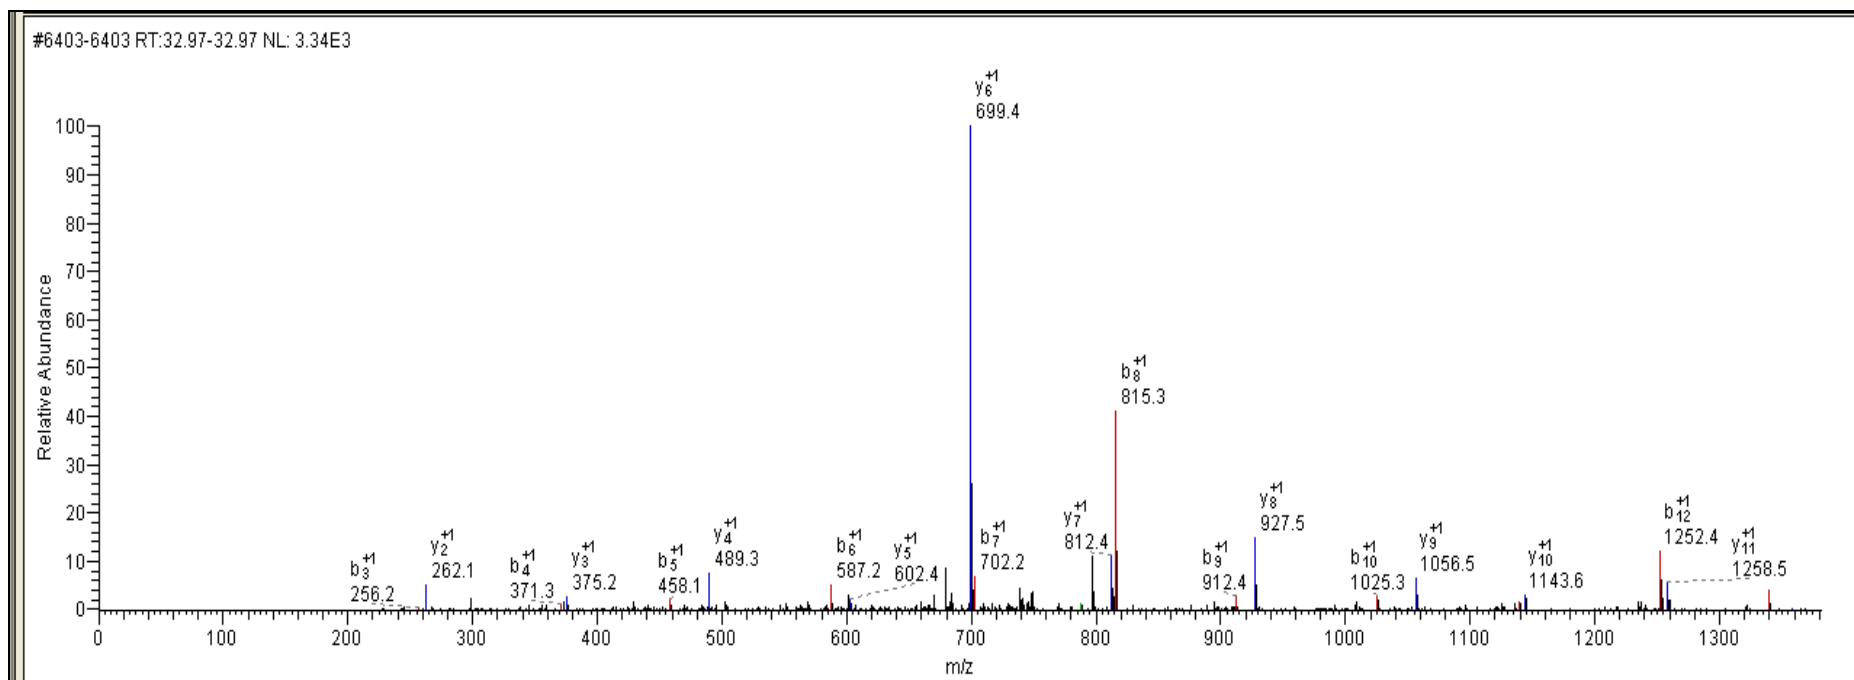

tw5 NP\_476880.1 twins CG6235-PA

R.SFFSEIISSISDVK.L

|    | AA | A       | B       | Y       |    |
|----|----|---------|---------|---------|----|
| 1  | S  | 60.04   | 88.04   | -       | 14 |
| 2  | F  | 207.11  | 235.11  | 1471.77 | 13 |
| 3  | F  | 354.18  | 382.18  | 1324.70 | 12 |
| 4  | S  | 441.21  | 469.21  | 1177.63 | 11 |
| 5  | E  | 570.26  | 598.25  | 1090.60 | 10 |
| 6  | I  | 683.34  | 711.33  | 961.56  | 9  |
| 7  | I  | 796.42  | 824.42  | 848.47  | 8  |
| 8  | S  | 883.46  | 911.45  | 735.39  | 7  |
| 9  | S  | 970.49  | 998.48  | 648.36  | 6  |
| 10 | I  | 1083.57 | 1111.57 | 561.32  | 5  |
| 11 | S  | 1170.60 | 1198.60 | 448.24  | 4  |
| 12 | D  | 1285.63 | 1313.63 | 361.21  | 3  |
| 13 | V  | 1384.70 | 1412.69 | 246.18  | 2  |
| 14 | K  | -       | -       | 147.11  | 1  |

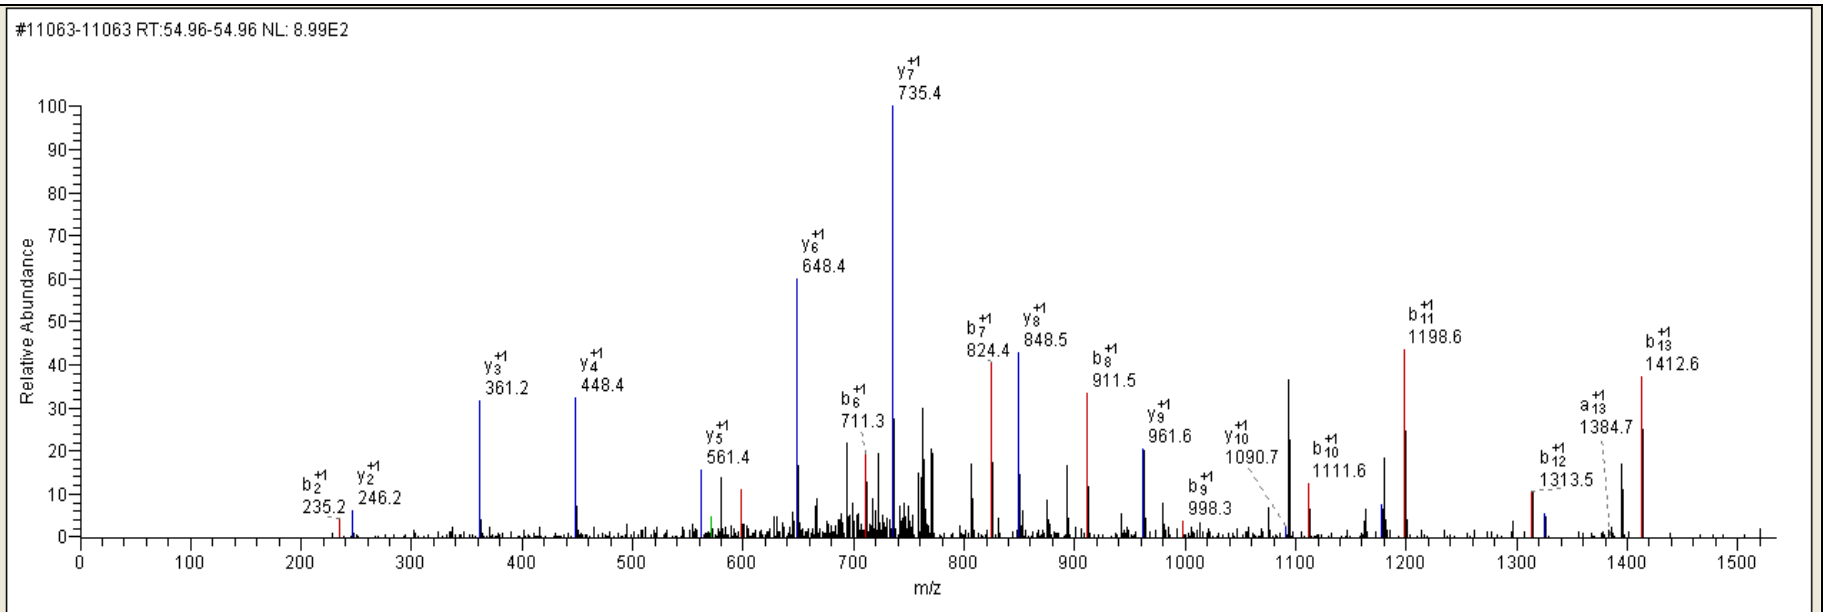

# Ubi-p5E NP\_727078.1 Ubiquitin-5E CG32744-PA

## K.TITLEVEPSDTIENVK.A

|    | AA | A       | B       | Y       |    |
|----|----|---------|---------|---------|----|
| 1  | T  | 74.06   | 102.05  | -       | 16 |
| 2  | I  | 187.14  | 215.14  | 1686.88 | 15 |
| 3  | T  | 288.19  | 316.19  | 1573.80 | 14 |
| 4  | L  | 401.28  | 429.27  | 1472.75 | 13 |
| 5  | E  | 530.32  | 558.31  | 1359.66 | 12 |
| 6  | V  | 629.39  | 657.38  | 1230.62 | 11 |
| 7  | E  | 758.43  | 786.42  | 1131.55 | 10 |
| 8  | P  | 855.48  | 883.48  | 1002.51 | 9  |
| 9  | S  | 942.51  | 970.51  | 905.46  | 8  |
| 10 | D  | 1057.54 | 1085.54 | 818.43  | 7  |
| 11 | T  | 1158.59 | 1186.58 | 703.40  | 6  |
| 12 | I  | 1271.67 | 1299.67 | 602.35  | 5  |
| 13 | E  | 1400.72 | 1428.71 | 489.27  | 4  |
| 14 | N  | 1514.76 | 1542.75 | 360.22  | 3  |
| 15 | V  | 1613.83 | 1641.82 | 246.18  | 2  |
| 16 | K  | -       | -       | 147.11  | 1  |

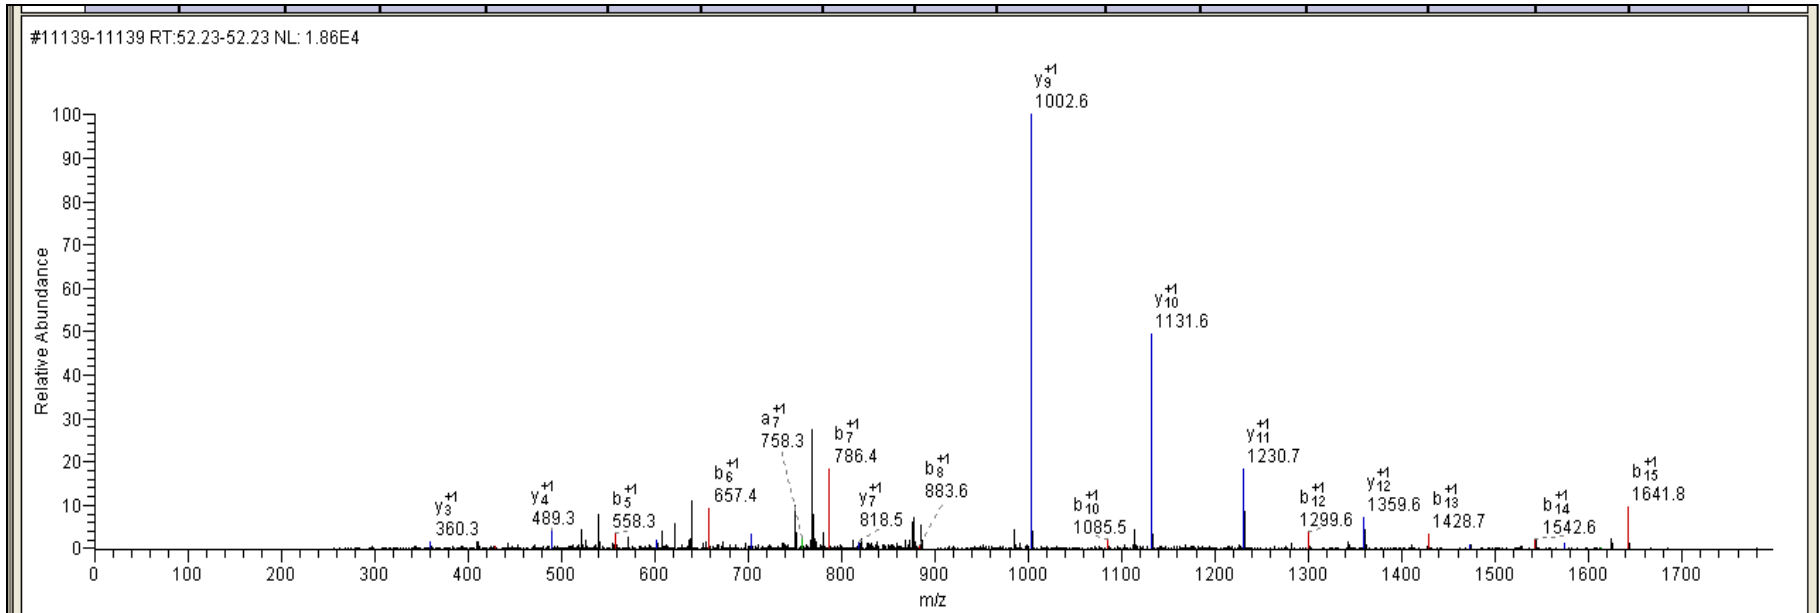

# Vha26 NP\_730957.1 Vacuolar H<sup>+</sup>-ATPase 26kD E subunit CG1088-PA

K.VREDHVSSVLDDAR.K

|    | AA | A       | B       | Y       |    |
|----|----|---------|---------|---------|----|
| 1  | V  | 72.08   | 100.08  | -       | 14 |
| 2  | R  | 228.18  | 256.18  | 1498.72 | 13 |
| 3  | E  | 357.22  | 385.22  | 1342.62 | 12 |
| 4  | D  | 472.25  | 500.25  | 1213.58 | 11 |
| 5  | H  | 609.31  | 637.31  | 1098.55 | 10 |
| 6  | V  | 708.38  | 736.37  | 961.49  | 9  |
| 7  | S  | 795.41  | 823.41  | 862.43  | 8  |
| 8  | S  | 882.44  | 910.44  | 775.39  | 7  |
| 9  | V  | 981.51  | 1009.51 | 688.36  | 6  |
| 10 | L  | 1094.60 | 1122.59 | 589.29  | 5  |
| 11 | D  | 1209.62 | 1237.62 | 476.21  | 4  |
| 12 | D  | 1324.65 | 1352.64 | 361.18  | 3  |
| 13 | A  | 1395.69 | 1423.68 | 246.16  | 2  |
| 14 | R  | -       | -       | 175.12  | 1  |

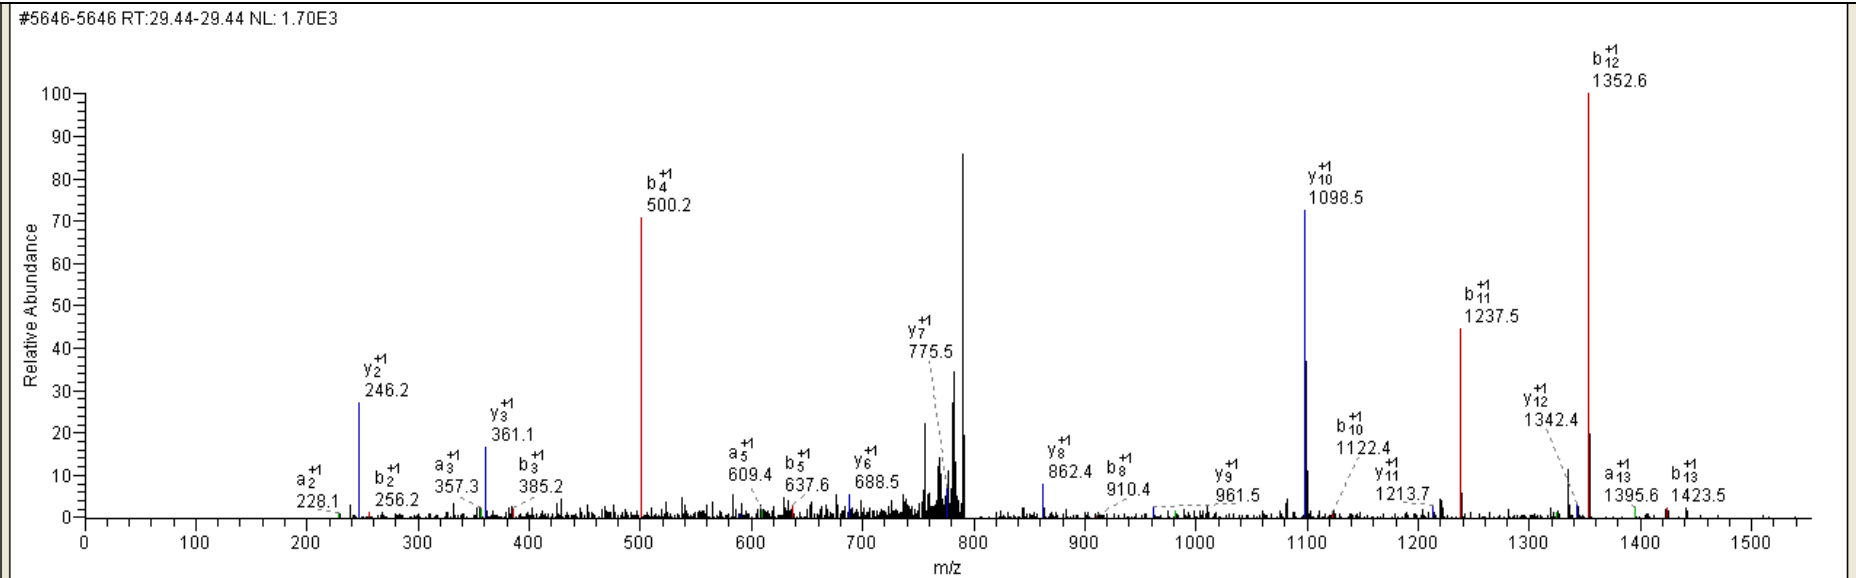

# Vha55 NP\_476908.1 Vacuolar H<sup>+</sup>-ATPase 55kd B subunit CG17369-PB

## R.IPASILAEFYPR.D

|    | AA | A       | B       | Y       |    |
|----|----|---------|---------|---------|----|
| 1  | I  | 86.10   | 114.09  | -       | 12 |
| 2  | P  | 183.15  | 211.14  | 1263.67 | 11 |
| 3  | A  | 254.19  | 282.18  | 1166.62 | 10 |
| 4  | S  | 341.22  | 369.21  | 1095.58 | 9  |
| 5  | I  | 454.30  | 482.30  | 1008.55 | 8  |
| 6  | L  | 567.39  | 595.38  | 895.47  | 7  |
| 7  | A  | 638.42  | 666.42  | 782.38  | 6  |
| 8  | E  | 767.47  | 795.46  | 711.35  | 5  |
| 9  | F  | 914.53  | 942.53  | 582.30  | 4  |
| 10 | Y  | 1077.60 | 1105.59 | 435.24  | 3  |
| 11 | P  | 1174.65 | 1202.65 | 272.17  | 2  |
| 12 | R  | -       | -       | 175.12  | 1  |

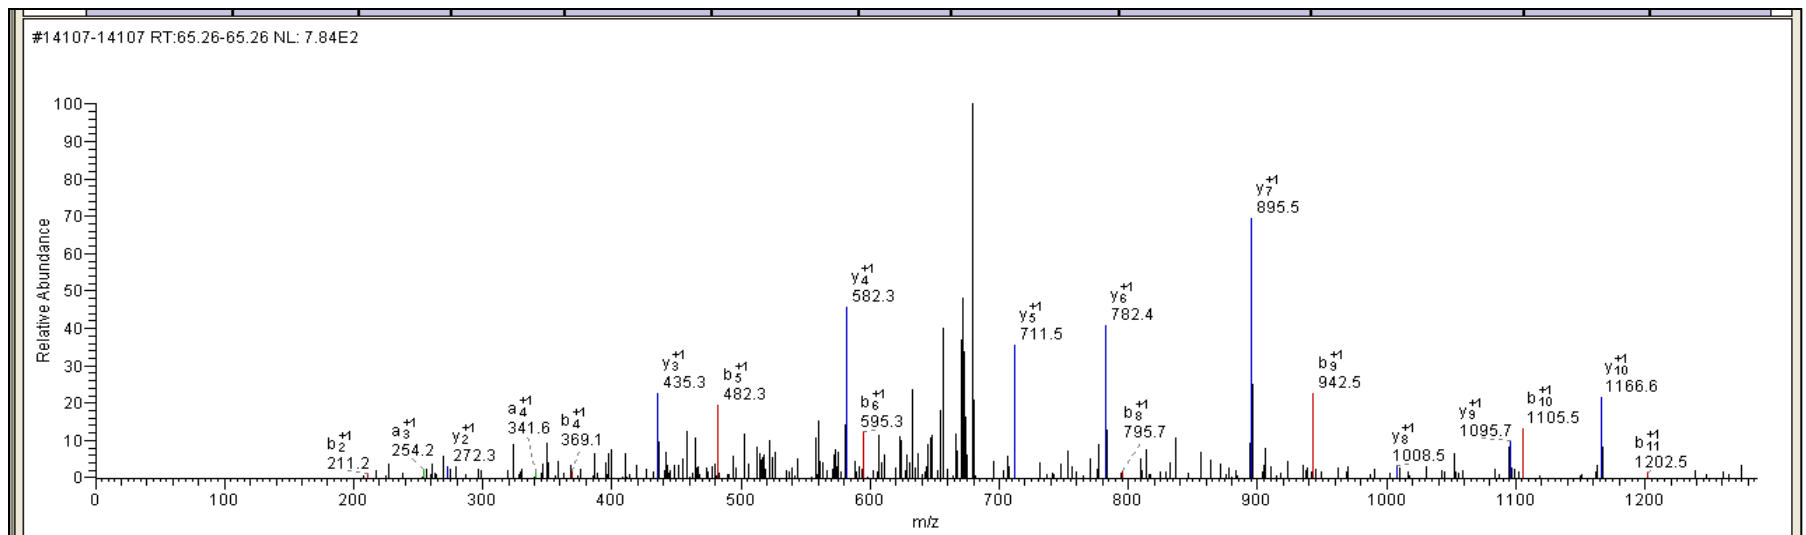

# Vap-33-1 NP\_570087.1 Vap-33-1 CG5014-PB

## K.SLFDLPLTIEPEHEL.R.F

|    | AA | A       | B       | Y       |    |
|----|----|---------|---------|---------|----|
| 1  | S  | 60.04   | 88.04   | -       | 16 |
| 2  | L  | 173.13  | 201.12  | 1821.97 | 15 |
| 3  | F  | 320.20  | 348.19  | 1708.89 | 14 |
| 4  | D  | 435.22  | 463.22  | 1561.82 | 13 |
| 5  | L  | 548.31  | 576.30  | 1446.80 | 12 |
| 6  | P  | 645.36  | 673.36  | 1333.71 | 11 |
| 7  | L  | 758.44  | 786.44  | 1236.66 | 10 |
| 8  | T  | 859.49  | 887.49  | 1123.57 | 9  |
| 9  | I  | 972.58  | 1000.57 | 1022.53 | 8  |
| 10 | E  | 1101.62 | 1129.61 | 909.44  | 7  |
| 11 | P  | 1198.67 | 1226.67 | 780.40  | 6  |
| 12 | E  | 1327.71 | 1355.71 | 683.35  | 5  |
| 13 | H  | 1464.77 | 1492.77 | 554.30  | 4  |
| 14 | E  | 1593.82 | 1621.81 | 417.25  | 3  |
| 15 | L  | 1706.90 | 1734.89 | 288.20  | 2  |
| 16 | R  | -       | -       | 175.12  | 1  |

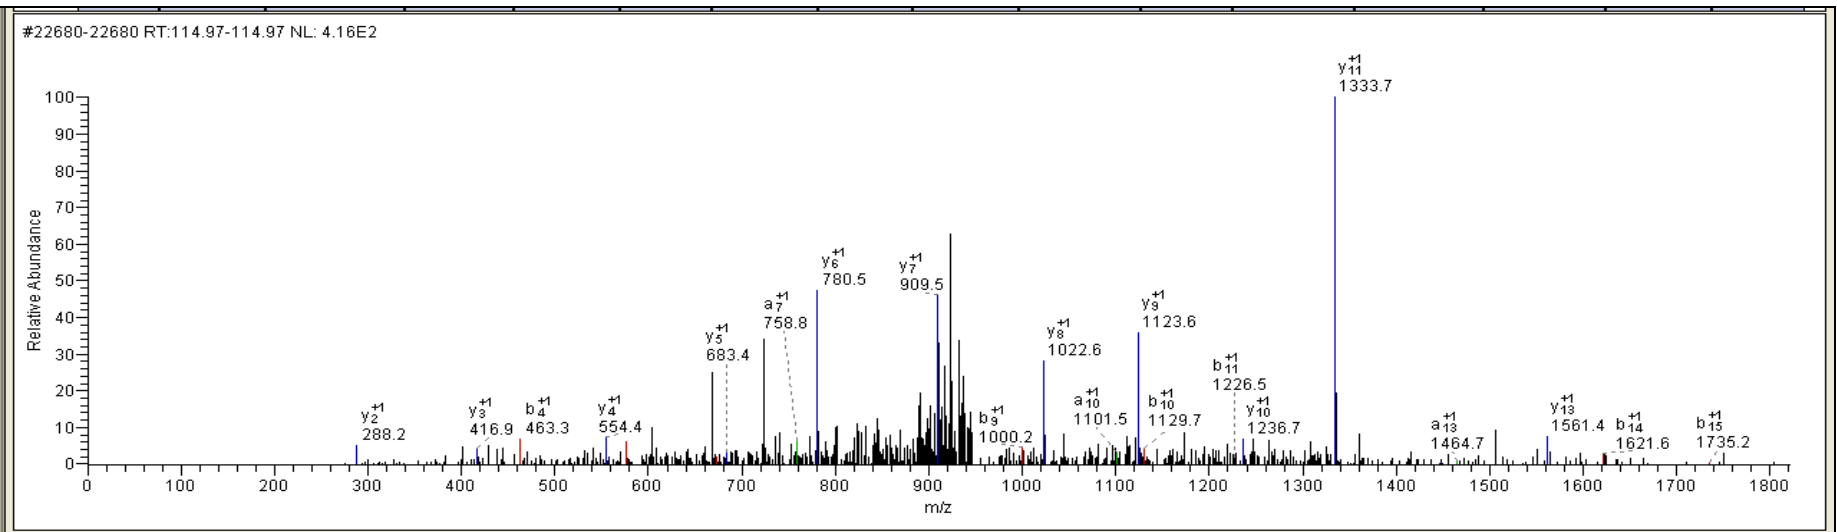



# Vha36 NP\_651987.1 Vha36 CG8186-PA

## K.FTSGDINQVVLQNVTK.A

|    | AA | A       | B       | Y       |    |
|----|----|---------|---------|---------|----|
| 1  | F  | 120.08  | 148.08  | -       | 16 |
| 2  | T  | 221.13  | 249.12  | 1615.86 | 15 |
| 3  | S  | 308.16  | 336.16  | 1514.82 | 14 |
| 4  | G  | 365.18  | 393.18  | 1427.79 | 13 |
| 5  | D  | 480.21  | 508.20  | 1370.76 | 12 |
| 6  | I  | 593.29  | 621.29  | 1255.74 | 11 |
| 7  | N  | 707.34  | 735.33  | 1142.65 | 10 |
| 8  | Q  | 835.39  | 863.39  | 1028.61 | 9  |
| 9  | V  | 934.46  | 962.46  | 900.55  | 8  |
| 10 | V  | 1033.53 | 1061.53 | 801.48  | 7  |
| 11 | L  | 1146.62 | 1174.61 | 702.41  | 6  |
| 12 | Q  | 1274.67 | 1302.67 | 589.33  | 5  |
| 13 | N  | 1388.72 | 1416.71 | 461.27  | 4  |
| 14 | V  | 1487.79 | 1515.78 | 347.23  | 3  |
| 15 | T  | 1588.83 | 1616.83 | 248.16  | 2  |
| 16 | K  | -       | -       | 147.11  | 1  |

#7047-7047 RT:36.76-36.76 NL: 1.70E3

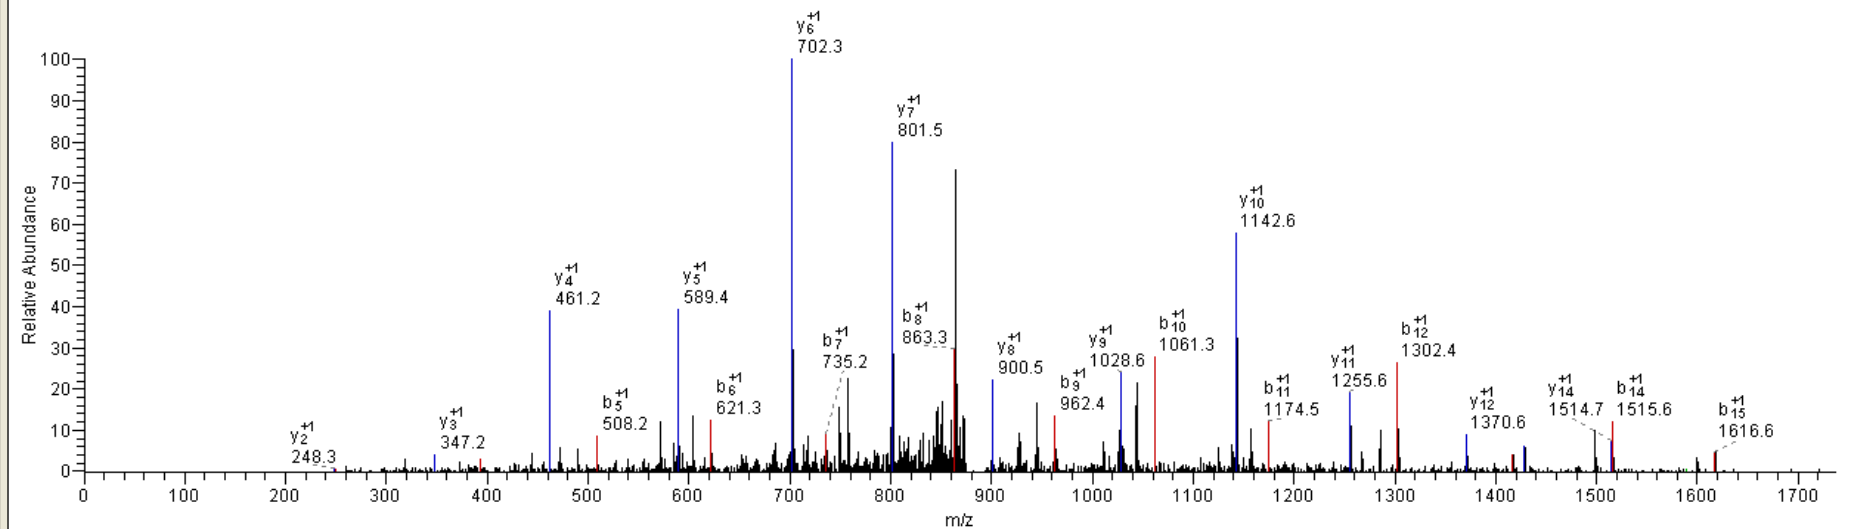

# Vha68-2 NP\_652004.2 Vha68-2 CG3762-PA

## R.ALDDFYDKNFPEFVPLR.T

|    | AA | A       | B       | Y       |    |
|----|----|---------|---------|---------|----|
| 1  | A  | 44.05   | 72.04   | -       | 17 |
| 2  | L  | 157.13  | 185.13  | 2014.99 | 16 |
| 3  | D  | 272.16  | 300.16  | 1901.91 | 15 |
| 4  | D  | 387.19  | 415.18  | 1786.88 | 14 |
| 5  | F  | 534.26  | 562.25  | 1671.85 | 13 |
| 6  | Y  | 697.32  | 725.31  | 1524.78 | 12 |
| 7  | D  | 812.35  | 840.34  | 1361.72 | 11 |
| 8  | K  | 940.44  | 968.44  | 1246.69 | 10 |
| 9  | N  | 1054.48 | 1082.48 | 1118.60 | 9  |
| 10 | F  | 1201.55 | 1229.55 | 1004.56 | 8  |
| 11 | P  | 1298.61 | 1326.60 | 857.49  | 7  |
| 12 | E  | 1427.65 | 1455.64 | 760.44  | 6  |
| 13 | F  | 1574.72 | 1602.71 | 631.39  | 5  |
| 14 | V  | 1673.78 | 1701.78 | 484.32  | 4  |
| 15 | P  | 1770.84 | 1798.83 | 385.26  | 3  |
| 16 | L  | 1883.92 | 1911.92 | 288.20  | 2  |
| 17 | R  | -       | -       | 175.12  | 1  |

#14350-14350 RT:68.91-68.91 NL: 1.25E3

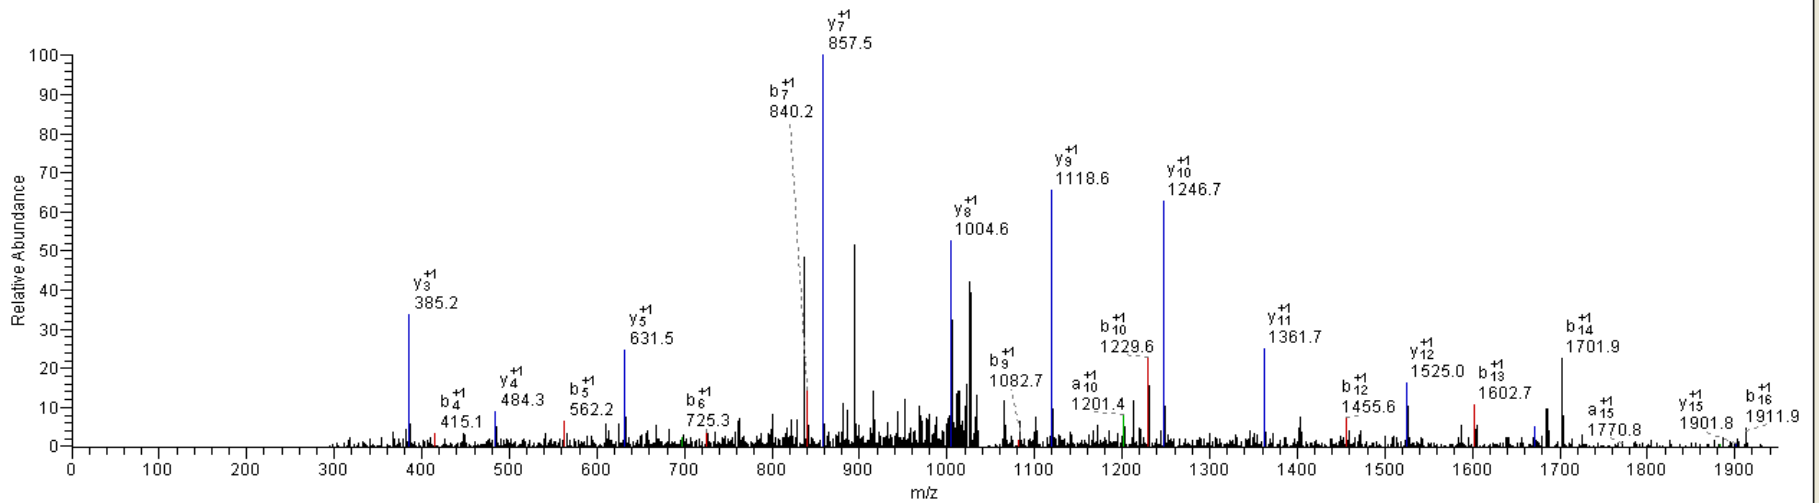

woc NP\_524886.2 without children CG5965-PA

K.SGSGTMLPVISTVQSLASGETEAR.I

| S no | AA | A       | B       | Y       |    |
|------|----|---------|---------|---------|----|
| 1    | S  | 60.04   | 88.04   | -       | 24 |
| 2    | G  | 117.07  | 145.06  | 2291.15 | 23 |
| 3    | S  | 204.1   | 232.09  | 2234.13 | 22 |
| 4    | G  | 261.12  | 289.11  | 2147.1  | 21 |
| 5    | T  | 362.17  | 390.16  | 2090.08 | 20 |
| 6    | M  | 493.21  | 521.2   | 1989.03 | 19 |
| 7    | L  | 606.29  | 634.29  | 1857.99 | 18 |
| 8    | P  | 703.34  | 731.34  | 1744.91 | 17 |
| 9    | V  | 802.41  | 830.41  | 1647.85 | 16 |
| 10   | I  | 915.5   | 943.49  | 1548.79 | 15 |
| 11   | S  | 1002.53 | 1030.52 | 1435.7  | 14 |
| 12   | T  | 1103.58 | 1131.57 | 1348.67 | 13 |
| 13   | V  | 1202.64 | 1230.64 | 1247.62 | 12 |
| 14   | Q  | 1330.7  | 1358.7  | 1148.55 | 11 |
| 15   | S  | 1417.74 | 1445.73 | 1020.5  | 10 |
| 16   | L  | 1530.82 | 1558.81 | 933.46  | 9  |
| 17   | A  | 1601.86 | 1629.85 | 820.38  | 8  |
| 18   | S  | 1688.89 | 1716.88 | 749.34  | 7  |
| 19   | G  | 1745.91 | 1773.91 | 662.31  | 6  |
| 20   | E  | 1874.95 | 1902.95 | 605.29  | 5  |
| 21   | T  | 1976    | 2004    | 476.25  | 4  |
| 22   | E  | 2105.04 | 2133.04 | 375.2   | 3  |
| 23   | A  | 2176.08 | 2204.08 | 246.16  | 2  |
| 24   | R  | -       | -       | 175.12  | 1  |

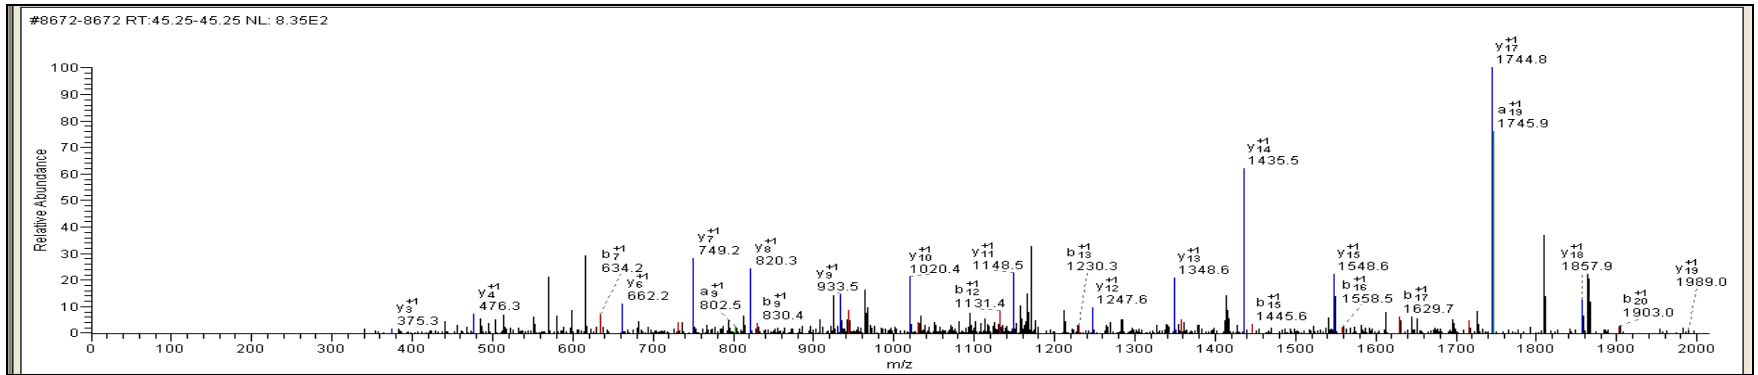

# Mf NP\_731970.1 Zeelin1 CG6803-PD

## R.ASSLEPLDELFER.L

|    | AA | A       | B       | Y       |    |
|----|----|---------|---------|---------|----|
| 1  | A  | 44.05   | 72.04   | -       | 13 |
| 2  | S  | 131.08  | 159.08  | 1434.71 | 12 |
| 3  | S  | 218.11  | 246.11  | 1347.68 | 11 |
| 4  | L  | 331.20  | 359.19  | 1260.65 | 10 |
| 5  | E  | 460.24  | 488.24  | 1147.56 | 9  |
| 6  | P  | 557.29  | 585.29  | 1018.52 | 8  |
| 7  | L  | 670.38  | 698.37  | 921.47  | 7  |
| 8  | D  | 785.40  | 813.40  | 808.38  | 6  |
| 9  | E  | 914.45  | 942.44  | 693.36  | 5  |
| 10 | L  | 1027.53 | 1055.53 | 564.31  | 4  |
| 11 | F  | 1174.60 | 1202.59 | 451.23  | 3  |
| 12 | E  | 1303.64 | 1331.64 | 304.16  | 2  |
| 13 | R  | -       | -       | 175.12  | 1  |

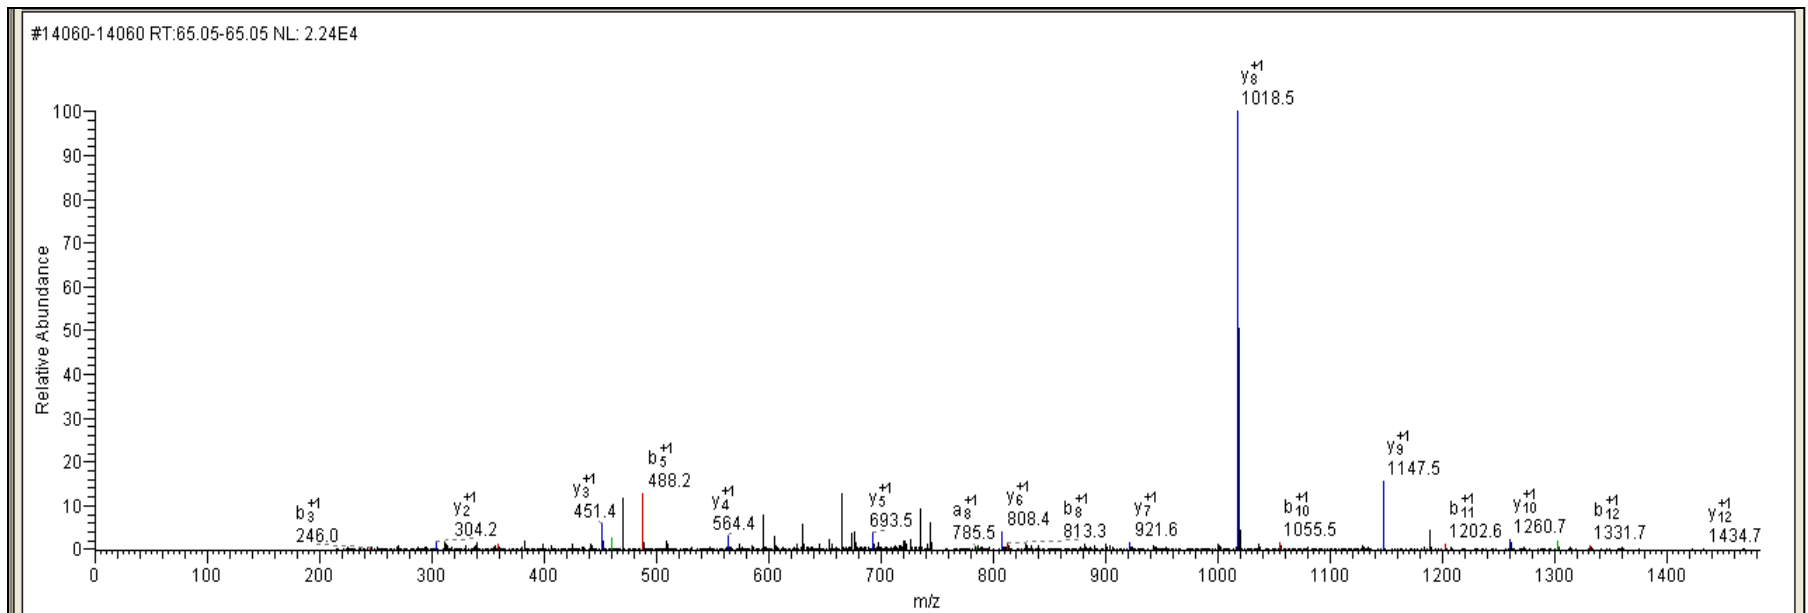

zormin NP\_001036578.1 zormin CG33484-PC

R.DSVEAGNLVNDIENYVTSR.E

|    | AA | A       | B       | Y       |    |
|----|----|---------|---------|---------|----|
| 1  | D  | 88.04   | 116.03  | -       | 19 |
| 2  | S  | 175.07  | 203.07  | 1979.97 | 18 |
| 3  | V  | 274.14  | 302.13  | 1892.93 | 17 |
| 4  | E  | 403.18  | 431.18  | 1793.87 | 16 |
| 5  | A  | 474.22  | 502.21  | 1664.82 | 15 |
| 6  | G  | 531.24  | 559.24  | 1593.79 | 14 |
| 7  | N  | 645.28  | 673.28  | 1536.77 | 13 |
| 8  | L  | 758.37  | 786.36  | 1422.72 | 12 |
| 9  | V  | 857.44  | 885.43  | 1309.64 | 11 |
| 10 | N  | 971.48  | 999.47  | 1210.57 | 10 |
| 11 | D  | 1086.51 | 1114.50 | 1096.53 | 9  |
| 12 | I  | 1199.59 | 1227.59 | 981.50  | 8  |
| 13 | E  | 1328.63 | 1356.63 | 868.42  | 7  |
| 14 | N  | 1442.68 | 1470.67 | 739.37  | 6  |
| 15 | Y  | 1605.74 | 1633.73 | 625.33  | 5  |
| 16 | V  | 1704.81 | 1732.80 | 462.27  | 4  |
| 17 | T  | 1805.86 | 1833.85 | 363.20  | 3  |
| 18 | S  | 1892.89 | 1920.88 | 262.15  | 2  |
| 19 | R  | -       | -       | 175.12  | 1  |

#15095-15095 RT:72.98-72.98 NL: 4.60E2

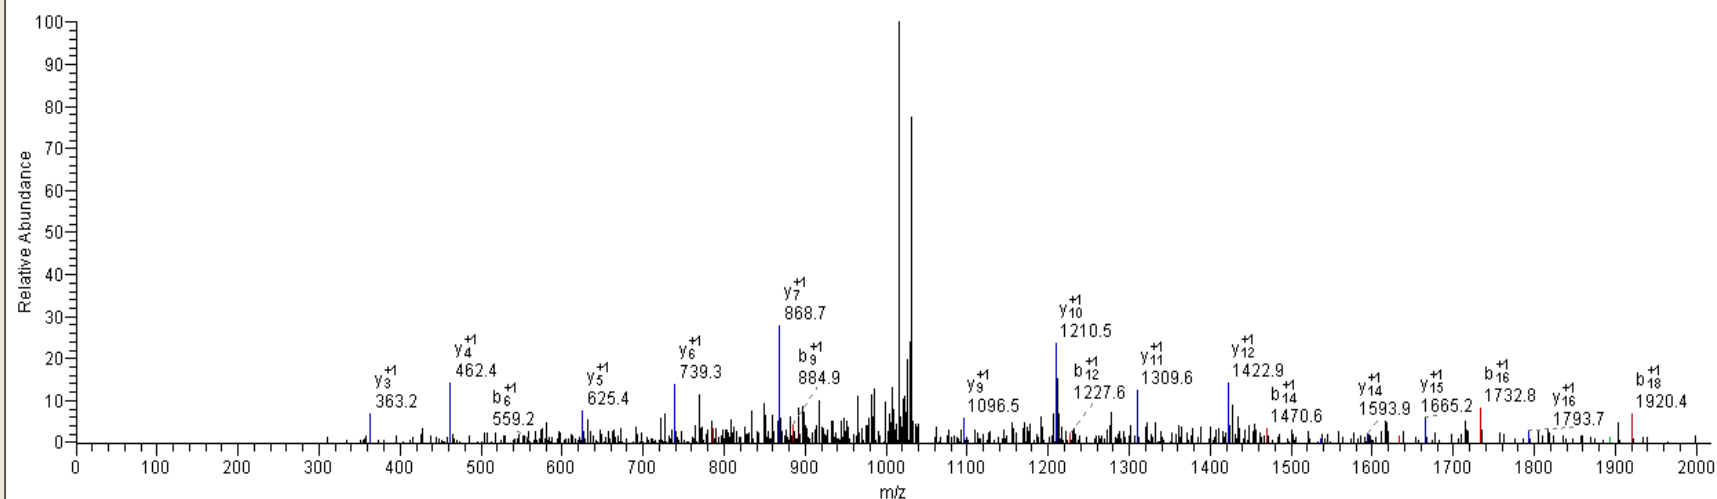

Supplement: supp_M110.001362_mcp.M110.001362-6.pdf [file supp_M110.001362_mcp.M110.001362-6.pdf]
